# Supplementary material
Source: Research Square preprint supplement (doi:10.21203/rs.3.rs-8884166/v1)
Supplement: Supplementary file 1 [file 115ad3d23d350e7e59a6efde.xlsx]

## Sheet: Online Resource 3
	Name	B_cells	Endothelial_cells	Epithelialcancer_cells	Fibroblasts	Macrophage	Neutrophils	Smooth_muscle_cells	T_cells
R-HSA-1059683	Interleukin-6 signaling	0.129918	0.178208	0.137134	0.169248	0.171792	0.20401	0.168453	0.155693
R-HSA-109703	PKB-mediated events	0.0465088	0.129492	0.060871	0.118162	0.119015	0.12837	0.0923562	0.120059
R-HSA-109704	PI3K Cascade	0.055656	0.0808017	0.0627219	0.0917831	0.0797436	0.112474	0.0858082	0.0786051
R-HSA-110056	MAPK3 (ERK1) activation	0.106701	0.169895	0.156644	0.145976	0.159499	0.157967	0.149397	0.151967
R-HSA-110312	Translesion synthesis by REV1	0.180974	0.178832	0.19143	0.180882	0.184291	0.171992	0.185465	0.199514
R-HSA-110313	Translesion synthesis by Y family DNA polymerases bypasses lesions on DNA template	0.177283	0.183264	0.183367	0.173997	0.185718	0.177229	0.179226	0.19616
R-HSA-110314	Recognition of DNA damage by PCNA-containing replication complex	0.195532	0.206025	0.212001	0.203081	0.208528	0.192411	0.206355	0.227743
R-HSA-110320	Translesion Synthesis by POLH	0.181977	0.190055	0.18385	0.180562	0.190814	0.175742	0.185696	0.195679
R-HSA-110328	Recognition and association of DNA glycosylase with site containing an affected pyrimidine	0.158474	0.160491	0.167051	0.154802	0.154173	0.136751	0.161155	0.170918
R-HSA-110329	Cleavage of the damaged pyrimidine	0.158474	0.160491	0.167051	0.154802	0.154173	0.136751	0.161155	0.170918
R-HSA-110330	Recognition and association of DNA glycosylase with site containing an affected purine	0.160971	0.150831	0.167306	0.151772	0.154507	0.132261	0.158377	0.179163
R-HSA-110331	Cleavage of the damaged purine	0.160971	0.150831	0.167306	0.151772	0.154507	0.132261	0.158377	0.179163
R-HSA-110357	Displacement of DNA glycosylase by APEX1	0.180376	0.232395	0.185233	0.252131	0.192522	0.169957	0.240476	0.160148
R-HSA-110362	POLB-Dependent Long Patch Base Excision Repair	0.13452	0.13652	0.143122	0.130728	0.136114	0.131585	0.126742	0.148319
R-HSA-110373	Resolution of AP sites via the multiple-nucleotide patch replacement pathway	0.142886	0.145282	0.177713	0.142128	0.156277	0.125675	0.143832	0.169837
R-HSA-110381	Resolution of AP sites via the single-nucleotide replacement pathway	0.237242	0.190131	0.201274	0.193312	0.215461	0.20397	0.205692	0.230422
R-HSA-111367	SLBP independent Processing of Histone Pre-mRNAs	0.251115	0.254562	0.259482	0.244148	0.252154	0.233852	0.251339	0.28389
R-HSA-111446	Activation of BIM and translocation to mitochondria	0.165872	0.144715	0.161556	0.168177	0.188068	0.192992	0.180104	0.180869
R-HSA-111447	Activation of BAD and translocation to mitochondria	0.130793	0.188879	0.163515	0.168848	0.15818	0.172114	0.181589	0.164496
R-HSA-111448	Activation of NOXA and translocation to mitochondria	0.195662	0.201611	0.213421	0.193718	0.202252	0.206175	0.20169	0.210806
R-HSA-111452	Activation and oligomerization of BAK protein	0.287203	0.268538	0.297093	0.273488	0.321219	0.275845	0.28065	0.272945
R-HSA-111453	BH3-only proteins associate with and inactivate anti-apoptotic BCL-2 members	0.206718	0.19911	0.197738	0.20524	0.21732	0.214742	0.190132	0.201906
R-HSA-111457	Release of apoptotic factors from the mitochondria	0.170253	0.163999	0.1832	0.159115	0.198375	0.15765	0.151824	0.174242
R-HSA-111458	Formation of apoptosome	0.115923	0.145245	0.131206	0.136547	0.138636	0.135596	0.127029	0.141366
R-HSA-111459	Activation of caspases through apoptosome-mediated cleavage	0.16125	0.173388	0.152	0.165992	0.15828	0.148125	0.146182	0.161305
R-HSA-111461	Cytochrome c-mediated apoptotic response	0.127032	0.15461	0.140694	0.145946	0.147943	0.143901	0.136418	0.152879
R-HSA-111463	SMAC (DIABLO) binds to IAPs	0.167112	0.164822	0.163125	0.166426	0.157751	0.144598	0.145796	0.159084
R-HSA-111464	SMAC(DIABLO)-mediated dissociation of IAP:caspase complexes	0.167112	0.164822	0.163125	0.166426	0.157751	0.144598	0.145796	0.159084
R-HSA-111465	Apoptotic cleavage of cellular proteins	0.105759	0.131329	0.130178	0.11648	0.125081	0.13225	0.118145	0.125733
R-HSA-111469	SMAC, XIAP-regulated apoptotic response	0.162905	0.161909	0.159458	0.163873	0.154004	0.142307	0.14515	0.155278
R-HSA-111471	Apoptotic factor-mediated response	0.132884	0.158664	0.156028	0.143008	0.16144	0.151981	0.136912	0.158984
R-HSA-111885	Opioid Signalling	0.114754	0.154217	0.134085	0.144164	0.148986	0.148407	0.153842	0.156013
R-HSA-111931	PKA-mediated phosphorylation of CREB	0.0964929	0.154295	0.136728	0.157001	0.163273	0.140268	0.18184	0.152544
R-HSA-111932	CaMK IV-mediated phosphorylation of CREB	0.147739	0.210878	0.171626	0.195629	0.186024	0.177147	0.194706	0.182493
R-HSA-111933	Calmodulin induced events	0.0954864	0.137427	0.112741	0.144468	0.13592	0.127932	0.151745	0.130518
R-HSA-111957	Cam-PDE 1 activation	-0.0167244	-0.0312087	0.00411918	0.0658481	0.0258226	0.0434538	0.109059	-0.0441724
R-HSA-111995	phospho-PLA2 pathway	0.127086	0.182952	0.153481	0.150096	0.203134	0.212384	0.139898	0.210036
R-HSA-111996	Ca-dependent events	0.10189	0.142518	0.117264	0.144065	0.148326	0.141997	0.148533	0.145743
R-HSA-111997	CaM pathway	0.0954864	0.137427	0.112741	0.144468	0.13592	0.127932	0.151745	0.130518
R-HSA-112040	G-protein mediated events	0.0935974	0.146822	0.118472	0.141021	0.148165	0.144504	0.146447	0.143363
R-HSA-112043	PLC beta mediated events	0.094547	0.146162	0.11585	0.139806	0.148677	0.144007	0.145064	0.142811
R-HSA-112122	ALKBH2 mediated reversal of alkylation damage	0.222756	0.189558	0.173177	0.229873	0.0276678	0.134321	0.215326	0.105261
R-HSA-112126	ALKBH3 mediated reversal of alkylation damage	0.220767	0.104478	0.16851	0.125081	0.0897755	0.0910892	0.0925659	0.158395
R-HSA-112303	Electric Transmission Across Gap Junctions	-0.0146563	-0.0204555	0.0462447	0.0202105	0.0604878	0.00868167	0.0474476	0.0134337
R-HSA-112307	Transmission across Electrical Synapses	-0.0146563	-0.0204555	0.0462447	0.0202105	0.0604878	0.00868167	0.0474476	0.0134337
R-HSA-112308	Presynaptic depolarization and calcium channel opening	-0.149251	-0.141133	-0.179633	-0.0687964	-0.194333	-0.188227	-0.0110004	-0.191401
R-HSA-112310	Neurotransmitter release cycle	0.100718	0.0979182	0.0943033	0.101375	0.0997311	0.0881645	0.0912386	0.10236
R-HSA-112311	Neurotransmitter clearance	0.0461552	0.0741518	0.0808245	0.0866999	0.0701205	0.0553873	0.0674715	0.0265256
R-HSA-112313	Neurotransmitter uptake and metabolism In glial cells	-0.0672558	-0.063673	-0.119507	-0.0137479	-0.00849825	0.0294199	-0.0508701	-0.0806224
R-HSA-112382	Formation of RNA Pol II elongation complex	0.167859	0.180516	0.177566	0.175419	0.172643	0.16449	0.184077	0.204584
R-HSA-112399	IRS-mediated signalling	0.0681859	0.0919849	0.0755166	0.0988636	0.0947945	0.11788	0.0934481	0.0908237
R-HSA-112409	RAF-independent MAPK1/3 activation	0.123271	0.168586	0.159204	0.150187	0.166532	0.173507	0.151304	0.175657
R-HSA-112411	MAPK1 (ERK2) activation	0.137893	0.186002	0.1558	0.164014	0.181258	0.21086	0.16487	0.179783
R-HSA-112412	SOS-mediated signalling	0.191757	0.221877	0.203338	0.217268	0.22425	0.223696	0.216627	0.203464
R-HSA-113418	Formation of the Early Elongation Complex	0.209744	0.205994	0.212898	0.20808	0.208546	0.200642	0.211253	0.242625
R-HSA-113501	Inhibition of replication initiation of damaged DNA by RB1/E2F1	0.142366	0.161709	0.176078	0.141989	0.152008	0.142931	0.157722	0.179847
R-HSA-113507	E2F-enabled inhibition of pre-replication complex formation	0.0662585	0.0871438	0.153406	0.0756917	0.110548	0.0498215	0.080935	0.132985
R-HSA-113510	E2F mediated regulation of DNA replication	0.124243	0.141061	0.168437	0.125541	0.141396	0.118792	0.137138	0.17133
R-HSA-114294	Activation, translocation and oligomerization of BAX	0.25224	0.204669	0.247114	0.193167	0.322314	0.277778	0.178368	0.251427
R-HSA-114452	Activation of BH3-only proteins	0.149957	0.190113	0.174553	0.174159	0.168039	0.182809	0.185222	0.174958
R-HSA-114508	Effects of PIP2 hydrolysis	0.0603246	0.0929901	0.0981835	0.0475636	0.128925	0.113846	0.0521581	0.151059
R-HSA-114516	Disinhibition of SNARE formation	0.146481	0.133454	0.107148	0.156562	0.14875	0.128732	0.155892	0.1318
R-HSA-114604	GPVI-mediated activation cascade	0.127437	0.148307	0.13385	0.141723	0.189198	0.196113	0.131818	0.187326
R-HSA-114608	Platelet degranulation	0.130643	0.169568	0.15151	0.171056	0.165986	0.168419	0.167089	0.146562
R-HSA-1168372	Downstream signaling events of B Cell Receptor (BCR)	0.202515	0.203903	0.205219	0.193098	0.211555	0.201201	0.197981	0.224015
R-HSA-1169091	Activation of NF-kappaB in B cells	0.201127	0.200969	0.208306	0.192567	0.208877	0.200503	0.19839	0.222114
R-HSA-1169092	Activation of RAS in B cells	0.183022	0.196128	0.156248	0.155365	0.19465	0.175407	0.16326	0.181071
R-HSA-1169408	ISG15 antiviral mechanism	0.147784	0.181037	0.168819	0.166225	0.180746	0.176183	0.167105	0.179462
R-HSA-1170546	Prolactin receptor signaling	0.116698	0.135438	0.122809	0.126317	0.124194	0.138014	0.141242	0.137878
R-HSA-1181150	Signaling by NODAL	0.0962574	0.16972	0.130584	0.142037	0.138773	0.16037	0.147058	0.136766
R-HSA-1187000	Fertilization	0.00778185	0.0914191	0.112659	0.0762137	0.0494375	0.0934098	0.099067	0.0461989
R-HSA-1221632	Meiotic synapsis	0.124088	0.119983	0.136294	0.114276	0.123968	0.110434	0.132245	0.148417
R-HSA-1222556	ROS and RNS production in phagocytes	0.104547	0.069107	0.0618725	0.0829103	0.137444	0.134217	0.0716633	0.0975696
R-HSA-1227986	Signaling by ERBB2	0.147266	0.17612	0.166891	0.166551	0.178549	0.177436	0.166979	0.178826
R-HSA-1234158	Regulation of gene expression by Hypoxia-inducible Factor	0.187684	0.205663	0.185195	0.184782	0.20753	0.216368	0.179919	0.198126
R-HSA-1234174	Cellular response to hypoxia	0.189139	0.209831	0.20338	0.203805	0.204362	0.198114	0.204116	0.207359
R-HSA-1234176	Oxygen-dependent proline hydroxylation of Hypoxia-inducible Factor Alpha	0.19335	0.211327	0.208361	0.209712	0.20836	0.195656	0.209114	0.211982
R-HSA-1236973	Cross-presentation of particulate exogenous antigens (phagosomes)	0.165667	0.195338	0.196361	0.191451	0.313644	0.307995	0.180789	0.192717
R-HSA-1236974	ER-Phagosome pathway	0.190706	0.186058	0.200491	0.180626	0.204455	0.190406	0.177751	0.192616
R-HSA-1236975	Antigen processing-Cross presentation	0.186643	0.179938	0.195843	0.176588	0.210811	0.194369	0.172953	0.188376
R-HSA-1236977	Endosomal/Vacuolar pathway	0.237533	0.232649	0.26099	0.24981	0.293108	0.230839	0.263618	0.24228
R-HSA-1236978	Cross-presentation of soluble exogenous antigens (endosomes)	0.212266	0.212451	0.234523	0.218412	0.232946	0.19838	0.21627	0.219291
R-HSA-1237044	Erythrocytes take up carbon dioxide and release oxygen	-0.00333027	0.00266633	0.00136358	-0.00723897	0.035693	0.0485619	-0.0476303	-0.0135791
R-HSA-1237112	Methionine salvage pathway	0.149199	0.150176	0.202766	0.153442	0.164673	0.149571	0.16633	0.148835
R-HSA-1247673	Erythrocytes take up oxygen and release carbon dioxide	-0.0284259	-0.00294026	-0.0325682	-0.0222181	0.0180268	0.0260686	-0.0648197	-0.0231364
R-HSA-1250196	SHC1 events in ERBB2 signaling	0.136832	0.17118	0.166985	0.16639	0.181933	0.179208	0.162657	0.16753
R-HSA-1250342	PI3K events in ERBB4 signaling	0.0692836	0.0820709	0.0625439	0.0968394	0.11791	0.146585	0.107728	0.102916
R-HSA-1250347	SHC1 events in ERBB4 signaling	0.0937353	0.166527	0.135653	0.135319	0.157835	0.174385	0.12812	0.11003
R-HSA-1251932	PLCG1 events in ERBB2 signaling	0.146242	0.186407	0.182633	0.183281	0.201741	0.198622	0.180878	0.187155
R-HSA-1251985	Nuclear signaling by ERBB4	0.160933	0.20481	0.199331	0.188326	0.184923	0.187729	0.189367	0.193354
R-HSA-1253288	Downregulation of ERBB4 signaling	0.181165	0.229324	0.21266	0.203191	0.216287	0.222065	0.19659	0.210644
R-HSA-1266695	Interleukin-7 signaling	0.15798	0.187131	0.170244	0.181502	0.183388	0.188656	0.185309	0.190461
R-HSA-1268020	Mitochondrial protein import	0.166558	0.13315	0.172442	0.144828	0.145671	0.117214	0.157037	0.153224
R-HSA-1295596	Spry regulation of FGF signaling	0.147818	0.200011	0.158427	0.18388	0.181388	0.203074	0.181137	0.180706
R-HSA-1296025	ATP sensitive Potassium channels	-0.368016	-0.337741	-0.475379	-0.145465	-0.473761	-0.218603	0.0182696	-0.45973
R-HSA-1296041	Activation of G protein gated Potassium channels	0.0758722	0.0997365	0.0922078	0.112298	0.105365	0.11445	0.102976	0.0777543
R-HSA-1296052	Ca2+ activated K+ channels	0.0324289	-0.0605844	-0.0626395	-0.0589814	0.00432152	-0.0962505	-0.0142499	-0.10648
R-HSA-1296053	Classical Kir channels	-0.0595464	0.0396817	0.0287925	-0.000301419	-0.0140577	0.0264969	-0.00379239	-0.0117465
R-HSA-1296059	G protein gated Potassium channels	0.0758722	0.0997365	0.0922078	0.112298	0.105365	0.11445	0.102976	0.0777543
R-HSA-1296061	HCN channels	0.131308	0.0253879	0.165186	0.138959	0.155671	0.0880886	0.0129666	0.115564
R-HSA-1296065	Inwardly rectifying K+ channels	0.0536555	0.0785644	0.0689547	0.0963906	0.0821424	0.0952019	0.0939873	0.0555136
R-HSA-1296067	Potassium transport channels	-0.0484619	0.00226126	0.0334356	0.0567043	-0.0209325	0.0398164	-0.0187786	-0.0927792
R-HSA-1296071	Potassium Channels	0.0097421	-0.00181573	0.0140109	0.0259697	0.0161678	0.0121466	0.0319534	-0.0146304
R-HSA-1296072	Voltage gated Potassium channels	-0.113017	-0.103559	-0.110842	-0.0951357	-0.103732	-0.125469	-0.0706302	-0.1263
R-HSA-1296346	Tandem pore domain potassium channels	0.0341686	-0.0426865	0.104487	0.133025	0.0282469	0.0359966	0.128528	-0.00552538
R-HSA-1299308	Tandem of pore domain in a weak inwardly rectifying K+ channels (TWIK)	0.144364	0.0475895	0.297403	0.332856	0.148392	0.170397	0.272071	0.10865
R-HSA-1299316	TWIK-releated acid-sensitive K+ channel (TASK)	0.0613026	0.0190486	0.0116782	0.0131062	0.0416881	0.0352924	0.161114	0.0276362
R-HSA-1299361	TWIK-related alkaline pH activated K+ channel (TALK)	-0.366761	-0.491802	-0.527079	-0.532295	-0.315253	-0.427211	-0.287844	-0.449735
R-HSA-1299503	TWIK related potassium channel (TREK)	-0.309954	-0.468201	-0.489897	-0.248178	-0.499089	-0.389202	-0.360053	-0.499834
R-HSA-1300642	Sperm Motility And Taxes	-0.176868	-0.154902	-0.132917	-0.14166	-0.115126	-0.151934	-0.104242	-0.137459
R-HSA-1300645	Acrosome Reaction and Sperm:Oocyte Membrane Binding	0.0971893	0.211988	0.229475	0.187498	0.140673	0.201864	0.212258	0.141494
R-HSA-1306955	GRB7 events in ERBB2 signaling	0.194273	0.212281	0.219396	0.218681	0.210061	0.208909	0.211601	0.206718
R-HSA-1307965	betaKlotho-mediated ligand binding	-0.173916	-0.0594986	-0.116273	-0.0127275	-0.100598	-0.0694154	-0.0305183	-0.116633
R-HSA-1358803	Downregulation of ERBB2:ERBB3 signaling	0.210543	0.236656	0.229123	0.233496	0.238363	0.236508	0.234284	0.239672
R-HSA-1362277	Transcription of E2F targets under negative control by DREAM complex	0.189289	0.197863	0.224535	0.190093	0.199901	0.18268	0.197476	0.232553
R-HSA-1362300	Transcription of E2F targets under negative control by p107 (RBL1) and p130 (RBL2) in complex with HDAC1	0.158176	0.181386	0.19304	0.172209	0.169198	0.161663	0.180014	0.210668
R-HSA-1362409	Mitochondrial iron-sulfur cluster biogenesis	0.217686	0.167692	0.203754	0.173164	0.188121	0.129696	0.183291	0.194205
R-HSA-1368071	NR1D1 (REV-ERBA) represses gene expression	0.148015	0.235735	0.203228	0.237518	0.184428	0.209859	0.235347	0.193634
R-HSA-1368082	RORA activates gene expression	0.184019	0.216823	0.178563	0.197866	0.196241	0.21393	0.201635	0.205028
R-HSA-1368108	BMAL1:CLOCK,NPAS2 activates circadian gene expression	0.154976	0.182579	0.15818	0.177234	0.169024	0.177919	0.185058	0.169513
R-HSA-1369007	Mitochondrial ABC transporters	-0.179156	-0.141179	-0.0761763	-0.120701	-0.116755	-0.260231	-0.0690887	-0.136714
R-HSA-1369062	ABC transporters in lipid homeostasis	0.0714168	0.0586024	0.0558578	0.117741	0.0656662	0.0618957	0.0723348	0.0240954
R-HSA-139853	Elevation of cytosolic Ca2+ levels	0.0699102	0.0561023	0.0270915	0.0343653	0.0591567	0.0966501	0.0338893	0.0679768
R-HSA-139910	Activation of BMF and translocation to mitochondria	0.166219	0.193534	0.157569	0.200453	0.179833	0.19838	0.198459	0.181158
R-HSA-139915	Activation of PUMA and translocation to mitochondria	0.188719	0.194127	0.204373	0.184174	0.19227	0.200228	0.192419	0.203812
R-HSA-140179	Amine Oxidase reactions	0.0410577	0.0843146	0.135817	0.0276189	0.0692159	-0.0639772	0.0581062	-0.00849642
R-HSA-140180	COX reactions	-0.218252	-0.241769	0.0377961	-0.314217	0.030623	-0.296851	-0.411831	-0.114067
R-HSA-140342	Apoptosis induced DNA fragmentation	0.190117	0.198574	0.214566	0.179936	0.218747	0.189646	0.179895	0.233477
R-HSA-140534	Caspase activation via Death Receptors in the presence of ligand	0.0705948	0.0922949	0.0722128	0.0755383	0.0850595	0.101508	0.0687938	0.0952707
R-HSA-140834	Extrinsic Pathway of Fibrin Clot Formation	-0.158464	0.000490847	-0.141707	0.0185131	-0.135947	-0.0398871	-0.0459806	-0.181611
R-HSA-140837	Intrinsic Pathway of Fibrin Clot Formation	0.0558388	0.130265	0.0968388	0.144642	0.0924758	0.0831909	0.133635	0.0712224
R-HSA-140875	Common Pathway of Fibrin Clot Formation	0.0074762	0.0629035	0.0470339	0.0810825	0.0406618	0.0507986	0.0488328	0.0295917
R-HSA-140877	Formation of Fibrin Clot (Clotting Cascade)	0.0276626	0.083257	0.069561	0.0961748	0.0636453	0.061913	0.070872	0.0430065
R-HSA-141333	Biogenic amines are oxidatively deaminated to aldehydes by MAOA and MAOB	-0.069716	0.182051	0.220907	0.0484826	0.0785588	0.0123087	0.122095	0.0609837
R-HSA-141334	PAOs oxidise polyamines to amines	0.23479	-0.139282	-0.0529972	-0.0145281	0.0505571	-0.251757	-0.0805328	-0.161446
R-HSA-141405	Inhibition of the proteolytic activity of APC/C required for the onset of anaphase by mitotic spindle checkpoint components	0.0985393	0.0880899	0.129309	0.0781216	0.0941658	0.0723949	0.0878653	0.115331
R-HSA-141424	Amplification of signal from the kinetochores	0.12342	0.141023	0.159445	0.12429	0.136957	0.126387	0.1385	0.161507
R-HSA-141430	Inactivation of APC/C via direct inhibition of the APC/C complex	0.0985393	0.0880899	0.129309	0.0781216	0.0941658	0.0723949	0.0878653	0.115331
R-HSA-141444	Amplification of signal from unattached kinetochores via a MAD2 inhibitory signal	0.12342	0.141023	0.159445	0.12429	0.136957	0.126387	0.1385	0.161507
R-HSA-1428517	Aerobic respiration and respiratory electron transport	0.183564	0.163234	0.188583	0.166614	0.177819	0.141468	0.172	0.179925
R-HSA-1433557	Signaling by SCF-KIT	0.106553	0.132036	0.105595	0.11832	0.152708	0.155564	0.117928	0.140916
R-HSA-1433559	Regulation of KIT signaling	0.109829	0.137889	0.110012	0.129666	0.159837	0.158423	0.122611	0.15117
R-HSA-1433617	Regulation of signaling by NODAL	-0.137432	-0.010536	-0.0919678	-0.0314953	-0.0939515	-0.0617512	0.0324203	-0.0780904
R-HSA-1442490	Collagen degradation	0.119857	0.146208	0.163812	0.213624	0.15505	0.164188	0.176864	0.0986217
R-HSA-1445148	Translocation of SLC2A4 (GLUT4) to the plasma membrane	0.120848	0.160633	0.144404	0.149634	0.13973	0.145028	0.158945	0.146368
R-HSA-1461957	Beta defensins	0.0188232	-0.0967317	0.0632554	-0.0789704	0.0654683	0.067148	-0.125735	0.0377669
R-HSA-1461973	Defensins	0.225828	0.152039	0.215845	0.170016	0.221551	0.199586	0.14858	0.222898
R-HSA-1462054	Alpha-defensins	0.303714	0.236258	0.271922	0.255952	0.279677	0.248899	0.239632	0.286429
R-HSA-1474151	Tetrahydrobiopterin (BH4) synthesis, recycling, salvage and regulation	0.144323	0.162571	0.146351	0.149773	0.17138	0.160142	0.15661	0.190463
R-HSA-1474165	Reproduction	0.107338	0.116326	0.137605	0.11086	0.114328	0.102388	0.127462	0.137498
R-HSA-1474228	Degradation of the extracellular matrix	0.0964905	0.136272	0.13292	0.169044	0.129903	0.143191	0.138266	0.0831048
R-HSA-1474290	Collagen formation	0.0970213	0.126479	0.131154	0.181505	0.0914667	0.12992	0.145407	0.0877586
R-HSA-1475029	Reversible hydration of carbon dioxide	-0.0348505	-0.0388778	0.162091	-0.00390621	0.0056225	0.0223387	0.042455	0.059561
R-HSA-1480926	O2/CO2 exchange in erythrocytes	-0.00333027	0.00266633	0.00136358	-0.00723897	0.035693	0.0485619	-0.0476303	-0.0135791
R-HSA-1482788	Acyl chain remodelling of PC	0.102631	0.0796901	0.102685	0.0938088	0.0863297	0.0581846	0.0801023	0.0605277
R-HSA-1482798	Acyl chain remodeling of CL	0.0438269	0.0911346	0.0919383	0.0419665	0.0691246	0.0300176	0.0819879	0.0607391
R-HSA-1482801	Acyl chain remodelling of PS	-0.0500902	-0.00938327	-0.0521268	-0.0140732	-0.0969405	-0.0592604	-0.00260418	-0.122706
R-HSA-1482839	Acyl chain remodelling of PE	0.0594793	0.0427538	0.0634107	0.0525819	0.0401897	0.00422201	0.0599074	0.0180499
R-HSA-1482883	Acyl chain remodeling of DAG and TAG	0.0710358	0.0906218	0.0487049	0.0595806	0.0693669	0.0579475	0.0537277	0.0310217
R-HSA-1482922	Acyl chain remodelling of PI	0.0106818	-0.00915385	0.0139301	0.0573209	0.0230089	-0.0276983	0.022941	-0.077152
R-HSA-1482925	Acyl chain remodelling of PG	-0.0310154	-0.038368	-0.0396967	0.00938618	-0.088594	-0.0602742	0.0194744	-0.145452
R-HSA-1483076	Synthesis of CL	0.371977	0.0976317	0.040742	0.118996	0.0915038	-0.0631004	0.181517	-0.00339516
R-HSA-1483101	Synthesis of PS	0.0530949	0.22854	0.151892	0.184692	0.187188	0.0912742	0.200538	0.154089
R-HSA-1483115	Hydrolysis of LPC	-0.109541	-0.108408	-0.0910643	-0.0898662	0.0724612	-0.0324471	-0.151217	-0.12917
R-HSA-1483148	Synthesis of PG	0.103576	0.119692	0.123278	0.118838	0.107028	0.121726	0.112414	0.0639339
R-HSA-1483152	Hydrolysis of LPE	0.108118	0.11669	0.0223618	0.0444834	0.275149	0.0724879	0.0944716	0.163109
R-HSA-1483166	Synthesis of PA	-0.00218721	0.0496002	0.0330191	0.0496013	0.0461863	0.0688649	0.0486998	-0.00612664
R-HSA-1483191	Synthesis of PC	0.162161	0.221015	0.173814	0.192294	0.206389	0.190767	0.18981	0.193594
R-HSA-1483196	PI and PC transport between ER and Golgi membranes	0.162755	0.250145	0.273344	0.160544	0.153498	0.125158	0.155408	0.221687
R-HSA-1483206	Glycerophospholipid biosynthesis	0.100883	0.119531	0.111117	0.108837	0.115069	0.101446	0.104884	0.0923496
R-HSA-1483213	Synthesis of PE	0.0829141	0.0552119	0.0400319	0.0722366	0.100882	0.0835549	0.0789021	0.100295
R-HSA-1483226	Synthesis of PI	0.0794945	0.111584	0.130287	0.0987934	0.0461451	0.094874	0.0952348	0.0903031
R-HSA-1483248	Synthesis of PIPs at the ER membrane	0.0895839	0.0449172	0.0141409	0.038105	0.00661719	0.0666898	0.0248852	0.0352433
R-HSA-1483249	Inositol phosphate metabolism	0.0453386	0.101856	0.0471403	0.0922267	0.083579	0.101615	0.106517	0.0757209
R-HSA-1483255	PI Metabolism	0.0895567	0.112501	0.07754	0.103654	0.10567	0.124083	0.115652	0.104677
R-HSA-1483257	Phospholipid metabolism	0.0975823	0.11675	0.0968755	0.107096	0.113894	0.112937	0.112018	0.100572
R-HSA-1489509	DAG and IP3 signaling	0.0890833	0.135569	0.10315	0.141071	0.139263	0.137784	0.143654	0.13065
R-HSA-1500620	Meiosis	0.115026	0.114033	0.137402	0.109398	0.115595	0.0975104	0.126311	0.142026
R-HSA-1502540	Signaling by Activin	0.0740315	0.152512	0.111105	0.133108	0.117818	0.150825	0.131051	0.117624
R-HSA-1538133	G0 and Early G1	0.179728	0.186913	0.214388	0.18029	0.19235	0.173231	0.190603	0.224527
R-HSA-156580	Phase II - Conjugation of compounds	0.056296	0.0537593	0.0782843	0.0869301	0.0508372	0.0485663	0.0654022	0.038776
R-HSA-156581	Methylation	0.0805773	0.0742595	0.0838729	0.0934169	0.0767139	0.0671961	0.0873393	0.0592517
R-HSA-156582	Acetylation	0.0563622	0.0271503	-0.0391219	0.0144165	0.0656178	0.0335407	0.032195	0.100419
R-HSA-156584	Cytosolic sulfonation of small molecules	0.0242925	0.0347775	0.0699671	0.0776613	0.0210835	0.0330629	0.0105743	-0.0113675
R-HSA-156587	Amino Acid conjugation	-0.318437	-0.260227	-0.240187	-0.193939	-0.209629	-0.346818	-0.221928	-0.298342
R-HSA-156588	Glucuronidation	0.0357962	0.0719118	0.117349	0.106183	0.0559691	0.0451962	0.0932603	0.0783208
R-HSA-156590	Glutathione conjugation	0.0818863	0.0656104	0.100575	0.122048	0.0602557	0.053697	0.0938537	0.0435093
R-HSA-1566948	Elastic fibre formation	0.0549505	0.150716	0.097982	0.197779	0.105559	0.142776	0.149467	0.0640786
R-HSA-1566977	Fibronectin matrix formation	0.0547225	0.22695	0.164545	0.214569	0.20825	0.214285	0.19267	0.119151
R-HSA-156711	Polo-like kinase mediated events	0.12637	0.148748	0.17116	0.134563	0.151686	0.16192	0.143387	0.177357
R-HSA-156827	L13a-mediated translational silencing of Ceruloplasmin expression	0.33263	0.349347	0.328436	0.347391	0.336159	0.335032	0.354187	0.344961
R-HSA-156842	Eukaryotic Translation Elongation	0.325266	0.349179	0.331818	0.349937	0.338319	0.329965	0.353414	0.339669
R-HSA-156902	Peptide chain elongation	0.334412	0.357525	0.338643	0.35503	0.34658	0.33933	0.359316	0.350478
R-HSA-157579	Telomere Maintenance	0.154431	0.157467	0.174071	0.151551	0.157646	0.130353	0.163055	0.186062
R-HSA-157858	Gap junction trafficking and regulation	0.128934	0.146087	0.146167	0.153143	0.142657	0.144761	0.148642	0.131494
R-HSA-15869	Metabolism of nucleotides	0.133393	0.149372	0.168296	0.144691	0.161655	0.135689	0.148536	0.149426
R-HSA-1592230	Mitochondrial biogenesis	0.146715	0.164761	0.162583	0.162638	0.150572	0.157985	0.170623	0.163267
R-HSA-159227	Transport of the SLBP independent Mature mRNA	0.139373	0.162203	0.163899	0.152909	0.157426	0.156078	0.1656	0.177373
R-HSA-159230	Transport of the SLBP Dependant Mature mRNA	0.138723	0.162285	0.163815	0.15201	0.158345	0.155618	0.16502	0.178141
R-HSA-159231	Transport of Mature mRNA Derived from an Intronless Transcript	0.142282	0.162703	0.165214	0.154306	0.157895	0.1531	0.166945	0.17792
R-HSA-159234	Transport of Mature mRNAs Derived from Intronless Transcripts	0.141628	0.162778	0.165121	0.153435	0.15877	0.152699	0.166378	0.17865
R-HSA-159236	Transport of Mature mRNA derived from an Intron-Containing Transcript	0.168791	0.185739	0.174707	0.16553	0.16577	0.166387	0.176886	0.198951
R-HSA-1592389	Activation of Matrix Metalloproteinases	0.025334	0.0711303	0.123981	0.14258	0.0696479	0.0844528	0.0666597	0.0105345
R-HSA-159418	Recycling of bile acids and salts	0.142859	0.14669	0.14691	0.148882	0.170123	0.149638	0.128561	0.157283
R-HSA-159424	Conjugation of carboxylic acids	-0.318437	-0.260227	-0.240187	-0.193939	-0.209629	-0.346818	-0.221928	-0.298342
R-HSA-159740	Gamma-carboxylation of protein precursors	0.0704958	0.13798	0.0834486	0.181504	0.0799614	0.0783893	0.178049	0.0520445
R-HSA-159763	Transport of gamma-carboxylated protein precursors from the endoplasmic reticulum to the Golgi apparatus	0.0551594	0.134037	0.0804824	0.177303	0.0737324	0.076396	0.172608	0.0443808
R-HSA-159782	Removal of aminoterminal propeptides from gamma-carboxylated proteins	0.0355379	0.147588	0.107442	0.168578	0.0878217	0.0847778	0.158401	0.0402333
R-HSA-159854	Gamma-carboxylation, transport, and amino-terminal cleavage of proteins	0.0500464	0.150455	0.108914	0.172664	0.0926767	0.0861789	0.163832	0.047171
R-HSA-1606322	ZBP1(DAI) mediated induction of type I IFNs	0.210328	0.213584	0.212411	0.188694	0.232797	0.24292	0.192531	0.240036
R-HSA-1606341	IRF3 mediated activation of type 1 IFN	0.180099	0.199144	0.182739	0.165031	0.194515	0.225714	0.166283	0.231279
R-HSA-1614517	Sulfide oxidation to sulfate	0.122851	-0.0196695	0.103126	-0.00643446	0.0501054	0.071516	-0.0137903	0.0658984
R-HSA-1614558	Degradation of cysteine and homocysteine	0.0711933	0.0382739	0.0616082	0.0223552	0.0383363	0.0463818	0.0302339	0.0717336
R-HSA-1614603	Cysteine formation from homocysteine	0.0205628	0.0906601	0.0115774	0.0720252	0.0668106	0.0173582	0.0739184	0.0909696
R-HSA-1614635	Sulfur amino acid metabolism	0.0913426	0.0829262	0.104128	0.0754753	0.081423	0.0737468	0.0829736	0.095342
R-HSA-162658	Golgi Cisternae Pericentriolar Stack Reorganization	0.0748624	0.0916649	0.101462	0.0783283	0.0901237	0.0920472	0.0868231	0.113591
R-HSA-162699	Synthesis of dolichyl-phosphate mannose	0.318657	0.273294	0.278893	0.303023	0.21449	0.184092	0.307688	0.241492
R-HSA-162710	Synthesis of glycosylphosphatidylinositol (GPI)	0.119626	0.0664537	0.0763586	0.0638891	0.0507774	0.00913754	0.0579428	0.0462168
R-HSA-162791	Attachment of GPI anchor to uPAR	0.166017	0.07421	0.145946	0.168845	0.112253	0.0230102	0.139005	0.0952839
R-HSA-1630316	Glycosaminoglycan metabolism	0.0334805	0.0793366	0.0544518	0.130862	0.0954147	0.100578	0.0947223	0.0207699
R-HSA-163125	Post-translational modification: synthesis of GPI-anchored proteins	0.00505615	-0.0220543	0.0527983	0.0248646	0.0118223	-0.0184104	-0.0133641	-0.0172407
R-HSA-163200	Respiratory electron transport, ATP synthesis by chemiosmotic coupling, and heat production by uncoupling proteins.	0.177309	0.147813	0.179931	0.160411	0.162332	0.122294	0.166441	0.168608
R-HSA-163210	Formation of ATP by chemiosmotic coupling	0.27274	0.272932	0.281963	0.296365	0.272757	0.244105	0.314244	0.269152
R-HSA-163282	Mitochondrial transcription initiation	0.205267	0.182456	0.276173	0.185255	0.201118	0.18064	0.155076	0.219061
R-HSA-163316	Mitochondrial transcription termination	-0.157237	-0.105547	-0.144429	-0.0753162	-0.113435	-0.297198	-0.042556	-0.11726
R-HSA-163358	PKA-mediated phosphorylation of key metabolic factors	0.136024	0.166082	0.168487	0.179181	0.20826	0.170591	0.199568	0.19897
R-HSA-163359	Glucagon signaling in metabolic regulation	0.120261	0.159478	0.147949	0.161194	0.17325	0.154606	0.180128	0.157921
R-HSA-163560	Triglyceride catabolism	0.13589	0.17109	0.171419	0.165515	0.164789	0.158794	0.182369	0.16638
R-HSA-163615	PKA activation	0.101992	0.154617	0.138627	0.160166	0.16535	0.141976	0.186018	0.152302
R-HSA-163680	AMPK inhibits chREBP transcriptional activation activity	0.0870977	0.0867121	0.088309	0.0951358	0.0877991	0.100339	0.101964	0.100416
R-HSA-163685	Integration of energy metabolism	0.0961289	0.124435	0.107939	0.120609	0.11971	0.118045	0.130564	0.118599
R-HSA-163754	Insulin effects increased synthesis of Xylulose-5-Phosphate	0.17583	0.155984	0.158362	0.174697	0.198588	0.145973	0.181415	0.205538
R-HSA-163765	ChREBP activates metabolic gene expression	0.0344207	0.0931923	0.118329	0.0663314	0.108238	0.0901223	0.0763815	0.0935128
R-HSA-163767	PP2A-mediated dephosphorylation of key metabolic factors	0.0943547	0.161458	0.127902	0.139618	0.129233	0.14437	0.159782	0.158627
R-HSA-1638074	Keratan sulfate/keratin metabolism	0.0216919	0.0921823	0.0471494	0.163624	0.0902808	0.111384	0.124404	0.0283757
R-HSA-1638091	Heparan sulfate/heparin (HS-GAG) metabolism	0.0118333	0.0628006	0.0504518	0.114341	0.0820346	0.05923	0.0774645	0.00376562
R-HSA-163841	Gamma carboxylation, hypusinylation, hydroxylation, and arylsulfatase activation	0.153947	0.175152	0.153052	0.175727	0.146983	0.132901	0.175222	0.148797
R-HSA-164378	PKA activation in glucagon signalling	0.106982	0.1589	0.139693	0.158099	0.173247	0.147967	0.181147	0.159855
R-HSA-164952	The role of Nef in HIV-1 replication and disease pathogenesis	0.116858	0.144627	0.12569	0.139507	0.177738	0.172146	0.13887	0.182939
R-HSA-1650814	Collagen biosynthesis and modifying enzymes	0.100528	0.108353	0.114725	0.174746	0.0844551	0.126239	0.140519	0.0856116
R-HSA-165158	Activation of AKT2	0.0766252	0.0790692	0.106644	0.112896	0.078133	0.0932226	0.115852	0.0730979
R-HSA-165159	MTOR signalling	0.130457	0.17873	0.15917	0.166658	0.154885	0.170861	0.181434	0.160474
R-HSA-165160	PDE3B signalling	0.0465088	0.129492	0.060871	0.118162	0.119015	0.12837	0.0923562	0.120059
R-HSA-165181	Inhibition of TSC complex formation by PKB	0.255896	0.285223	0.30733	0.285326	0.284831	0.308459	0.276099	0.283361
R-HSA-1655829	Regulation of cholesterol biosynthesis by SREBP (SREBF)	0.150541	0.164221	0.156189	0.161386	0.169188	0.178117	0.157432	0.165251
R-HSA-166020	Transfer of LPS from LBP carrier to CD14	0.0878555	0.239986	0.148166	0.215666	0.196756	0.230918	0.194042	-0.00036588
R-HSA-1660499	Synthesis of PIPs at the plasma membrane	0.0877457	0.115826	0.082819	0.110765	0.107243	0.125843	0.125435	0.111834
R-HSA-1660514	Synthesis of PIPs at the Golgi membrane	0.14739	0.156613	0.119188	0.129886	0.155259	0.143701	0.130169	0.145924
R-HSA-1660516	Synthesis of PIPs at the early endosome membrane	0.122617	0.146122	0.0890384	0.12362	0.169486	0.109043	0.13411	0.158047
R-HSA-1660517	Synthesis of PIPs at the late endosome membrane	0.0758627	0.102828	0.0496206	0.0750682	0.123775	0.0736916	0.0910116	0.10009
R-HSA-1660661	Sphingolipid de novo biosynthesis	0.100486	0.115979	0.103093	0.125125	0.0802345	0.0869029	0.120831	0.0841574
R-HSA-1660662	Glycosphingolipid metabolism	0.0914913	0.0981219	0.0754794	0.108189	0.129119	0.123726	0.0806598	0.0842568
R-HSA-166187	Mitochondrial Uncoupling	-0.202377	-0.319499	-0.243762	-0.341901	-0.162428	-0.371449	-0.302045	-0.180096
R-HSA-166208	mTORC1-mediated signalling	0.129017	0.201019	0.171388	0.17749	0.16091	0.173114	0.195861	0.154559
R-HSA-1663150	The activation of arylsulfatases	0.138241	0.111702	0.0629196	0.162511	0.134191	0.0560786	0.128262	0.0492397
R-HSA-166658	Complement cascade	0.0898081	0.0911511	0.0916704	0.134821	0.136493	0.13247	0.0871131	0.0604136
R-HSA-166662	Lectin pathway of complement activation	-0.0931386	0.00470821	-0.13321	0.0612935	0.136662	0.0792199	0.0429899	-0.181168
R-HSA-166663	Initial triggering of complement	0.114041	0.0251924	0.0665046	0.0935977	0.157159	0.148474	0.0231738	0.0424356
R-HSA-166665	Terminal pathway of complement	0.0142903	0.0773844	0.0485112	0.108744	0.0196631	-0.0147098	0.0623909	0.00637108
R-HSA-166786	Creation of C4 and C2 activators	0.171924	0.0576422	0.053398	0.139243	0.222598	0.223627	0.0477404	0.0421793
R-HSA-167021	PLC-gamma1 signalling	0.0345644	0.113267	0.0337365	0.129844	0.139998	0.171563	0.134197	0.0971469
R-HSA-167044	Signalling to RAS	0.120005	0.17385	0.145252	0.150529	0.169009	0.194456	0.157672	0.142047
R-HSA-167060	NGF processing	-0.0172847	0.0988641	0.0955463	0.0943157	0.0742025	0.0649893	0.0969041	0.0020978
R-HSA-167826	The fatty acid cycling model	-0.184254	-0.295959	-0.221354	-0.318073	-0.119898	-0.368317	-0.2782	-0.138529
R-HSA-167827	The proton buffering model	-0.184254	-0.295959	-0.221354	-0.318073	-0.119898	-0.368317	-0.2782	-0.138529
R-HSA-1679131	Trafficking and processing of endosomal TLR	0.113181	0.111094	0.117385	0.135428	0.126786	0.092715	0.108762	0.0686175
R-HSA-168638	NOD1/2 Signaling Pathway	0.200836	0.207744	0.212008	0.187895	0.208338	0.210867	0.189348	0.219101
R-HSA-168927	TICAM1, RIP1-mediated IKK complex recruitment	0.178151	0.186899	0.186304	0.174327	0.188902	0.192752	0.174198	0.198138
R-HSA-169893	Prolonged ERK activation events	0.10844	0.178483	0.139265	0.153613	0.146852	0.167441	0.165109	0.148365
R-HSA-169911	Regulation of Apoptosis	0.213371	0.230379	0.225625	0.22682	0.225386	0.212537	0.228591	0.224114
R-HSA-170145	Phosphorylation of proteins involved in the G2/M transition by Cyclin A:Cdc2 complexes	0.117867	0.152558	0.229554	0.138537	0.171048	0.110975	0.146039	0.202205
R-HSA-170660	Adenylate cyclase activating pathway	-0.244004	-0.0497071	-0.141927	-0.0624944	-0.126224	-0.0923952	0.0304671	-0.158328
R-HSA-170670	Adenylate cyclase inhibitory pathway	-0.0830401	0.0535785	0.0181028	0.0570005	0.00268709	0.0272938	0.116263	-0.0103108
R-HSA-170822	Regulation of Glucokinase by Glucokinase Regulatory Protein	0.10415	0.125039	0.153667	0.12314	0.140144	0.116826	0.121056	0.158151
R-HSA-170968	Frs2-mediated activation	0.110742	0.18695	0.149837	0.15921	0.155109	0.17133	0.17253	0.154717
R-HSA-170984	ARMS-mediated activation	0.109447	0.182291	0.139095	0.159272	0.143568	0.167654	0.174186	0.142803
R-HSA-171007	p38MAPK events	0.153292	0.199075	0.182983	0.174325	0.195888	0.205594	0.183978	0.185225
R-HSA-171306	Packaging Of Telomere Ends	0.163228	0.152719	0.171384	0.15154	0.157203	0.134786	0.159452	0.182449
R-HSA-171319	Telomere Extension By Telomerase	0.15457	0.161203	0.175744	0.149797	0.167397	0.140744	0.158992	0.185552
R-HSA-173599	Formation of the active cofactor, UDP-glucuronate	0.103421	0.169716	0.207326	0.208494	0.139532	0.127588	0.193797	0.176277
R-HSA-173623	Classical antibody-mediated complement activation	0.324127	0.0934061	0.152373	0.187132	0.275819	0.31024	0.0508311	0.159194
R-HSA-173736	Alternative complement activation	-0.0159958	-0.0479145	0.0520049	0.0433748	0.0631982	0.0739266	-0.021053	0.0209504
R-HSA-174048	APC/C:Cdc20 mediated degradation of Cyclin B	0.158415	0.171412	0.181655	0.169814	0.163324	0.148024	0.172089	0.181521
R-HSA-174084	Autodegradation of Cdh1 by Cdh1:APC/C	0.194722	0.201736	0.212755	0.198764	0.19945	0.181864	0.200511	0.205597
R-HSA-174113	SCF-beta-TrCP mediated degradation of Emi1	0.193209	0.196484	0.204625	0.192617	0.195536	0.180007	0.197838	0.206834
R-HSA-174143	APC/C-mediated degradation of cell cycle proteins	0.161169	0.16589	0.184602	0.159325	0.17135	0.154359	0.168946	0.188331
R-HSA-174154	APC/C:Cdc20 mediated degradation of Securin	0.192976	0.198591	0.212029	0.195842	0.196114	0.176926	0.197044	0.203722
R-HSA-174178	APC/C:Cdh1 mediated degradation of Cdc20 and other APC/C:Cdh1 targeted proteins in late mitosis/early G1	0.170503	0.178422	0.199108	0.172565	0.180936	0.163705	0.179686	0.193364
R-HSA-174184	Cdc20:Phospho-APC/C mediated degradation of Cyclin A	0.184115	0.192105	0.209029	0.186788	0.192651	0.170335	0.189922	0.205562
R-HSA-174362	Transport and synthesis of PAPS	0.164899	0.130443	0.135035	0.299345	0.196336	0.254567	0.161565	0.0880787
R-HSA-174403	Glutathione synthesis and recycling	-0.0467193	-7.49e-05	0.0342474	-0.0273443	-0.0125769	-0.016641	-0.0276832	-0.0435653
R-HSA-174411	Polymerase switching on the C-strand of the telomere	0.160731	0.157904	0.177695	0.15533	0.16767	0.134876	0.1573	0.175906
R-HSA-174414	Processive synthesis on the C-strand of the telomere	0.169855	0.153744	0.190221	0.157048	0.181429	0.141825	0.160306	0.184056
R-HSA-174417	Telomere C-strand (Lagging Strand) Synthesis	0.149608	0.146038	0.173056	0.143167	0.158134	0.122007	0.14862	0.167349
R-HSA-174430	Telomere C-strand synthesis initiation	0.168732	0.161467	0.165855	0.157438	0.166806	0.144539	0.159679	0.172218
R-HSA-174437	Removal of the Flap Intermediate from the C-strand	0.178448	0.16139	0.194383	0.163889	0.188657	0.151469	0.167386	0.19107
R-HSA-174577	Activation of C3 and C5	-0.0166289	-0.0455898	0.00910453	0.0214463	0.000959136	-0.00762768	-0.0375451	-0.0571771
R-HSA-174824	Plasma lipoprotein assembly, remodeling, and clearance	0.139957	0.165448	0.154969	0.170529	0.172009	0.156978	0.168797	0.152135
R-HSA-176187	Activation of ATR in response to replication stress	0.0731827	0.0817135	0.124614	0.0610899	0.0942723	0.0631924	0.0766704	0.123278
R-HSA-176407	Conversion from APC/C:Cdc20 to APC/C:Cdh1 in late anaphase	0.0893432	0.0774104	0.11999	0.064014	0.0791528	0.0573226	0.0734855	0.102819
R-HSA-176408	Regulation of APC/C activators between G1/S and early anaphase	0.159587	0.167036	0.183315	0.159346	0.170411	0.154079	0.167926	0.185743
R-HSA-176409	APC/C:Cdc20 mediated degradation of mitotic proteins	0.182553	0.189127	0.207659	0.185876	0.190019	0.167448	0.187434	0.203927
R-HSA-176412	Phosphorylation of the APC/C	0.0906048	0.112045	0.147017	0.100379	0.109695	0.0919385	0.110983	0.134975
R-HSA-176417	Phosphorylation of Emi1	0.0728972	0.099815	0.155612	0.0802649	0.112285	0.0841562	0.08916	0.142324
R-HSA-176814	Activation of APC/C and APC/C:Cdc20 mediated degradation of mitotic proteins	0.164979	0.178179	0.196629	0.171493	0.177766	0.159562	0.175109	0.192969
R-HSA-176974	Unwinding of DNA	0.0467263	0.0832497	0.135212	0.0431546	0.0848338	0.0520541	0.0623339	0.111407
R-HSA-177128	Conjugation of salicylate with glycine	-0.293863	-0.236564	-0.200752	-0.15592	-0.169387	-0.321301	-0.187555	-0.270508
R-HSA-177135	Conjugation of benzoate with glycine	-0.279215	-0.22543	-0.228786	-0.173471	-0.185984	-0.311877	-0.18934	-0.259889
R-HSA-177162	Conjugation of phenylacetate with glutamine	-0.344734	-0.386458	-0.395751	-0.340598	-0.421909	-0.491135	-0.348073	-0.460573
R-HSA-177504	Retrograde neurotrophin signalling	0.113269	0.167539	0.129978	0.155466	0.161984	0.155541	0.164138	0.142327
R-HSA-177929	Signaling by EGFR	0.109563	0.14441	0.136655	0.135033	0.145609	0.150685	0.131873	0.139491
R-HSA-1793185	Chondroitin sulfate/dermatan sulfate metabolism	0.0568702	0.100167	0.0526693	0.152606	0.10627	0.118165	0.133451	0.0347272
R-HSA-179409	APC-Cdc20 mediated degradation of Nek2A	0.157555	0.166067	0.172501	0.160599	0.158258	0.150275	0.165179	0.171778
R-HSA-179419	APC:Cdc20 mediated degradation of cell cycle proteins prior to satisfation of the cell cycle checkpoint	0.18331	0.190889	0.208285	0.185801	0.191268	0.168788	0.188772	0.204446
R-HSA-179812	GRB2 events in EGFR signaling	0.152429	0.184157	0.185981	0.178541	0.197968	0.195229	0.176442	0.185141
R-HSA-1799339	SRP-dependent cotranslational protein targeting to membrane	0.339945	0.345679	0.340751	0.351869	0.345263	0.339653	0.349735	0.34375
R-HSA-180024	DARPP-32 events	0.13806	0.169956	0.157536	0.154304	0.168856	0.160998	0.171847	0.186544
R-HSA-180292	GAB1 signalosome	0.131813	0.17422	0.158703	0.160882	0.186599	0.188274	0.15801	0.176503
R-HSA-180336	SHC1 events in EGFR signaling	0.148025	0.184893	0.18111	0.172545	0.191614	0.194271	0.170416	0.176796
R-HSA-180786	Extension of Telomeres	0.148885	0.151659	0.176972	0.142176	0.160016	0.123807	0.152512	0.177731
R-HSA-1810476	RIP-mediated NFkB activation via ZBP1	0.21647	0.214171	0.214987	0.190205	0.239303	0.246067	0.1942	0.24174
R-HSA-181429	Serotonin Neurotransmitter Release Cycle	0.0921326	0.0898991	0.0698441	0.0803365	0.0862975	0.0640754	0.0720498	0.0989845
R-HSA-181430	Norepinephrine Neurotransmitter Release Cycle	0.0944101	0.094001	0.0748915	0.0824125	0.0877063	0.0653742	0.0756392	0.0995054
R-HSA-181431	Acetylcholine binding and downstream events	-0.0494083	0.0105637	0.0624497	0.0619042	0.0846044	0.0774519	0.0602795	0.0559194
R-HSA-182971	EGFR downregulation	0.116519	0.1516	0.146173	0.14626	0.149346	0.154937	0.141888	0.143021
R-HSA-1834941	STING mediated induction of host immune responses	0.142237	0.175108	0.161814	0.156755	0.160927	0.175289	0.149273	0.171023
R-HSA-1834949	Cytosolic sensors of pathogen-associated DNA	0.160041	0.182934	0.167793	0.165804	0.173145	0.184115	0.164017	0.185998
R-HSA-1855167	Synthesis of pyrophosphates in the cytosol	0.164312	0.15322	0.112839	0.148953	0.160844	0.152677	0.177705	0.154695
R-HSA-1855183	Synthesis of IP2, IP, and Ins in the cytosol	-0.00141255	0.0472761	0.0443963	0.0384207	0.0544013	0.0678408	0.0769	0.0613367
R-HSA-1855191	Synthesis of IPs in the nucleus	0.0650806	0.149105	0.0927511	0.127241	0.0857198	0.143972	0.126146	0.0931026
R-HSA-1855204	Synthesis of IP3 and IP4 in the cytosol	0.0509809	0.118475	0.0498129	0.103563	0.0974629	0.113362	0.112117	0.0785354
R-HSA-1855231	Synthesis of IPs in the ER lumen	0.176603	0.00211628	0.0457917	0.0748837	0.0439447	-0.00146425	0.0538771	0.0140371
R-HSA-186712	Regulation of beta-cell development	0.13545	0.162007	0.146117	0.150553	0.1548	0.161237	0.161719	0.16665
R-HSA-186763	Downstream signal transduction	0.0782784	0.129353	0.0941163	0.112703	0.125581	0.141462	0.11272	0.120544
R-HSA-186797	Signaling by PDGF	0.0797693	0.127952	0.0906266	0.119961	0.123195	0.145275	0.116435	0.114034
R-HSA-187015	Activation of TRKA receptors	-0.000168543	0.0396617	0.0303935	0.0782276	0.0261778	0.0883322	0.109869	-0.0123611
R-HSA-187024	NGF-independant TRKA activation	-0.00962417	0.031226	0.0191523	0.0707479	0.0183082	0.0882322	0.10685	-0.0259899
R-HSA-187042	TRKA activation by NGF	0.0980737	0.177286	0.100992	0.158219	0.166212	0.216187	0.235805	0.1185
R-HSA-187577	SCF(Skp2)-mediated degradation of p27/p21	0.170459	0.176315	0.190528	0.169698	0.175157	0.162117	0.17623	0.191174
R-HSA-187687	Signalling to ERKs	0.113445	0.179224	0.141513	0.153895	0.153509	0.174856	0.161927	0.148905
R-HSA-187706	Signalling to p38 via RIT and RIN	0.259561	0.27782	0.266797	0.25411	0.308752	0.322359	0.276435	0.282742
R-HSA-189085	Digestion of dietary carbohydrate	-0.0267898	0.0184186	-0.04058	0.0999509	-0.00384325	0.0271674	0.0430716	-0.00130819
R-HSA-189200	Cellular hexose transport	0.0211569	0.0488964	0.0609535	0.065327	0.0615237	0.0733219	0.0660886	0.0363826
R-HSA-189445	Metabolism of porphyrins	0.0767468	0.0712512	0.0976127	0.0773683	0.0736781	0.060365	0.0772529	0.0746717
R-HSA-189451	Heme biosynthesis	0.0510802	0.05669	0.0768218	0.0759489	0.0472395	0.0490434	0.0867272	0.056646
R-HSA-189483	Heme degradation	0.115745	0.10703	0.12306	0.0930899	0.113824	0.0854955	0.0796838	0.101635
R-HSA-190236	Signaling by FGFR	0.127457	0.160596	0.130378	0.151332	0.148614	0.157704	0.151041	0.154471
R-HSA-190239	FGFR3 ligand binding and activation	-0.149576	-0.148342	-0.0643426	-0.0437761	-0.11822	-0.0296321	-0.0983115	-0.219046
R-HSA-190241	FGFR2 ligand binding and activation	-0.174379	-0.110453	-0.149209	-0.00507273	-0.143808	-0.0471958	-0.0440393	-0.183995
R-HSA-190242	FGFR1 ligand binding and activation	-0.109185	0.0167377	-0.0236777	0.0607829	-0.0587976	-0.000963014	0.0282899	-0.0931747
R-HSA-190322	FGFR4 ligand binding and activation	-0.178905	-0.137687	-0.127066	-0.0332982	-0.130086	-0.0598512	-0.0816912	-0.225959
R-HSA-190370	FGFR1b ligand binding and activation	-0.0196698	0.105985	0.0643925	0.161855	0.0049004	0.0963113	0.127826	-0.0449009
R-HSA-190371	FGFR3b ligand binding and activation	-0.250924	-0.214809	-0.145688	-0.128416	-0.269998	-0.160168	-0.100776	-0.291717
R-HSA-190372	FGFR3c ligand binding and activation	-0.149576	-0.148342	-0.0643426	-0.0437761	-0.11822	-0.0296321	-0.0983115	-0.219046
R-HSA-190373	FGFR1c ligand binding and activation	-0.130959	0.0271025	-0.0131715	0.0730358	-0.0502046	0.00972353	0.0349781	-0.104264
R-HSA-190374	FGFR1c and Klotho ligand binding and activation	-0.274725	0.0524288	-0.135697	0.0864561	-0.123818	-0.0571042	-0.0273182	-0.178952
R-HSA-190375	FGFR2c ligand binding and activation	-0.196167	-0.114598	-0.125458	-0.0180174	-0.12855	-0.0367571	-0.0656734	-0.223864
R-HSA-190377	FGFR2b ligand binding and activation	-0.0772071	-0.05414	-0.0733533	0.10935	-0.0527175	0.058513	0.0566814	-0.122044
R-HSA-190704	Oligomerization of connexins into connexons	0.0605187	0.0252587	0.0657378	0.0522611	0.0800417	0.0570148	0.0192478	0.0474284
R-HSA-190827	Transport of connexins along the secretory pathway	0.0605187	0.0252587	0.0657378	0.0522611	0.0800417	0.0570148	0.0192478	0.0474284
R-HSA-190828	Gap junction trafficking	0.120774	0.133046	0.134304	0.140317	0.134985	0.135638	0.134691	0.123969
R-HSA-190840	Microtubule-dependent trafficking of connexons from Golgi to the plasma membrane	0.176766	0.220899	0.222543	0.243774	0.19351	0.194218	0.236347	0.185496
R-HSA-190861	Gap junction assembly	0.102518	0.0959474	0.124652	0.119137	0.112471	0.115246	0.104143	0.0919734
R-HSA-190872	Transport of connexons to the plasma membrane	0.107771	0.143195	0.150559	0.150727	0.116545	0.129126	0.137642	0.112604
R-HSA-190873	Gap junction degradation	0.127778	0.167442	0.136948	0.16729	0.149454	0.152895	0.169615	0.142411
R-HSA-1912399	Pre-NOTCH Processing in the Endoplasmic Reticulum	0.210311	0.307713	0.258678	0.265721	0.261717	0.293237	0.296882	0.278759
R-HSA-1912408	Pre-NOTCH Transcription and Translation	0.179177	0.197839	0.19593	0.189548	0.18806	0.189797	0.199398	0.206984
R-HSA-1912420	Pre-NOTCH Processing in Golgi	0.214029	0.23967	0.223473	0.245252	0.227921	0.259375	0.248874	0.220134
R-HSA-1912422	Pre-NOTCH Expression and Processing	0.180686	0.19783	0.195702	0.191537	0.189809	0.192322	0.199379	0.205532
R-HSA-191273	Cholesterol biosynthesis	0.141992	0.105201	0.131082	0.119239	0.128636	0.099941	0.0971482	0.113044
R-HSA-191650	Regulation of gap junction activity	0.128427	0.206242	0.178436	0.209594	0.138219	0.166626	0.226758	0.119431
R-HSA-191859	snRNP Assembly	0.17109	0.175508	0.188256	0.168693	0.172074	0.159518	0.176386	0.197404
R-HSA-192105	Synthesis of bile acids and bile salts	0.0918869	0.125114	0.105793	0.145158	0.117786	0.12088	0.121009	0.0935358
R-HSA-192456	Digestion of dietary lipid	-0.0871986	-0.190124	-0.067523	-0.247294	-0.161363	-0.0446392	-0.248186	-0.0943647
R-HSA-193048	Androgen biosynthesis	0.0203027	-0.0196003	0.0418036	-0.000323172	0.000540311	-0.0219642	0.00540263	-0.00969937
R-HSA-193144	Estrogen biosynthesis	0.149058	0.104222	0.0818778	0.142699	0.14465	0.0862937	0.105886	0.130413
R-HSA-193368	Synthesis of bile acids and bile salts via 7alpha-hydroxycholesterol	0.0807765	0.121813	0.097643	0.14675	0.117907	0.122902	0.116218	0.0899227
R-HSA-193634	Axonal growth inhibition (RHOA activation)	0.132658	0.158282	0.152889	0.169281	0.14118	0.150173	0.169073	0.142422
R-HSA-193639	p75NTR signals via NF-kB	0.195349	0.207613	0.196432	0.197072	0.219099	0.222356	0.200463	0.211964
R-HSA-193648	NRAGE signals death through JNK	0.1057	0.136435	0.123909	0.119585	0.137018	0.144215	0.129528	0.133562
R-HSA-193670	p75NTR negatively regulates cell cycle via SC1	0.151389	0.201076	0.1747	0.201377	0.177647	0.173087	0.217499	0.202273
R-HSA-193681	Ceramide signalling	0.0330153	0.0901901	0.0328917	0.116718	0.107178	0.0755981	0.129612	0.0584705
R-HSA-193692	Regulated proteolysis of p75NTR	0.201411	0.212507	0.218231	0.201986	0.229752	0.229214	0.194207	0.220157
R-HSA-193697	p75NTR regulates axonogenesis	0.131638	0.158359	0.150518	0.163145	0.142266	0.147683	0.171134	0.13739
R-HSA-193775	Synthesis of bile acids and bile salts via 24-hydroxycholesterol	-0.0157838	0.0156076	0.0293487	0.0601003	0.0133641	0.00188393	-0.0140655	-0.0148108
R-HSA-193807	Synthesis of bile acids and bile salts via 27-hydroxycholesterol	0.074783	0.117249	0.0903489	0.156447	0.107211	0.123795	0.10728	0.0817728
R-HSA-193993	Mineralocorticoid biosynthesis	0.0332006	-0.00851038	0.0939285	0.0715999	0.0599355	0.0766276	0.0524598	0.098346
R-HSA-194002	Glucocorticoid biosynthesis	-0.00499681	-0.0244893	-0.021334	-0.0015887	-0.0319806	-0.0593712	-0.00609971	-0.0332745
R-HSA-194068	Bile acid and bile salt metabolism	0.110107	0.118314	0.122398	0.130731	0.137328	0.120578	0.101214	0.118099
R-HSA-194306	Neurophilin interactions with VEGF and VEGFR	0.106706	0.270316	0.123986	0.195737	0.206643	0.24087	0.190349	0.108405
R-HSA-194313	VEGF ligand-receptor interactions	0.125808	0.25026	0.114889	0.199091	0.1974	0.228443	0.174973	0.107871
R-HSA-194441	Metabolism of non-coding RNA	0.17109	0.175508	0.188256	0.168693	0.172074	0.159518	0.176386	0.197404
R-HSA-195253	Degradation of beta-catenin by the destruction complex	0.147332	0.173054	0.158952	0.165035	0.154855	0.159304	0.172482	0.178171
R-HSA-195399	VEGF binds to VEGFR leading to receptor dimerization	0.125808	0.25026	0.114889	0.199091	0.1974	0.228443	0.174973	0.107871
R-HSA-196025	Formation of annular gap junctions	0.128718	0.166476	0.133275	0.165801	0.151554	0.154729	0.166024	0.143277
R-HSA-196071	Metabolism of steroid hormones	0.0949914	0.057103	0.0655465	0.0854521	0.0995149	0.0486345	0.0560863	0.0844366
R-HSA-196108	Pregnenolone biosynthesis	0.101227	0.0825112	0.102524	0.0813211	0.154153	0.0953797	0.0432404	0.128642
R-HSA-196299	Beta-catenin phosphorylation cascade	0.10378	0.176969	0.14136	0.155954	0.147168	0.160632	0.15608	0.146818
R-HSA-1963640	GRB2 events in ERBB2 signaling	0.153553	0.187533	0.189445	0.184148	0.200173	0.194885	0.181391	0.189651
R-HSA-1963642	PI3K events in ERBB2 signaling	0.14301	0.178388	0.176005	0.175939	0.196178	0.195652	0.174598	0.186622
R-HSA-196741	Cobalamin (Cbl, vitamin B12) transport and metabolism	0.0557907	0.0615783	0.0750007	0.0112246	0.0180387	0.0262172	0.0114106	0.0324556
R-HSA-196757	Metabolism of folate and pterines	0.032122	-0.020701	0.0382941	-0.000615944	0.0859543	0.023122	-0.0113507	0.00394105
R-HSA-196780	Biotin transport and metabolism	0.0106401	0.0252208	0.0763465	-0.00325802	0.0395467	0.0189958	0.0195691	0.0167514
R-HSA-196783	Coenzyme A biosynthesis	0.239125	0.23862	0.23354	0.218387	0.224025	0.184587	0.238352	0.222464
R-HSA-196791	Vitamin D (calciferol) metabolism	0.0763821	0.0799799	0.089069	0.0734049	0.0838099	0.0874075	0.0840795	0.121492
R-HSA-196807	Nicotinate metabolism	0.0890299	0.0885981	0.10319	0.116618	0.11642	0.122287	0.0990248	0.0890063
R-HSA-196819	Vitamin B1 (thiamin) metabolism	-0.0946485	-0.0613994	-0.110153	-0.0987297	0.0738812	0.041384	-0.129904	-0.00373553
R-HSA-196836	Vitamin C (ascorbate) metabolism	0.0795218	0.0800665	0.085015	0.114677	0.0653014	0.083039	0.101574	0.104872
R-HSA-196843	Vitamin B2 (riboflavin) metabolism	0.0544264	0.139924	0.105264	0.194251	0.0992071	0.0394127	0.116389	0.0878027
R-HSA-196849	Metabolism of water-soluble vitamins and cofactors	0.0652363	0.0663603	0.0799311	0.0709384	0.0764852	0.0655135	0.060527	0.0620363
R-HSA-196854	Metabolism of vitamins and cofactors	0.095406	0.100042	0.104929	0.103914	0.10551	0.0913758	0.0992335	0.0968895
R-HSA-1971475	A tetrasaccharide linker sequence is required for GAG synthesis	0.0305972	0.104389	0.0882487	0.155275	0.118767	0.108045	0.141841	0.0361001
R-HSA-197264	Nicotinamide salvaging	0.0867735	0.11608	0.131229	0.130488	0.122963	0.146301	0.109372	0.114497
R-HSA-1980143	Signaling by NOTCH1	0.16706	0.189457	0.187524	0.183478	0.178866	0.17706	0.190514	0.196301
R-HSA-1980145	Signaling by NOTCH2	0.19214	0.218557	0.195632	0.210562	0.208093	0.215414	0.211663	0.20858
R-HSA-198203	PI3K/AKT activation	0.141536	0.161282	0.135688	0.160772	0.163925	0.197481	0.180307	0.169005
R-HSA-198323	AKT phosphorylates targets in the cytosol	0.174305	0.200538	0.193373	0.181427	0.205907	0.19833	0.186957	0.210285
R-HSA-198693	AKT phosphorylates targets in the nucleus	0.20248	0.230401	0.213748	0.230675	0.248889	0.249466	0.233844	0.255017
R-HSA-198725	Nuclear Events (kinase and transcription factor activation)	0.125966	0.167343	0.153815	0.154712	0.150584	0.156114	0.164163	0.162188
R-HSA-198745	Signalling to STAT3	0.159081	0.187159	0.163256	0.190899	0.18985	0.208982	0.198513	0.155484
R-HSA-198753	ERK/MAPK targets	0.132211	0.194994	0.165569	0.174159	0.186541	0.194096	0.188126	0.189623
R-HSA-198765	Signalling to ERK5	0.234041	0.267584	0.276489	0.255551	0.249008	0.221245	0.273591	0.262033
R-HSA-198933	Immunoregulatory interactions between a Lymphoid and a non-Lymphoid cell	0.168563	0.164968	0.192291	0.162489	0.218584	0.196795	0.151699	0.213563
R-HSA-1989781	PPARA activates gene expression	0.108253	0.129539	0.128504	0.129015	0.118456	0.131505	0.133692	0.125625
R-HSA-199220	Vitamin B5 (pantothenate) metabolism	0.0730157	0.096411	0.0641082	0.0937299	0.0862424	0.0411761	0.0948833	0.0788655
R-HSA-199920	CREB phosphorylation	0.17193	0.300409	0.251992	0.276966	0.274279	0.288934	0.298135	0.258945
R-HSA-199977	ER to Golgi Anterograde Transport	0.119515	0.11007	0.12413	0.115384	0.113353	0.118534	0.114943	0.118229
R-HSA-199992	trans-Golgi Network Vesicle Budding	0.129534	0.145257	0.14064	0.149512	0.152343	0.143618	0.151418	0.14716
R-HSA-200425	Carnitine metabolism	0.0673807	0.0772914	0.0879686	0.0863441	0.07852	0.101424	0.093157	0.0873059
R-HSA-201451	Signaling by BMP	0.0970974	0.185836	0.123003	0.164944	0.12557	0.16825	0.160941	0.130965
R-HSA-201556	Signaling by ALK	0.172515	0.188104	0.183823	0.182349	0.199649	0.197512	0.18551	0.205918
R-HSA-201688	WNT mediated activation of DVL	0.124355	0.157191	0.148463	0.144196	0.128875	0.145228	0.169347	0.142381
R-HSA-201722	Formation of the beta-catenin:TCF transactivating complex	0.148587	0.174017	0.159883	0.167429	0.148791	0.144453	0.176832	0.178717
R-HSA-202040	G-protein activation	0.099191	0.141233	0.131404	0.142638	0.127785	0.135811	0.152098	0.115251
R-HSA-202131	Metabolism of nitric oxide: NOS3 activation and regulation	0.137749	0.178264	0.158468	0.171643	0.165942	0.167762	0.175107	0.177531
R-HSA-2022090	Assembly of collagen fibrils and other multimeric structures	0.131528	0.1828	0.164068	0.243524	0.12736	0.168067	0.202555	0.104354
R-HSA-2022377	Metabolism of Angiotensinogen to Angiotensins	0.0306884	0.0617983	0.0573814	0.132617	0.0897587	0.0862385	0.0904931	0.0435062
R-HSA-2022854	Keratan sulfate biosynthesis	-0.0172399	0.0647538	0.0132453	0.168023	0.0412972	0.0795545	0.125447	-0.000217752
R-HSA-2022857	Keratan sulfate degradation	0.0548023	0.127855	0.0657186	0.240583	0.130021	0.137172	0.210669	0.0439632
R-HSA-2022870	Chondroitin sulfate biosynthesis	0.0396394	0.11978	-0.0339716	0.154691	0.104998	0.170704	0.150146	-0.00632369
R-HSA-2022923	Dermatan sulfate biosynthesis	-0.0559571	0.09278	0.0336188	0.208808	0.140555	0.193758	0.161029	-0.0555525
R-HSA-2022928	HS-GAG biosynthesis	-0.00783319	0.0911012	0.0849727	0.119348	0.0828082	0.0599624	0.0920656	0.018441
R-HSA-202403	TCR signaling	0.151425	0.16628	0.156729	0.154356	0.178117	0.182867	0.157165	0.193261
R-HSA-2024096	HS-GAG degradation	0.0724886	0.117613	0.123947	0.175414	0.144237	0.118804	0.145437	0.0708835
R-HSA-2024101	CS/DS degradation	0.0806317	0.134964	0.0682286	0.171122	0.170949	0.177326	0.160984	0.0243819
R-HSA-202424	Downstream TCR signaling	0.176615	0.18067	0.178119	0.172157	0.189954	0.192184	0.177026	0.209969
R-HSA-202427	Phosphorylation of CD3 and TCR zeta chains	0.10826	0.146184	0.101284	0.110572	0.214613	0.229026	0.0958813	0.283209
R-HSA-202430	Translocation of ZAP-70 to Immunological synapse	0.134873	0.137824	0.12716	0.110383	0.235099	0.238923	0.0902652	0.35423
R-HSA-202433	Generation of second messenger molecules	0.06471	0.111065	0.0622005	0.0918779	0.131932	0.152425	0.0852256	0.165724
R-HSA-2025928	Calcineurin activates NFAT	0.198739	0.231365	0.17467	0.216169	0.231957	0.208013	0.20447	0.236417
R-HSA-202670	ERKs are inactivated	0.105331	0.173132	0.150787	0.148622	0.159588	0.163472	0.153984	0.175259
R-HSA-2028269	Signaling by Hippo	0.101086	0.165998	0.14248	0.140345	0.118534	0.141234	0.158001	0.126225
R-HSA-2029480	Fcgamma receptor (FCGR) dependent phagocytosis	0.102261	0.127313	0.107358	0.118933	0.143137	0.152743	0.115114	0.143252
R-HSA-2029481	FCGR activation	0.101259	0.100888	0.0959882	0.106519	0.162951	0.169642	0.0821255	0.152285
R-HSA-2029482	Regulation of actin dynamics for phagocytic cup formation	0.116183	0.145229	0.116029	0.129887	0.157877	0.167379	0.127924	0.157895
R-HSA-2029485	Role of phospholipids in phagocytosis	0.0799648	0.0919665	0.0775983	0.106497	0.146779	0.166413	0.0793436	0.139032
R-HSA-2032785	YAP1- and WWTR1 (TAZ)-stimulated gene expression	0.109494	0.156829	0.153312	0.16593	0.114049	0.144229	0.174879	0.126258
R-HSA-203615	eNOS activation	0.143801	0.168944	0.153872	0.159575	0.162926	0.162206	0.165427	0.180393
R-HSA-203641	NOSTRIN mediated eNOS trafficking	0.0901389	0.168033	0.131003	0.153689	0.118836	0.131454	0.154973	0.123129
R-HSA-203754	NOSIP mediated eNOS trafficking	0.0309886	0.0723191	0.00738959	0.0318526	0.021405	0.0119211	0.038316	0.055226
R-HSA-203927	MicroRNA (miRNA) biogenesis	0.179049	0.199528	0.180719	0.190646	0.184131	0.16528	0.195886	0.211337
R-HSA-204005	COPII-mediated vesicle transport	0.0907203	0.0765256	0.0934195	0.0795576	0.082147	0.0914121	0.080393	0.0914425
R-HSA-204174	Regulation of pyruvate dehydrogenase (PDH) complex	0.126145	0.147694	0.167728	0.145531	0.150113	0.0883002	0.182963	0.141738
R-HSA-2046104	alpha-linolenic (omega3) and linoleic (omega6) acid metabolism	0.0513953	0.117044	0.0960441	0.103119	0.151644	0.124704	0.0901655	0.0472315
R-HSA-2046105	Linoleic acid (LA) metabolism	0.0764618	0.143049	0.1266	0.15118	0.161653	0.122528	0.114225	0.0617451
R-HSA-2046106	alpha-linolenic acid (ALA) metabolism	0.0513953	0.117044	0.0960441	0.103119	0.151644	0.124704	0.0901655	0.0472315
R-HSA-204626	Hypusine synthesis from eIF5A-lysine	0.119976	0.145998	0.198444	0.144391	0.11701	0.104834	0.120957	0.167314
R-HSA-204998	Cell death signalling via NRAGE, NRIF and NADE	0.121977	0.158831	0.138088	0.142404	0.143972	0.152355	0.147205	0.144637
R-HSA-205017	NFG and proNGF binds to p75NTR	-0.0298441	0.0421509	0.00301993	0.0849871	0.0958833	-0.0183222	0.149467	-0.0354106
R-HSA-205025	NADE modulates death signalling	0.0565125	0.128361	0.0966957	0.106248	0.0930429	0.0914607	0.115794	0.0831126
R-HSA-205043	NRIF signals cell death from the nucleus	0.179084	0.200143	0.188316	0.199538	0.195117	0.197121	0.200801	0.188895
R-HSA-209543	p75NTR recruits signalling complexes	0.181505	0.189539	0.180257	0.182496	0.202873	0.206076	0.188322	0.193467
R-HSA-209560	NF-kB is activated and signals survival	0.205338	0.22265	0.206114	0.211771	0.228643	0.229847	0.212334	0.221895
R-HSA-209563	Axonal growth stimulation	0.147854	0.187405	0.164813	0.182356	0.165725	0.165447	0.209501	0.166717
R-HSA-209776	Metabolism of amine-derived hormones	-0.0305097	0.0218103	0.0213233	0.0400065	-0.0317828	0.0241761	0.0204175	0.00351914
R-HSA-209822	Glycoprotein hormones	-0.106456	-0.0723749	-0.0106202	0.075804	-0.0193446	0.0412202	-0.0268424	-0.0678119
R-HSA-209905	Catecholamine biosynthesis	0.0706792	0.140758	0.0174827	0.152757	0.0461989	0.114006	0.142402	0.0596393
R-HSA-209931	Serotonin and melatonin biosynthesis	-0.0274291	0.11609	0.0118514	0.0727719	0.00209618	0.0819721	0.077871	0.0451741
R-HSA-209952	Peptide hormone biosynthesis	-0.0440378	-0.0580025	-0.0477958	-0.00899317	-0.0598388	-0.0519859	-0.0320564	-0.0752092
R-HSA-209968	Thyroxine biosynthesis	-0.159072	-0.266657	0.0169892	-0.0776529	-0.198348	-0.165237	-0.17221	-0.159837
R-HSA-210455	Astrocytic Glutamate-Glutamine Uptake And Metabolism	-0.0672558	-0.063673	-0.119507	-0.0137479	-0.00849825	0.0294199	-0.0508701	-0.0806224
R-HSA-210500	Glutamate Neurotransmitter Release Cycle	0.10021	0.0978851	0.0773519	0.0876375	0.0943886	0.0680464	0.083512	0.104194
R-HSA-210744	Regulation of gene expression in late stage (branching morphogenesis) pancreatic bud precursor cells	0.157894	0.185036	0.160604	0.170559	0.174445	0.1813	0.17994	0.188703
R-HSA-210745	Regulation of gene expression in beta cells	0.115421	0.143113	0.135744	0.142465	0.14297	0.146004	0.155254	0.14668
R-HSA-210746	Regulation of gene expression in endocrine-committed (NEUROG3+) progenitor cells	0.150747	0.289144	0.165382	0.227697	0.235458	0.191883	0.269718	0.188273
R-HSA-210747	Regulation of gene expression in early pancreatic precursor cells	-0.0467229	-0.0317408	-0.0397352	-0.0528233	-0.06818	-0.0776798	-0.0326206	-0.0709007
R-HSA-210990	PECAM1 interactions	0.0777734	0.102027	0.0803464	0.0936881	0.128274	0.138128	0.0864235	0.123156
R-HSA-210991	Basigin interactions	0.15578	0.194189	0.209676	0.176633	0.203957	0.219572	0.188433	0.171914
R-HSA-210993	Tie2 Signaling	0.0933332	0.142633	0.0875962	0.111155	0.129663	0.161072	0.116105	0.126395
R-HSA-211000	Gene Silencing by RNA	0.141362	0.148608	0.153692	0.148033	0.147255	0.128129	0.155933	0.173962
R-HSA-211163	AKT-mediated inactivation of FOXO1A	0.195394	0.23455	0.223886	0.237148	0.247998	0.256879	0.243979	0.26736
R-HSA-211728	Regulation of PAK-2p34 activity by PS-GAP/RHG10	0.105199	0.177813	0.0894474	0.145885	0.189547	0.194646	0.17675	0.114519
R-HSA-211733	Regulation of activated PAK-2p34 by proteasome mediated degradation	0.217366	0.233213	0.228177	0.230088	0.228221	0.215839	0.231607	0.227571
R-HSA-211736	Stimulation of the cell death response by PAK-2p34	0.153548	0.203119	0.148235	0.171361	0.211575	0.199785	0.191127	0.178475
R-HSA-211859	Biological oxidations	0.0473516	0.0558021	0.065271	0.073999	0.0564865	0.0527254	0.0628712	0.0430802
R-HSA-211897	Cytochrome P450 - arranged by substrate type	0.0555035	0.0569717	0.0448727	0.0870108	0.0580697	0.0569685	0.066288	0.0357983
R-HSA-211916	Vitamins	-0.260392	-0.360418	-0.225472	-0.264315	-0.349517	-0.314284	-0.389894	-0.303152
R-HSA-211935	Fatty acids	-0.0534631	-0.110488	-0.0513746	-0.0291006	-0.138344	-0.0822816	-0.0727772	-0.0745007
R-HSA-211945	Phase I - Functionalization of compounds	0.0415353	0.0572508	0.0547603	0.0661643	0.0583909	0.0558242	0.064456	0.0467363
R-HSA-211957	Aromatic amines can be N-hydroxylated or N-dealkylated by CYP1A2	0.23054	0.0916694	0.208927	0.149636	0.279563	0.303412	0.113779	0.20371
R-HSA-211958	Miscellaneous substrates	-0.0713883	-0.149221	-0.063947	-0.0461782	-0.104201	-0.0849112	-0.0883566	-0.116216
R-HSA-211976	Endogenous sterols	0.117458	0.142522	0.0979041	0.155951	0.122444	0.124312	0.142383	0.104453
R-HSA-211979	Eicosanoids	-0.00529041	-0.0873296	-0.0529918	0.0140021	-0.0872595	-0.0356434	-0.0629407	-0.0605503
R-HSA-211981	Xenobiotics	0.0618742	0.0776296	0.0984138	0.0902521	0.123449	0.0854308	0.0785944	0.0662399
R-HSA-211994	Sterols are 12-hydroxylated by CYP8B1	-0.162719	0.0545711	-0.484266	0.36792	-0.419427	-0.178039	-0.116843	-0.184333
R-HSA-211999	CYP2E1 reactions	-0.271707	-0.347067	-0.0447762	-0.266403	-0.0193662	-0.19442	-0.271067	-0.379877
R-HSA-2122947	NOTCH1 Intracellular Domain Regulates Transcription	0.17123	0.192227	0.186179	0.184887	0.179001	0.177295	0.194208	0.200475
R-HSA-2122948	Activated NOTCH1 Transmits Signal to the Nucleus	0.180121	0.221677	0.214335	0.21456	0.209892	0.21523	0.213566	0.207184
R-HSA-212300	PRC2 methylates histones and DNA	0.154784	0.18103	0.181795	0.176884	0.153277	0.14909	0.192615	0.194417
R-HSA-212676	Dopamine Neurotransmitter Release Cycle	0.0850774	0.0920289	0.0733184	0.0863642	0.0764034	0.0637453	0.078209	0.0867528
R-HSA-212718	EGFR interacts with phospholipase C-gamma	0.140521	0.178159	0.175394	0.173313	0.194572	0.195144	0.171362	0.177433
R-HSA-2129379	Molecules associated with elastic fibres	0.0553037	0.145531	0.0872719	0.195701	0.102431	0.146035	0.148901	0.0637035
R-HSA-2132295	MHC class II antigen presentation	0.159845	0.171277	0.182126	0.173385	0.194965	0.182812	0.170193	0.178317
R-HSA-2142670	Synthesis of epoxy (EET) and dihydroxyeicosatrienoic acids (DHET)	-0.0357157	0.0362423	0.0148696	0.011334	0.013144	-0.0116153	0.0460825	-0.121245
R-HSA-2142688	Synthesis of 5-eicosatetraenoic acids	0.011243	0.0472267	0.0596011	0.0290689	0.100297	0.0751867	-0.0344618	0.0362644
R-HSA-2142691	Synthesis of Leukotrienes (LT) and Eoxins (EX)	0.0467396	0.0634819	0.0206546	0.0894396	0.0685474	0.100921	0.0328911	0.0375621
R-HSA-2142696	Synthesis of Hepoxilins (HX) and Trioxilins (TrX)	0.193876	0.346815	0.21073	0.266655	0.177757	0.158787	0.21863	0.183497
R-HSA-2142700	Synthesis of Lipoxins (LX)	0.022262	0.0582556	0.0213965	0.0824739	0.103953	0.101235	0.00366351	0.0444401
R-HSA-2142712	Synthesis of 12-eicosatetraenoic acid derivatives	0.0454838	0.0315658	0.116454	0.104389	0.0782109	-0.0183337	0.0596707	0.018801
R-HSA-2142753	Arachidonic acid metabolism	0.0501125	0.0595026	0.0723192	0.0885619	0.0662979	0.0765543	0.0383576	0.0364935
R-HSA-2142770	Synthesis of 15-eicosatetraenoic acid derivatives	0.0425869	0.160297	0.179593	0.151064	0.146608	0.14724	0.112611	0.0702443
R-HSA-2142789	Ubiquinol biosynthesis	0.0751103	0.0607312	0.0507588	0.0227115	0.0599826	0.0929239	0.0183862	0.0298536
R-HSA-2142816	Synthesis of (16-20)-hydroxyeicosatetraenoic acids (HETE)	0.0625909	0.0269003	0.022642	0.122234	0.0213041	0.020873	0.0685918	0.00854174
R-HSA-2142845	Hyaluronan metabolism	0.0801067	0.117311	0.157345	0.101022	0.158005	0.135387	0.0802682	0.0777274
R-HSA-2142850	Hyaluronan biosynthesis and export	-0.245833	-0.190644	0.149752	-0.0874538	-0.064033	-0.119604	-0.105699	-0.242823
R-HSA-2151201	Transcriptional activation of mitochondrial biogenesis	0.15894	0.194361	0.172915	0.182703	0.173008	0.177227	0.194185	0.181135
R-HSA-2151209	Activation of PPARGC1A (PGC-1alpha) by phosphorylation	0.085029	0.102383	0.113323	0.117095	0.0973493	0.117994	0.12327	0.107607
R-HSA-216083	Integrin cell surface interactions	0.197243	0.217248	0.214148	0.228608	0.212622	0.21185	0.218894	0.196247
R-HSA-2160916	Hyaluronan uptake and degradation	0.114334	0.151273	0.158233	0.123432	0.184679	0.164618	0.102665	0.113443
R-HSA-2161517	Abacavir transmembrane transport	-0.0447565	0.0232803	-0.0962919	0.0353414	-0.0352331	-0.0132062	0.0223322	-0.101043
R-HSA-2161522	Abacavir ADME	0.00274205	0.0409176	-0.0451817	0.027208	0.00127871	0.0135412	0.0193907	-0.0585521
R-HSA-2161541	Abacavir metabolism	0.087332	0.0753135	0.0443141	0.0106568	0.0727394	0.0665361	0.0135766	0.0164015
R-HSA-2162123	Synthesis of Prostaglandins (PG) and Thromboxanes (TX)	0.101058	0.103459	0.14288	0.145064	0.103747	0.110561	0.087367	0.0918498
R-HSA-2168880	Scavenging of heme from plasma	0.165053	0.123986	0.139133	0.20683	0.187744	0.200988	0.143297	0.0743081
R-HSA-2172127	DAP12 interactions	0.0789074	0.0893698	0.0698707	0.0827231	0.142224	0.1412	0.0775959	0.139312
R-HSA-217271	FMO oxidises nucleophiles	-0.168338	-0.17814	-0.313278	-0.265825	-0.0783955	-0.165862	-0.158564	-0.225571
R-HSA-2173782	Binding and Uptake of Ligands by Scavenger Receptors	0.135669	0.148966	0.146673	0.172582	0.177983	0.155035	0.154721	0.13949
R-HSA-2173788	Downregulation of TGF-beta receptor signaling	0.171934	0.203683	0.196705	0.194424	0.197408	0.196641	0.201427	0.202674
R-HSA-2173789	TGF-beta receptor signaling activates SMADs	0.172415	0.216417	0.201765	0.208106	0.204282	0.209186	0.2111	0.202738
R-HSA-2173791	TGF-beta receptor signaling in EMT (epithelial to mesenchymal transition)	0.165239	0.188662	0.179488	0.185545	0.174454	0.187854	0.19351	0.182255
R-HSA-2173793	Transcriptional activity of SMAD2/SMAD3:SMAD4 heterotrimer	0.174601	0.209031	0.191568	0.193388	0.188498	0.193636	0.196655	0.209816
R-HSA-2173795	Downregulation of SMAD2/3:SMAD4 transcriptional activity	0.151641	0.203276	0.171701	0.189255	0.173143	0.185187	0.191853	0.189054
R-HSA-2173796	SMAD2/SMAD3:SMAD4 heterotrimer regulates transcription	0.18389	0.217941	0.202442	0.203024	0.199876	0.206166	0.204682	0.221957
R-HSA-2179392	EGFR Transactivation by Gastrin	0.147029	0.175629	0.168579	0.17438	0.184871	0.179558	0.172224	0.17182
R-HSA-2187335	The retinoid cycle in cones (daylight vision)	-0.0720813	-0.0333374	0.0322519	0.0711449	-0.0509629	0.00214272	0.0312988	-0.126175
R-HSA-2187338	Visual phototransduction	0.0808495	0.096738	0.0944718	0.126052	0.0849497	0.0731682	0.116141	0.0650771
R-HSA-2197563	NOTCH2 intracellular domain regulates transcription	0.206903	0.212974	0.165262	0.190849	0.221821	0.243753	0.192873	0.228698
R-HSA-2214320	Anchoring fibril formation	0.222915	0.230005	0.258985	0.278126	0.227584	0.237231	0.250108	0.188979
R-HSA-2243919	Crosslinking of collagen fibrils	0.180963	0.242949	0.194906	0.314429	0.17989	0.200487	0.25826	0.136328
R-HSA-2299718	Condensation of Prophase Chromosomes	0.130733	0.14451	0.169711	0.135359	0.137686	0.115909	0.149662	0.175254
R-HSA-2393930	Phosphate bond hydrolysis by NUDT proteins	0.124561	0.0765375	0.143518	0.0924924	0.114946	0.0095804	0.0837882	0.120881
R-HSA-2395516	Electron transport from NADPH to Ferredoxin	0.22266	0.0155495	0.190336	0.0679345	0.0930484	-0.0663172	0.031823	0.123695
R-HSA-2404192	Signaling by Type 1 Insulin-like Growth Factor 1 Receptor (IGF1R)	0.0741947	0.100907	0.0808464	0.108236	0.100143	0.120652	0.101657	0.0957169
R-HSA-2408508	Metabolism of ingested SeMet, Sec, MeSec into H2Se	0.00155296	0.100227	0.0292869	0.0996309	0.0800038	-0.000437641	0.105574	0.0455164
R-HSA-2408522	Selenoamino acid metabolism	0.248869	0.272569	0.253623	0.265451	0.259337	0.252655	0.266581	0.263441
R-HSA-2408550	Metabolism of ingested H2SeO4 and H2SeO3 into H2Se	0.274621	0.258366	0.270632	0.320626	0.293713	0.325972	0.243275	0.185884
R-HSA-2408552	Methylation of MeSeH for excretion	-0.18597	-0.0242859	-0.169619	-0.142336	-0.199049	-0.100801	-0.129008	-0.17238
R-HSA-2408557	Selenocysteine synthesis	0.342161	0.359163	0.341399	0.356532	0.348961	0.34591	0.360409	0.354968
R-HSA-2424491	DAP12 signaling	0.0838673	0.0948873	0.0736269	0.0880356	0.138367	0.14026	0.0818254	0.144543
R-HSA-2426168	Activation of gene expression by SREBF (SREBP)	0.14827	0.168931	0.162138	0.159021	0.161661	0.174803	0.159377	0.164338
R-HSA-2428924	IGF1R signaling cascade	0.07574	0.102026	0.0817837	0.107447	0.101453	0.122042	0.102794	0.0970026
R-HSA-2428928	IRS-related events triggered by IGF1R	0.0757348	0.101146	0.0807456	0.106554	0.100235	0.121188	0.101781	0.0959536
R-HSA-2428933	SHC-related events triggered by IGF1R	0.164201	0.217521	0.174461	0.20116	0.21109	0.21416	0.200753	0.189842
R-HSA-2453902	The canonical retinoid cycle in rods (twilight vision)	0.0546052	0.0299282	0.0603232	0.0635538	0.00823869	0.0260803	0.0520122	-0.0199593
R-HSA-2465910	MASTL Facilitates Mitotic Progression	0.126467	0.178963	0.194606	0.159464	0.165874	0.142147	0.173704	0.204791
R-HSA-2467813	Separation of Sister Chromatids	0.161361	0.172358	0.191227	0.162134	0.170273	0.155461	0.170365	0.189125
R-HSA-2468052	Establishment of Sister Chromatid Cohesion	0.136419	0.138877	0.228901	0.137174	0.166959	0.165561	0.159024	0.200355
R-HSA-2470946	Cohesin Loading onto Chromatin	0.142701	0.178102	0.223752	0.178573	0.172146	0.186851	0.200493	0.20231
R-HSA-2473224	Antagonism of Activin by Follistatin	-0.035022	-0.0279507	0.0357598	0.123928	0.00832037	0.0917902	0.050586	-0.0344376
R-HSA-2485179	Activation of the phototransduction cascade	0.101324	0.0586297	0.0466448	0.088703	0.0588217	0.0701144	0.082782	0.06132
R-HSA-2500257	Resolution of Sister Chromatid Cohesion	0.130364	0.149849	0.168445	0.134945	0.145994	0.131879	0.147684	0.170924
R-HSA-2514853	Condensation of Prometaphase Chromosomes	0.139754	0.191757	0.212157	0.176342	0.190233	0.144386	0.181871	0.217768
R-HSA-2514856	The phototransduction cascade	0.10638	0.094328	0.0805861	0.123927	0.0908623	0.0804658	0.122323	0.0994534
R-HSA-2514859	Inactivation, recovery and regulation of the phototransduction cascade	0.109368	0.0958362	0.0830607	0.126388	0.092919	0.0826022	0.12487	0.101847
R-HSA-2534343	Interaction With Cumulus Cells And The Zona Pellucida	-0.120395	-0.195732	-0.12578	-0.183004	-0.159351	-0.0168154	-0.213404	-0.161893
R-HSA-2559580	Oxidative Stress Induced Senescence	0.187049	0.211249	0.199977	0.199278	0.197121	0.201094	0.207981	0.213854
R-HSA-2559582	Senescence-Associated Secretory Phenotype (SASP)	0.152731	0.170577	0.172195	0.165136	0.168291	0.16536	0.167967	0.177846
R-HSA-2559584	Formation of Senescence-Associated Heterochromatin Foci (SAHF)	0.192193	0.190037	0.204215	0.181501	0.193537	0.198384	0.195594	0.20697
R-HSA-2559585	Oncogene Induced Senescence	0.20034	0.224801	0.210326	0.211077	0.21154	0.213696	0.215539	0.224185
R-HSA-2559586	DNA Damage/Telomere Stress Induced Senescence	0.15559	0.152775	0.159946	0.146373	0.152422	0.146471	0.15903	0.171482
R-HSA-2562578	TRIF-mediated programmed cell death	0.179819	0.185972	0.163039	0.127612	0.213689	0.230816	0.118203	0.193924
R-HSA-2564830	Cytosolic iron-sulfur cluster assembly	0.0643398	0.0892445	0.0788752	0.0568962	0.0623183	0.0329276	0.0662074	0.05049
R-HSA-2586552	Signaling by Leptin	0.128033	0.17529	0.140657	0.169322	0.161299	0.188543	0.170437	0.146763
R-HSA-264642	Acetylcholine Neurotransmitter Release Cycle	0.109356	0.0997961	0.0833419	0.08944	0.0978922	0.0740896	0.0856044	0.112679
R-HSA-264870	Caspase-mediated cleavage of cytoskeletal proteins	0.105083	0.112055	0.112366	0.104628	0.10944	0.108152	0.105191	0.113589
R-HSA-264876	Insulin processing	0.0998018	0.0933346	0.0908339	0.098379	0.0939779	0.0716871	0.0929026	0.106523
R-HSA-2672351	Stimuli-sensing channels	0.157821	0.182916	0.185658	0.173881	0.193437	0.173973	0.174172	0.179944
R-HSA-2682334	EPH-Ephrin signaling	0.0983827	0.135614	0.129601	0.129954	0.13939	0.142126	0.131344	0.132106
R-HSA-2730905	Role of LAT2/NTAL/LAB on calcium mobilization	0.133168	0.140555	0.127696	0.154237	0.196614	0.201211	0.137671	0.173635
R-HSA-2855086	Ficolins bind to repetitive carbohydrate structures on the target cell surface	-0.167318	-0.0240661	-0.134546	0.189133	0.154612	0.0623136	0.15704	-0.225522
R-HSA-2871796	FCERI mediated MAPK activation	0.106654	0.13896	0.107198	0.124364	0.150322	0.157298	0.115265	0.142517
R-HSA-2871809	FCERI mediated Ca+2 mobilization	0.0836685	0.0865535	0.0571612	0.0900749	0.129212	0.139226	0.066247	0.118816
R-HSA-2871837	FCERI mediated NF-kB activation	0.190017	0.188928	0.19448	0.18417	0.202729	0.201824	0.185287	0.208558
R-HSA-2892245	POU5F1 (OCT4), SOX2, NANOG repress genes related to differentiation	0.152185	0.188199	0.186551	0.178065	0.142472	0.123864	0.188952	0.18861
R-HSA-2892247	POU5F1 (OCT4), SOX2, NANOG activate genes related to proliferation	0.148548	0.170187	0.160416	0.180447	0.159367	0.180801	0.183012	0.15519
R-HSA-2979096	NOTCH2 Activation and Transmission of Signal to the Nucleus	0.188304	0.224025	0.208043	0.222668	0.206422	0.210918	0.22428	0.204224
R-HSA-2980736	Peptide hormone metabolism	0.0904991	0.103427	0.0975374	0.112955	0.103283	0.0888056	0.102897	0.100939
R-HSA-2980766	Nuclear Envelope Breakdown	0.119573	0.139293	0.157417	0.137498	0.152997	0.136739	0.140892	0.165078
R-HSA-2980767	Activation of NIMA Kinases NEK9, NEK6, NEK7	0.104402	0.141872	0.187014	0.126552	0.157197	0.142135	0.136052	0.181866
R-HSA-2995383	Initiation of Nuclear Envelope (NE) Reformation	0.148591	0.185709	0.198406	0.162808	0.186638	0.173328	0.173486	0.204905
R-HSA-2995410	Nuclear Envelope (NE) Reassembly	0.152959	0.179222	0.192628	0.168964	0.179976	0.16983	0.174998	0.197691
R-HSA-3000157	Laminin interactions	0.0977896	0.242144	0.181682	0.220533	0.121056	0.189087	0.240171	0.110029
R-HSA-3000170	Syndecan interactions	0.111524	0.174395	0.135119	0.206555	0.150346	0.148406	0.191212	0.105146
R-HSA-3000171	Non-integrin membrane-ECM interactions	0.0889876	0.15984	0.119816	0.188231	0.119537	0.135692	0.180505	0.0832881
R-HSA-3000178	ECM proteoglycans	0.131716	0.177111	0.151749	0.200067	0.169048	0.175639	0.191928	0.144842
R-HSA-3000471	Scavenging by Class B Receptors	0.109583	0.167783	0.176555	0.173598	0.209059	0.172154	0.15374	0.12931
R-HSA-3000480	Scavenging by Class A Receptors	0.139615	0.162638	0.157172	0.19945	0.18311	0.151092	0.178025	0.136894
R-HSA-3000484	Scavenging by Class F Receptors	0.122506	0.136858	0.152055	0.13865	0.159918	0.144969	0.136151	0.157791
R-HSA-3000497	Scavenging by Class H Receptors	0.242806	0.36435	0.121922	0.324267	0.333275	0.277619	0.294718	0.207167
R-HSA-3065676	SUMO is conjugated to E1 (UBA2:SAE1)	0.0904045	0.128133	0.117788	0.11183	0.127918	0.125838	0.128894	0.1483
R-HSA-3065678	SUMO is transferred from E1 to E2 (UBE2I, UBC9)	0.0972638	0.120346	0.122988	0.113074	0.115034	0.123202	0.128341	0.148213
R-HSA-3065679	SUMO is proteolytically processed	0.106507	0.143737	0.132941	0.129235	0.140339	0.142602	0.14399	0.156755
R-HSA-3108214	SUMOylation of DNA damage response and repair proteins	0.122259	0.144206	0.14142	0.13999	0.138077	0.132363	0.150427	0.160279
R-HSA-3134963	DEx/H-box helicases activate type I IFN and inflammatory cytokines production	0.228403	0.239007	0.223406	0.213824	0.256551	0.264056	0.219288	0.242086
R-HSA-3134973	LRR FLII-interacting protein 1 (LRRFIP1) activates type I IFN production	0.119974	0.193705	0.1498	0.173649	0.161201	0.192958	0.171432	0.151521
R-HSA-3134975	Regulation of innate immune responses to cytosolic DNA	0.198318	0.225776	0.202407	0.212803	0.203868	0.22419	0.211548	0.218789
R-HSA-3214815	HDACs deacetylate histones	0.133009	0.160704	0.156711	0.158982	0.143447	0.146996	0.168807	0.171432
R-HSA-3214841	PKMTs methylate histone lysines	0.163259	0.187706	0.172373	0.175117	0.171737	0.171854	0.186308	0.199405
R-HSA-3214842	HDMs demethylate histones	0.107962	0.132242	0.144528	0.13515	0.120851	0.118481	0.139423	0.156242
R-HSA-3214847	HATs acetylate histones	0.122125	0.128277	0.11102	0.120776	0.113294	0.115884	0.133326	0.142701
R-HSA-3214858	RMTs methylate histone arginines	0.158069	0.1723	0.168204	0.166599	0.154335	0.154461	0.176735	0.192249
R-HSA-3215018	Processing and activation of SUMO	0.0991838	0.121461	0.123431	0.114658	0.112987	0.123807	0.128624	0.141039
R-HSA-3232118	SUMOylation of transcription factors	0.158358	0.180362	0.164376	0.174066	0.175424	0.177674	0.184296	0.180695
R-HSA-3232142	SUMOylation of ubiquitinylation proteins	0.114749	0.133709	0.13292	0.1201	0.126775	0.119064	0.128684	0.143586
R-HSA-3238698	WNT ligand biogenesis and trafficking	-0.00277304	0.00843335	0.0675989	0.0962194	-0.0110224	-0.0206731	0.0413041	-0.0467843
R-HSA-3249367	STAT6-mediated induction of chemokines	0.1764	0.193464	0.200758	0.173218	0.193266	0.232638	0.165939	0.219262
R-HSA-3270619	IRF3-mediated induction of type I IFN	0.168474	0.196089	0.185835	0.181367	0.187246	0.198267	0.176357	0.190019
R-HSA-3295583	TRP channels	0.0939983	0.0916895	0.0605399	0.0443743	0.134151	0.132559	0.0323635	0.118365
R-HSA-3296197	Hydroxycarboxylic acid-binding receptors	-0.438291	-0.416932	0.0210113	-0.408635	0.0692082	0.308737	-0.460794	-0.297078
R-HSA-3299685	Detoxification of Reactive Oxygen Species	0.13947	0.148794	0.143071	0.144728	0.155997	0.149405	0.14219	0.148414
R-HSA-3301854	Nuclear Pore Complex (NPC) Disassembly	0.124479	0.147495	0.194291	0.145716	0.172346	0.143203	0.144217	0.193704
R-HSA-3322077	Glycogen synthesis	0.212742	0.244321	0.221559	0.24028	0.22421	0.230077	0.243695	0.227439
R-HSA-3371378	Regulation by c-FLIP	0.0712496	0.0938928	0.0756738	0.0795611	0.0837438	0.0968561	0.0745013	0.101699
R-HSA-3371453	Regulation of HSF1-mediated heat shock response	0.108323	0.141945	0.12914	0.126828	0.12963	0.127562	0.131752	0.135072
R-HSA-3371497	HSP90 chaperone cycle for steroid hormone receptors (SHR) in the presence of ligand	0.135839	0.1621	0.149249	0.146515	0.160565	0.16489	0.159523	0.167138
R-HSA-3371511	HSF1 activation	0.113676	0.143469	0.135924	0.124782	0.134052	0.130985	0.132379	0.140119
R-HSA-3371556	Cellular response to heat stress	0.120743	0.145589	0.133687	0.129262	0.137605	0.136944	0.1339	0.143802
R-HSA-3371568	Attenuation phase	0.1254	0.130965	0.128463	0.118191	0.143657	0.146741	0.128151	0.151886
R-HSA-3371571	HSF1-dependent transactivation	0.132192	0.139785	0.134458	0.12681	0.149814	0.149233	0.135678	0.154665
R-HSA-349425	Autodegradation of the E3 ubiquitin ligase COP1	0.209409	0.228925	0.226664	0.225487	0.221725	0.217398	0.228684	0.227566
R-HSA-350054	Notch-HLH transcription pathway	0.157687	0.198547	0.172151	0.193467	0.176975	0.180826	0.205241	0.198867
R-HSA-350562	Regulation of ornithine decarboxylase (ODC)	0.217911	0.219758	0.238821	0.221701	0.221245	0.199087	0.220976	0.226165
R-HSA-350864	Regulation of thyroid hormone activity	-0.037934	0.0300624	-0.249289	0.434982	-0.155208	-0.0362873	0.209285	-0.198764
R-HSA-351143	Agmatine biosynthesis	-0.247847	-0.295513	-0.284211	-0.334985	-0.296879	-0.295868	-0.361925	-0.251473
R-HSA-351200	Interconversion of polyamines	0.119825	0.147034	0.165185	0.113497	0.109426	0.0521722	0.114252	0.104706
R-HSA-351202	Metabolism of polyamines	0.203216	0.205906	0.226475	0.204425	0.201566	0.17464	0.204673	0.207542
R-HSA-351906	Apoptotic cleavage of cell adhesion proteins	0.0879377	0.181116	0.164019	0.155026	0.145704	0.170174	0.151934	0.12993
R-HSA-352230	Amino acid transport across the plasma membrane	0.0608195	0.0215973	0.03515	0.0732662	0.080047	0.0649815	0.0357852	0.0410795
R-HSA-352238	Breakdown of the nuclear lamina	0.0792222	0.0772556	0.0872272	0.0777218	0.076994	0.0553162	0.0848584	0.077936
R-HSA-354192	Integrin signaling	0.108759	0.162913	0.127446	0.143366	0.168829	0.183266	0.132689	0.158133
R-HSA-354194	GRB2:SOS provides linkage to MAPK signaling for Integrins	0.108038	0.206724	0.14292	0.150151	0.184675	0.198251	0.138212	0.155043
R-HSA-372708	p130Cas linkage to MAPK signaling for integrins	0.0998373	0.17974	0.123211	0.141991	0.162047	0.177109	0.122644	0.146315
R-HSA-373080	Class B/2 (Secretin family receptors)	-0.00147142	0.0596755	0.0281862	0.0911182	0.0327638	0.0736227	0.0619921	-0.0104289
R-HSA-373752	Netrin-1 signaling	0.0808495	0.135085	0.101149	0.119429	0.128264	0.148914	0.109414	0.117704
R-HSA-373753	Nephrin family interactions	0.0643126	0.115643	0.0799592	0.108621	0.110024	0.118991	0.109337	0.105196
R-HSA-373755	Semaphorin interactions	0.113734	0.159002	0.135589	0.137347	0.1647	0.160927	0.140437	0.152893
R-HSA-373756	SDK interactions	-0.087056	-0.278765	-0.288099	0.000949356	-0.307708	-0.302994	-0.139266	-0.2805
R-HSA-375165	NCAM signaling for neurite out-growth	0.0962001	0.145612	0.109279	0.141891	0.143041	0.158779	0.140049	0.141038
R-HSA-375276	Peptide ligand-binding receptors	0.0891033	0.110422	0.108648	0.118646	0.128655	0.127868	0.108	0.105496
R-HSA-375280	Amine ligand-binding receptors	0.023709	0.0505911	0.0287474	0.0697071	0.0621197	0.0894447	0.084497	0.0638487
R-HSA-375281	Hormone ligand-binding receptors	-0.0633933	-0.121069	-0.0148383	-0.0607171	-0.0584552	-0.0403067	-0.022414	-0.0413405
R-HSA-376172	DSCAM interactions	-0.000371718	0.0128417	0.0395191	-0.0132324	0.00130123	0.00255559	0.0152306	0.0270585
R-HSA-3769402	Deactivation of the beta-catenin transactivating complex	0.152417	0.204817	0.171292	0.189469	0.171224	0.186218	0.196185	0.184109
R-HSA-3772470	Negative regulation of TCF-dependent signaling by WNT ligand antagonists	-0.0690336	0.0193987	-0.00181895	0.12467	-0.0519	0.0340078	0.0583693	-0.0744689
R-HSA-379397	Enzymatic degradation of dopamine by COMT	0.0396843	0.0300318	0.0508402	0.0392462	0.0268242	0.0348692	0.0228899	-0.000252218
R-HSA-379398	Enzymatic degradation of Dopamine by monoamine oxidase	0.0429534	0.0343606	0.0566688	0.0442652	0.0330151	0.0406089	0.0271019	0.0053774
R-HSA-379401	Dopamine clearance from the synaptic cleft	0.0170446	0.0234215	0.0421005	0.0388541	0.0190253	0.0177989	0.0226433	-0.0207902
R-HSA-379716	Cytosolic tRNA aminoacylation	0.117072	0.128586	0.116331	0.10883	0.110428	0.102514	0.111196	0.127658
R-HSA-379724	tRNA Aminoacylation	0.0805416	0.0953474	0.0903269	0.0834707	0.0832438	0.0711479	0.0813046	0.0950116
R-HSA-379726	Mitochondrial tRNA aminoacylation	0.0328687	0.0524705	0.0503473	0.0439845	0.0459479	0.0256658	0.0355982	0.047954
R-HSA-380095	Tachykinin receptors bind tachykinins	0.0530675	0.0550994	0.00500568	0.00483216	-0.0449759	-0.196895	-0.0322018	-0.00404372
R-HSA-380108	Chemokine receptors bind chemokines	0.0731644	0.0592903	0.0957204	0.073344	0.177286	0.153396	0.0224725	0.13391
R-HSA-380259	Loss of Nlp from mitotic centrosomes	0.118036	0.157742	0.153608	0.139275	0.148596	0.143429	0.154038	0.159127
R-HSA-380270	Recruitment of mitotic centrosome proteins and complexes	0.117941	0.156018	0.152314	0.138382	0.147078	0.142073	0.15321	0.158316
R-HSA-380284	Loss of proteins required for interphase microtubule organization from the centrosome	0.118036	0.157742	0.153608	0.139275	0.148596	0.143429	0.154038	0.159127
R-HSA-380287	Centrosome maturation	0.117941	0.156018	0.152314	0.138382	0.147078	0.142073	0.15321	0.158316
R-HSA-380320	Recruitment of NuMA to mitotic centrosomes	0.117098	0.156714	0.153812	0.140495	0.146534	0.141233	0.154954	0.157228
R-HSA-380612	Metabolism of serotonin	-0.156896	0.123018	0.145102	-0.0111915	0.0282809	-0.110444	0.108994	-0.185368
R-HSA-380615	Serotonin clearance from the synaptic cleft	-0.210726	-0.019048	0.0563712	0.00428573	-0.0843064	-0.137265	0.0283654	-0.133602
R-HSA-380972	Energy dependent regulation of mTOR by LKB1-AMPK	0.13289	0.144062	0.148534	0.147826	0.135879	0.151175	0.157152	0.146501
R-HSA-380994	ATF4 activates genes in response to endoplasmic reticulum stress	0.132686	0.147133	0.130752	0.162343	0.152232	0.148933	0.157595	0.14622
R-HSA-381033	ATF6 (ATF6-alpha) activates chaperones	0.159994	0.160283	0.163688	0.171643	0.177759	0.173997	0.161578	0.172376
R-HSA-381038	XBP1(S) activates chaperone genes	0.12328	0.126247	0.11645	0.120957	0.111689	0.121388	0.121447	0.117768
R-HSA-381042	PERK regulates gene expression	0.160122	0.16789	0.158716	0.186288	0.1813	0.186725	0.181947	0.174394
R-HSA-381070	IRE1alpha activates chaperones	0.126481	0.128437	0.11975	0.124562	0.11613	0.126033	0.124361	0.122042
R-HSA-381183	ATF6 (ATF6-alpha) activates chaperone genes	0.160892	0.160694	0.164921	0.171642	0.179218	0.175604	0.161279	0.17366
R-HSA-381340	Transcriptional regulation of white adipocyte differentiation	0.146529	0.164531	0.161242	0.158932	0.163845	0.168769	0.15345	0.168941
R-HSA-381676	Glucagon-like Peptide-1 (GLP1) regulates insulin secretion	0.12506	0.179144	0.155967	0.165074	0.169099	0.172194	0.186173	0.166611
R-HSA-381753	Olfactory Signaling Pathway	0.0270231	0.0138008	0.0585428	0.0186545	0.020882	0.00637819	0.0160321	-0.00323336
R-HSA-381771	Synthesis, secretion, and inactivation of Glucagon-like Peptide-1 (GLP-1)	0.0750076	0.129416	0.114717	0.125398	0.120215	0.119675	0.1153	0.103217
R-HSA-383280	Nuclear Receptor transcription pathway	0.217419	0.260626	0.250246	0.250693	0.237421	0.236572	0.257471	0.249863
R-HSA-3858494	Beta-catenin independent WNT signaling	0.157436	0.19025	0.170575	0.183561	0.175405	0.179401	0.18682	0.175673
R-HSA-388479	Vasopressin-like receptors	-0.129552	0.000283637	-0.0960208	-0.0136313	-0.158878	-0.0401113	0.0604695	-0.10486
R-HSA-388841	Costimulation by the CD28 family	0.15069	0.168468	0.15304	0.154816	0.178341	0.180104	0.157331	0.18581
R-HSA-388844	Receptor-type tyrosine-protein phosphatases	0.0437328	0.0660919	0.094561	0.116863	0.0256341	0.0871255	0.141066	0.00193369
R-HSA-389356	CD28 co-stimulation	0.157042	0.174558	0.160864	0.162587	0.181886	0.182734	0.165686	0.186706
R-HSA-389357	CD28 dependent PI3K/Akt signaling	0.188643	0.201245	0.19187	0.189588	0.20702	0.20204	0.192958	0.219459
R-HSA-389359	CD28 dependent Vav1 pathway	0.10999	0.153099	0.115491	0.131885	0.190901	0.185747	0.130132	0.191787
R-HSA-389397	Orexin and neuropeptides FF and QRFP bind to their respective receptors	-0.0217908	0.146755	-0.200322	-0.0293015	-0.0411725	-0.00340761	-0.15577	-0.12989
R-HSA-389513	CTLA4 inhibitory signaling	0.106176	0.137487	0.117792	0.122078	0.163523	0.170899	0.121122	0.172398
R-HSA-389542	NADPH regeneration	0.28081	0.316032	0.199703	0.266886	0.306125	0.273597	0.245306	0.242476
R-HSA-389599	Alpha-oxidation of phytanate	-0.0270169	-0.0143911	-0.0318213	-0.0567413	-0.0244731	-0.061019	-0.0250292	0.0293355
R-HSA-389661	Glyoxylate metabolism and glycine degradation	0.0655362	0.0641359	0.108969	0.0638163	0.0995249	0.0592427	0.0577054	0.0893075
R-HSA-389887	Beta-oxidation of pristanoyl-CoA	0.0185704	-0.0275376	-0.00776458	-0.0247735	0.0342655	0.0229803	-0.0180775	-0.052076
R-HSA-3899300	SUMOylation of transcription cofactors	0.139193	0.176723	0.146497	0.168939	0.15622	0.162415	0.180242	0.179637
R-HSA-389948	PD-1 signaling	0.0845872	0.104594	0.0599872	0.0773725	0.175125	0.19278	0.0681396	0.196408
R-HSA-389957	Prefoldin mediated transfer of substrate to CCT/TriC	0.183388	0.206821	0.207634	0.197752	0.192866	0.182403	0.211988	0.204355
R-HSA-389958	Cooperation of Prefoldin and TriC/CCT in actin and tubulin folding	0.178178	0.203509	0.203586	0.196073	0.190661	0.177437	0.210093	0.199668
R-HSA-389960	Formation of tubulin folding intermediates by CCT/TriC	0.147975	0.19893	0.198435	0.196082	0.184355	0.168297	0.208042	0.198373
R-HSA-389977	Post-chaperonin tubulin folding pathway	0.201675	0.234599	0.240625	0.248137	0.208969	0.20064	0.247009	0.223316
R-HSA-390247	Beta-oxidation of very long chain fatty acids	0.0550063	0.0401201	0.0274895	0.0378294	0.037409	0.0366541	0.0532087	0.0355595
R-HSA-390450	Folding of actin by CCT/TriC	0.148475	0.171631	0.156591	0.164148	0.16355	0.156453	0.19072	0.172261
R-HSA-390466	Chaperonin-mediated protein folding	0.178822	0.199866	0.195112	0.191017	0.195917	0.20173	0.202566	0.192286
R-HSA-390471	Association of TriC/CCT with target proteins during biosynthesis	0.169236	0.19282	0.188164	0.183835	0.191254	0.200031	0.195986	0.18552
R-HSA-390522	Striated Muscle Contraction	0.068322	0.0855965	0.0819176	0.0899953	0.0764866	0.081367	0.0980825	0.0850382
R-HSA-390648	Muscarinic acetylcholine receptors	0.114017	0.114668	0.0680154	0.108385	0.211874	0.243724	0.112288	0.263615
R-HSA-390650	Histamine receptors	-0.411346	-0.0860237	-0.115749	-0.0264263	-0.0648775	0.106953	0.169987	-0.299212
R-HSA-390651	Dopamine receptors	-0.135066	-0.0611206	-0.115337	-0.081274	-0.0814738	-0.0934919	-0.0619754	-0.0584474
R-HSA-390666	Serotonin receptors	-0.0796322	0.0664227	-0.0286241	0.106661	-0.0544533	0.00278105	0.0989491	-3.51e-05
R-HSA-390696	Adrenoceptors	0.114425	0.0770579	0.0813476	0.103239	0.129714	0.157895	0.113729	0.138645
R-HSA-390918	Peroxisomal lipid metabolism	0.0445222	0.0292447	0.0191671	0.0213993	0.0255281	0.0154987	0.0383228	0.0306347
R-HSA-391160	Signal regulatory protein family interactions	0.0525761	0.0887961	0.0306589	0.0453064	0.138747	0.166637	0.022308	0.112668
R-HSA-391251	Protein folding	0.178293	0.199341	0.194442	0.19026	0.194481	0.200214	0.20188	0.192407
R-HSA-391903	Eicosanoid ligand-binding receptors	-0.0237689	0.00606251	0.0212188	0.0386245	-0.00432794	0.0266166	0.0614707	0.0078832
R-HSA-391906	Leukotriene receptors	-0.096046	-0.0696574	-0.0557404	-0.230468	-0.0718735	-0.072588	-0.188826	-0.104079
R-HSA-391908	Prostanoid ligand receptors	-0.185776	-0.160242	-0.193209	0.0122527	-0.0973114	-0.097376	0.0213504	-0.157921
R-HSA-392023	Adrenaline signalling through Alpha-2 adrenergic receptor	-0.0429023	-0.0697298	-0.189511	0.159924	-0.0782459	0.0916385	0.19842	-0.155119
R-HSA-392154	Nitric oxide stimulates guanylate cyclase	-0.00967688	0.0467434	-0.0446269	0.0484829	0.0019439	0.0113446	0.0871764	-0.00920276
R-HSA-392170	ADP signalling through P2Y purinoceptor 12	0.16029	0.172081	0.186357	0.187971	0.182348	0.185908	0.193447	0.173705
R-HSA-392451	G beta:gamma signalling through PI3Kgamma	0.170481	0.192777	0.195226	0.202208	0.203832	0.223257	0.212084	0.21826
R-HSA-392517	Rap1 signalling	0.13971	0.195174	0.172454	0.176153	0.169448	0.175147	0.196851	0.176098
R-HSA-392518	Signal amplification	0.141387	0.179222	0.172235	0.175181	0.187322	0.198341	0.174261	0.165749
R-HSA-392851	Prostacyclin signalling through prostacyclin receptor	0.148388	0.161068	0.165531	0.172133	0.178445	0.177038	0.179709	0.164608
R-HSA-3928662	EPHB-mediated forward signaling	0.116693	0.161147	0.137646	0.14643	0.164785	0.170734	0.144226	0.149686
R-HSA-3928663	EPHA-mediated growth cone collapse	0.0889144	0.131676	0.131623	0.129596	0.144683	0.157931	0.127558	0.130373
R-HSA-3928664	Ephrin signaling	0.0865502	0.118715	0.112572	0.113778	0.124328	0.119173	0.117631	0.125126
R-HSA-3928665	EPH-ephrin mediated repulsion of cells	0.110479	0.139061	0.139348	0.139594	0.166548	0.167951	0.136159	0.146179
R-HSA-397014	Muscle contraction	0.0779735	0.117248	0.0950995	0.124886	0.106026	0.115432	0.137624	0.0950999
R-HSA-397795	G-protein beta:gamma signalling	0.148579	0.178679	0.160951	0.167843	0.183465	0.193178	0.173355	0.1853
R-HSA-399710	Activation of AMPA receptors	-0.102055	-0.0872475	-0.030263	-0.0241231	-0.0714592	-0.20011	-0.0596469	-0.0637557
R-HSA-399719	Trafficking of AMPA receptors	0.0963359	0.11673	0.102319	0.115833	0.0984287	0.0867615	0.124641	0.114631
R-HSA-399721	Glutamate binding, activation of AMPA receptors and synaptic plasticity	0.0963359	0.11673	0.102319	0.115833	0.0984287	0.0867615	0.124641	0.114631
R-HSA-399954	Sema3A PAK dependent Axon repulsion	0.109878	0.14602	0.120306	0.123839	0.159306	0.160606	0.128487	0.153393
R-HSA-399955	SEMA3A-Plexin repulsion signaling by inhibiting Integrin adhesion	0.128571	0.178681	0.150321	0.152279	0.205542	0.195569	0.152162	0.18042
R-HSA-399956	CRMPs in Sema3A signaling	0.109125	0.169352	0.142652	0.146956	0.169412	0.146128	0.142438	0.158546
R-HSA-399997	Acetylcholine regulates insulin secretion	0.0633028	0.108093	0.0668715	0.122187	0.0969081	0.0698493	0.121441	0.0667136
R-HSA-400042	Adrenaline,noradrenaline inhibits insulin secretion	0.122696	0.129977	0.135842	0.176037	0.139269	0.164577	0.20121	0.124654
R-HSA-400206	Regulation of lipid metabolism by PPARalpha	0.109282	0.130832	0.129231	0.129909	0.119797	0.13271	0.134548	0.127045
R-HSA-400253	Circadian Clock	0.164799	0.189673	0.174816	0.179368	0.173464	0.180022	0.192446	0.182877
R-HSA-400451	Free fatty acids regulate insulin secretion	-0.0836329	0.12693	0.0865943	0.0453633	0.127821	0.122546	0.0415968	0.0193747
R-HSA-400508	Incretin synthesis, secretion, and inactivation	0.0739771	0.123083	0.107712	0.123435	0.116674	0.118174	0.112744	0.0993
R-HSA-400511	Synthesis, secretion, and inactivation of Glucose-dependent Insulinotropic Polypeptide (GIP)	0.0717966	0.0683484	0.0924888	0.0864455	0.106618	0.0803166	0.0736008	0.0857211
R-HSA-400685	Sema4D in semaphorin signaling	0.14326	0.194057	0.185054	0.169295	0.194833	0.207211	0.177151	0.188576
R-HSA-4085001	Sialic acid metabolism	0.0561392	0.059671	0.0360292	0.0533371	0.0647481	0.0581846	0.0187136	0.0336809
R-HSA-4085377	SUMOylation of SUMOylation proteins	0.102537	0.120592	0.133304	0.115694	0.124483	0.118669	0.120902	0.154995
R-HSA-4086398	Ca2+ pathway	0.133934	0.18247	0.143921	0.179273	0.157981	0.166602	0.179693	0.151287
R-HSA-4086400	PCP/CE pathway	0.160064	0.184265	0.17133	0.18043	0.174572	0.172642	0.183057	0.171562
R-HSA-4090294	SUMOylation of intracellular receptors	0.193512	0.227165	0.213813	0.217188	0.209626	0.205902	0.229876	0.228234
R-HSA-416482	G alpha (12/13) signalling events	0.117501	0.16201	0.142925	0.139716	0.147074	0.154905	0.149201	0.136493
R-HSA-416550	Sema4D mediated inhibition of cell attachment and migration	0.123823	0.171807	0.146604	0.139325	0.179342	0.192647	0.154458	0.1708
R-HSA-416572	Sema4D induced cell migration and growth-cone collapse	0.155759	0.210699	0.213789	0.197425	0.195793	0.212109	0.200299	0.197121
R-HSA-416700	Other semaphorin interactions	0.0498097	0.12714	0.0760616	0.125938	0.173725	0.162655	0.108776	0.117613
R-HSA-416993	Trafficking of GluR2-containing AMPA receptors	0.0711038	0.0819521	0.0721142	0.0908794	0.067473	0.0556489	0.0972948	0.0849652
R-HSA-417957	P2Y receptors	0.0955513	0.080744	0.131762	0.111662	0.149542	0.112211	0.0859758	0.0940519
R-HSA-417973	Adenosine P1 receptors	-0.0671357	-0.117971	-0.099425	-0.12881	-0.108313	-0.0918362	-0.142142	-0.132522
R-HSA-418038	Nucleotide-like (purinergic) receptors	0.0305739	0.00550931	0.0433716	0.0213801	0.0537403	0.0332007	-0.00277498	0.00672152
R-HSA-418217	G beta:gamma signalling through PLC beta	0.125387	0.14817	0.156858	0.153141	0.157366	0.155486	0.166692	0.141039
R-HSA-418346	Platelet homeostasis	0.0862444	0.112448	0.0791862	0.10246	0.106085	0.127393	0.113101	0.0975646
R-HSA-418359	Reduction of cytosolic Ca++ levels	0.159438	0.198125	0.152195	0.197796	0.179427	0.171108	0.203547	0.163588
R-HSA-418360	Platelet calcium homeostasis	0.111652	0.124042	0.085374	0.111163	0.115367	0.131373	0.114071	0.112328
R-HSA-418457	cGMP effects	-0.10765	-0.00161489	-0.191385	0.0496798	-0.0666115	-0.0180281	0.154427	-0.146708
R-HSA-418555	G alpha (s) signalling events	0.0641806	0.13084	0.100392	0.124249	0.118846	0.130228	0.131996	0.0981188
R-HSA-418592	ADP signalling through P2Y purinoceptor 1	0.115767	0.158882	0.161024	0.161319	0.170907	0.183559	0.161083	0.14691
R-HSA-418597	G alpha (z) signalling events	0.117116	0.116998	0.101777	0.134904	0.139026	0.135232	0.132126	0.130589
R-HSA-418885	DCC mediated attractive signaling	0.112754	0.189645	0.153213	0.144451	0.189709	0.199957	0.136741	0.170758
R-HSA-418886	Netrin mediated repulsion signals	0.0799524	0.172097	0.127017	0.12401	0.136695	0.171911	0.119668	0.127406
R-HSA-418889	Caspase activation via Dependence Receptors in the absence of ligand	0.108025	0.138779	0.131992	0.11436	0.124356	0.126597	0.122663	0.140296
R-HSA-418890	Role of second messengers in netrin-1 signaling	0.0213417	0.0930663	0.0359637	0.0970242	0.102485	0.125026	0.0833816	0.087168
R-HSA-418990	Adherens junctions interactions	0.0940862	0.127036	0.113232	0.12854	0.105808	0.12239	0.129477	0.110293
R-HSA-419037	NCAM1 interactions	0.0294523	0.0708396	0.0207912	0.13921	0.0370644	0.0939922	0.145914	0.0278327
R-HSA-419408	Lysosphingolipid and LPA receptors	-0.0171489	0.045666	-0.0403075	0.0596185	-0.00845019	0.0315849	-0.0284719	0.00409953
R-HSA-419771	Opsins	0.144003	-0.0341574	0.00434106	0.00888788	-0.00423104	0.0248488	-0.00495026	-0.048982
R-HSA-419812	Calcitonin-like ligand receptors	0.0223902	0.194459	0.000109259	0.122106	0.0175752	0.057015	0.0594483	-0.0851487
R-HSA-420029	Tight junction interactions	0.0766267	0.0828128	0.114382	0.0832465	0.0847733	0.0879941	0.0799614	0.0903913
R-HSA-420092	Glucagon-type ligand receptors	0.0966613	0.121257	0.111564	0.137877	0.122814	0.145259	0.135823	0.102459
R-HSA-420499	Class C/3 (Metabotropic glutamate/pheromone receptors)	-0.135962	-0.135211	-0.143404	-0.150258	-0.164466	-0.166766	-0.132727	-0.169769
R-HSA-420597	Nectin/Necl trans heterodimerization	0.0858665	0.0259473	0.102159	0.0403712	0.0606991	0.0399242	0.0248852	0.0769835
R-HSA-421270	Cell-cell junction organization	0.0895144	0.115438	0.11192	0.117771	0.0997352	0.114699	0.116787	0.10463
R-HSA-422085	Synthesis, secretion, and deacylation of Ghrelin	0.12041	0.156285	0.130679	0.160477	0.164526	0.140537	0.146539	0.0890542
R-HSA-422356	Regulation of insulin secretion	0.100568	0.135794	0.111897	0.130695	0.131124	0.123824	0.139894	0.120517
R-HSA-425366	Transport of bile salts and organic acids, metal ions and amine compounds	0.0884679	0.0561761	0.0748663	0.0654836	0.0803297	0.0623007	0.0433716	0.0625638
R-HSA-425381	Bicarbonate transporters	0.05536	-0.0411835	0.0168617	-0.0340178	0.0617912	0.0288362	-0.00357779	0.0742408
R-HSA-425393	Transport of inorganic cations/anions and amino acids/oligopeptides	0.0302763	0.00989586	0.0205803	0.0383697	0.0637971	0.0411699	0.0131942	0.0221457
R-HSA-425397	Transport of vitamins, nucleosides, and related molecules	0.0619595	0.0551339	0.0665215	0.0688396	0.0745089	0.092365	0.0449687	0.0271336
R-HSA-425407	SLC-mediated transmembrane transport	0.070661	0.0452652	0.059242	0.0544895	0.0803956	0.0614209	0.0380111	0.0476184
R-HSA-425410	Metal ion SLC transporters	0.0859968	0.0309592	0.0472292	0.0396888	0.0791289	0.0577673	0.0165351	0.0550213
R-HSA-425561	Sodium/Calcium exchangers	0.0597036	0.181383	0.111436	0.150455	0.175901	0.104331	0.156475	0.122501
R-HSA-425986	Sodium/Proton exchangers	-0.0575527	-0.0826047	-0.107854	-0.058718	0.00745936	-0.0503918	-0.0738563	-0.0424322
R-HSA-426048	Arachidonate production from DAG	0.0976991	0.172464	0.134413	0.0208789	0.161033	0.0290041	0.0269494	0.0515264
R-HSA-426117	Cation-coupled Chloride cotransporters	0.0916188	0.170044	0.110845	0.0390071	0.156169	0.179673	0.0129526	0.0886184
R-HSA-426486	Small interfering RNA (siRNA) biogenesis	0.147149	0.213433	0.171892	0.186779	0.179898	0.161147	0.208328	0.178642
R-HSA-426496	Post-transcriptional silencing by small RNAs	0.209633	0.241995	0.212873	0.230006	0.23303	0.220081	0.252134	0.219741
R-HSA-427359	SIRT1 negatively regulates rRNA expression	0.12952	0.150402	0.142891	0.141169	0.127944	0.119183	0.155791	0.157764
R-HSA-427389	ERCC6 (CSB) and EHMT2 (G9a) positively regulate rRNA expression	0.15555	0.178393	0.171485	0.177343	0.157816	0.155623	0.188555	0.194064
R-HSA-427413	NoRC negatively regulates rRNA expression	0.156915	0.167481	0.170782	0.168416	0.149909	0.145395	0.173565	0.192111
R-HSA-427589	Type II Na+/Pi cotransporters	-0.0512851	-0.0031446	0.056553	0.106995	-0.054512	0.101618	0.0182272	-0.0980025
R-HSA-427601	Multifunctional anion exchangers	0.0348868	-0.0477671	-0.0517734	-0.0252794	0.00240261	0.0656003	-0.0448954	-0.047337
R-HSA-427652	Sodium-coupled phosphate cotransporters	0.0682166	0.0722276	0.144383	0.11288	0.0499303	0.164193	0.0652991	0.0437372
R-HSA-427975	Proton/oligopeptide cotransporters	-0.00596083	-0.0929718	-0.00538364	-0.0469889	0.0886811	0.0800309	-0.0342639	-0.0443311
R-HSA-428157	Sphingolipid metabolism	0.0878537	0.100533	0.0944675	0.109769	0.112131	0.111757	0.0888667	0.0818954
R-HSA-428359	Insulin-like Growth Factor-2 mRNA Binding Proteins (IGF2BPs/IMPs/VICKZs) bind RNA	0.26346	0.243712	0.26437	0.271938	0.218497	0.241714	0.282017	0.261742
R-HSA-428540	Activation of RAC1	0.0646466	0.113292	0.0716363	0.0895115	0.109333	0.109612	0.0886159	0.103649
R-HSA-428542	Regulation of commissural axon pathfinding by SLIT and ROBO	0.0632598	0.175615	0.134557	0.127221	0.131902	0.157782	0.131229	0.111864
R-HSA-428543	Inactivation of CDC42 and RAC1	0.141964	0.189204	0.154338	0.164315	0.215302	0.218013	0.156753	0.189531
R-HSA-428559	Proton-coupled neutral amino acid transporters	0.00609272	0.190528	0.168511	0.19438	0.242102	0.151872	0.152226	0.0501844
R-HSA-428643	Organic anion transporters	-0.0746499	-0.116826	-0.00677762	-0.0764697	-0.0517228	-0.0904757	-0.103432	-0.0789232
R-HSA-428890	Role of ABL in ROBO-SLIT signaling	0.152728	0.197797	0.173265	0.216503	0.215234	0.217382	0.224311	0.176239
R-HSA-428930	Thromboxane signalling through TP receptor	0.133245	0.171604	0.164141	0.16704	0.173276	0.1777	0.167665	0.153951
R-HSA-429593	Inositol transporters	0.280705	0.237286	0.25608	0.33534	0.2706	0.204287	0.315655	0.330349
R-HSA-429914	Deadenylation-dependent mRNA decay	0.200107	0.225041	0.204976	0.216422	0.20823	0.203346	0.229395	0.226703
R-HSA-429947	Deadenylation of mRNA	0.244051	0.282924	0.244925	0.263309	0.245539	0.254465	0.281575	0.270713
R-HSA-429958	mRNA decay by 3' to 5' exoribonuclease	0.0944514	0.105406	0.10405	0.115761	0.10753	0.100071	0.126626	0.115616
R-HSA-430039	mRNA decay by 5' to 3' exoribonuclease	0.250666	0.28147	0.272883	0.277256	0.275	0.252362	0.283045	0.291741
R-HSA-430116	GP1b-IX-V activation signalling	0.154639	0.204921	0.17459	0.186646	0.179784	0.18432	0.196751	0.173526
R-HSA-432030	Transport of glycerol from adipocytes to the liver by Aquaporins	-0.167728	-0.0733931	-0.185521	0.00342818	-0.0189679	0.0791592	-0.00791313	-0.170972
R-HSA-432040	Vasopressin regulates renal water homeostasis via Aquaporins	0.102165	0.147705	0.13167	0.1574	0.156573	0.142106	0.16378	0.138434
R-HSA-432047	Passive transport by Aquaporins	0.0994103	0.0943603	0.0796809	0.106883	0.114397	0.104781	0.0903531	0.0679017
R-HSA-432142	Platelet sensitization by LDL	0.0980458	0.123643	0.102504	0.108321	0.124877	0.151676	0.11238	0.118807
R-HSA-432720	Lysosome Vesicle Biogenesis	0.12464	0.140618	0.138907	0.147677	0.15081	0.138779	0.150976	0.143947
R-HSA-432722	Golgi Associated Vesicle Biogenesis	0.162706	0.173953	0.163581	0.176614	0.177299	0.172428	0.17244	0.172504
R-HSA-433137	Sodium-coupled sulphate, di- and tri-carboxylate transporters	0.0759835	0.0685794	0.0767411	0.104648	-0.00329852	0.0195833	0.0590478	-0.00771085
R-HSA-433692	Proton-coupled monocarboxylate transport	0.19603	0.14311	0.203911	0.141336	0.236915	0.234847	0.112972	0.229966
R-HSA-434313	Intracellular metabolism of fatty acids regulates insulin secretion	-0.000407768	0.127002	0.146618	0.097698	0.17158	0.148217	0.0818598	0.0403051
R-HSA-434316	Fatty Acids bound to GPR40 (FFAR1) regulate insulin secretion	-0.18445	0.0970238	-0.000473214	-0.0336435	0.0547596	0.06987	-0.0193894	-0.0249374
R-HSA-435354	Zinc transporters	0.110958	0.035173	0.0561089	0.0518161	0.0841255	0.0565832	0.0295768	0.0663683
R-HSA-435368	Zinc efflux and compartmentalization by the SLC30 family	0.116749	0.0328947	0.0515651	0.0445833	0.0955697	0.0522072	0.0243033	0.0706652
R-HSA-437239	Recycling pathway of L1	0.141543	0.179992	0.165554	0.173971	0.185034	0.175521	0.174169	0.174348
R-HSA-438066	Unblocking of NMDA receptors, glutamate binding and activation	0.0646173	0.0769296	0.0766275	0.0821695	0.0595676	0.0614944	0.0814609	0.0744649
R-HSA-4411364	Binding of TCF/LEF:CTNNB1 to target gene promoters	0.149901	0.20723	0.193411	0.18951	0.176178	0.176456	0.193481	0.188718
R-HSA-4419969	Depolymerization of the Nuclear Lamina	0.129128	0.137318	0.14172	0.150256	0.153301	0.128766	0.151562	0.15522
R-HSA-442380	Zinc influx into cells by the SLC39 gene family	0.0974688	0.052498	0.0969714	0.0970739	0.0313574	0.0564036	0.0570431	0.0530184
R-HSA-442660	Na+/Cl- dependent neurotransmitter transporters	-0.0848411	-0.0962875	-0.062246	-0.0456882	-0.0414669	-0.029589	-0.0763217	-0.0771629
R-HSA-442720	CREB1 phosphorylation through the activation of Adenylate Cyclase	0.121074	0.17055	0.163725	0.172899	0.185045	0.160735	0.193765	0.178311
R-HSA-442729	CREB1 phosphorylation through the activation of CaMKII/CaMKK/CaMKIV cascasde	0.139916	0.20099	0.171896	0.191118	0.165626	0.165896	0.191901	0.179834
R-HSA-442742	CREB1 phosphorylation through NMDA receptor-mediated activation of RAS signaling	0.0917639	0.124257	0.118379	0.116704	0.1149	0.113237	0.114504	0.119735
R-HSA-442982	Ras activation upon Ca2+ influx through NMDA receptor	0.077844	0.100028	0.0929959	0.0939299	0.084063	0.0810631	0.0890743	0.091546
R-HSA-444209	Free fatty acid receptors	0.143986	0.0848775	0.138613	0.115581	0.143338	0.115174	0.0687519	0.119949
R-HSA-444257	RSK activation	0.125335	0.180831	0.176444	0.171047	0.193348	0.183808	0.173581	0.190883
R-HSA-444411	Rhesus glycoproteins mediate ammonium transport.	0.0753538	0.0997944	0.203139	0.1597	0.125074	0.132992	0.115554	0.0639412
R-HSA-444473	Formyl peptide receptors bind formyl peptides and many other ligands	0.150158	0.176494	0.172108	0.186561	0.190522	0.181905	0.186837	0.17378
R-HSA-444821	Relaxin receptors	-0.218891	-0.130793	-0.154346	-0.220943	-0.259735	-0.211761	-0.222918	-0.119067
R-HSA-445095	Interaction between L1 and Ankyrins	0.0937572	0.0869607	0.0811776	0.0965604	0.0862355	0.0864709	0.105237	0.0671975
R-HSA-445144	Signal transduction by L1	0.148223	0.198017	0.178115	0.179801	0.204219	0.198393	0.179761	0.193231
R-HSA-445355	Smooth Muscle Contraction	0.11453	0.174369	0.108964	0.179147	0.150887	0.163331	0.198909	0.13073
R-HSA-445717	Aquaporin-mediated transport	0.113035	0.139656	0.12951	0.146952	0.149167	0.136726	0.153072	0.126773
R-HSA-446107	Type I hemidesmosome assembly	0.150124	0.189398	0.231862	0.139199	0.140418	0.146258	0.15463	0.180194
R-HSA-446193	Biosynthesis of the N-glycan precursor (dolichol lipid-linked oligosaccharide, LLO) and transfer to a nascent protein	0.109232	0.0587054	0.063556	0.070026	0.0620978	0.0538112	0.0424367	0.0494155
R-HSA-446199	Synthesis of Dolichyl-phosphate	0.0103009	-0.110145	-0.0741591	-0.0385314	-0.111122	-0.0551894	-0.103077	-0.11241
R-HSA-446205	Synthesis of GDP-mannose	0.176325	0.0169893	0.0617477	0.103594	0.0389151	0.0759379	0.0715587	0.0833443
R-HSA-446210	Synthesis of UDP-N-acetyl-glucosamine	0.136344	0.054148	0.0915319	0.174677	0.0951728	0.176122	0.105445	0.0723026
R-HSA-446219	Synthesis of substrates in N-glycan biosythesis	0.0993738	0.0509304	0.0554295	0.0622075	0.060765	0.0591204	0.0300882	0.0507455
R-HSA-446343	Localization of the PINCH-ILK-PARVIN complex to focal adhesions	0.177084	0.24898	0.21064	0.220109	0.22537	0.219539	0.24465	0.208335
R-HSA-446353	Cell-extracellular matrix interactions	0.127816	0.177329	0.150645	0.159355	0.156676	0.158814	0.180041	0.145117
R-HSA-446388	Regulation of cytoskeletal remodeling and cell spreading by IPP complex components	0.0876814	0.115263	0.0623208	0.0945682	0.0921135	0.0814793	0.121858	0.0830453
R-HSA-446728	Cell junction organization	0.0989973	0.132599	0.126638	0.123643	0.115259	0.124569	0.128225	0.116917
R-HSA-447038	NrCAM interactions	-0.0214018	0.0460332	0.074047	0.0303578	0.000981499	0.00794584	0.0526668	0.0278498
R-HSA-447041	CHL1 interactions	0.164516	0.226028	0.176131	0.209907	0.214819	0.226127	0.213247	0.189969
R-HSA-447043	Neurofascin interactions	0.0985674	0.110114	0.122393	0.119309	0.109118	0.0988412	0.124651	0.113283
R-HSA-447115	Interleukin-12 family signaling	0.171665	0.179175	0.178395	0.17503	0.196389	0.190307	0.177886	0.18924
R-HSA-448424	Interleukin-17 signaling	0.165159	0.189845	0.180366	0.181035	0.18311	0.187424	0.182958	0.1881
R-HSA-448706	Interleukin-1 processing	0.193758	0.203073	0.223276	0.191446	0.241635	0.257629	0.178128	0.225597
R-HSA-449836	Other interleukin signaling	0.108094	0.10139	0.0967868	0.104319	0.110098	0.0951985	0.0920243	0.111684
R-HSA-450282	MAPK targets/ Nuclear events mediated by MAP kinases	0.146276	0.20375	0.178489	0.188906	0.187983	0.195629	0.197971	0.19248
R-HSA-450294	MAP kinase activation	0.168122	0.194118	0.183144	0.178667	0.190247	0.193399	0.185588	0.195991
R-HSA-450302	activated TAK1 mediates p38 MAPK activation	0.201782	0.206326	0.202014	0.197346	0.217259	0.227315	0.198993	0.214965
R-HSA-450321	JNK (c-Jun kinases) phosphorylation and activation mediated by activated human TAK1	0.203789	0.20775	0.201419	0.19718	0.215237	0.224917	0.199024	0.216795
R-HSA-450341	Activation of the AP-1 family of transcription factors	0.14498	0.201081	0.175519	0.185481	0.186994	0.192503	0.186158	0.190853
R-HSA-450385	Butyrate Response Factor 1 (BRF1) binds and destabilizes mRNA	0.12442	0.182215	0.153665	0.163812	0.155849	0.17734	0.18276	0.162403
R-HSA-450408	AUF1 (hnRNP D0) binds and destabilizes mRNA	0.203353	0.210167	0.206538	0.209415	0.211263	0.202946	0.212295	0.217897
R-HSA-450513	Tristetraprolin (TTP, ZFP36) binds and destabilizes mRNA	0.107969	0.174556	0.142935	0.156048	0.138928	0.162977	0.177394	0.139066
R-HSA-450520	HuR (ELAVL1) binds and stabilizes mRNA	0.116495	0.144146	0.123483	0.157751	0.150283	0.130513	0.155343	0.145955
R-HSA-450604	KSRP (KHSRP) binds and destabilizes mRNA	0.129403	0.177827	0.150907	0.156858	0.160736	0.175068	0.174231	0.163186
R-HSA-451306	Ionotropic activity of kainate receptors	0.000887156	0.0376585	0.0944304	0.0481404	0.0224939	0.0265178	0.0636828	0.0542072
R-HSA-451307	Activation of Na-permeable kainate receptors	-0.443392	-0.433219	-0.481848	-0.243445	-0.524468	-0.397744	-0.385423	-0.49528
R-HSA-451308	Activation of Ca-permeable Kainate Receptor	0.000887156	0.0376585	0.0944304	0.0481404	0.0224939	0.0265178	0.0636828	0.0542072
R-HSA-451326	Activation of kainate receptors upon glutamate binding	0.0593041	0.0897169	0.124101	0.097552	0.087215	0.0871482	0.111979	0.0957689
R-HSA-451927	Interleukin-2 family signaling	0.106825	0.151944	0.106014	0.124221	0.157813	0.166564	0.125292	0.162534
R-HSA-452723	Transcriptional regulation of pluripotent stem cells	0.130919	0.171229	0.147904	0.171333	0.139597	0.158604	0.176253	0.141986
R-HSA-453276	Regulation of mitotic cell cycle	0.161169	0.16589	0.184602	0.159325	0.17135	0.154359	0.168946	0.188331
R-HSA-4551638	SUMOylation of chromatin organization proteins	0.111318	0.14374	0.128218	0.136099	0.123119	0.119179	0.148606	0.151614
R-HSA-456926	Thrombin signalling through proteinase activated receptors (PARs)	0.119306	0.182788	0.170954	0.177206	0.177801	0.17838	0.169873	0.178245
R-HSA-4570464	SUMOylation of RNA binding proteins	0.126746	0.158786	0.15168	0.151415	0.144515	0.149252	0.159185	0.169394
R-HSA-4608870	Asymmetric localization of PCP proteins	0.17463	0.203736	0.192396	0.199857	0.182034	0.183262	0.204119	0.184403
R-HSA-4615885	SUMOylation of DNA replication proteins	0.14289	0.153357	0.182968	0.156045	0.170244	0.145649	0.161797	0.19005
R-HSA-4641257	Degradation of AXIN	0.193746	0.21456	0.208916	0.20792	0.2011	0.188653	0.208777	0.206821
R-HSA-4641258	Degradation of DVL	0.206236	0.220949	0.219674	0.21402	0.211325	0.203222	0.220643	0.224332
R-HSA-4641262	Disassembly of the destruction complex and recruitment of AXIN to the membrane	0.101728	0.166508	0.135186	0.152101	0.132052	0.151746	0.15324	0.135466
R-HSA-4641263	Regulation of FZD by ubiquitination	0.185821	0.246558	0.206316	0.242217	0.210474	0.221337	0.233525	0.201943
R-HSA-4641265	Repression of WNT target genes	0.13806	0.165616	0.141618	0.16295	0.144234	0.158198	0.166617	0.173767
R-HSA-4655427	SUMOylation of DNA methylation proteins	0.151736	0.174807	0.160727	0.167566	0.151984	0.16925	0.180143	0.187591
R-HSA-4755510	SUMOylation of immune response proteins	0.186274	0.200422	0.195387	0.189515	0.200636	0.20241	0.195639	0.221247
R-HSA-480985	Synthesis of dolichyl-phosphate-glucose	0.137269	0.151182	0.128454	0.0808628	0.110331	0.0539371	0.0631706	0.149728
R-HSA-499943	Interconversion of nucleotide di- and triphosphates	0.171427	0.200072	0.206829	0.194139	0.206142	0.179611	0.199988	0.193791
R-HSA-500657	Presynaptic function of Kainate receptors	0.115211	0.140223	0.15148	0.144299	0.150111	0.145724	0.157855	0.133671
R-HSA-500753	Pyrimidine biosynthesis	0.0260021	-0.00132798	0.0196436	0.0332402	0.000557988	-0.0224195	0.060854	0.00197801
R-HSA-5099900	WNT5A-dependent internalization of FZD4	0.128196	0.159979	0.131847	0.165106	0.15102	0.149156	0.171654	0.142831
R-HSA-512988	Interleukin-3, Interleukin-5 and GM-CSF signaling	0.118021	0.160604	0.128685	0.141781	0.163493	0.167644	0.145891	0.155981
R-HSA-5140745	WNT5A-dependent internalization of FZD2, FZD5 and ROR2	0.104324	0.137107	0.108609	0.151423	0.147887	0.143254	0.152122	0.132578
R-HSA-5173105	O-linked glycosylation	-0.0509302	0.00288502	-0.0104025	0.0269867	-0.0310024	0.0150738	0.00529831	-0.0531607
R-HSA-5173214	O-glycosylation of TSR domain-containing proteins	-0.143415	-0.0196013	-0.186373	0.046447	-0.106983	-0.021507	0.023736	-0.187016
R-HSA-5205647	Mitophagy	0.195719	0.202227	0.200006	0.207396	0.203804	0.205642	0.208171	0.205411
R-HSA-5205685	PINK1-PRKN Mediated Mitophagy	0.199709	0.201165	0.203307	0.212216	0.207246	0.209177	0.208713	0.207425
R-HSA-5213460	RIPK1-mediated regulated necrosis	0.125744	0.143227	0.139012	0.138405	0.140717	0.139085	0.137252	0.14214
R-HSA-5218900	CASP8 activity is inhibited	0.0712496	0.0938928	0.0756738	0.0795611	0.0837438	0.0968561	0.0745013	0.101699
R-HSA-5218920	VEGFR2 mediated vascular permeability	0.166007	0.1958	0.177158	0.179257	0.183417	0.184295	0.18384	0.193211
R-HSA-5218921	VEGFR2 mediated cell proliferation	0.108474	0.140497	0.114955	0.136151	0.147331	0.150575	0.133228	0.124256
R-HSA-5221030	TET1,2,3 and TDG demethylate DNA	0.241973	0.28694	0.236557	0.308166	0.267289	0.2572	0.313709	0.220488
R-HSA-5223345	Miscellaneous transport and binding events	0.143971	0.101486	0.133069	0.100831	0.137957	0.112653	0.0864396	0.114528
R-HSA-5250913	Positive epigenetic regulation of rRNA expression	0.155303	0.171662	0.162432	0.167025	0.150863	0.150586	0.174719	0.184893
R-HSA-5250924	B-WICH complex positively regulates rRNA expression	0.154467	0.160863	0.155749	0.157014	0.142932	0.137618	0.16443	0.173927
R-HSA-5250941	Negative epigenetic regulation of rRNA expression	0.147253	0.161414	0.159095	0.159203	0.143629	0.141983	0.165593	0.181572
R-HSA-525793	Myogenesis	0.116375	0.168181	0.148354	0.169103	0.148861	0.163987	0.176337	0.143681
R-HSA-5263617	Metabolism of ingested MeSeO2H into MeSeH	0.426069	0.457007	0.417845	0.427893	0.351481	0.441403	0.434451	0.301828
R-HSA-532668	N-glycan trimming in the ER and Calnexin/Calreticulin cycle	0.204309	0.195922	0.194308	0.195483	0.207155	0.203198	0.193252	0.199123
R-HSA-5334118	DNA methylation	0.150252	0.162492	0.177844	0.160295	0.143853	0.12072	0.174123	0.185141
R-HSA-5357769	Caspase activation via extrinsic apoptotic signalling pathway	0.0798278	0.102726	0.0890676	0.0818376	0.0948793	0.108218	0.0791677	0.106898
R-HSA-5357786	TNFR1-induced proapoptotic signaling	0.0917766	0.104764	0.0988801	0.0931858	0.0970385	0.103775	0.0902867	0.109076
R-HSA-5357956	TNFR1-induced NF-kappa-B signaling pathway	0.138922	0.146202	0.142255	0.138108	0.142247	0.145982	0.13974	0.152353
R-HSA-5358346	Hedgehog ligand biogenesis	0.20455	0.202491	0.206666	0.205341	0.202972	0.195851	0.200962	0.208641
R-HSA-5358493	Synthesis of diphthamide-EEF2	0.0310633	0.0453644	-0.0207302	0.0231837	0.0495558	0.0254624	0.041598	0.0168084
R-HSA-5358508	Mismatch Repair	0.130543	0.130754	0.16242	0.128835	0.133562	0.0958279	0.139136	0.143581
R-HSA-5358565	Mismatch repair (MMR) directed by MSH2:MSH6 (MutSalpha)	0.130543	0.130754	0.16242	0.128835	0.133562	0.0958279	0.139136	0.143581
R-HSA-5358606	Mismatch repair (MMR) directed by MSH2:MSH3 (MutSbeta)	0.127996	0.12751	0.159624	0.125381	0.13188	0.0931802	0.135815	0.141292
R-HSA-5362517	Signaling by Retinoic Acid	0.0850791	0.108806	0.153847	0.139539	0.111531	0.100855	0.123762	0.112463
R-HSA-5362798	Release of Hh-Np from the secreting cell	-0.000543802	0.0257206	0.0382379	0.0963666	0.0115508	0.0516349	0.0636431	-0.000194412
R-HSA-5365859	RA biosynthesis pathway	-0.0718201	-0.0803535	0.0480282	0.0165748	-0.0945547	-0.0888341	-0.0586323	-0.0828607
R-HSA-5368286	Mitochondrial translation initiation	0.211681	0.171651	0.20778	0.186754	0.183834	0.122923	0.195564	0.191257
R-HSA-5368287	Mitochondrial translation	0.197078	0.162078	0.20036	0.17336	0.170239	0.111641	0.183909	0.179754
R-HSA-5368598	Negative regulation of TCF-dependent signaling by DVL-interacting proteins	0.109155	0.123303	0.115909	0.111706	0.0888756	0.113304	0.14021	0.118056
R-HSA-5389840	Mitochondrial translation elongation	0.242689	0.197936	0.24196	0.207387	0.192642	0.132989	0.221168	0.220745
R-HSA-5419276	Mitochondrial translation termination	0.244704	0.200548	0.240477	0.211101	0.198713	0.140702	0.223326	0.224404
R-HSA-5423646	Aflatoxin activation and detoxification	0.089535	0.0664287	0.0569149	0.116739	0.0534531	0.0383708	0.0743771	0.0022058
R-HSA-549127	Organic cation transport	0.0290326	0.0143769	-0.00378947	0.0474442	0.0214875	0.00996727	0.0399714	-0.0233279
R-HSA-549132	Organic cation/anion/zwitterion transport	0.0160313	0.00382169	-0.0137276	0.0341935	0.0105702	-0.00308476	0.0304186	-0.0344624
R-HSA-5576886	Phase 4 - resting membrane potential	0.0312899	0.066083	0.0967966	0.0846961	0.0588824	0.0833052	0.072512	0.0272921
R-HSA-5576890	Phase 3 - rapid repolarisation	-0.0411654	-0.0306663	-0.0504953	0.0394796	0.025739	0.0792401	0.0486349	-0.0596065
R-HSA-5576891	Cardiac conduction	0.0638074	0.105106	0.0970141	0.117031	0.0962744	0.108607	0.125764	0.0837351
R-HSA-5576892	Phase 0 - rapid depolarisation	0.0797933	0.105899	0.0761414	0.102439	0.112329	0.0815352	0.106028	0.0777307
R-HSA-5576893	Phase 2 - plateau phase	0.018439	0.0522441	0.0345593	0.10655	0.0717997	0.106947	0.118386	0.0337859
R-HSA-5576894	Phase 1 - inactivation of fast Na+ channels	-0.0487933	0.0234874	-0.0253853	0.0721217	-0.0187189	0.0597717	0.043801	-0.032364
R-HSA-5578749	Transcriptional regulation by small RNAs	0.162788	0.170106	0.174681	0.168213	0.166862	0.145716	0.174737	0.196934
R-HSA-5578768	Physiological factors	0.122045	0.188318	0.163065	0.201612	0.138923	0.160024	0.20221	0.133829
R-HSA-5578775	Ion homeostasis	0.0782581	0.121129	0.116729	0.127357	0.123308	0.125791	0.143576	0.117341
R-HSA-5601884	PIWI-interacting RNA (piRNA) biogenesis	0.132939	0.131309	0.135464	0.140999	0.139086	0.125297	0.145468	0.16369
R-HSA-5607761	Dectin-1 mediated noncanonical NF-kB signaling	0.223584	0.231634	0.236468	0.22704	0.234586	0.220909	0.231053	0.24234
R-HSA-5607763	CLEC7A (Dectin-1) induces NFAT activation	0.181672	0.228467	0.160485	0.215271	0.225352	0.233876	0.195773	0.236732
R-HSA-5607764	CLEC7A (Dectin-1) signaling	0.184582	0.189739	0.202208	0.185768	0.202224	0.201985	0.186166	0.214811
R-HSA-561048	Organic anion transport	-0.418682	-0.525174	-0.527824	-0.461328	-0.520537	-0.461991	-0.534448	-0.511014
R-HSA-5610780	Degradation of GLI1 by the proteasome	0.169227	0.18235	0.182765	0.182419	0.18246	0.168349	0.188175	0.191412
R-HSA-5610783	Degradation of GLI2 by the proteasome	0.167555	0.183846	0.179848	0.181366	0.178144	0.164541	0.189521	0.189482
R-HSA-5610785	GLI3 is processed to GLI3R by the proteasome	0.16654	0.182707	0.178719	0.180441	0.177121	0.163605	0.188583	0.188419
R-HSA-5610787	Hedgehog 'off' state	0.148052	0.166668	0.164225	0.166105	0.157988	0.149968	0.17373	0.170449
R-HSA-5617472	Activation of anterior HOX genes in hindbrain development during early embryogenesis	0.122392	0.147954	0.137795	0.146671	0.130305	0.137418	0.151011	0.148434
R-HSA-5619507	Activation of HOX genes during differentiation	0.122392	0.147954	0.137795	0.146671	0.130305	0.137418	0.151011	0.148434
R-HSA-5620912	Anchoring of the basal body to the plasma membrane	0.118081	0.153794	0.148887	0.135612	0.144087	0.137354	0.149432	0.154881
R-HSA-5620916	VxPx cargo-targeting to cilium	0.102755	0.122593	0.110027	0.126022	0.111785	0.0925116	0.127381	0.122186
R-HSA-5620920	Cargo trafficking to the periciliary membrane	0.0973951	0.118645	0.108426	0.11749	0.114082	0.0937428	0.113841	0.11302
R-HSA-5620922	BBSome-mediated cargo-targeting to cilium	0.105177	0.138161	0.133928	0.133199	0.125465	0.111527	0.14081	0.131934
R-HSA-5620924	Intraflagellar transport	0.160781	0.177259	0.181867	0.18859	0.160147	0.164312	0.190366	0.158144
R-HSA-5620971	Pyroptosis	0.193854	0.201587	0.215514	0.191183	0.219922	0.218905	0.196924	0.212972
R-HSA-5621480	Dectin-2 family	0.150972	0.141125	0.157219	0.149058	0.207703	0.203677	0.123245	0.18229
R-HSA-5621575	CD209 (DC-SIGN) signaling	0.185508	0.200373	0.186822	0.188959	0.224824	0.219269	0.188341	0.218365
R-HSA-5624138	Trafficking of myristoylated proteins to the cilium	0.102263	0.102497	0.0467176	0.159171	0.0528576	0.103785	0.201178	0.0755072
R-HSA-5624958	ARL13B-mediated ciliary trafficking of INPP5E	0.0874506	0.0911376	0.0925364	0.082088	0.120163	0.0707552	0.0525051	0.0818265
R-HSA-5625740	RHO GTPases activate PKNs	0.119994	0.163468	0.151331	0.1498	0.138898	0.147937	0.161115	0.152406
R-HSA-5625886	Activated PKN1 stimulates transcription of AR (androgen receptor) regulated genes KLK2 and KLK3	0.108867	0.125179	0.130049	0.122885	0.108302	0.104016	0.127599	0.143778
R-HSA-5625900	RHO GTPases activate CIT	0.138746	0.153385	0.173409	0.134981	0.172225	0.172564	0.148956	0.18069
R-HSA-5625970	RHO GTPases activate KTN1	0.153319	0.19678	0.176171	0.177194	0.208785	0.216707	0.181621	0.197569
R-HSA-5626467	RHO GTPases activate IQGAPs	0.125272	0.185276	0.163741	0.169158	0.17364	0.184151	0.167163	0.165031
R-HSA-5626978	TNFR1-mediated ceramide production	0.30893	0.321242	0.312123	0.318192	0.3359	0.339426	0.313899	0.33311
R-HSA-5627083	RHO GTPases regulate CFTR trafficking	0.301104	0.318368	0.359917	0.313217	0.315382	0.2958	0.319671	0.31756
R-HSA-5627117	RHO GTPases Activate ROCKs	0.145351	0.201748	0.168928	0.180173	0.184343	0.196422	0.184304	0.181986
R-HSA-5627123	RHO GTPases activate PAKs	0.121311	0.178725	0.144905	0.153639	0.166601	0.177636	0.163598	0.155818
R-HSA-5628897	TP53 Regulates Metabolic Genes	0.154946	0.194262	0.177738	0.18231	0.171885	0.183026	0.194688	0.178312
R-HSA-5632681	Ligand-receptor interactions	-0.128916	-0.0730786	-0.120386	0.0707627	-0.159491	-0.116976	0.0440631	-0.167945
R-HSA-5632684	Hedgehog 'on' state	0.15633	0.175414	0.170509	0.178068	0.164908	0.15717	0.180836	0.171345
R-HSA-5633008	TP53 Regulates Transcription of Cell Death Genes	0.135362	0.133733	0.146193	0.125329	0.139271	0.135849	0.126432	0.143225
R-HSA-5635838	Activation of SMO	0.0928639	0.107969	0.119158	0.121514	0.102663	0.105944	0.124069	0.10924
R-HSA-5635851	GLI proteins bind promoters of Hh responsive genes to promote transcription	-0.0154062	0.0011623	-0.0672843	0.0875303	-0.0407789	0.0194474	0.0385825	-0.0654619
R-HSA-5649702	APEX1-Independent Resolution of AP Sites via the Single Nucleotide Replacement Pathway	0.0536984	0.0398987	0.0385069	0.0124608	0.0297753	0.037306	0.0423555	0.0502496
R-HSA-5651801	PCNA-Dependent Long Patch Base Excision Repair	0.148947	0.139071	0.186673	0.139447	0.158743	0.118905	0.146243	0.177096
R-HSA-5652084	Fructose metabolism	0.0387124	0.023878	0.0574111	0.0384398	0.0236922	0.0316762	0.0181262	-0.00438877
R-HSA-5652227	Fructose biosynthesis	0.121913	0.0682064	0.234236	0.0880254	0.19888	0.0936696	0.0562875	0.109431
R-HSA-5653890	Lactose synthesis	0.06539	0.153921	0.177231	0.174476	0.158088	0.229563	0.171809	0.260375
R-HSA-5654219	Phospholipase C-mediated cascade: FGFR1	-0.0422704	0.0229993	-0.0467362	0.0673982	0.0495505	0.0898561	0.0211647	0.00539577
R-HSA-5654221	Phospholipase C-mediated cascade; FGFR2	-0.0527466	0.0172796	-0.0535543	0.0683882	0.0389495	0.08551	0.0294569	-0.0066591
R-HSA-5654227	Phospholipase C-mediated cascade; FGFR3	-0.0543998	0.0157295	-0.0414154	0.056876	0.0467571	0.0900087	0.0139452	-0.00667678
R-HSA-5654228	Phospholipase C-mediated cascade; FGFR4	-0.0563454	0.0156194	-0.0480774	0.0584271	0.0466344	0.0840905	0.0170367	-0.00468429
R-HSA-5654687	Downstream signaling of activated FGFR1	0.0247132	0.0598471	0.0225067	0.0578354	0.069832	0.0929145	0.0508373	0.0575789
R-HSA-5654688	SHC-mediated cascade:FGFR1	0.0830224	0.133988	0.107914	0.146727	0.130482	0.145046	0.132283	0.0994718
R-HSA-5654689	PI-3K cascade:FGFR1	0.042595	0.0744126	0.0237957	0.0726323	0.0805694	0.120512	0.0645508	0.0773274
R-HSA-5654693	FRS-mediated FGFR1 signaling	0.0253832	0.0708441	0.0321045	0.0685911	0.0571367	0.0849837	0.0591783	0.0339051
R-HSA-5654695	PI-3K cascade:FGFR2	0.0320899	0.0708435	0.0165595	0.0717915	0.0722559	0.116981	0.0667975	0.0696709
R-HSA-5654696	Downstream signaling of activated FGFR2	0.0249901	0.0611897	0.0230934	0.0598964	0.0720847	0.0954891	0.0536833	0.0587925
R-HSA-5654699	SHC-mediated cascade:FGFR2	0.0715628	0.125932	0.0981345	0.144332	0.120257	0.139821	0.133317	0.0877759
R-HSA-5654700	FRS-mediated FGFR2 signaling	0.021194	0.0683418	0.0288735	0.0688827	0.0537775	0.0837175	0.0609907	0.0297301
R-HSA-5654704	SHC-mediated cascade:FGFR3	0.0768497	0.130268	0.111999	0.140872	0.129501	0.145817	0.129262	0.0926564
R-HSA-5654706	FRS-mediated FGFR3 signaling	0.0223692	0.0689954	0.0337733	0.0655166	0.0563675	0.0850052	0.057375	0.0305477
R-HSA-5654708	Downstream signaling of activated FGFR3	0.025894	0.0615586	0.0265846	0.0573234	0.0741973	0.0965839	0.0509352	0.0598138
R-HSA-5654710	PI-3K cascade:FGFR3	0.0379811	0.0714082	0.0265043	0.067716	0.0795144	0.120831	0.0616703	0.0725351
R-HSA-5654712	FRS-mediated FGFR4 signaling	0.0194211	0.0664896	0.0292697	0.0637253	0.0542352	0.0815444	0.055486	0.029311
R-HSA-5654716	Downstream signaling of activated FGFR4	0.0250741	0.0612065	0.0247075	0.0574038	0.0741007	0.0954666	0.0509962	0.0598463
R-HSA-5654719	SHC-mediated cascade:FGFR4	0.0682123	0.122619	0.0996324	0.134967	0.122702	0.135693	0.123847	0.0885994
R-HSA-5654720	PI-3K cascade:FGFR4	0.0332562	0.0673316	0.0191199	0.0648326	0.0760164	0.115238	0.0585916	0.0705152
R-HSA-5654726	Negative regulation of FGFR1 signaling	0.133692	0.185948	0.14487	0.17456	0.168346	0.191012	0.168386	0.164815
R-HSA-5654727	Negative regulation of FGFR2 signaling	0.133238	0.185996	0.144381	0.175939	0.167332	0.191958	0.170002	0.163186
R-HSA-5654732	Negative regulation of FGFR3 signaling	0.135003	0.18749	0.147773	0.175523	0.169748	0.193733	0.169525	0.164977
R-HSA-5654733	Negative regulation of FGFR4 signaling	0.134505	0.187327	0.146611	0.175681	0.169731	0.193049	0.169662	0.165023
R-HSA-5654736	Signaling by FGFR1	0.0986519	0.142416	0.0993636	0.131804	0.128659	0.147961	0.126017	0.125843
R-HSA-5654738	Signaling by FGFR2	0.132624	0.161993	0.136049	0.153938	0.156346	0.165454	0.154925	0.162453
R-HSA-5654741	Signaling by FGFR3	0.100939	0.139582	0.104829	0.129189	0.135507	0.155479	0.124541	0.132497
R-HSA-5654743	Signaling by FGFR4	0.100342	0.14018	0.103234	0.129934	0.135579	0.155016	0.125372	0.132367
R-HSA-5655862	Translesion synthesis by POLK	0.18065	0.179671	0.190972	0.18129	0.184501	0.172215	0.186024	0.199423
R-HSA-5656121	Translesion synthesis by POLI	0.177907	0.176601	0.189808	0.180412	0.183096	0.169448	0.185732	0.199289
R-HSA-5656169	Termination of translesion DNA synthesis	0.184555	0.211531	0.212269	0.203001	0.202133	0.187043	0.206331	0.215951
R-HSA-5657655	MGMT-mediated DNA damage reversal	0.420089	0.419261	0.436982	0.340262	0.328172	0.108976	0.388539	0.355416
R-HSA-5658442	Regulation of RAS by GAPs	0.205205	0.225986	0.210513	0.218549	0.214554	0.207109	0.218939	0.217975
R-HSA-5658623	FGFRL1 modulation of FGFR1 signaling	0.0881389	0.124201	0.0676646	0.131866	0.0897781	0.112878	0.110611	0.0669912
R-HSA-5660489	MTF1 activates gene expression	0.108151	0.171091	0.217464	0.223317	0.137046	0.154925	0.244774	0.120305
R-HSA-5660526	Response to metal ions	0.0722713	0.157774	0.137895	0.176204	0.157426	0.125582	0.222665	0.100425
R-HSA-5660668	CLEC7A/inflammasome pathway	0.21603	0.228431	0.239301	0.199032	0.257264	0.261769	0.189067	0.254523
R-HSA-5661231	Metallothioneins bind metals	0.0505217	0.149771	0.0988735	0.161936	0.16571	0.10515	0.216869	0.0826833
R-HSA-5661270	Formation of xylulose-5-phosphate	0.168445	0.111921	0.108955	0.118283	0.153826	0.0722705	0.0866258	0.079933
R-HSA-5662702	Melanin biosynthesis	-0.207033	-0.184479	0.00916727	-0.15583	-0.217829	-0.247453	-0.150227	-0.205378
R-HSA-5663213	RHO GTPases Activate WASPs and WAVEs	0.13872	0.182645	0.1422	0.158962	0.18978	0.197935	0.161511	0.176967
R-HSA-5663220	RHO GTPases Activate Formins	0.13055	0.159221	0.163465	0.140809	0.150021	0.148125	0.154622	0.167992
R-HSA-5666185	RHO GTPases Activate Rhotekin and Rhophilins	0.136102	0.144289	0.146839	0.155171	0.095107	0.124342	0.161969	0.142067
R-HSA-5668541	TNFR2 non-canonical NF-kB pathway	0.150614	0.158424	0.156375	0.149651	0.158228	0.151026	0.151551	0.171999
R-HSA-5668599	RHO GTPases Activate NADPH Oxidases	0.0989651	0.115681	0.105207	0.111131	0.139915	0.142541	0.110518	0.129977
R-HSA-5669034	TNFs bind their physiological receptors	0.0898497	0.0674062	0.0706216	0.0479215	0.127592	0.10212	0.0299465	0.152939
R-HSA-5673000	RAF activation	0.142995	0.200022	0.17728	0.164234	0.170993	0.176204	0.181236	0.175935
R-HSA-5674135	MAP2K and MAPK activation	0.136579	0.197083	0.166302	0.169875	0.173486	0.181852	0.175952	0.167893
R-HSA-5674499	Negative feedback regulation of MAPK pathway	0.201845	0.235243	0.236066	0.213798	0.232744	0.225358	0.216166	0.252146
R-HSA-5675221	Negative regulation of MAPK pathway	0.152958	0.199184	0.177325	0.179102	0.173898	0.183711	0.189655	0.182356
R-HSA-5675482	Regulation of necroptotic cell death	0.124032	0.141057	0.137625	0.136994	0.139564	0.138074	0.135547	0.140704
R-HSA-5676590	NIK-->noncanonical NF-kB signaling	0.218213	0.226229	0.231126	0.221403	0.226646	0.210909	0.226466	0.235643
R-HSA-5676594	TNF receptor superfamily (TNFSF) members mediating non-canonical NF-kB pathway	0.102976	0.115363	0.101802	0.102156	0.104887	0.110712	0.0992145	0.125403
R-HSA-5676934	Protein repair	0.140704	0.19179	0.178116	0.206938	0.187907	0.180362	0.213806	0.145563
R-HSA-5682910	LGI-ADAM interactions	0.080095	0.0695546	0.0561908	0.0486048	0.0873672	0.0614899	0.0597161	0.0914828
R-HSA-5683826	Surfactant metabolism	0.0514976	0.0266893	0.0450732	0.0350919	0.039222	0.0793925	0.00495102	0.00759206
R-HSA-5684264	MAP3K8 (TPL2)-dependent MAPK1/3 activation	0.188243	0.195956	0.192663	0.184569	0.198025	0.199713	0.195869	0.213776
R-HSA-5685938	HDR through Single Strand Annealing (SSA)	0.102685	0.121549	0.108997	0.118251	0.113018	0.0960648	0.131255	0.127452
R-HSA-5685939	HDR through MMEJ (alt-NHEJ)	0.115009	0.131939	0.129975	0.110557	0.126327	0.107846	0.121031	0.137703
R-HSA-5685942	HDR through Homologous Recombination (HRR)	0.126605	0.144246	0.143155	0.144078	0.135279	0.115566	0.152228	0.151933
R-HSA-5686938	Regulation of TLR by endogenous ligand	0.111405	0.132505	0.172027	0.129556	0.199968	0.187622	0.0969838	0.126261
R-HSA-5687128	MAPK6/MAPK4 signaling	0.17728	0.200316	0.199111	0.191051	0.19725	0.185133	0.198506	0.206297
R-HSA-5689603	UCH proteinases	0.168122	0.180442	0.173882	0.176016	0.171452	0.173605	0.182466	0.185833
R-HSA-5689877	Josephin domain DUBs	0.180355	0.187128	0.163477	0.17668	0.181443	0.17547	0.176132	0.181876
R-HSA-5689896	Ovarian tumor domain proteases	0.196181	0.214322	0.207597	0.200533	0.204556	0.20738	0.21016	0.221219
R-HSA-5689901	Metalloprotease DUBs	0.198843	0.195222	0.195782	0.187325	0.202646	0.198715	0.192416	0.215553
R-HSA-5690714	CD22 mediated BCR regulation	0.16184	0.11889	0.0806898	0.0940265	0.196399	0.20996	0.0564674	0.119436
R-HSA-5693537	Resolution of D-Loop Structures	0.100714	0.111089	0.106369	0.115196	0.102865	0.0848126	0.127766	0.119846
R-HSA-5693538	Homology Directed Repair	0.127981	0.140278	0.148575	0.133535	0.138665	0.121565	0.140644	0.157433
R-HSA-5693548	Sensing of DNA Double Strand Breaks	0.109245	0.13101	0.0965015	0.134161	0.106631	0.100635	0.143512	0.121652
R-HSA-5693554	Resolution of D-loop Structures through Synthesis-Dependent Strand Annealing (SDSA)	0.105816	0.118137	0.11235	0.12265	0.108804	0.0923674	0.134748	0.126492
R-HSA-5693565	Recruitment and ATM-mediated phosphorylation of repair and signaling proteins at DNA double strand breaks	0.155858	0.169196	0.164462	0.165296	0.163725	0.161758	0.175937	0.181564
R-HSA-5693567	HDR through Homologous Recombination (HRR) or Single Strand Annealing (SSA)	0.12891	0.140813	0.150487	0.135168	0.139824	0.122835	0.143015	0.159259
R-HSA-5693568	Resolution of D-loop Structures through Holliday Junction Intermediates	0.101831	0.111871	0.10717	0.116015	0.103606	0.0857581	0.128604	0.120614
R-HSA-5693571	Nonhomologous End-Joining (NHEJ)	0.126249	0.133161	0.131713	0.131861	0.131658	0.120097	0.140956	0.150586
R-HSA-5693579	Homologous DNA Pairing and Strand Exchange	0.0997283	0.117622	0.113819	0.118771	0.105505	0.0877351	0.130127	0.127724
R-HSA-5693606	DNA Double Strand Break Response	0.154028	0.170175	0.163154	0.165384	0.162841	0.16045	0.17582	0.180527
R-HSA-5693607	Processing of DNA double-strand break ends	0.13149	0.143692	0.150689	0.138387	0.138655	0.125466	0.146605	0.162881
R-HSA-5693616	Presynaptic phase of homologous DNA pairing and strand exchange	0.0978072	0.115635	0.111191	0.116237	0.103468	0.0862899	0.127831	0.126068
R-HSA-5694530	Cargo concentration in the ER	0.12121	0.0808544	0.115554	0.104422	0.106719	0.118919	0.0873217	0.0771877
R-HSA-5696394	DNA Damage Recognition in GG-NER	0.159187	0.175714	0.159677	0.169277	0.168511	0.168939	0.175913	0.185352
R-HSA-5696395	Formation of Incision Complex in GG-NER	0.163996	0.177952	0.173807	0.17695	0.177929	0.17272	0.184071	0.191774
R-HSA-5696397	Gap-filling DNA repair synthesis and ligation in GG-NER	0.183483	0.195631	0.20473	0.190804	0.195312	0.172327	0.194235	0.206591
R-HSA-5696398	Nucleotide Excision Repair	0.164703	0.174622	0.169153	0.168015	0.171211	0.161403	0.175697	0.192353
R-HSA-5696399	Global Genome Nucleotide Excision Repair (GG-NER)	0.154122	0.166042	0.164601	0.161151	0.165101	0.155898	0.168683	0.181829
R-HSA-5696400	Dual Incision in GG-NER	0.181752	0.192666	0.199746	0.191038	0.198172	0.183335	0.193472	0.210836
R-HSA-606279	Deposition of new CENPA-containing nucleosomes at the centromere	0.133357	0.138196	0.162007	0.130678	0.12333	0.109771	0.14242	0.169471
R-HSA-611105	Respiratory electron transport	0.171946	0.143261	0.173904	0.154675	0.155818	0.119122	0.158972	0.164013
R-HSA-622312	Inflammasomes	0.146028	0.158135	0.160634	0.159598	0.174022	0.171644	0.159185	0.172276
R-HSA-622323	Presynaptic nicotinic acetylcholine receptors	-0.140878	-0.0808488	-0.0228201	-0.00927211	0.0428562	0.0292919	-0.0138974	-0.0161831
R-HSA-622327	Postsynaptic nicotinic acetylcholine receptors	-0.0494083	0.0105637	0.0624497	0.0619042	0.0846044	0.0774519	0.0602795	0.0559194
R-HSA-629587	Highly sodium permeable postsynaptic acetylcholine nicotinic receptors	-0.0994707	-0.0154752	0.0468407	0.0961324	0.142616	0.13342	0.074823	0.00887288
R-HSA-629594	Highly calcium permeable postsynaptic nicotinic acetylcholine receptors	-0.0291728	0.0372731	0.0967769	0.0998291	0.0878885	0.0516382	0.0967746	0.0838203
R-HSA-629597	Highly calcium permeable nicotinic acetylcholine receptors	-0.123927	-0.0530757	0.0204129	0.0396851	0.040289	-0.018383	0.0332486	0.0156129
R-HSA-674695	RNA Polymerase II Pre-transcription Events	0.157958	0.172761	0.165434	0.166368	0.160549	0.15327	0.175998	0.194864
R-HSA-6781823	Formation of TC-NER Pre-Incision Complex	0.210005	0.216549	0.202685	0.211381	0.213759	0.210516	0.215903	0.237975
R-HSA-6781827	Transcription-Coupled Nucleotide Excision Repair (TC-NER)	0.193997	0.197842	0.197246	0.192261	0.200387	0.184713	0.1967	0.223624
R-HSA-6782135	Dual incision in TC-NER	0.194078	0.194131	0.19473	0.190318	0.196005	0.183046	0.194464	0.221498
R-HSA-6782210	Gap-filling DNA repair synthesis and ligation in TC-NER	0.196133	0.196333	0.197187	0.19089	0.196188	0.181636	0.195353	0.224941
R-HSA-6782315	tRNA modification in the nucleus and cytosol	0.0686034	0.0579496	0.059769	0.0328117	0.0263651	0.0240455	0.0494888	0.0593208
R-HSA-6782861	Synthesis of wybutosine at G37 of tRNA(Phe)	-0.0539057	-0.0346965	0.013085	-0.0334243	-0.0409101	-0.128802	-0.00660758	-0.0168397
R-HSA-6783310	Fanconi Anemia Pathway	0.143703	0.148163	0.13928	0.143155	0.139052	0.123661	0.143294	0.151084
R-HSA-6783589	Interleukin-6 family signaling	0.116156	0.16692	0.133582	0.164014	0.157903	0.189825	0.164314	0.140594
R-HSA-6783783	Interleukin-10 signaling	0.102306	0.110345	0.130789	0.127872	0.204129	0.208606	0.0979631	0.137178
R-HSA-6783984	Glycine degradation	0.0894817	0.0734931	0.136727	0.0758565	0.118186	0.0801251	0.0692347	0.119632
R-HSA-6784531	tRNA processing in the nucleus	0.1453	0.145131	0.172465	0.150593	0.154053	0.127221	0.153148	0.18097
R-HSA-6785470	tRNA processing in the mitochondrion	0.234755	0.27494	0.29031	0.20962	0.202926	0.155081	0.226907	0.228795
R-HSA-6785631	ERBB2 Regulates Cell Motility	0.152567	0.190972	0.186978	0.187286	0.200026	0.201263	0.185594	0.190224
R-HSA-6787450	tRNA modification in the mitochondrion	0.119342	0.121371	0.136404	0.0970503	0.0969303	0.04818	0.113884	0.100325
R-HSA-6787639	GDP-fucose biosynthesis	0.0764545	-0.0470321	0.0339157	-0.0757601	-0.0200205	-0.121724	-0.0390169	0.00594335
R-HSA-6788467	IL-6-type cytokine receptor ligand interactions	0.0733686	0.099031	0.121949	0.127348	0.123606	0.158541	0.126498	0.0853902
R-HSA-6790901	rRNA modification in the nucleus and cytosol	0.167328	0.175469	0.164811	0.149983	0.155269	0.132544	0.1588	0.193685
R-HSA-6791226	Major pathway of rRNA processing in the nucleolus and cytosol	0.193829	0.213314	0.201621	0.200288	0.196073	0.192878	0.209053	0.209913
R-HSA-6791312	TP53 Regulates Transcription of Cell Cycle Genes	0.157782	0.174734	0.184608	0.165538	0.171261	0.171654	0.176601	0.1812
R-HSA-6793080	rRNA modification in the mitochondrion	0.116865	0.0874064	0.0856158	0.0765959	0.11077	0.103575	0.0441097	0.11302
R-HSA-6794361	Neurexins and neuroligins	0.0672468	0.086236	0.0800486	0.0816491	0.0746859	0.0753083	0.0894841	0.0860188
R-HSA-6794362	Protein-protein interactions at synapses	0.0570446	0.0821258	0.0775209	0.0830808	0.065811	0.0727939	0.091204	0.0725231
R-HSA-6796648	TP53 Regulates Transcription of DNA Repair Genes	0.154087	0.175308	0.172688	0.170258	0.165677	0.161774	0.17637	0.184092
R-HSA-6798163	Choline catabolism	-0.0272652	0.0755435	0.0326579	0.134079	-0.0217712	0.0710037	0.101247	0.00271389
R-HSA-6799198	Complex I biogenesis	0.147258	0.122738	0.14644	0.134106	0.133204	0.0988724	0.137333	0.140916
R-HSA-6799990	Metal sequestration by antimicrobial proteins	0.13654	0.103509	0.168958	0.111283	0.190923	0.178315	0.08755	0.11034
R-HSA-6803157	Antimicrobial peptides	0.149331	0.0895822	0.144404	0.118158	0.160229	0.144886	0.0905677	0.134285
R-HSA-6803204	TP53 Regulates Transcription of Genes Involved in Cytochrome C Release	0.179021	0.185206	0.194034	0.171431	0.193002	0.199099	0.176034	0.193824
R-HSA-6803205	TP53 regulates transcription of several additional cell death genes whose specific roles in p53-dependent apoptosis remain uncertain	0.172085	0.179361	0.184718	0.168924	0.177402	0.181702	0.177459	0.182031
R-HSA-6803207	TP53 Regulates Transcription of Caspase Activators and Caspases	0.137303	0.141301	0.147174	0.133451	0.143928	0.136394	0.141334	0.14555
R-HSA-6803211	TP53 Regulates Transcription of Death Receptors and Ligands	0.180722	0.190432	0.196046	0.185998	0.18585	0.198378	0.187084	0.197501
R-HSA-6803529	FGFR2 alternative splicing	0.201734	0.207209	0.197437	0.203888	0.198075	0.19208	0.216598	0.223654
R-HSA-6803544	Ion influx/efflux at host-pathogen interface	0.0694484	0.0125904	0.00145995	0.131371	0.123406	0.0505804	0.062867	0.037079
R-HSA-6804114	TP53 Regulates Transcription of Genes Involved in G2 Cell Cycle Arrest	0.160622	0.180416	0.196102	0.175302	0.182351	0.179146	0.183458	0.18671
R-HSA-6804115	TP53 regulates transcription of additional cell cycle genes whose exact role in the p53 pathway remain uncertain	0.196028	0.214572	0.216512	0.210421	0.207196	0.214253	0.221365	0.218059
R-HSA-6804116	TP53 Regulates Transcription of Genes Involved in G1 Cell Cycle Arrest	0.16092	0.163974	0.186241	0.151687	0.171078	0.168804	0.162676	0.179038
R-HSA-6804754	Regulation of TP53 Expression	0.208261	0.221334	0.22382	0.213248	0.220962	0.229064	0.223439	0.223268
R-HSA-6804757	Regulation of TP53 Degradation	0.159114	0.184614	0.181002	0.177887	0.170974	0.177414	0.188086	0.189312
R-HSA-6804758	Regulation of TP53 Activity through Acetylation	0.150309	0.174219	0.167099	0.168993	0.163888	0.179919	0.178269	0.186162
R-HSA-6804759	Regulation of TP53 Activity through Association with Co-factors	0.164868	0.18697	0.186303	0.181249	0.184478	0.196133	0.183562	0.190191
R-HSA-6804760	Regulation of TP53 Activity through Methylation	0.188437	0.207496	0.192205	0.198264	0.192756	0.199552	0.207625	0.208878
R-HSA-6805567	Keratinization	0.0822992	0.0771006	0.129182	0.0852001	0.0928727	0.107988	0.0758373	0.088883
R-HSA-6806003	Regulation of TP53 Expression and Degradation	0.159827	0.185731	0.181795	0.178707	0.171613	0.178199	0.189068	0.189951
R-HSA-6806664	Metabolism of vitamin K	0.102183	0.00599181	0.0723903	0.0626326	0.0542515	0.0213514	0.0444462	0.055612
R-HSA-6806667	Metabolism of fat-soluble vitamins	0.0717951	0.0811518	0.101399	0.111703	0.0836081	0.0596666	0.100651	0.0557937
R-HSA-6806834	Signaling by MET	0.113523	0.144576	0.133608	0.138828	0.14697	0.151568	0.134037	0.140514
R-HSA-6806942	MET Receptor Activation	-0.0277169	0.021023	0.0527036	-0.0177689	0.110062	0.0985906	0.0471261	0.00744418
R-HSA-6807004	Negative regulation of MET activity	0.0999736	0.140578	0.12455	0.128765	0.130122	0.133405	0.131133	0.123883
R-HSA-6807047	Cholesterol biosynthesis via desmosterol	0.164932	0.120197	0.140161	0.137422	0.150554	0.099075	0.10386	0.124199
R-HSA-6807062	Cholesterol biosynthesis via lathosterol	0.164932	0.120197	0.140161	0.137422	0.150554	0.099075	0.10386	0.124199
R-HSA-6807505	RNA polymerase II transcribes snRNA genes	0.163415	0.176389	0.163865	0.164938	0.166174	0.163949	0.179266	0.202107
R-HSA-6807878	COPI-mediated anterograde transport	0.120275	0.118655	0.125478	0.118193	0.112323	0.11531	0.120756	0.123632
R-HSA-6809371	Formation of the cornified envelope	0.0924875	0.0874229	0.147887	0.0860969	0.104087	0.123267	0.0707461	0.102048
R-HSA-6811434	COPI-dependent Golgi-to-ER retrograde traffic	0.138127	0.125933	0.144646	0.135873	0.117599	0.112684	0.128811	0.127379
R-HSA-6811436	COPI-independent Golgi-to-ER retrograde traffic	0.156413	0.185949	0.190808	0.186849	0.195265	0.186238	0.190563	0.183233
R-HSA-6811438	Intra-Golgi traffic	0.145464	0.133144	0.106492	0.138617	0.123123	0.111675	0.129868	0.121245
R-HSA-6811440	Retrograde transport at the Trans-Golgi-Network	0.134361	0.134951	0.128105	0.125812	0.131119	0.108805	0.120939	0.121907
R-HSA-6811442	Intra-Golgi and retrograde Golgi-to-ER traffic	0.144037	0.135976	0.140789	0.135136	0.135333	0.125734	0.131624	0.134865
R-HSA-6811555	PI5P Regulates TP53 Acetylation	0.138475	0.154707	0.151445	0.147219	0.152292	0.170728	0.157628	0.157626
R-HSA-6814122	Cooperation of PDCL (PhLP1) and TRiC/CCT in G-protein beta folding	0.13384	0.187493	0.172271	0.179881	0.179724	0.168155	0.196068	0.180128
R-HSA-6814848	Glycerophospholipid catabolism	-0.124613	-0.0295988	-0.0814348	-0.0476812	-0.0426906	-0.015045	-0.0805999	-0.119264
R-HSA-68616	Assembly of the ORC complex at the origin of replication	0.138144	0.13052	0.15723	0.126709	0.136562	0.111415	0.138078	0.16591
R-HSA-68689	CDC6 association with the ORC:origin complex	-0.0289537	-0.0451707	0.0668906	-0.0809117	0.00244413	-0.051298	-0.0596365	0.00858188
R-HSA-68867	Assembly of the pre-replicative complex	0.170788	0.171392	0.193323	0.165736	0.173104	0.154463	0.172431	0.189301
R-HSA-68881	Mitotic Metaphase/Anaphase Transition	0.0665999	0.117833	0.13721	0.090218	0.102028	0.108046	0.108194	0.128248
R-HSA-68884	Mitotic Telophase/Cytokinesis	0.101291	0.140509	0.173859	0.117437	0.136387	0.138823	0.134124	0.156901
R-HSA-68911	G2 Phase	0.0992569	0.111714	0.186594	0.0867087	0.134489	0.105641	0.105324	0.150802
R-HSA-68949	Orc1 removal from chromatin	0.17213	0.176547	0.196203	0.167472	0.178816	0.160873	0.176015	0.193408
R-HSA-68952	DNA replication initiation	0.127649	0.129861	0.196694	0.0983489	0.134817	0.0548597	0.0967726	0.171847
R-HSA-68962	Activation of the pre-replicative complex	0.0553716	0.0583398	0.118038	0.0346955	0.0790337	0.0500065	0.052827	0.107768
R-HSA-69002	DNA Replication Pre-Initiation	0.160877	0.159573	0.185168	0.151143	0.165497	0.143392	0.159971	0.183717
R-HSA-69017	CDK-mediated phosphorylation and removal of Cdc6	0.182355	0.188292	0.208187	0.18124	0.190438	0.171408	0.185759	0.199419
R-HSA-69052	Switching of origins to a post-replicative state	0.160928	0.162957	0.184416	0.155694	0.165502	0.14784	0.164295	0.180953
R-HSA-69091	Polymerase switching	0.154401	0.158087	0.208783	0.153043	0.175657	0.114387	0.154429	0.193005
R-HSA-69109	Leading Strand Synthesis	0.154401	0.158087	0.208783	0.153043	0.175657	0.114387	0.154429	0.193005
R-HSA-69166	Removal of the Flap Intermediate	0.153203	0.115662	0.201173	0.116017	0.166431	0.0866653	0.123052	0.170342
R-HSA-69183	Processive synthesis on the lagging strand	0.150155	0.112077	0.199804	0.112059	0.163635	0.0816568	0.118789	0.168697
R-HSA-69186	Lagging Strand Synthesis	0.128121	0.121275	0.176714	0.115093	0.141133	0.0805018	0.122464	0.161587
R-HSA-69190	DNA strand elongation	0.0930202	0.107842	0.155371	0.083507	0.116479	0.0664521	0.0968377	0.138793
R-HSA-69200	Phosphorylation of proteins involved in G1/S transition by active Cyclin E:Cdk2 complexes	0.157667	0.144089	0.192361	0.120397	0.166773	0.146195	0.142745	0.17771
R-HSA-69202	Cyclin E associated events during G1/S transition	0.173972	0.181526	0.199138	0.173281	0.180726	0.169462	0.182003	0.205287
R-HSA-69205	G1/S-Specific Transcription	0.150576	0.164177	0.193283	0.154688	0.161457	0.143476	0.162682	0.197549
R-HSA-69231	Cyclin D associated events in G1	0.144987	0.151229	0.157407	0.142052	0.157348	0.155632	0.151238	0.167457
R-HSA-69236	G1 Phase	0.144987	0.151229	0.157407	0.142052	0.157348	0.155632	0.151238	0.167457
R-HSA-69239	Synthesis of DNA	0.153967	0.155872	0.182783	0.146026	0.160874	0.134856	0.15497	0.176092
R-HSA-69273	Cyclin A/B1/B2 associated events during G2/M transition	0.108023	0.143545	0.16621	0.126036	0.141293	0.136217	0.144908	0.168871
R-HSA-69306	DNA Replication	0.15899	0.157212	0.181012	0.147873	0.162116	0.137707	0.157739	0.182517
R-HSA-69416	Dimerization of procaspase-8	0.0712496	0.0938928	0.0756738	0.0795611	0.0837438	0.0968561	0.0745013	0.101699
R-HSA-69478	G2/M DNA replication checkpoint	0.143152	0.179258	0.244523	0.18196	0.199608	0.129502	0.180401	0.22508
R-HSA-69541	Stabilization of p53	0.211455	0.231051	0.227208	0.223995	0.221902	0.216724	0.22837	0.230454
R-HSA-69560	Transcriptional activation of p53 responsive genes	0.17394	0.183795	0.197758	0.176358	0.188877	0.191073	0.18366	0.192802
R-HSA-69563	p53-Dependent G1 DNA Damage Response	0.194458	0.212002	0.217521	0.201629	0.207109	0.199097	0.207742	0.217844
R-HSA-69580	p53-Dependent G1/S DNA damage checkpoint	0.194458	0.212002	0.217521	0.201629	0.207109	0.199097	0.207742	0.217844
R-HSA-69601	Ubiquitin Mediated Degradation of Phosphorylated Cdc25A	0.218974	0.231422	0.238305	0.226491	0.226504	0.210941	0.226402	0.233323
R-HSA-69610	p53-Independent DNA Damage Response	0.218974	0.231422	0.238305	0.226491	0.226504	0.210941	0.226402	0.233323
R-HSA-69613	p53-Independent G1/S DNA damage checkpoint	0.218974	0.231422	0.238305	0.226491	0.226504	0.210941	0.226402	0.233323
R-HSA-69615	G1/S DNA Damage Checkpoints	0.193944	0.211128	0.218136	0.200802	0.207201	0.198239	0.207022	0.218106
R-HSA-69618	Mitotic Spindle Checkpoint	0.126362	0.140574	0.159599	0.125678	0.136413	0.126271	0.13978	0.159263
R-HSA-69656	Cyclin A:Cdk2-associated events at S phase entry	0.172733	0.179587	0.198106	0.171187	0.179841	0.168125	0.179785	0.20448
R-HSA-69895	Transcriptional activation of cell cycle inhibitor p21	0.17394	0.183795	0.197758	0.176358	0.188877	0.191073	0.18366	0.192802
R-HSA-70171	Glycolysis	0.112413	0.143583	0.161426	0.144017	0.163214	0.146656	0.155004	0.170882
R-HSA-70221	Glycogen breakdown (glycogenolysis)	0.0211746	0.0117259	0.108562	0.0601328	0.105031	0.0619304	0.069486	0.00249597
R-HSA-70263	Gluconeogenesis	0.112127	0.14129	0.167387	0.146347	0.165546	0.130781	0.161515	0.147882
R-HSA-70268	Pyruvate metabolism	0.214899	0.224666	0.219787	0.218677	0.227069	0.207273	0.221912	0.222816
R-HSA-70326	Glucose metabolism	0.112049	0.138705	0.159517	0.138357	0.162464	0.139788	0.148769	0.164989
R-HSA-70350	Fructose catabolism	0.0324924	0.0205878	0.0431044	0.0347235	0.00966744	0.0269324	0.0153246	-0.0132215
R-HSA-70370	Galactose catabolism	0.0418505	0.0875144	0.116399	0.0419263	0.0842595	0.0924254	0.00195022	0.114332
R-HSA-70635	Urea cycle	0.0654281	0.0796897	0.136831	0.0897144	-0.00342401	0.0322593	0.0843593	0.0709044
R-HSA-70688	Proline catabolism	-0.0665196	-0.0515612	0.0589035	0.0129524	-0.0435408	-0.0683117	0.029734	-0.0373653
R-HSA-70895	Branched-chain amino acid catabolism	0.185434	0.189	0.162295	0.197754	0.175544	0.135845	0.221695	0.15386
R-HSA-70921	Histidine catabolism	-0.0789328	-0.0632292	-0.0933837	-0.0102431	-0.0155586	0.0301402	-0.0277097	-0.0965064
R-HSA-71032	Propionyl-CoA catabolism	0.096931	0.045177	0.0988653	0.0819701	0.0885983	-0.00997862	0.064132	0.0778971
R-HSA-71064	Lysine catabolism	0.0593807	0.075083	0.0972862	0.0726027	0.0869422	0.0566343	0.0670009	0.0908901
R-HSA-71240	Tryptophan catabolism	0.0599049	-0.0126373	0.1286	0.0255188	0.11884	0.111868	0.0360601	0.0539961
R-HSA-71262	Carnitine synthesis	-0.087569	-0.0916722	-0.0430549	-0.11741	-0.113021	-0.215389	-0.115217	-0.12425
R-HSA-71288	Creatine metabolism	0.0499625	-0.0306853	0.00419318	-0.0231083	0.0246321	0.00999331	0.0183869	-0.0218187
R-HSA-71291	Metabolism of amino acids and derivatives	0.165013	0.162739	0.181878	0.162278	0.166302	0.147718	0.163666	0.166965
R-HSA-71336	Pentose phosphate pathway	0.122839	0.113243	0.150767	0.12175	0.128597	0.0849867	0.127462	0.120802
R-HSA-71384	Ethanol oxidation	-0.131277	-0.0929873	-0.0784383	-0.0108587	-0.0869795	-0.097921	-0.000899383	-0.187704
R-HSA-71387	Metabolism of carbohydrates	0.0978264	0.117793	0.128319	0.133455	0.135567	0.125084	0.122733	0.112273
R-HSA-71403	Citric acid cycle (TCA cycle)	0.152423	0.13149	0.164238	0.132923	0.149076	0.10279	0.141909	0.161953
R-HSA-71737	Pyrophosphate hydrolysis	0.15987	0.0799688	0.20509	0.103129	0.131532	0.0134566	0.165623	0.0611267
R-HSA-72086	mRNA Capping	0.218733	0.209601	0.217799	0.207655	0.211744	0.206201	0.213745	0.253608
R-HSA-72165	mRNA Splicing - Minor Pathway	0.233014	0.232846	0.229045	0.22249	0.224477	0.214773	0.235019	0.261678
R-HSA-72187	mRNA 3'-end processing	0.224185	0.238384	0.225932	0.218051	0.217866	0.218265	0.2304	0.252744
R-HSA-72200	mRNA Editing: C to U Conversion	0.0746931	-0.043458	0.113058	0.0378497	0.0589728	0.075251	0.0263608	0.0677854
R-HSA-72202	Transport of Mature Transcript to Cytoplasm	0.171462	0.187695	0.176715	0.169019	0.169333	0.166327	0.181018	0.19962
R-HSA-72306	tRNA processing	0.129397	0.126639	0.144373	0.118166	0.121311	0.0964184	0.125009	0.147926
R-HSA-72312	rRNA processing	0.189493	0.204782	0.19513	0.190438	0.189185	0.183349	0.197323	0.204014
R-HSA-72613	Eukaryotic Translation Initiation	0.321069	0.338113	0.316903	0.333359	0.325318	0.320613	0.339007	0.330542
R-HSA-72649	Translation initiation complex formation	0.297696	0.319521	0.293591	0.317548	0.303592	0.306967	0.327732	0.315842
R-HSA-72662	Activation of the mRNA upon binding of the cap-binding complex and eIFs, and subsequent binding to 43S	0.290696	0.315765	0.287959	0.31097	0.298834	0.301352	0.320717	0.307359
R-HSA-72689	Formation of a pool of free 40S subunits	0.349638	0.365042	0.346949	0.360088	0.351635	0.346989	0.363956	0.360504
R-HSA-72695	Formation of the ternary complex, and subsequently, the 43S complex	0.310633	0.328907	0.309979	0.32318	0.319876	0.320829	0.330832	0.330987
R-HSA-72702	Ribosomal scanning and start codon recognition	0.295404	0.315342	0.296001	0.310899	0.303877	0.304678	0.319299	0.312953
R-HSA-72706	GTP hydrolysis and joining of the 60S ribosomal subunit	0.334245	0.349891	0.333653	0.345771	0.339933	0.336695	0.351173	0.346257
R-HSA-72731	Recycling of eIF2:GDP	0.208082	0.200387	0.209318	0.195167	0.244584	0.213194	0.193207	0.228156
R-HSA-72737	Cap-dependent Translation Initiation	0.321069	0.338113	0.316903	0.333359	0.325318	0.320613	0.339007	0.330542
R-HSA-72764	Eukaryotic Translation Termination	0.342057	0.359962	0.34447	0.357472	0.349946	0.344535	0.359963	0.356149
R-HSA-72766	Translation	0.239062	0.235675	0.2415	0.236746	0.232421	0.204633	0.24025	0.238584
R-HSA-727802	Transport of nucleotide sugars	0.0577986	0.0593006	0.0948072	0.0888837	0.0575501	0.0880206	0.0323431	0.0259606
R-HSA-73614	Pyrimidine salvage	0.0981109	0.143029	0.166169	0.0841563	0.117911	0.108714	0.0776864	0.105181
R-HSA-73621	Pyrimidine catabolism	0.0347943	0.168149	0.162817	0.176118	0.178589	0.213828	0.101605	0.11378
R-HSA-73728	RNA Polymerase I Promoter Opening	0.137876	0.161763	0.166131	0.154253	0.142667	0.119857	0.163614	0.175181
R-HSA-73762	RNA Polymerase I Transcription Initiation	0.141678	0.15837	0.154703	0.15983	0.142772	0.142592	0.162607	0.180419
R-HSA-73772	RNA Polymerase I Promoter Escape	0.143894	0.140644	0.154774	0.145933	0.124906	0.121059	0.150461	0.169793
R-HSA-73776	RNA Polymerase II Promoter Escape	0.165798	0.162345	0.156132	0.157277	0.149664	0.148183	0.163892	0.195153
R-HSA-73779	RNA Polymerase II Transcription Pre-Initiation And Promoter Opening	0.165798	0.162345	0.156132	0.157277	0.149664	0.148183	0.163892	0.195153
R-HSA-73780	RNA Polymerase III Chain Elongation	0.119179	0.115248	0.120137	0.11818	0.0993786	0.0900314	0.114619	0.136405
R-HSA-73817	Purine ribonucleoside monophosphate biosynthesis	0.0772464	0.117953	0.1622	0.141471	0.102316	0.0823254	0.163185	0.120697
R-HSA-73843	5-Phosphoribose 1-diphosphate biosynthesis	0.189391	0.154956	0.157814	0.165738	0.158422	0.144303	0.193636	0.17463
R-HSA-73854	RNA Polymerase I Promoter Clearance	0.14097	0.160408	0.15508	0.156548	0.141119	0.137744	0.162079	0.177806
R-HSA-73856	RNA Polymerase II Transcription Termination	0.227101	0.237374	0.230189	0.217938	0.220002	0.214315	0.227813	0.255627
R-HSA-73863	RNA Polymerase I Transcription Termination	0.136087	0.136158	0.140401	0.140198	0.112955	0.121764	0.140206	0.157348
R-HSA-73864	RNA Polymerase I Transcription	0.1406	0.162789	0.154572	0.157184	0.140271	0.138868	0.163355	0.176559
R-HSA-73884	Base Excision Repair	0.143493	0.144882	0.160644	0.139188	0.147528	0.124831	0.144985	0.162821
R-HSA-73886	Chromosome Maintenance	0.14941	0.157586	0.173438	0.149159	0.151793	0.129519	0.161254	0.184484
R-HSA-73893	DNA Damage Bypass	0.182026	0.187755	0.187916	0.179062	0.191216	0.18448	0.18422	0.207328
R-HSA-73927	Depurination	0.160971	0.150831	0.167306	0.151772	0.154507	0.132261	0.158377	0.179163
R-HSA-73928	Depyrimidination	0.158474	0.160491	0.167051	0.154802	0.154173	0.136751	0.161155	0.170918
R-HSA-73929	Base-Excision Repair, AP Site Formation	0.158755	0.160971	0.166518	0.156998	0.154581	0.135442	0.162119	0.170617
R-HSA-73930	Abasic sugar-phosphate removal via the single-nucleotide replacement pathway	0.230739	0.195009	0.189451	0.215239	0.215719	0.252683	0.223969	0.231408
R-HSA-73933	Resolution of Abasic Sites (AP sites)	0.125494	0.136542	0.149539	0.131101	0.135094	0.110704	0.134759	0.141753
R-HSA-73942	DNA Damage Reversal	0.225687	0.150184	0.176424	0.154243	0.0946143	0.0707	0.143075	0.159386
R-HSA-73943	Reversal of alkylation damage by DNA dioxygenases	0.206721	0.123124	0.150324	0.135909	0.0710913	0.0670584	0.118449	0.140054
R-HSA-73980	RNA Polymerase III Transcription Termination	0.103058	0.119504	0.115422	0.111262	0.0806873	0.0787866	0.110006	0.115674
R-HSA-74158	RNA Polymerase III Transcription	0.107839	0.124149	0.117872	0.11668	0.0903285	0.0908377	0.118146	0.123764
R-HSA-74182	Ketone body metabolism	0.036843	0.0286022	-0.0261475	0.0612276	-0.0646294	-0.00794193	0.054131	0.0203199
R-HSA-74217	Purine salvage	0.167947	0.178441	0.20252	0.187185	0.238318	0.202179	0.177073	0.210521
R-HSA-74259	Purine catabolism	0.0711188	0.105565	0.119333	0.142011	0.116481	0.0587194	0.141144	0.118976
R-HSA-74713	IRS activation	0.170413	0.216209	0.229433	0.214519	0.190762	0.252868	0.220247	0.199775
R-HSA-74749	Signal attenuation	0.100602	0.175409	0.14583	0.143704	0.163373	0.190757	0.137407	0.152492
R-HSA-74751	Insulin receptor signalling cascade	0.0667235	0.106365	0.0831809	0.100909	0.105313	0.129774	0.0935971	0.101677
R-HSA-74752	Signaling by Insulin receptor	0.0759693	0.0966452	0.0835893	0.0999506	0.111278	0.129579	0.0926114	0.099095
R-HSA-749476	RNA Polymerase III Abortive And Retractive Initiation	0.107839	0.124149	0.117872	0.11668	0.0903285	0.0908377	0.118146	0.123764
R-HSA-75035	Chk1/Chk2(Cds1) mediated inactivation of Cyclin B:Cdk1 complex	0.108882	0.173335	0.15432	0.150331	0.138077	0.147228	0.164881	0.142788
R-HSA-75064	mRNA Editing: A to I Conversion	0.266313	0.310067	0.256212	0.263129	0.244879	0.263817	0.330718	0.304668
R-HSA-75067	Processing of Capped Intronless Pre-mRNA	0.226883	0.235215	0.240948	0.223271	0.232174	0.218212	0.23071	0.260618
R-HSA-75072	mRNA Editing	0.124159	0.0564296	0.15029	0.0980063	0.107193	0.125151	0.109793	0.130752
R-HSA-75094	Formation of the Editosome	0.0746931	-0.043458	0.113058	0.0378497	0.0589728	0.075251	0.0263608	0.0677854
R-HSA-75102	C6 deamination of adenosine	0.266313	0.310067	0.256212	0.263129	0.244879	0.263817	0.330718	0.304668
R-HSA-75105	Fatty acyl-CoA biosynthesis	0.0779803	0.0929071	0.0965786	0.0816717	0.0990284	0.100103	0.0774129	0.0681371
R-HSA-75108	Activation, myristolyation of BID and translocation to mitochondria	0.238734	0.205451	0.216005	0.164004	0.244474	0.209601	0.153548	0.262692
R-HSA-75109	Triglyceride biosynthesis	0.142348	0.116772	0.113688	0.136292	0.176105	0.180824	0.136253	0.167513
R-HSA-75153	Apoptotic execution phase	0.115229	0.14007	0.137952	0.123659	0.134044	0.136651	0.125994	0.136051
R-HSA-75157	FasL/ CD95L signaling	0.13899	0.17517	0.172115	0.173317	0.177679	0.1831	0.156867	0.196963
R-HSA-75158	TRAIL signaling	0.161349	0.161731	0.157325	0.130972	0.159425	0.15664	0.114115	0.18693
R-HSA-75205	Dissolution of Fibrin Clot	0.0704271	0.113037	0.162663	0.141176	0.105971	0.152509	0.0890994	0.0781553
R-HSA-75815	Ubiquitin-dependent degradation of Cyclin D	0.208138	0.219763	0.222433	0.21477	0.213652	0.199898	0.213097	0.224471
R-HSA-75876	Synthesis of very long-chain fatty acyl-CoAs	0.108279	0.126675	0.0957624	0.117024	0.129982	0.145437	0.102978	0.0864206
R-HSA-75892	Platelet Adhesion to exposed collagen	0.148998	0.199213	0.166168	0.201486	0.23266	0.230859	0.176744	0.194309
R-HSA-75896	Plasmalogen biosynthesis	-0.0272994	0.0104876	0.0449126	-0.0340832	-0.0248996	-0.0788581	0.00239014	-0.0441703
R-HSA-75944	Transcription from mitochondrial promoters	0.167737	0.151839	0.233317	0.157307	0.168064	0.138733	0.1332	0.183511
R-HSA-75953	RNA Polymerase II Transcription Initiation	0.165798	0.162345	0.156132	0.157277	0.149664	0.148183	0.163892	0.195153
R-HSA-75955	RNA Polymerase II Transcription Elongation	0.167859	0.180516	0.177566	0.175419	0.172643	0.16449	0.184077	0.204584
R-HSA-76005	Response to elevated platelet cytosolic Ca2+	0.133803	0.166234	0.146418	0.169527	0.164325	0.164307	0.165908	0.145693
R-HSA-76009	Platelet Aggregation (Plug Formation)	0.118901	0.167902	0.135148	0.158471	0.174919	0.186549	0.143851	0.160443
R-HSA-76042	RNA Polymerase II Transcription Initiation And Promoter Clearance	0.165798	0.162345	0.156132	0.157277	0.149664	0.148183	0.163892	0.195153
R-HSA-76046	RNA Polymerase III Transcription Initiation	0.119702	0.121789	0.120814	0.122416	0.10585	0.0996219	0.122342	0.140147
R-HSA-76061	RNA Polymerase III Transcription Initiation From Type 1 Promoter	0.130757	0.132462	0.134854	0.131365	0.113633	0.0991314	0.129063	0.150024
R-HSA-76066	RNA Polymerase III Transcription Initiation From Type 2 Promoter	0.128552	0.131229	0.133222	0.130034	0.111795	0.098031	0.127943	0.148164
R-HSA-76071	RNA Polymerase III Transcription Initiation From Type 3 Promoter	0.11967	0.119378	0.115339	0.120513	0.102493	0.100338	0.121018	0.136809
R-HSA-77042	Formation of editosomes by ADAR proteins	0.266313	0.310067	0.256212	0.263129	0.244879	0.263817	0.330718	0.304668
R-HSA-77075	RNA Pol II CTD phosphorylation and interaction with CE	0.203826	0.184482	0.198921	0.188951	0.188664	0.179585	0.190682	0.235658
R-HSA-77108	Utilization of Ketone Bodies	0.02788	0.0384295	-0.137887	-0.0251678	-0.0622746	-0.0690023	0.0233644	0.0236669
R-HSA-77111	Synthesis of Ketone Bodies	0.0706237	0.0837233	0.0302811	0.130509	-0.0297148	0.0480299	0.105771	0.0551516
R-HSA-77285	Beta oxidation of myristoyl-CoA to lauroyl-CoA	0.108192	0.104604	0.141136	0.0856524	0.120877	0.0636442	0.132878	0.10328
R-HSA-77286	mitochondrial fatty acid beta-oxidation of saturated fatty acids	0.126833	0.127908	0.148476	0.12867	0.138987	0.0757451	0.149237	0.107825
R-HSA-77288	mitochondrial fatty acid beta-oxidation of unsaturated fatty acids	0.168095	0.126476	0.206123	0.129159	0.169304	0.0710497	0.151014	0.162625
R-HSA-77289	Mitochondrial Fatty Acid Beta-Oxidation	0.101886	0.0757286	0.117841	0.0794377	0.0981211	0.0355407	0.0797003	0.0956047
R-HSA-77305	Beta oxidation of palmitoyl-CoA to myristoyl-CoA	0.189725	0.199223	0.199779	0.170189	0.183594	0.127461	0.214662	0.180294
R-HSA-77310	Beta oxidation of lauroyl-CoA to decanoyl-CoA-CoA	0.127586	0.138587	0.16397	0.143251	0.170895	0.119089	0.174791	0.13369
R-HSA-77346	Beta oxidation of decanoyl-CoA to octanoyl-CoA-CoA	0.169548	0.180255	0.182529	0.185915	0.197388	0.141367	0.216052	0.167328
R-HSA-77348	Beta oxidation of octanoyl-CoA to hexanoyl-CoA	0.185358	0.198266	0.196306	0.202232	0.219881	0.162709	0.233829	0.187669
R-HSA-77350	Beta oxidation of hexanoyl-CoA to butanoyl-CoA	0.166712	0.172	0.182449	0.178454	0.20497	0.1445	0.206814	0.171426
R-HSA-77352	Beta oxidation of butanoyl-CoA to acetyl-CoA	0.100493	0.0789728	0.138614	0.152836	0.171923	0.0981271	0.160407	0.0890487
R-HSA-77387	Insulin receptor recycling	0.0985556	0.0894162	0.0959563	0.11797	0.125766	0.144075	0.113939	0.098048
R-HSA-774815	Nucleosome assembly	0.133357	0.138196	0.162007	0.130678	0.12333	0.109771	0.14242	0.169471
R-HSA-77588	SLBP Dependent Processing of Replication-Dependent Histone Pre-mRNAs	0.245776	0.251578	0.255994	0.238869	0.251117	0.230001	0.246952	0.282093
R-HSA-77595	Processing of Intronless Pre-mRNAs	0.2215	0.244749	0.241507	0.229789	0.240062	0.238626	0.241029	0.263058
R-HSA-804914	Transport of fatty acids	0.0593113	0.00436596	0.0580889	0.047534	0.0652305	0.114155	0.0120328	0.00265953
R-HSA-83936	Transport of nucleosides and free purine and pyrimidine bases across the plasma membrane	0.0902172	0.0921199	0.0829867	0.114355	0.0867271	0.100315	0.123131	0.0653373
R-HSA-844455	The NLRP1 inflammasome	0.264864	0.195024	0.243541	0.191744	0.253245	0.219474	0.164498	0.265264
R-HSA-844456	The NLRP3 inflammasome	0.13985	0.157736	0.157164	0.160215	0.17167	0.169679	0.160796	0.167788
R-HSA-844615	The AIM2 inflammasome	0.0696015	-0.035043	0.0723007	-0.112104	0.186749	0.206798	-0.139804	0.113972
R-HSA-844623	The IPAF inflammasome	0.153565	-0.0311475	0.142877	-0.107517	0.212222	0.220233	-0.159816	0.166939
R-HSA-877300	Interferon gamma signaling	0.195933	0.226567	0.220984	0.203481	0.235353	0.223402	0.207767	0.234844
R-HSA-877312	Regulation of IFNG signaling	0.109453	0.155791	0.103721	0.1287	0.144248	0.156483	0.138084	0.138258
R-HSA-879415	Advanced glycosylation endproduct receptor signaling	0.152238	0.177142	0.175072	0.179664	0.190802	0.184892	0.179191	0.182128
R-HSA-879518	Transport of organic anions	-0.0592012	0.0979824	-0.102657	-0.0647448	0.0677286	0.0635477	-0.0644146	-0.101149
R-HSA-880009	Interconversion of 2-oxoglutarate and 2-hydroxyglutarate	-0.139548	-0.211767	-0.182488	-0.180488	-0.193164	-0.158524	-0.131515	-0.160245
R-HSA-881907	Gastrin-CREB signalling pathway via PKC and MAPK	0.135488	0.170235	0.164466	0.169667	0.183075	0.173805	0.165734	0.169091
R-HSA-8847453	Synthesis of PIPs in the nucleus	0.025551	0.11166	0.0366388	0.0791776	0.0511034	0.107359	0.13718	0.0656911
R-HSA-8847993	ERBB2 Activates PTK6 Signaling	0.150513	0.187466	0.190835	0.185322	0.19846	0.193903	0.182452	0.192324
R-HSA-8848584	Wax and plasmalogen biosynthesis	0.0147202	0.0986448	0.0412952	0.00707036	0.0354362	0.00283303	0.045332	-0.0204642
R-HSA-8849175	Threonine catabolism	-0.0416423	-0.108205	-0.0674228	-0.120146	0.182773	0.00770678	-0.096806	-0.108889
R-HSA-8849468	PTK6 Regulates Proteins Involved in RNA Processing	0.104196	0.155481	0.117567	0.136021	0.138059	0.138529	0.136536	0.166971
R-HSA-8849469	PTK6 Regulates RTKs and Their Effectors AKT1 and DOK1	0.193371	0.231197	0.204215	0.215365	0.228516	0.239636	0.216975	0.234537
R-HSA-8849470	PTK6 Regulates Cell Cycle	0.12051	0.11058	0.186119	0.0964859	0.143716	0.125537	0.105918	0.177967
R-HSA-8849471	PTK6 Regulates RHO GTPases, RAS GTPase and MAP kinases	0.12889	0.17236	0.135786	0.159632	0.171393	0.177675	0.159203	0.173117
R-HSA-8849472	PTK6 Down-Regulation	0.085204	0.143574	0.158948	0.14163	0.0994815	0.114216	0.15174	0.134349
R-HSA-8849473	PTK6 Expression	0.186099	0.189341	0.207392	0.192585	0.195305	0.197339	0.184971	0.226673
R-HSA-8849474	PTK6 Activates STAT3	0.143974	0.18397	0.171549	0.180589	0.173272	0.185105	0.181165	0.175973
R-HSA-8849932	Synaptic adhesion-like molecules	0.06973	0.0866691	0.101974	0.0990652	0.0692525	0.0746345	0.108583	0.0859342
R-HSA-8850843	Phosphate bond hydrolysis by NTPDase proteins	0.0647668	0.0254009	-0.0267152	0.0126552	0.039515	0.0139879	-0.00214704	0.0445425
R-HSA-8851680	Butyrophilin (BTN) family interactions	0.0379262	0.000119773	0.0286019	-0.0285849	0.0162642	0.0374823	-0.03141	0.0312323
R-HSA-8851805	MET activates RAS signaling	0.116569	0.162622	0.133043	0.133008	0.173772	0.178178	0.147798	0.143589
R-HSA-8851907	MET activates PI3K/AKT signaling	0.0604664	0.0972303	0.0445179	0.0822658	0.118153	0.147181	0.107023	0.103383
R-HSA-8852135	Protein ubiquitination	0.175572	0.182329	0.184138	0.164559	0.174788	0.168444	0.170561	0.18681
R-HSA-8852276	The role of GTSE1 in G2/M progression after G2 checkpoint	0.167964	0.188735	0.192793	0.181065	0.186626	0.18327	0.186905	0.197703
R-HSA-8852405	Signaling by MST1	0.0454484	-0.141251	0.159396	-0.0828066	0.0633658	0.0503639	0.0003166	0.0291545
R-HSA-8853383	Lysosomal oligosaccharide catabolism	0.0927981	-0.0135648	-0.0648612	0.169034	0.19452	0.137806	0.0282702	-0.0179822
R-HSA-8853659	RET signaling	0.0875249	0.125419	0.093713	0.121113	0.1316	0.134409	0.122727	0.122207
R-HSA-8853884	Transcriptional Regulation by VENTX	0.144964	0.177624	0.168744	0.173609	0.167947	0.173439	0.17698	0.169326
R-HSA-8854050	FBXL7 down-regulates AURKA during mitotic entry and in early mitosis	0.197783	0.203851	0.207621	0.201044	0.201406	0.18621	0.205493	0.213874
R-HSA-8854214	TBC/RABGAPs	0.136048	0.130127	0.129489	0.138179	0.143729	0.150008	0.143213	0.14637
R-HSA-8854518	AURKA Activation by TPX2	0.115739	0.154383	0.151926	0.136294	0.146188	0.141067	0.151109	0.156831
R-HSA-8854521	Interaction between PHLDA1 and AURKA	0.101347	0.145995	0.207073	0.149384	0.159943	0.132157	0.147065	0.157733
R-HSA-8854691	Interleukin-20 family signaling	0.123986	0.159718	0.134443	0.146763	0.15138	0.17122	0.148842	0.145222
R-HSA-8856688	Golgi-to-ER retrograde transport	0.139097	0.134861	0.152757	0.140626	0.13441	0.126718	0.138039	0.138827
R-HSA-8857538	PTK6 promotes HIF1A stabilization	0.197373	0.228118	0.232536	0.221513	0.234	0.22039	0.224396	0.232343
R-HSA-8863795	Downregulation of ERBB2 signaling	0.171791	0.202251	0.196564	0.196732	0.207889	0.202764	0.1972	0.20443
R-HSA-8865999	MET activates PTPN11	0.0223274	0.109496	0.016606	0.0697694	0.0853831	0.136351	0.0858951	0.0552963
R-HSA-8866376	Reelin signalling pathway	0.0974305	0.136716	0.115131	0.137304	0.155422	0.160978	0.137011	0.146127
R-HSA-8866423	VLDL assembly	0.140475	0.102993	0.152427	0.125016	0.130332	0.109033	0.108324	0.130503
R-HSA-8866427	VLDLR internalisation and degradation	0.160656	0.203061	0.163997	0.192702	0.190317	0.190787	0.196609	0.179691
R-HSA-8866652	Synthesis of active ubiquitin: roles of E1 and E2 enzymes	0.191417	0.222698	0.202206	0.201973	0.197336	0.205289	0.213725	0.212877
R-HSA-8866654	E3 ubiquitin ligases ubiquitinate target proteins	0.178092	0.182739	0.182139	0.168073	0.176396	0.168927	0.170191	0.185847
R-HSA-8866904	Negative regulation of activity of TFAP2 (AP-2) family transcription factors	0.121405	0.129307	0.131498	0.128939	0.122594	0.140674	0.149821	0.162635
R-HSA-8866906	TFAP2 (AP-2) family regulates transcription of other transcription factors	0.23217	0.202933	0.243488	0.254472	0.207861	0.234406	0.268826	0.205425
R-HSA-8866907	Activation of the TFAP2 (AP-2) family of transcription factors	0.190056	0.192268	0.177365	0.181713	0.187858	0.205585	0.189821	0.204629
R-HSA-8866910	TFAP2 (AP-2) family regulates transcription of growth factors and their receptors	0.204939	0.24237	0.238755	0.231214	0.234254	0.230333	0.236756	0.238559
R-HSA-8866911	TFAP2 (AP-2) family regulates transcription of cell cycle factors	0.181453	0.185898	0.223677	0.175084	0.187741	0.166846	0.185127	0.214714
R-HSA-8868766	rRNA processing in the mitochondrion	0.131131	0.113879	0.118545	0.0974572	0.125164	0.10784	0.071178	0.131554
R-HSA-8868773	rRNA processing in the nucleus and cytosol	0.19417	0.212724	0.202119	0.198891	0.194803	0.190095	0.208625	0.210319
R-HSA-8869496	TFAP2A acts as a transcriptional repressor during retinoic acid induced cell differentiation	0.0850643	0.0698377	0.135084	0.068684	0.0810489	0.0680503	0.093869	0.10432
R-HSA-8873719	RAB geranylgeranylation	0.121323	0.112923	0.120578	0.12686	0.117069	0.108013	0.132173	0.115414
R-HSA-8874081	MET activates PTK2 signaling	0.125085	0.215322	0.189639	0.20804	0.189378	0.216546	0.194361	0.148754
R-HSA-8874177	ATF6B (ATF6-beta) activates chaperones	0.233995	0.201287	0.216125	0.247248	0.227862	0.276859	0.23661	0.218021
R-HSA-8874211	CREB3 factors activate genes	0.133882	0.0774276	0.088935	0.104382	0.123669	0.0920802	0.0799981	0.0912583
R-HSA-8875513	MET interacts with TNS proteins	0.0521472	0.181928	0.153967	0.142414	0.172476	0.189495	0.173486	0.112054
R-HSA-8875555	MET activates RAP1 and RAC1	0.107785	0.156227	0.104466	0.129209	0.164058	0.177747	0.132168	0.153134
R-HSA-8875656	MET receptor recycling	0.0742522	0.143728	0.0829064	0.126676	0.136522	0.151231	0.128849	0.127907
R-HSA-8875791	MET activates STAT3	0.128635	0.173037	0.144839	0.162543	0.179262	0.190403	0.170129	0.136882
R-HSA-8875878	MET promotes cell motility	0.125924	0.184498	0.152911	0.172618	0.17811	0.199413	0.161462	0.156636
R-HSA-8876198	RAB GEFs exchange GTP for GDP on RABs	0.122787	0.157924	0.134697	0.145854	0.152863	0.155811	0.152155	0.145979
R-HSA-8876725	Protein methylation	0.163034	0.164675	0.144761	0.155129	0.170077	0.160587	0.159655	0.1673
R-HSA-8877330	RUNX1 and FOXP3 control the development of regulatory T lymphocytes (Tregs)	0.110743	0.101609	0.0790696	0.109593	0.146326	0.124984	0.100019	0.214973
R-HSA-8877627	Vitamin E	0.00818849	-0.0483204	0.0284008	-0.0284306	-0.0298052	-0.0414177	-0.0158064	-0.0290986
R-HSA-888568	GABA synthesis	0.0237155	-0.00340276	0.110314	0.0713653	0.0362338	0.0212525	0.0309762	0.041264
R-HSA-888590	GABA synthesis, release, reuptake and degradation	0.11724	0.105735	0.104101	0.107371	0.121595	0.104625	0.100224	0.124873
R-HSA-888593	Reuptake of GABA	-0.0420136	-0.13413	-0.110472	-0.159621	-0.0698503	-0.00695537	-0.147955	-0.0879244
R-HSA-8931987	RUNX1 regulates estrogen receptor mediated transcription	0.241819	0.276271	0.270583	0.258843	0.255646	0.249764	0.27134	0.270333
R-HSA-8934593	Regulation of RUNX1 Expression and Activity	0.138227	0.19432	0.169016	0.163894	0.170851	0.184379	0.164746	0.169522
R-HSA-8934903	Receptor Mediated Mitophagy	0.168116	0.187975	0.168641	0.179304	0.174095	0.196158	0.189141	0.18865
R-HSA-8935690	Digestion	-0.107191	-0.103366	-0.0622993	-0.0996322	-0.115084	-0.0688115	-0.129256	-0.0827153
R-HSA-8935964	RUNX1 regulates expression of components of tight junctions	0.0825698	0.112256	0.113224	0.112447	0.10503	0.1132	0.123366	0.0722283
R-HSA-8936459	RUNX1 regulates genes involved in megakaryocyte differentiation and platelet function	0.150073	0.168938	0.152906	0.168273	0.150689	0.153771	0.173245	0.185757
R-HSA-8937144	Aryl hydrocarbon receptor signalling	0.0707529	0.0942187	0.0934302	0.0845143	0.101798	0.117248	0.0885419	0.109448
R-HSA-8939236	RUNX1 regulates transcription of genes involved in differentiation of HSCs	0.175485	0.194993	0.196183	0.193248	0.178977	0.177442	0.199659	0.193545
R-HSA-8939242	RUNX1 regulates transcription of genes involved in differentiation of keratinocytes	0.146725	0.210202	0.144226	0.18824	0.159047	0.131251	0.176815	0.128446
R-HSA-8939243	RUNX1 interacts with co-factors whose precise effect on RUNX1 targets is not known	0.199827	0.234	0.206415	0.220365	0.214178	0.215026	0.224132	0.231506
R-HSA-8939245	RUNX1 regulates transcription of genes involved in BCR signaling	0.136112	0.135895	0.13947	0.123713	0.140137	0.147903	0.130208	0.161789
R-HSA-8939246	RUNX1 regulates transcription of genes involved in differentiation of myeloid cells	0.122453	0.140014	0.0955643	0.135906	0.166653	0.18017	0.122149	0.150825
R-HSA-8939247	RUNX1 regulates transcription of genes involved in interleukin signaling	0.171531	0.226366	0.135413	0.137683	0.18792	0.211217	0.174168	0.160662
R-HSA-8939256	RUNX1 regulates transcription of genes involved in WNT signaling	0.248487	0.282823	0.274379	0.269424	0.258954	0.255145	0.280464	0.281015
R-HSA-8939902	Regulation of RUNX2 expression and activity	0.220723	0.23843	0.2364	0.231601	0.231519	0.216764	0.23932	0.242903
R-HSA-8940973	RUNX2 regulates osteoblast differentiation	0.134569	0.192209	0.176334	0.174392	0.16508	0.176979	0.176362	0.169718
R-HSA-8941237	Invadopodia formation	0.0842647	0.104883	0.060092	0.120347	0.199309	0.24334	0.0674462	0.141419
R-HSA-8941284	RUNX2 regulates chondrocyte maturation	0.168538	0.146494	0.134216	0.219824	0.171801	0.157685	0.203271	0.184805
R-HSA-8941326	RUNX2 regulates bone development	0.132005	0.188576	0.166301	0.175247	0.159177	0.175454	0.176292	0.165581
R-HSA-8941332	RUNX2 regulates genes involved in cell migration	0.179658	0.222246	0.189243	0.227006	0.248577	0.242992	0.218173	0.241163
R-HSA-8941333	RUNX2 regulates genes involved in differentiation of myeloid cells	0.130932	0.114609	0.131626	0.150341	0.17668	0.155089	0.126647	0.16438
R-HSA-8941413	Events associated with phagocytolytic activity of PMN cells	0.456857	0.396489	0.43574	0.457353	0.37322	0.28213	0.458182	0.4263
R-HSA-8941855	RUNX3 regulates CDKN1A transcription	0.156463	0.195544	0.177798	0.1815	0.181634	0.199728	0.188531	0.181782
R-HSA-8941856	RUNX3 regulates NOTCH signaling	0.169173	0.199205	0.173688	0.183991	0.185239	0.196275	0.19627	0.199847
R-HSA-8941858	Regulation of RUNX3 expression and activity	0.211645	0.241173	0.226154	0.221783	0.229897	0.223953	0.222161	0.229819
R-HSA-8943723	Regulation of PTEN mRNA translation	0.188981	0.240219	0.192333	0.224123	0.192926	0.199282	0.239488	0.185353
R-HSA-8943724	Regulation of PTEN gene transcription	0.161519	0.19494	0.179248	0.188227	0.179922	0.18989	0.192884	0.192507
R-HSA-8948216	Collagen chain trimerization	0.153255	0.163004	0.138008	0.25819	0.118729	0.170083	0.213857	0.0951641
R-HSA-8948700	Competing endogenous RNAs (ceRNAs) regulate PTEN translation	0.212014	0.256086	0.219226	0.233921	0.233175	0.222901	0.253561	0.226389
R-HSA-8948747	Regulation of PTEN localization	0.192681	0.213706	0.191968	0.212176	0.190277	0.203607	0.212209	0.19721
R-HSA-8948751	Regulation of PTEN stability and activity	0.162243	0.175395	0.170295	0.169069	0.168528	0.159274	0.172709	0.178516
R-HSA-8949215	Mitochondrial calcium ion transport	0.17775	0.213543	0.226087	0.219224	0.223601	0.154483	0.226134	0.215968
R-HSA-8949275	RUNX3 Regulates Immune Response and Cell Migration	0.190688	0.183654	0.135216	0.192585	0.271023	0.262438	0.195364	0.210736
R-HSA-8949613	Cristae formation	0.152321	0.129067	0.16562	0.146939	0.131566	0.127665	0.149028	0.142259
R-HSA-8949664	Processing of SMDT1	0.133914	0.182238	0.167216	0.185251	0.171871	0.112472	0.191276	0.160821
R-HSA-8950505	Gene and protein expression by JAK-STAT signaling after Interleukin-12 stimulation	0.182605	0.196893	0.192439	0.1859	0.211706	0.195707	0.190468	0.210087
R-HSA-8951430	RUNX3 regulates WNT signaling	0.161646	0.217427	0.21071	0.200073	0.190077	0.186075	0.204674	0.20297
R-HSA-8951671	RUNX3 regulates YAP1-mediated transcription	0.107623	0.16739	0.166378	0.168642	0.107142	0.152737	0.178012	0.119224
R-HSA-8951911	RUNX3 regulates RUNX1-mediated transcription	0.221877	0.277037	0.255165	0.277633	0.294587	0.282796	0.297607	0.25142
R-HSA-8951936	RUNX3 regulates p14-ARF	0.189745	0.20984	0.180203	0.210113	0.203087	0.223149	0.211802	0.201128
R-HSA-8952158	RUNX3 regulates BCL2L11 (BIM) transcription	0.17339	0.237197	0.184183	0.213857	0.212428	0.243163	0.221189	0.200495
R-HSA-8953750	Transcriptional Regulation by E2F6	0.118348	0.139292	0.139292	0.131585	0.127184	0.126649	0.143165	0.159766
R-HSA-8955332	Carboxyterminal post-translational modifications of tubulin	0.110976	0.152035	0.14264	0.1557	0.13458	0.139692	0.163879	0.118503
R-HSA-8956319	Nucleotide catabolism	0.0649214	0.0969379	0.0935896	0.104517	0.112851	0.0921423	0.0951765	0.101608
R-HSA-8956320	Nucleotide biosynthesis	0.0711255	0.097122	0.132627	0.107302	0.0892942	0.0539558	0.128181	0.10691
R-HSA-8956321	Nucleotide salvage	0.135458	0.153657	0.178773	0.126663	0.167912	0.149299	0.117546	0.150358
R-HSA-8957322	Metabolism of steroids	0.115807	0.111919	0.115833	0.114337	0.127488	0.116582	0.100559	0.122367
R-HSA-8963676	Intestinal absorption	0.0874677	0.0469308	0.0975997	0.124769	0.093498	0.0619873	0.0691457	0.0757266
R-HSA-8963678	Intestinal lipid absorption	-0.37678	-0.352683	-0.516231	-0.488904	-0.46729	-0.299934	-0.42688	-0.507122
R-HSA-8963684	Tyrosine catabolism	-0.0896727	-0.123242	0.0432124	0.00217414	-0.0476972	-0.244601	-0.0414604	-0.092992
R-HSA-8963691	Phenylalanine and tyrosine metabolism	0.0945823	0.0709831	0.155594	0.113613	0.113752	0.0236252	0.0880513	0.0588603
R-HSA-8963693	Aspartate and asparagine metabolism	-0.0605461	-0.0807378	0.0027035	-0.0329941	-0.0886662	-0.096672	-0.0254084	-0.0988497
R-HSA-8963743	Digestion and absorption	-0.0111564	-0.0311518	0.0128277	0.0119619	-0.0117568	-0.00591174	-0.032	-0.00584086
R-HSA-8963888	Chylomicron assembly	0.0986409	0.111604	0.124043	0.145056	0.117109	0.106482	0.121384	0.100163
R-HSA-8963889	Assembly of active LPL and LIPC lipase complexes	0.112733	0.105258	0.116227	0.126901	0.117191	0.0948082	0.111561	0.0871689
R-HSA-8963896	HDL assembly	0.14541	0.200397	0.178245	0.209805	0.220611	0.205671	0.226622	0.198201
R-HSA-8963898	Plasma lipoprotein assembly	0.125273	0.143373	0.149425	0.163551	0.161248	0.140792	0.161843	0.143704
R-HSA-8963899	Plasma lipoprotein remodeling	0.105227	0.110602	0.117969	0.140449	0.121011	0.1039	0.121912	0.0951287
R-HSA-8963901	Chylomicron remodeling	0.0928061	0.111291	0.110239	0.153758	0.117031	0.076569	0.131894	0.0798039
R-HSA-8964011	HDL clearance	0.116749	0.202053	0.183595	0.214981	0.206259	0.174475	0.199848	0.100686
R-HSA-8964026	Chylomicron clearance	0.0657333	0.128738	0.0748168	0.124649	0.0993747	0.0664863	0.132709	0.0655769
R-HSA-8964038	LDL clearance	0.124444	0.184566	0.153551	0.167029	0.180688	0.151723	0.162839	0.147784
R-HSA-8964041	LDL remodeling	0.116168	0.106006	0.128433	0.13153	0.110027	0.125829	0.100817	0.13527
R-HSA-8964043	Plasma lipoprotein clearance	0.143907	0.179617	0.152958	0.173669	0.176172	0.159222	0.175082	0.151421
R-HSA-8964046	VLDL clearance	0.17615	0.132023	0.192328	0.144655	0.174979	0.11977	0.140839	0.143041
R-HSA-8964058	HDL remodeling	0.0781622	0.133815	0.098744	0.172111	0.127109	0.109878	0.161576	0.0710584
R-HSA-8964208	Phenylalanine metabolism	0.187482	0.162098	0.214629	0.171783	0.194338	0.143819	0.155368	0.130807
R-HSA-8964315	G beta:gamma signalling through BTK	0.17554	0.154807	0.148313	0.150135	0.170596	0.162835	0.154757	0.148543
R-HSA-8964539	Glutamate and glutamine metabolism	0.149765	0.141253	0.189865	0.175671	0.147415	0.101079	0.158856	0.132164
R-HSA-8964540	Alanine metabolism	0.120404	-0.311941	-0.0953958	-0.339765	-0.182014	-0.492713	-0.30954	-0.269957
R-HSA-8964572	Lipid particle organization	0.105508	0.0590053	0.080798	0.0744909	0.0920958	0.0721514	0.0595684	0.0516743
R-HSA-8964616	G beta:gamma signalling through CDC42	0.112789	0.146824	0.13283	0.138794	0.148285	0.153736	0.135065	0.14385
R-HSA-8978868	Fatty acid metabolism	0.0657206	0.0637069	0.0725977	0.0671193	0.070219	0.0606598	0.0656518	0.0589696
R-HSA-8978934	Metabolism of cofactors	0.143632	0.156629	0.13599	0.137448	0.160452	0.154283	0.141801	0.174251
R-HSA-8979227	Triglyceride metabolism	0.136318	0.16781	0.168967	0.16382	0.166834	0.162827	0.179157	0.167863
R-HSA-8980692	RHOA GTPase cycle	0.102968	0.139022	0.12824	0.123922	0.128504	0.13532	0.124661	0.119998
R-HSA-8981373	Intestinal hexose absorption	0.111311	0.0718234	0.120742	0.151106	0.118806	0.0846994	0.095551	0.098264
R-HSA-8981607	Intracellular oxygen transport	-0.378233	-0.0158238	-0.298729	0.0799721	-0.290194	-0.27755	-0.15649	-0.394484
R-HSA-8982491	Glycogen metabolism	0.198232	0.227107	0.213597	0.227303	0.217891	0.217599	0.229798	0.208462
R-HSA-8983432	Interleukin-15 signaling	0.117078	0.164332	0.126748	0.141821	0.158142	0.174354	0.1446	0.151136
R-HSA-8983711	OAS antiviral response	0.125869	0.232069	0.183636	0.153534	0.19651	0.183969	0.160752	0.183902
R-HSA-8984722	Interleukin-35 Signalling	0.145114	0.158339	0.147639	0.162786	0.179525	0.195477	0.165367	0.145401
R-HSA-8985586	SLIT2:ROBO1 increases RHOA activity	0.158178	0.213276	0.180635	0.215527	0.162487	0.210236	0.211009	0.197144
R-HSA-8985801	Regulation of cortical dendrite branching	-0.0288184	0.0217395	0.0140685	0.0265261	0.0173377	0.0324277	0.0409978	0.0155292
R-HSA-8985947	Interleukin-9 signaling	0.174488	0.201955	0.183923	0.198729	0.206577	0.216497	0.203186	0.20518
R-HSA-9006115	Signaling by NTRK2 (TRKB)	0.0708651	0.109474	0.0942047	0.0880728	0.123043	0.124455	0.0877604	0.118172
R-HSA-9006335	Signaling by Erythropoietin	0.0865083	0.133958	0.0887311	0.115524	0.160732	0.177346	0.113161	0.146968
R-HSA-9007101	Rab regulation of trafficking	0.122717	0.138945	0.128361	0.135568	0.142514	0.148053	0.142047	0.140283
R-HSA-9007892	Interleukin-38 signaling	0.176322	0.198288	0.210003	0.236057	0.195211	0.244715	0.26148	0.222552
R-HSA-9008059	Interleukin-37 signaling	0.121142	0.162546	0.135151	0.143777	0.162046	0.193835	0.141177	0.154739
R-HSA-901032	ER Quality Control Compartment (ERQC)	0.24895	0.250357	0.228537	0.254874	0.24071	0.249257	0.251513	0.236948
R-HSA-901042	Calnexin/calreticulin cycle	0.210709	0.212789	0.209521	0.218693	0.220493	0.217875	0.214083	0.206221
R-HSA-9010553	Regulation of expression of SLITs and ROBOs	0.255783	0.274528	0.265758	0.271172	0.26043	0.250899	0.276504	0.271963
R-HSA-9010642	ROBO receptors bind AKAP5	0.12163	0.141594	0.124228	0.161123	0.155745	0.131234	0.167689	0.138714
R-HSA-9012546	Interleukin-18 signaling	-0.0330256	0.0168104	0.0395406	0.0136165	0.0636244	0.0785275	-0.0111554	-0.00780987
R-HSA-9012852	Signaling by NOTCH3	0.176543	0.209948	0.198094	0.199126	0.202602	0.206254	0.205654	0.203532
R-HSA-9013026	RHOB GTPase cycle	0.0870648	0.136432	0.127625	0.118121	0.119804	0.129966	0.122425	0.111414
R-HSA-9013106	RHOC GTPase cycle	0.102014	0.146792	0.135138	0.130197	0.131703	0.138701	0.134149	0.12496
R-HSA-9013148	CDC42 GTPase cycle	0.0937872	0.159752	0.134154	0.136273	0.147032	0.158695	0.136856	0.130498
R-HSA-9013149	RAC1 GTPase cycle	0.101606	0.156548	0.129692	0.129184	0.146338	0.160366	0.131042	0.136376
R-HSA-9013404	RAC2 GTPase cycle	0.12377	0.161871	0.146323	0.145275	0.157875	0.165502	0.14509	0.14033
R-HSA-9013405	RHOD GTPase cycle	0.109496	0.145212	0.136548	0.133233	0.128162	0.131659	0.136437	0.117807
R-HSA-9013407	RHOH GTPase cycle	0.138089	0.166305	0.153314	0.1496	0.178863	0.169648	0.147371	0.167866
R-HSA-9013408	RHOG GTPase cycle	0.144897	0.178543	0.170802	0.173034	0.172812	0.1717	0.173932	0.15504
R-HSA-9013409	RHOJ GTPase cycle	0.111309	0.156102	0.138781	0.145829	0.155309	0.146151	0.139187	0.132454
R-HSA-9013418	RHOBTB2 GTPase cycle	0.146312	0.184463	0.171037	0.16897	0.169338	0.168978	0.177756	0.17471
R-HSA-9013419	RHOT2 GTPase cycle	0.0974549	0.0964338	0.161363	0.116386	0.130589	0.118493	0.137411	0.137398
R-HSA-9013420	RHOU GTPase cycle	0.0732744	0.11451	0.0969506	0.100448	0.106628	0.10912	0.104365	0.109877
R-HSA-9013422	RHOBTB1 GTPase cycle	0.154838	0.203576	0.182064	0.202036	0.17869	0.17918	0.209246	0.183271
R-HSA-9013423	RAC3 GTPase cycle	0.125778	0.166208	0.146267	0.15104	0.162413	0.168826	0.152204	0.141122
R-HSA-9013424	RHOV GTPase cycle	0.0674402	0.12459	0.101619	0.108964	0.117869	0.129409	0.117282	0.120076
R-HSA-9013425	RHOT1 GTPase cycle	0.15608	0.171496	0.197373	0.183274	0.172208	0.145866	0.203804	0.169055
R-HSA-9013507	NOTCH3 Activation and Transmission of Signal to the Nucleus	0.18777	0.217942	0.214883	0.210496	0.217891	0.216091	0.211821	0.211935
R-HSA-9013508	NOTCH3 Intracellular Domain Regulates Transcription	0.151895	0.191173	0.170152	0.178096	0.168159	0.186435	0.195876	0.181828
R-HSA-9013694	Signaling by NOTCH4	0.168374	0.202094	0.184918	0.184072	0.185601	0.187062	0.195704	0.193808
R-HSA-9013695	NOTCH4 Intracellular Domain Regulates Transcription	0.145644	0.193996	0.155115	0.167583	0.1682	0.183818	0.181047	0.180657
R-HSA-9013700	NOTCH4 Activation and Transmission of Signal to the Nucleus	0.127383	0.197096	0.170075	0.165008	0.158405	0.172375	0.183323	0.152675
R-HSA-9013957	TLR3-mediated TICAM1-dependent programmed cell death	0.197967	0.202994	0.188214	0.154801	0.235307	0.2336	0.149495	0.235036
R-HSA-9013973	TICAM1-dependent activation of IRF3/IRF7	0.154365	0.169677	0.152536	0.161461	0.16395	0.160987	0.163554	0.167248
R-HSA-9014325	TICAM1,TRAF6-dependent induction of TAK1 complex	0.191162	0.205543	0.192491	0.198005	0.204351	0.216205	0.197051	0.202524
R-HSA-9014826	Interleukin-36 pathway	0.0256983	0.0489318	0.0947963	0.00557436	0.0461622	0.156821	0.0145694	0.0259797
R-HSA-9014843	Interleukin-33 signaling	-0.0713901	0.0483882	0.0589202	0.116686	0.109257	0.234049	-0.054403	-0.0321074
R-HSA-9017802	Noncanonical activation of NOTCH3	0.271968	0.271991	0.294154	0.267014	0.273863	0.271134	0.270665	0.292125
R-HSA-9018676	Biosynthesis of D-series resolvins	0.0559855	0.105492	0.0639403	0.0885923	0.136582	0.107362	0.0604535	0.0740442
R-HSA-9018677	Biosynthesis of DHA-derived SPMs	0.0466652	0.0988156	0.0700982	0.100991	0.0919162	0.0728282	0.0505523	0.0355511
R-HSA-9018678	Biosynthesis of specialized proresolving mediators (SPMs)	0.0335793	0.0812966	0.0605226	0.0996961	0.0979591	0.0987372	0.0430251	0.038327
R-HSA-9018679	Biosynthesis of EPA-derived SPMs	0.0723901	0.145266	0.0979459	0.137435	0.154266	0.136308	0.0935318	0.0841562
R-HSA-9018681	Biosynthesis of protectins	0.115445	0.103466	0.127302	0.116086	0.139996	0.130472	0.131407	0.107429
R-HSA-9018682	Biosynthesis of maresins	-0.0132768	0.0428619	0.011969	0.00539928	0.0500679	0.0281203	-0.0191224	-0.0151771
R-HSA-9018683	Biosynthesis of DPA-derived SPMs	0.047034	0.150953	0.086196	0.112551	0.135631	0.114641	0.0622583	0.0581924
R-HSA-9018896	Biosynthesis of E-series 18(S)-resolvins	0.0631569	0.115359	0.0726215	0.10329	0.135904	0.104624	0.0739078	0.0831272
R-HSA-9020265	Biosynthesis of aspirin-triggered D-series resolvins	0.0533898	0.122863	0.0715391	0.0717033	0.143145	0.114932	0.0488987	0.0654215
R-HSA-9020558	Interleukin-2 signaling	0.109459	0.164749	0.127001	0.132465	0.190724	0.210699	0.12249	0.233803
R-HSA-9020591	Interleukin-12 signaling	0.177871	0.185735	0.18699	0.177838	0.201207	0.189613	0.178773	0.201559
R-HSA-9020933	Interleukin-23 signaling	0.134733	0.137937	0.142443	0.151205	0.152694	0.171362	0.139366	0.142838
R-HSA-9020956	Interleukin-27 signaling	0.147653	0.15781	0.153582	0.167005	0.183311	0.198916	0.169566	0.14356
R-HSA-9020958	Interleukin-21 signaling	0.165752	0.200894	0.1757	0.191802	0.203476	0.218548	0.196811	0.199333
R-HSA-9022699	MECP2 regulates neuronal receptors and channels	0.127765	0.183294	0.158682	0.168354	0.156801	0.158786	0.181646	0.179966
R-HSA-9022702	MECP2 regulates transcription of neuronal ligands	0.155593	0.208082	0.175288	0.201299	0.173435	0.176179	0.203962	0.212488
R-HSA-9022707	MECP2 regulates transcription factors	0.113848	0.228038	0.0946633	0.237554	0.145957	0.186929	0.274666	0.122361
R-HSA-9022927	MECP2 regulates transcription of genes involved in GABA signaling	0.0332127	0.00990718	0.109976	0.078351	0.0466785	0.0399269	0.0442523	0.0582876
R-HSA-9023661	Biosynthesis of E-series 18(R)-resolvins	0.0611671	0.131794	0.0798979	0.088551	0.141832	0.111398	0.0640827	0.0757822
R-HSA-9024446	NR1H2 and NR1H3-mediated signaling	0.10843	0.13261	0.12754	0.133549	0.13057	0.135172	0.138569	0.123045
R-HSA-9024909	BDNF activates NTRK2 (TRKB) signaling	-0.282976	-0.191818	-0.0303929	0.00174131	-0.214348	-0.126405	0.154247	-0.224671
R-HSA-9025046	NTF3 activates NTRK2 (TRKB) signaling	-0.310637	-0.178392	-0.0335269	0.0231709	-0.205955	-0.101568	0.185714	-0.199604
R-HSA-9025094	Biosynthesis of DPAn-3 SPMs	0.047034	0.150953	0.086196	0.112551	0.135631	0.114641	0.0622583	0.0581924
R-HSA-9025106	Biosynthesis of DPAn-6 SPMs	0.167091	0.28985	0.183642	0.278352	0.153097	0.117131	0.223933	0.183324
R-HSA-9026286	Biosynthesis of DPAn-3-derived protectins and resolvins	0.0163261	0.100367	0.0387227	0.054302	0.107334	0.0699144	0.0192887	0.0389373
R-HSA-9026290	Biosynthesis of DPAn-3-derived maresins	0.0239295	0.108614	0.046903	0.0532073	0.112331	0.07841	0.0189976	0.0415654
R-HSA-9026357	NTF4 activates NTRK2 (TRKB) signaling	-0.162305	-0.107988	0.0518538	0.0459862	-0.115148	-0.0736052	0.177485	-0.125433
R-HSA-9026395	Biosynthesis of DHA-derived sulfido conjugates	0.0583028	0.0976415	0.0495916	0.145246	0.0551681	0.0116284	-0.0144868	-0.00478723
R-HSA-9026403	Biosynthesis of DPAn-3-derived 13-series resolvins	0.0022414	0.0871195	0.0237201	0.0317983	0.104875	0.0693999	-0.00284699	0.0229409
R-HSA-9026519	Activated NTRK2 signals through RAS	0.115467	0.169191	0.149211	0.165226	0.166885	0.167975	0.180684	0.146652
R-HSA-9026527	Activated NTRK2 signals through PLCG1	-0.0287913	0.0550883	-0.0106589	0.0843379	0.0835034	0.109162	0.0859361	0.0509335
R-HSA-9026762	Biosynthesis of maresin conjugates in tissue regeneration (MCTR)	0.0583028	0.0976415	0.0495916	0.145246	0.0551681	0.0116284	-0.0144868	-0.00478723
R-HSA-9026766	Biosynthesis of protectin and resolvin conjugates in tissue regeneration (PCTR and RCTR)	0.114023	0.0517763	-0.00752623	0.136151	0.0317188	-0.007147	-0.0995477	-0.0177224
R-HSA-9027276	Erythropoietin activates Phosphoinositide-3-kinase (PI3K)	0.109219	0.124383	0.0841774	0.119343	0.181476	0.207119	0.118206	0.157163
R-HSA-9027277	Erythropoietin activates Phospholipase C gamma (PLCG)	0.104243	0.137159	0.0906806	0.13301	0.209921	0.21448	0.109965	0.150661
R-HSA-9027283	Erythropoietin activates STAT5	0.122657	0.170684	0.13399	0.159216	0.236868	0.249722	0.155364	0.18587
R-HSA-9027284	Erythropoietin activates RAS	0.123501	0.175808	0.123534	0.150253	0.200922	0.214328	0.139954	0.158457
R-HSA-9027307	Biosynthesis of maresin-like SPMs	-0.0535633	-0.0832988	-0.00106073	-0.0472064	-0.0656417	-0.0474076	-0.0597397	-0.0883872
R-HSA-9027604	Biosynthesis of electrophilic 蠅-3 PUFA oxo-derivatives	0.0211539	0.128211	0.0632381	0.0842743	0.132091	0.114152	0.0318429	0.031563
R-HSA-9028335	Activated NTRK2 signals through PI3K	0.0623876	0.0856546	0.0523869	0.0955125	0.106219	0.142271	0.122369	0.110538
R-HSA-9028731	Activated NTRK2 signals through FRS2 and FRS3	0.0324549	0.0812512	0.0448948	0.073118	0.0663693	0.0898249	0.0775093	0.0474124
R-HSA-9029558	NR1H2 & NR1H3 regulate gene expression linked to lipogenesis	0.0977059	0.118265	0.138006	0.132037	0.123045	0.10968	0.129477	0.109238
R-HSA-9029569	NR1H3 & NR1H2 regulate gene expression linked to cholesterol transport and efflux	0.12219	0.146734	0.1431	0.151579	0.142893	0.149795	0.153889	0.137619
R-HSA-9031525	NR1H2 & NR1H3 regulate gene expression to limit cholesterol uptake	0.0619653	0.116239	0.062619	0.0958718	0.115445	0.115958	0.108859	0.0827708
R-HSA-9031528	NR1H2 & NR1H3 regulate gene expression linked to triglyceride lipolysis in adipose	0.0964577	0.139039	0.139056	0.126279	0.151762	0.134567	0.121476	0.139617
R-HSA-9031628	NGF-stimulated transcription	0.125138	0.156588	0.151221	0.148457	0.136745	0.140093	0.156713	0.151593
R-HSA-9032500	Activated NTRK2 signals through FYN	0.110303	0.176366	0.153335	0.12705	0.17653	0.184726	0.132583	0.162561
R-HSA-9032759	NTRK2 activates RAC1	0.116992	0.148707	0.130465	0.126152	0.180337	0.184261	0.137068	0.167851
R-HSA-9032845	Activated NTRK2 signals through CDK5	0.118512	0.134296	0.153654	0.119925	0.169373	0.139626	0.125981	0.16648
R-HSA-9033241	Peroxisomal protein import	0.131867	0.138614	0.125119	0.128792	0.128936	0.120302	0.138592	0.131804
R-HSA-9033500	TYSND1 cleaves peroxisomal proteins	0.0312256	0.0517171	0.0329484	0.00137874	0.0907922	0.0433662	0.0307994	0.0422
R-HSA-9033658	Blood group systems biosynthesis	-0.0817191	-0.071122	-0.0332405	-0.0522437	-0.06916	-0.0419601	-0.0795427	-0.0880049
R-HSA-9033807	ABO blood group biosynthesis	-0.0250546	0.0259222	0.104841	0.0169341	0.0184985	0.0142879	0.0171203	0.0119237
R-HSA-9034013	NTF3 activates NTRK3 signaling	0.0528899	0.0635613	0.0803676	0.105899	0.0382455	0.111266	0.178278	-0.00251197
R-HSA-9034015	Signaling by NTRK3 (TRKC)	0.109191	0.149857	0.127122	0.128808	0.161415	0.172327	0.129896	0.144389
R-HSA-9034793	Activated NTRK3 signals through PLCG1	0.0146428	0.080847	0.0248714	0.111024	0.0972444	0.138982	0.116644	0.0616255
R-HSA-9034864	Activated NTRK3 signals through RAS	0.122749	0.167906	0.148787	0.167681	0.16179	0.176922	0.183646	0.137068
R-HSA-9035034	RHOF GTPase cycle	0.110371	0.145953	0.140354	0.140324	0.136755	0.151812	0.144519	0.129096
R-HSA-9036866	Expression and Processing of Neurotrophins	-0.0172847	0.0988641	0.0955463	0.0943157	0.0742025	0.0649893	0.0969041	0.0020978
R-HSA-9037628	Rhesus blood group biosynthesis	-0.290308	-0.478446	-0.471866	-0.471177	-0.423613	-0.375194	-0.464234	-0.412707
R-HSA-9037629	Lewis blood group biosynthesis	-0.0516699	-0.0481842	-0.00841385	-0.0141174	-0.0450552	-0.00704806	-0.0437762	-0.0554405
R-HSA-909733	Interferon alpha/beta signaling	0.212319	0.236254	0.221053	0.204141	0.231877	0.220317	0.206119	0.232603
R-HSA-912446	Meiotic recombination	0.117874	0.112688	0.153997	0.110963	0.112105	0.0829697	0.127348	0.14795
R-HSA-912526	Interleukin receptor SHC signaling	0.107792	0.141306	0.0924188	0.114268	0.159847	0.160522	0.116322	0.142879
R-HSA-912631	Regulation of signaling by CBL	0.129867	0.158733	0.133301	0.153509	0.17128	0.185887	0.146301	0.16764
R-HSA-912694	Regulation of IFNA/IFNB signaling	0.0946778	0.131187	0.102163	0.108325	0.13039	0.157394	0.103272	0.124966
R-HSA-913709	O-linked glycosylation of mucins	-0.0717648	-0.0573635	0.0328687	-0.0778824	-0.0364231	-0.00317127	-0.102306	-0.0214592
R-HSA-916853	Degradation of GABA	-0.317411	-0.248032	-0.19221	-0.288819	-0.273814	-0.125419	-0.26949	-0.154793
R-HSA-917729	Endosomal Sorting Complex Required For Transport (ESCRT)	0.110183	0.128862	0.134125	0.126676	0.123271	0.116337	0.130374	0.125902
R-HSA-917937	Iron uptake and transport	0.154458	0.151831	0.150176	0.158064	0.158389	0.154033	0.154179	0.153966
R-HSA-917977	Transferrin endocytosis and recycling	0.0840096	0.0613911	0.0667351	0.0928628	0.113327	0.12133	0.0780417	0.0692164
R-HSA-918233	TRAF3-dependent IRF activation pathway	0.174381	0.194018	0.169997	0.163863	0.178923	0.187616	0.167077	0.190087
R-HSA-927802	Nonsense-Mediated Decay (NMD)	0.290474	0.317175	0.295393	0.305788	0.298916	0.297159	0.317776	0.314155
R-HSA-933541	TRAF6 mediated IRF7 activation	0.118828	0.138061	0.120423	0.118589	0.126839	0.143824	0.117615	0.140254
R-HSA-933542	TRAF6 mediated NF-kB activation	0.143053	0.165173	0.160987	0.156695	0.168552	0.172571	0.156184	0.168667
R-HSA-933543	NF-kB activation through FADD/RIP-1 pathway mediated by caspase-8 and -10	0.194795	0.214264	0.221888	0.17992	0.235367	0.236112	0.185002	0.246056
R-HSA-936440	Negative regulators of DDX58/IFIH1 signaling	0.143861	0.169847	0.156482	0.148964	0.162365	0.169134	0.152888	0.169562
R-HSA-936837	Ion transport by P-type ATPases	0.087929	0.119958	0.102901	0.125656	0.116573	0.118879	0.136645	0.104864
R-HSA-936964	Activation of IRF3, IRF7 mediated by TBK1, IKK蔚 (IKBKE)	0.142271	0.163577	0.139944	0.15035	0.154302	0.162811	0.150997	0.150528
R-HSA-937039	IRAK1 recruits IKK complex	0.19767	0.20378	0.206089	0.191359	0.212222	0.211799	0.189661	0.213583
R-HSA-937041	IKK complex recruitment mediated by RIP1	0.174395	0.182622	0.180315	0.166774	0.187424	0.195874	0.165549	0.189396
R-HSA-937042	IRAK2 mediated activation of TAK1 complex	0.194784	0.207071	0.195225	0.198532	0.205621	0.219944	0.199019	0.204163
R-HSA-937072	TRAF6-mediated induction of TAK1 complex within TLR4 complex	0.185163	0.197953	0.183405	0.184663	0.200932	0.220832	0.182251	0.187634
R-HSA-947581	Molybdenum cofactor biosynthesis	-0.0281012	-0.00525229	-0.0318551	0.0198285	-0.111149	-0.0642646	0.0423369	-0.060417
R-HSA-948021	Transport to the Golgi and subsequent modification	0.119105	0.108932	0.122543	0.113967	0.112649	0.117049	0.111213	0.116783
R-HSA-9603381	Activated NTRK3 signals through PI3K	0.111308	0.164795	0.134392	0.134518	0.157845	0.187376	0.148109	0.150554
R-HSA-9603505	NTRK3 as a dependence receptor	0.174521	0.145459	0.192072	0.168725	0.198469	0.1904	0.174748	0.151199
R-HSA-9603798	Class I peroxisomal membrane protein import	0.0991645	0.0499249	0.0761812	0.0659546	0.0709882	0.0357114	0.0430416	0.047168
R-HSA-9604323	Negative regulation of NOTCH4 signaling	0.177686	0.206578	0.193208	0.191861	0.19234	0.18975	0.200998	0.1998
R-HSA-9607240	FLT3 Signaling	0.130933	0.158267	0.139231	0.144821	0.180421	0.185312	0.146071	0.185986
R-HSA-9609523	Insertion of tail-anchored proteins into the endoplasmic reticulum membrane	0.138624	0.155845	0.148838	0.156452	0.154492	0.149412	0.154178	0.150183
R-HSA-9609736	Assembly and cell surface presentation of NMDA receptors	0.0737066	0.0926817	0.0909339	0.100727	0.0664119	0.0759098	0.100133	0.0794419
R-HSA-9613354	Lipophagy	0.128968	0.130823	0.13411	0.151539	0.136056	0.137115	0.151395	0.140048
R-HSA-9614399	Regulation of localization of FOXO transcription factors	0.126745	0.191815	0.165505	0.171297	0.155927	0.175752	0.189282	0.160996
R-HSA-9614657	FOXO-mediated transcription of cell death genes	0.167776	0.172846	0.159864	0.169484	0.175114	0.179419	0.169508	0.187917
R-HSA-9615017	FOXO-mediated transcription of oxidative stress, metabolic and neuronal genes	0.139927	0.180134	0.146556	0.167582	0.152257	0.154487	0.174144	0.167002
R-HSA-9615933	Postmitotic nuclear pore complex (NPC) reformation	0.131933	0.152719	0.154317	0.147738	0.156272	0.149193	0.149101	0.172917
R-HSA-9616222	Transcriptional regulation of granulopoiesis	0.154168	0.165741	0.183975	0.160106	0.163528	0.15585	0.164957	0.180266
R-HSA-9617324	Negative regulation of NMDA receptor-mediated neuronal transmission	0.0675106	0.0840463	0.0757981	0.0840127	0.0680641	0.0714624	0.0849678	0.0805497
R-HSA-9617629	Regulation of FOXO transcriptional activity by acetylation	0.182261	0.20146	0.188151	0.191256	0.201681	0.197216	0.199568	0.199928
R-HSA-9617828	FOXO-mediated transcription of cell cycle genes	0.14471	0.19095	0.18174	0.169876	0.171543	0.194359	0.176503	0.178973
R-HSA-9619229	Activation of RAC1 downstream of NMDARs	0.154636	0.187587	0.15878	0.165328	0.228593	0.213125	0.169748	0.207799
R-HSA-9619483	Activation of AMPK downstream of NMDARs	0.297883	0.311237	0.320906	0.321584	0.306968	0.285649	0.325264	0.313008
R-HSA-9619665	EGR2 and SOX10-mediated initiation of Schwann cell myelination	0.0991098	0.144809	0.131461	0.138679	0.109089	0.124868	0.139325	0.128565
R-HSA-9620244	Long-term potentiation	0.0710268	0.104719	0.0964125	0.0940045	0.0836879	0.0896544	0.0940913	0.0924929
R-HSA-9623433	NR1H2 & NR1H3 regulate gene expression to control bile acid homeostasis	0.147523	0.193704	0.174571	0.210321	0.164572	0.196356	0.210121	0.178884
R-HSA-9627069	Regulation of the apoptosome activity	0.115923	0.145245	0.131206	0.136547	0.138636	0.135596	0.127029	0.141366
R-HSA-9629569	Protein hydroxylation	0.204045	0.214567	0.200909	0.205928	0.186961	0.186829	0.219983	0.21755
R-HSA-9632974	NR1H2 & NR1H3 regulate gene expression linked to gluconeogenesis	0.125727	0.150453	0.144123	0.163652	0.145542	0.129315	0.163323	0.138614
R-HSA-9633012	Response of EIF2AK4 (GCN2) to amino acid deficiency	0.251444	0.267705	0.2575	0.275226	0.262781	0.252842	0.273647	0.263744
R-HSA-9634597	GPER1 signaling	0.11742	0.201974	0.162658	0.178238	0.188643	0.188488	0.184302	0.16225
R-HSA-9634600	Regulation of glycolysis by fructose 2,6-bisphosphate metabolism	0.13281	0.171556	0.161189	0.169562	0.18679	0.171738	0.190242	0.19551
R-HSA-9634635	Estrogen-stimulated signaling through PRKCZ	0.157734	0.169748	0.193139	0.156205	0.190214	0.194774	0.163127	0.19868
R-HSA-9634638	Estrogen-dependent nuclear events downstream of ESR-membrane signaling	0.15302	0.188035	0.185109	0.173314	0.196034	0.193319	0.174722	0.195828
R-HSA-9634815	Transcriptional Regulation by NPAS4	0.130649	0.161862	0.142048	0.143753	0.147818	0.147557	0.149748	0.158824
R-HSA-9636003	NEIL3-mediated resolution of ICLs	-0.349619	-0.513498	-0.322044	-0.523352	-0.352435	0.238655	-0.531716	-0.261096
R-HSA-9639288	Amino acids regulate mTORC1	0.133579	0.120814	0.117057	0.130538	0.153415	0.146838	0.123838	0.135236
R-HSA-9640463	Wax biosynthesis	0.000332423	0.112726	-0.00413365	-0.0105577	0.0301337	0.019839	0.0385378	-0.0509641
R-HSA-9645135	STAT5 Activation	0.0853238	0.176588	0.11674	0.148694	0.149162	0.18378	0.1488	0.15169
R-HSA-9645460	Alpha-protein kinase 1 signaling pathway	0.190615	0.206893	0.194684	0.198863	0.204068	0.214624	0.200969	0.201766
R-HSA-964739	N-glycan trimming and elongation in the cis-Golgi	0.334721	0.257202	0.134138	0.2865	0.239854	0.23432	0.207185	0.202469
R-HSA-9648002	RAS processing	0.208384	0.213586	0.198525	0.202903	0.206165	0.20402	0.198326	0.211129
R-HSA-9648025	EML4 and NUDC in mitotic spindle formation	0.128472	0.146782	0.168242	0.131603	0.145485	0.134877	0.144214	0.169509
R-HSA-964827	Progressive trimming of alpha-1,2-linked mannose residues from Man9/8/7GlcNAc2 to produce Man5GlcNAc2	0.215923	0.204025	0.0760417	0.266376	0.136274	0.131831	0.165913	0.154646
R-HSA-9648895	Response of EIF2AK1 (HRI) to heme deficiency	0.121886	0.14373	0.144749	0.165316	0.141422	0.13631	0.157106	0.135661
R-HSA-964975	Vitamin B6 activation to pyridoxal phosphate	0.120731	-0.0529288	0.0917405	0.0174768	0.149027	0.0877236	-0.0382262	0.0399944
R-HSA-9652282	Drug-mediated inhibition of ERBB2 signaling	0.166771	0.201243	0.200364	0.191556	0.201386	0.196205	0.194805	0.203653
R-HSA-9659379	Sensory processing of sound	0.083294	0.094718	0.0833585	0.0843122	0.0922557	0.085382	0.0902276	0.0877217
R-HSA-9662360	Sensory processing of sound by inner hair cells of the cochlea	0.0814724	0.0944301	0.0857444	0.0895407	0.0955065	0.0810662	0.0916742	0.0885016
R-HSA-9662361	Sensory processing of sound by outer hair cells of the cochlea	0.0922431	0.106403	0.0988742	0.100551	0.105076	0.11141	0.105	0.0979127
R-HSA-9664873	Pexophagy	0.194032	0.207424	0.186044	0.210963	0.204607	0.222198	0.216076	0.210031
R-HSA-9667769	Acetylcholine inhibits contraction of outer hair cells	-0.252543	-0.182453	-0.327458	-0.175053	-0.00971537	-0.0788267	0.148767	-0.362166
R-HSA-9668328	Sealing of the nuclear envelope (NE) by ESCRT-III	0.192679	0.212496	0.232787	0.221447	0.215128	0.209706	0.222639	0.209062
R-HSA-9670095	Inhibition of DNA recombination at telomere	0.166079	0.16672	0.172617	0.166479	0.161777	0.147109	0.175908	0.193877
R-HSA-9673163	Oleoyl-phe metabolism	-0.308711	-0.477973	-0.541818	-0.498758	-0.399553	-0.38887	-0.530308	-0.434001
R-HSA-9674555	Signaling by CSF3 (G-CSF)	0.138487	0.178611	0.141155	0.160256	0.174559	0.186699	0.158935	0.169684
R-HSA-9680350	Signaling by CSF1 (M-CSF) in myeloid cells	0.127025	0.162321	0.135916	0.149928	0.166061	0.179189	0.147863	0.157293
R-HSA-9690406	Transcriptional regulation of testis differentiation	0.0569481	0.109456	0.103809	0.164222	0.0639206	0.0789432	0.13789	0.0448813
R-HSA-9696264	RND3 GTPase cycle	0.112806	0.174862	0.169385	0.167206	0.14947	0.175256	0.179833	0.137177
R-HSA-9696270	RND2 GTPase cycle	0.0754104	0.12486	0.114522	0.126918	0.103374	0.132759	0.135424	0.0940491
R-HSA-9696273	RND1 GTPase cycle	0.0857938	0.128385	0.120585	0.128739	0.109775	0.133518	0.134942	0.10812
R-HSA-9701898	STAT3 nuclear events downstream of ALK signaling	0.179235	0.196939	0.186753	0.195463	0.203337	0.202173	0.197409	0.207707
R-HSA-9705462	Inactivation of CSF3 (G-CSF) signaling	0.164623	0.195522	0.168948	0.189056	0.198245	0.200968	0.186696	0.194434
R-HSA-9706019	RHOBTB3 ATPase cycle	0.091857	0.0972017	0.107693	0.104871	0.0962655	0.0811893	0.105981	0.10091
R-HSA-9706369	Negative regulation of FLT3	0.178237	0.238985	0.190043	0.214124	0.224027	0.238106	0.215661	0.215222
R-HSA-9706374	FLT3 signaling through SRC family kinases	0.10314	0.129562	0.103196	0.134674	0.20683	0.205485	0.111255	0.240345
R-HSA-9706574	RHOBTB GTPase Cycle	0.133883	0.173313	0.156154	0.165635	0.156653	0.159964	0.172885	0.161691
R-HSA-9707564	Cytoprotection by HMOX1	0.176954	0.20063	0.189653	0.193663	0.190457	0.193813	0.193314	0.198955
R-HSA-9707587	Regulation of HMOX1 expression and activity	0.180011	0.183189	0.186201	0.167343	0.170341	0.186787	0.155987	0.184832
R-HSA-9707616	Heme signaling	0.159576	0.183395	0.161984	0.170802	0.164987	0.172514	0.171711	0.164356
R-HSA-9708296	tRNA-derived small RNA (tsRNA or tRNA-related fragment, tRF) biogenesis	0.169118	0.197639	0.199314	0.210331	0.188943	0.163226	0.190661	0.187777
R-HSA-9708530	Regulation of BACH1 activity	0.181375	0.187054	0.175898	0.183254	0.181341	0.178596	0.194702	0.19412
R-HSA-9709957	Sensory Perception	0.064556	0.0750836	0.0731082	0.0768438	0.0698787	0.0640616	0.0768561	0.0587521
R-HSA-9711097	Cellular response to starvation	0.215756	0.221189	0.214323	0.230183	0.23019	0.221627	0.226853	0.22465
R-HSA-9715370	Miro GTPase Cycle	0.105162	0.10816	0.159646	0.121433	0.133171	0.113446	0.144131	0.125264
R-HSA-9717189	Sensory perception of taste	-0.0754275	-0.0762271	-0.0690224	-0.0936359	-0.0855697	-0.0820876	-0.105906	-0.114863
R-HSA-9717207	Sensory perception of sweet, bitter, and umami (glutamate) taste	-0.0817329	-0.117173	-0.108687	-0.117012	-0.100622	-0.122963	-0.128093	-0.139828
R-HSA-9725554	Differentiation of keratinocytes in interfollicular epidermis in mammalian skin	0.107371	0.150432	0.185913	0.154367	0.121352	0.147058	0.148121	0.132166
R-HSA-9729555	Sensory perception of sour taste	-0.0757234	0.0757889	0.045279	0.0438944	0.0452493	0.0994913	0.0341119	0.0299295
R-HSA-9730628	Sensory perception of salty taste	0.0375064	0.0540823	0.0954826	-0.025337	-0.0926796	-0.0420947	-0.0496508	-0.108929
R-HSA-9732724	IFNG signaling activates MAPKs	0.21588	0.249186	0.237869	0.230849	0.252354	0.24474	0.229722	0.264364
R-HSA-9733709	Cardiogenesis	0.0944616	0.143242	0.0990653	0.136548	0.0995364	0.121402	0.146925	0.116613
R-HSA-9734091	Drug-mediated inhibition of MET activation	-0.0317476	0.0880295	0.0447218	0.0290118	0.126745	0.130568	0.092884	0.021321
R-HSA-9734767	Developmental Cell Lineages	0.107371	0.150432	0.185913	0.154367	0.121352	0.147058	0.148121	0.132166
R-HSA-9748784	Drug ADME	0.064277	0.100349	0.0950561	0.0914821	0.134203	0.106798	0.0860452	0.0984774
R-HSA-9748787	Azathioprine ADME	0.118944	0.152356	0.138709	0.132051	0.191007	0.172198	0.140842	0.16881
R-HSA-9749641	Aspirin ADME	0.0614009	0.114466	0.130146	0.107503	0.136707	0.0816767	0.0982154	0.0718915
R-HSA-975110	TRAF6 mediated IRF7 activation in TLR7/8 or 9 signaling	0.190453	0.198504	0.182632	0.185329	0.202996	0.201175	0.185708	0.194963
R-HSA-975144	IRAK1 recruits IKK complex upon TLR7/8 or 9 stimulation	0.19767	0.20378	0.206089	0.191359	0.212222	0.211799	0.189661	0.213583
R-HSA-975163	IRAK2 mediated activation of TAK1 complex upon TLR7/8 or 9 stimulation	0.185163	0.197953	0.183405	0.184663	0.200932	0.220832	0.182251	0.187634
R-HSA-9752946	Expression and translocation of olfactory receptors	0.0292028	0.00918764	0.0547939	0.0123078	0.0170511	0.00456101	0.00589959	-0.0101046
R-HSA-9753281	Paracetamol ADME	-0.0513816	-0.023251	-0.0311073	-0.0420791	-0.0114414	-0.0527886	-0.0715662	-0.0733012
R-HSA-9754119	Drug-mediated inhibition of CDK4/CDK6 activity	0.170488	0.120061	0.187384	0.131992	0.148999	0.135825	0.109781	0.181964
R-HSA-9754189	Germ layer formation at gastrulation	0.0908584	0.174702	0.131551	0.155801	0.121461	0.152664	0.160533	0.125956
R-HSA-9754706	Atorvastatin ADME	-0.0196033	-0.0289641	-0.0283897	-0.0976139	0.0695586	0.0324894	-0.124664	-0.0597332
R-HSA-9755088	Ribavirin ADME	0.114218	0.162496	0.142454	0.148741	0.172531	0.141304	0.129744	0.15149
R-HSA-975574	Reactions specific to the hybrid N-glycan synthesis pathway	-0.24835	0.0156965	0.0854937	-0.0273214	0.0361439	-0.102049	-0.00532693	-0.0592871
R-HSA-975576	N-glycan antennae elongation in the medial/trans-Golgi	0.0470805	0.0328037	0.0799188	0.0269099	0.0437229	0.0349346	-0.0151165	0.0517066
R-HSA-975577	N-Glycan antennae elongation	0.0969188	0.130806	0.115794	0.074466	0.0912903	0.0982163	0.00880202	0.107209
R-HSA-975578	Reactions specific to the complex N-glycan synthesis pathway	0.0381227	-0.0378785	0.0550923	-0.0019134	0.0117329	0.0038249	-0.0330873	0.0233125
R-HSA-975634	Retinoid metabolism and transport	0.077437	0.121987	0.121874	0.149895	0.109383	0.0877419	0.134147	0.0702981
R-HSA-9757110	Prednisone ADME	-0.131616	-0.0747843	-0.061782	-0.0436095	-0.0610989	-0.100461	-0.0805461	-0.163089
R-HSA-9758274	Regulation of NF-kappa B signaling	0.152924	0.16729	0.16099	0.153433	0.160277	0.171816	0.155112	0.17216
R-HSA-9758881	Uptake of dietary cobalamins into enterocytes	-0.106652	-0.0716375	0.00954098	-0.157292	-0.129975	-0.0467214	-0.1644	-0.129319
R-HSA-9758890	Transport of RCbl within the body	0.0571226	0.0913492	0.0647652	-0.0233554	0.0030768	-0.00996648	-0.0177534	0.0252407
R-HSA-9758919	Epithelial-Mesenchymal Transition (EMT) during gastrulation	0.0566805	0.129085	0.121302	0.112298	0.084041	0.0874004	0.126816	0.106668
R-HSA-9758920	Formation of lateral plate mesoderm	-0.180443	-0.0135593	-0.170598	0.160395	-0.25761	-0.0467646	0.015263	-0.20256
R-HSA-9758941	Gastrulation	0.118454	0.157085	0.152072	0.150605	0.134991	0.13987	0.154758	0.142423
R-HSA-9759218	Cobalamin (Cbl) metabolism	0.16681	0.123219	0.160436	0.149042	0.140979	0.138697	0.141853	0.141632
R-HSA-9759475	Regulation of CDH11 Expression and Function	0.0831763	0.142703	0.105365	0.1391	0.107137	0.137178	0.141335	0.111831
R-HSA-9759476	Regulation of Homotypic Cell-Cell Adhesion	0.0804039	0.139276	0.104773	0.138336	0.104944	0.133678	0.140668	0.108373
R-HSA-975956	Nonsense Mediated Decay (NMD) independent of the Exon Junction Complex (EJC)	0.330752	0.354805	0.331982	0.350676	0.34069	0.338394	0.357588	0.353759
R-HSA-975957	Nonsense Mediated Decay (NMD) enhanced by the Exon Junction Complex (EJC)	0.290474	0.317175	0.295393	0.305788	0.298916	0.297159	0.317776	0.314155
R-HSA-9759811	Regulation of CDH11 mRNA translation by microRNAs	0.194388	0.241965	0.204241	0.234063	0.216991	0.215345	0.249675	0.203676
R-HSA-9761174	Formation of intermediate mesoderm	0.0384234	0.120808	0.12143	0.173217	0.0404637	0.116526	0.177026	0.0235116
R-HSA-9762114	GSK3B and BTRC:CUL1-mediated-degradation of NFE2L2	0.195284	0.210238	0.204975	0.201785	0.203553	0.195738	0.204937	0.214726
R-HSA-9762292	Regulation of CDH11 function	0.0675446	0.165525	0.128145	0.165746	0.118389	0.15431	0.159069	0.116048
R-HSA-9762293	Regulation of CDH11 gene transcription	0.0501643	0.0800001	0.0421582	0.0868928	0.0467222	0.0858701	0.0937576	0.0626799
R-HSA-9764260	Regulation of Expression and Function of Type II Classical Cadherins	0.0804039	0.139276	0.104773	0.138336	0.104944	0.133678	0.140668	0.108373
R-HSA-9764302	Regulation of CDH19 Expression and Function	0.069611	0.173003	0.136631	0.165584	0.124888	0.161518	0.163772	0.113102
R-HSA-9768759	Regulation of NPAS4 gene expression	0.16573	0.227704	0.183162	0.207675	0.195594	0.206771	0.233205	0.201175
R-HSA-9768777	Regulation of NPAS4 gene transcription	0.0770684	0.176287	0.128433	0.1768	0.117225	0.188953	0.211655	0.167704
R-HSA-9768778	Regulation of NPAS4 mRNA translation	0.192108	0.238792	0.20524	0.219822	0.218189	0.205114	0.237008	0.204958
R-HSA-9768919	NPAS4 regulates expression of target genes	0.122627	0.149842	0.135804	0.133385	0.139442	0.136228	0.135821	0.152271
R-HSA-977068	Termination of O-glycan biosynthesis	-0.014929	-0.0479113	0.0989568	-0.0106335	-0.0226112	0.0582119	-0.0567842	-0.0192947
R-HSA-9772755	Formation of WDR5-containing histone-modifying complexes	0.0967232	0.108048	0.0893419	0.0964228	0.0920272	0.0980799	0.109825	0.118914
R-HSA-977347	Serine biosynthesis	0.0714017	-0.00270136	0.144844	0.0207913	0.0543238	0.0882024	0.0254976	0.0270962
R-HSA-977443	GABA receptor activation	0.0391317	0.0806672	0.0704803	0.0932522	0.07367	0.0911508	0.0976228	0.0554976
R-HSA-977444	GABA B receptor activation	0.0557453	0.0966979	0.0787345	0.103549	0.0938627	0.103383	0.106028	0.0685417
R-HSA-977606	Regulation of Complement cascade	0.0975267	0.0888874	0.0990193	0.136198	0.127013	0.127429	0.0870995	0.0625658
R-HSA-9793242	SUMOylation of nuclear envelope proteins	0.13374	0.150134	0.146612	0.141592	0.145272	0.156532	0.1579	0.18189
R-HSA-9793380	Formation of paraxial mesoderm	0.14703	0.189422	0.174797	0.18009	0.1669	0.169217	0.18195	0.172892
R-HSA-9793528	Ciprofloxacin ADME	0.0872637	0.142579	0.0460058	0.157667	0.127101	0.127863	0.142487	0.0695094
R-HSA-9796292	Formation of axial mesoderm	0.0691236	0.154978	0.129373	0.142929	0.10466	0.143323	0.146839	0.101976
R-HSA-9816359	Maternal to zygotic transition (MZT)	0.177046	0.197676	0.196098	0.190324	0.186057	0.192601	0.201943	0.202747
R-HSA-9818025	NFE2L2 regulating TCA cycle genes	0.225022	0.262116	0.241023	0.236262	0.266731	0.259491	0.220662	0.257096
R-HSA-9818026	NFE2L2 regulating inflammation associated genes	0.201309	0.217801	0.193176	0.20048	0.218947	0.23905	0.192807	0.226301
R-HSA-9818027	NFE2L2 regulating anti-oxidant/detoxification enzymes	0.169576	0.186027	0.171893	0.177418	0.185897	0.202769	0.173776	0.18398
R-HSA-9818028	NFE2L2 regulates pentose phosphate pathway genes	0.193194	0.206412	0.191339	0.188512	0.212795	0.227473	0.182948	0.216838
R-HSA-9818030	NFE2L2 regulating tumorigenic genes	0.21059	0.225008	0.207194	0.215819	0.224731	0.249467	0.207923	0.237326
R-HSA-9818032	NFE2L2 regulating MDR associated enzymes	0.191395	0.215516	0.186184	0.193288	0.21129	0.226934	0.188624	0.214169
R-HSA-9818035	NFE2L2 regulating ER-stress associated genes	0.187649	0.203231	0.178687	0.190669	0.204793	0.217873	0.182776	0.206387
R-HSA-9818749	Regulation of NFE2L2 gene expression	0.224531	0.242986	0.238724	0.222138	0.239225	0.239518	0.225911	0.257865
R-HSA-9819196	Zygotic genome activation (ZGA)	0.152426	0.1694	0.176863	0.16657	0.166511	0.182793	0.17447	0.172629
R-HSA-9820841	M-decay: degradation of maternal mRNAs by maternally stored factors	0.235881	0.274303	0.247883	0.262604	0.252343	0.254306	0.274389	0.26469
R-HSA-9820865	Z-decay: degradation of maternal mRNAs by zygotically expressed factors	0.247876	0.288265	0.247122	0.274425	0.24681	0.254328	0.288977	0.268476
R-HSA-9821002	Chromatin modifications during the maternal to zygotic transition (MZT)	0.159222	0.161679	0.17686	0.158032	0.150537	0.133537	0.174941	0.187701
R-HSA-9821993	Replacement of protamines by nucleosomes in the male pronucleus	0.163587	0.161159	0.190815	0.155307	0.147394	0.132743	0.170352	0.195639
R-HSA-9823730	Formation of definitive endoderm	0.0940491	0.186306	0.146463	0.160968	0.146523	0.17717	0.158174	0.144305
R-HSA-9823739	Formation of the anterior neural plate	0.103207	0.117545	0.1145	0.119777	0.113202	0.0996107	0.132399	0.126846
R-HSA-9824272	Somitogenesis	0.154438	0.198526	0.192809	0.193038	0.180607	0.181453	0.193212	0.180342
R-HSA-9824585	Regulation of MITF-M-dependent genes involved in pigmentation	0.13475	0.199322	0.17527	0.198257	0.157515	0.170577	0.201576	0.167055
R-HSA-9824594	Regulation of MITF-M-dependent genes involved in apoptosis	0.181607	0.214447	0.188069	0.208644	0.197603	0.191292	0.214839	0.222422
R-HSA-9824878	Regulation of TBK1, IKK蔚 (IKBKE)-mediated activation of IRF3, IRF7	0.147934	0.164492	0.145872	0.153892	0.157796	0.160517	0.153434	0.159145
R-HSA-9825892	Regulation of MITF-M-dependent genes involved in cell cycle and proliferation	0.0695776	0.137197	0.130428	0.111154	0.113939	0.122191	0.1216	0.119899
R-HSA-9825895	Regulation of MITF-M-dependent genes involved in DNA damage repair and senescence	0.171427	0.196255	0.205556	0.1881	0.192233	0.144651	0.195669	0.190274
R-HSA-982772	Growth hormone receptor signaling	0.126555	0.17124	0.146538	0.153117	0.184897	0.192045	0.150954	0.160626
R-HSA-9827857	Specification of primordial germ cells	0.117639	0.185588	0.180935	0.196537	0.175793	0.182368	0.192736	0.164994
R-HSA-9828211	Regulation of TBK1, IKK蔚-mediated activation of IRF3, IRF7 upon TLR3 ligation	0.151813	0.167613	0.151356	0.160934	0.15971	0.15749	0.16162	0.166695
R-HSA-9830364	Formation of the nephric duct	0.0757326	0.163272	0.1251	0.168509	0.100987	0.142706	0.161024	0.103544
R-HSA-9830369	Kidney development	0.0629786	0.151554	0.125944	0.160903	0.0914685	0.135704	0.15042	0.087933
R-HSA-9830674	Formation of the ureteric bud	0.0187727	0.139091	0.133467	0.166128	0.0615226	0.117133	0.151297	0.0567424
R-HSA-983170	Antigen Presentation: Folding, assembly and peptide loading of class I MHC	0.18076	0.170796	0.184079	0.186282	0.198597	0.194518	0.17604	0.181086
R-HSA-983189	Kinesins	0.0893793	0.0932181	0.11941	0.0923424	0.0780185	0.0785987	0.0928418	0.106047
R-HSA-9831926	Nephron development	0.0310233	0.0564528	0.0585209	0.0667205	0.0340075	0.0556421	0.0795817	0.0355744
R-HSA-9832991	Formation of the posterior neural plate	0.115536	0.155856	0.139105	0.158505	0.10002	0.104681	0.166605	0.125856
R-HSA-9833576	CDH11 homotypic and heterotypic interactions	0.0691607	0.187355	0.138025	0.173445	0.128858	0.173446	0.168082	0.117848
R-HSA-9834899	Specification of the neural plate border	0.0794122	0.154505	0.124248	0.155223	0.102057	0.123622	0.155855	0.105145
R-HSA-9836573	Mitochondrial RNA degradation	0.127363	0.143684	0.176326	0.120177	0.116789	0.109659	0.127325	0.134279
R-HSA-983695	Antigen activates B Cell Receptor (BCR) leading to generation of second messengers	0.11426	0.125269	0.0905395	0.114023	0.158213	0.166433	0.0953183	0.138846
R-HSA-983705	Signaling by the B Cell Receptor (BCR)	0.168897	0.173122	0.162009	0.161174	0.190879	0.186306	0.158589	0.192979
R-HSA-9837092	FASTK family proteins regulate processing and stability of mitochondrial RNAs	0.0556355	0.0652715	0.0850564	0.0378633	0.0376111	0.0628346	0.042	0.0642263
R-HSA-983712	Ion channel transport	0.130806	0.142255	0.14045	0.143533	0.165166	0.153733	0.141286	0.145399
R-HSA-9837999	Mitochondrial protein degradation	0.174076	0.155774	0.189055	0.165411	0.16988	0.143516	0.186798	0.176243
R-HSA-9840309	Glycosphingolipid biosynthesis	-0.0553184	-0.00242145	0.000360146	-0.00744241	0.000333536	0.0402037	-0.0170599	-0.0099257
R-HSA-9840310	Glycosphingolipid catabolism	0.136378	0.126463	0.0982621	0.144535	0.166871	0.146147	0.112395	0.109196
R-HSA-9840373	Cellular response to mitochondrial stress	0.261231	0.260424	0.253093	0.275434	0.279289	0.274761	0.282536	0.265759
R-HSA-9842663	Signaling by LTK	0.103075	0.146282	0.106532	0.119262	0.143041	0.162371	0.128384	0.13734
R-HSA-9843743	Transcriptional regulation of brown and beige adipocyte differentiation	0.156329	0.204423	0.177633	0.196239	0.173147	0.183679	0.201409	0.194345
R-HSA-9843745	Adipogenesis	0.144587	0.171024	0.162103	0.163825	0.16177	0.169509	0.161137	0.175085
R-HSA-9844594	Transcriptional regulation of brown and beige adipocyte differentiation by EBF2	0.156329	0.204423	0.177633	0.196239	0.173147	0.183679	0.201409	0.194345
R-HSA-9845576	Glycosphingolipid transport	0.0931383	0.119595	0.109456	0.0961516	0.108793	0.105546	0.111597	0.114105
R-HSA-9845614	Sphingolipid catabolism	0.0586701	0.0769144	0.127784	0.0940488	0.151271	0.133848	0.0514762	0.0751834
R-HSA-9851151	MDK and PTN in ALK signaling	0.0833349	0.120499	0.120864	0.170783	0.15148	0.160241	0.179705	0.112824
R-HSA-9853506	OGDH complex synthesizes succinyl-CoA from 2-OG	0.0897647	0.0864954	0.136658	0.0840808	0.130108	0.0860961	0.0798825	0.126796
R-HSA-9854311	Maturation of TCA enzymes and regulation of TCA cycle	0.174966	0.127365	0.145907	0.124049	0.139584	0.089325	0.146249	0.165354
R-HSA-9854907	Regulation of MITF-M dependent genes involved in metabolism	0.0900379	0.137232	0.109461	0.141307	0.12231	0.127828	0.160632	0.11365
R-HSA-9854909	Regulation of MITF-M dependent genes involved in invasion	-0.103079	0.0369889	0.00348707	0.0257933	0.145847	0.109527	0.0747385	0.0161639
R-HSA-9856649	Transcriptional and post-translational regulation of MITF-M expression and activity	0.0913282	0.161236	0.118539	0.145865	0.124331	0.134799	0.145889	0.126929
R-HSA-9856651	MITF-M-dependent gene expression	0.130304	0.164634	0.153012	0.15746	0.154684	0.156666	0.165831	0.164239
R-HSA-9856872	Malate-aspartate shuttle	0.0343711	0.0465391	0.124065	0.0827732	0.0912285	0.0516978	0.0818578	0.0806653
R-HSA-9857377	Regulation of MITF-M-dependent genes involved in lysosome biogenesis and autophagy	0.115711	0.0726575	0.0796893	0.115368	0.142073	0.14932	0.101096	0.105081
R-HSA-9857492	Protein lipoylation	0.0733446	0.060152	0.104169	0.0620994	0.085295	0.0422808	0.065874	0.0926998
R-HSA-9861559	PDH complex synthesizes acetyl-CoA from PYR	0.117312	0.132373	0.162674	0.107276	0.157257	0.0412828	0.167132	0.15908
R-HSA-9861718	Regulation of pyruvate metabolism	0.204812	0.226062	0.214844	0.214125	0.221686	0.213201	0.220473	0.215861
R-HSA-991365	Activation of GABAB receptors	0.0557453	0.0966979	0.0787345	0.103549	0.0938627	0.103383	0.106028	0.0685417
R-HSA-997272	Inhibition of voltage gated Ca2+ channels via Gbeta/gamma subunits	0.0758722	0.0997365	0.0922078	0.112298	0.105365	0.11445	0.102976	0.0777543
