# Supplementary material
Source: Research Square preprint supplement (doi:10.21203/rs.3.rs-8884166/v1)
Supplement: Supplementary file 2 [file 38510c7baae461bc0f44e1e7.xlsx]

## Sheet: Online Resource 5
	CD276	CD44	LAG3	PDCD1	PDCD1LG2	TIGIT	TNFRSF18	TNFRSF25	VTCN1
PLAU	0.254015	0.460694	0.0593472	-0.0227251	0.355756	0.0667724	0.00152581	0.0784736	-0.173842
CXCL8	0.302062	0.212265	-0.274088	-0.28491	-0.0272044	-0.206116	-0.152826	-0.146713	-0.00697151
ALKBH2	-0.0560279	-0.0600349	0.0801951	-0.0136211	-0.105871	0.020784	0.247854	0.04435	-0.0335136
TFPI2	0.273464	-0.0300323	0.112053	0.134063	0.172552	0.148532	-0.0252029	-0.216505	0.111949
