# Supplementary material
Source: Research Square preprint supplement (doi:10.21203/rs.3.rs-8884166/v1)
Supplement: Supplementary file 3 [file 3f62ae34f62054121d79f045.xlsx]

## Sheet: Online Resource 10
symbol	Immunecell	correlation	pvalue
PLAU	B.cells	-0.0449883	0.520809
PLAU	CD4..Tcm	-0.034517	0.622335
PLAU	CD8..naive.T.cells	-0.0907899	0.194345
PLAU	CD8..T.cells	-0.115284	0.0989283
PLAU	Epithelial.cells	0.359741	1.09E-07
PLAU	Melanocytes	-0.179626	0.00978109
PLAU	Memory.B.cells	-0.0705817	0.313391
PLAU	Neurons	-0.17232	0.013258
PLAU	Neutrophils	0.163743	0.0186853
PLAU	pro.B.cells	-0.211826	0.00223909
CXCL8	B.cells	-0.284336	3.44E-05
CXCL8	CD4..Tcm	-0.328422	1.44E-06
CXCL8	CD8..naive.T.cells	-0.287755	2.74E-05
CXCL8	CD8..T.cells	-0.347876	3.00E-07
CXCL8	Epithelial.cells	0.397462	3.31E-09
CXCL8	Melanocytes	-0.284372	3.44E-05
CXCL8	Memory.B.cells	-0.254987	0.000216615
CXCL8	Neurons	-0.282262	3.95E-05
CXCL8	Neutrophils	0.289327	2.47E-05
CXCL8	pro.B.cells	-0.337773	6.86E-07
ALKBH2	B.cells	0.0531163	0.448296
ALKBH2	CD4..Tcm	0.146235	0.0359595
ALKBH2	CD8..naive.T.cells	0.309684	5.91E-06
ALKBH2	CD8..T.cells	0.059015	0.399449
ALKBH2	Epithelial.cells	-0.119075	0.0882461
ALKBH2	Melanocytes	0.0986406	0.158366
ALKBH2	Memory.B.cells	0.138762	0.0466878
ALKBH2	Neurons	0.0866882	0.215356
ALKBH2	Neutrophils	-0.169509	0.0148608
ALKBH2	pro.B.cells	0.349495	2.62E-07
TFPI2	B.cells	-0.0481045	0.492319
TFPI2	CD4..Tcm	-0.138387	0.0472893
TFPI2	CD8..naive.T.cells	-0.0823833	0.239104
TFPI2	CD8..T.cells	0.0965487	0.167424
TFPI2	Epithelial.cells	0.0586705	0.402212
TFPI2	Melanocytes	-0.0275709	0.694036
TFPI2	Memory.B.cells	0.00139128	0.984165
TFPI2	Neurons	-0.0712751	0.308649
TFPI2	Neutrophils	-0.00747529	0.915075
TFPI2	pro.B.cells	-0.124848	0.0737756
