# Supplementary material
Source: Research Square preprint supplement (doi:10.21203/rs.3.rs-8884166/v1)
Supplement: Supplementary file 4 [file 6bd58ba29fac6cce58ea02a2.xlsx]

## Sheet: Online Resource 2
	category	subcategory	ID	Description	GeneRatio	BgRatio	pvalue	p.adjust	qvalue	geneID	Count
hsa04110	Cellular Processes	Cell growth and death	hsa04110	Cell cycle	63/413	158/8844	2.47E-43	7.44E-41	5.75E-41	MCM6/CDC7/MCM4/ESCO2/CDK1/CHEK1/CDC25A/TTK/DBF4/CDKN2A/CCNB1/CCNE2/RBL1/CCNB2/PCNA/CCNA2/CDC6/NDC80/CDCA5/CDC25C/CDK2/BUB1B/TRIP13/FBXO5/BUB3/ORC6/CDKN2C/MCM2/CDC45/ORC5/SMC1A/BUB1/PDS5B/PTTG1/MAD2L1/STAG1/RB1/E2F1/E2F2/HDAC2/CCNE1/MCM3/MCM5/CDC20/WEE1/AURKB/SMAD3/CCND1/ATR/RAD21/MCM7/PRKDC/TFDP1/ESPL1/CDC25B/E2F3/CDK4/CHEK2/ATM/MYC/CCND2/SMC3/CCNA1	63
hsa03030	Genetic Information Processing	Replication and repair	hsa03030	DNA replication	25/413	36/8844	9.94E-26	1.50E-23	1.16E-23	MCM6/MCM4/RFC3/POLE2/PRIM2/PRIM1/PCNA/FEN1/RPA3/POLA1/RNASEH2A/MCM2/RFC4/RPA1/MCM3/MCM5/RPA2/POLA2/LIG1/POLD3/MCM7/POLE/POLE4/POLD1/RFC2	25
hsa03460	Genetic Information Processing	Replication and repair	hsa03460	Fanconi anemia pathway	24/413	55/8844	3.93E-18	3.94E-16	3.05E-16	FANCI/BRIP1/RAD51/BLM/USP1/RPA3/FANCC/BRCA1/RAD51C/FANCD2/RPA1/FANCG/FANCE/UBE2T/FANCA/FANCL/BRCA2/RPA2/FANCB/ATR/TOP3A/FANCM/PALB2/MLH1	24
hsa04115	Cellular Processes	Cell growth and death	hsa04115	p53 signaling pathway	25/413	75/8844	1.61E-15	1.21E-13	9.36E-14	CDK1/CHEK1/CDKN2A/CCNB1/CCNE2/CCNB2/RRM2/CDK2/BID/CCNE1/BAX/CASP8/CCND1/ATR/APAF1/PIDD1/SIVA1/TP53I3/TP73/CDK4/CCNG2/CHEK2/ATM/CCND2/PMAIP1	25
hsa03440	Genetic Information Processing	Replication and repair	hsa03440	Homologous recombination	18/413	41/8844	5.82E-14	3.50E-12	2.71E-12	BRIP1/RAD51/BLM/RPA3/BRCA1/RAD51C/RAD54L/RPA1/BARD1/BRCA2/RPA2/POLD3/TOP3A/PALB2/ATM/POLD1/RAD52/BABAM1	18
hsa05166	Human Diseases	Infectious disease: viral	hsa05166	Human T-cell leukemia virus 1 infection	39/413	223/8844	4.67E-13	2.34E-11	1.81E-11	CHEK1/CDKN2A/CCNE2/CCNB2/CCNA2/CDK2/BUB1B/BUB3/CDKN2C/PTTG1/MAD2L1/RB1/E2F1/E2F2/CCNE1/CDC20/BAX/SMAD3/CCND1/RANBP1/EGR1/ETS2/ATR/CD3G/PPP3R1/ESPL1/SLC2A1/CD3D/E2F3/CDK4/RAN/CHEK2/ATM/IL15RA/MYC/CCND2/HLA-DPA1/CCNA1/PIK3R1	39
hsa04218	Cellular Processes	Cell growth and death	hsa04218	Cellular senescence	32/413	157/8844	8.84E-13	3.80E-11	2.94E-11	CDK1/CHEK1/CDC25A/CDKN2A/CCNB1/CCNE2/RBL1/CCNB2/CCNA2/MYBL2/CDK2/FOXM1/RB1/E2F1/E2F2/CCNE1/RRAS2/SMAD3/CCND1/ATR/IL1A/HIPK2/PPP3R1/CXCL8/E2F3/CDK4/CHEK2/ATM/MYC/CCND2/CCNA1/PIK3R1	32
hsa03430	Genetic Information Processing	Replication and repair	hsa03430	Mismatch repair	13/413	23/8844	3.12E-12	1.17E-10	9.07E-11	RFC3/EXO1/PCNA/RPA3/RFC4/RPA1/RPA2/LIG1/POLD3/MLH1/MSH2/POLD1/RFC2	13
hsa05169	Human Diseases	Infectious disease: viral	hsa05169	Epstein-Barr virus infection	35/413	203/8844	1.20E-11	4.01E-10	3.10E-10	CCNE2/CCNA2/CDK2/CR2/RB1/E2F1/EIF2AK2/PSMD14/BID/E2F2/HDAC2/CCNE1/BAX/BCL2L11/CASP8/CCND1/STAT1/APAF1/TLR2/CD3G/CD3D/SYK/SAP30/E2F3/CDK4/IRF7/CXCL10/TAP2/IFNAR1/MYC/CCND2/HLA-DPA1/TAP1/CCNA1/PIK3R1	35
hsa03420	Genetic Information Processing	Replication and repair	hsa03420	Nucleotide excision repair	17/413	63/8844	2.41E-09	7.24E-08	5.60E-08	RFC3/POLE2/PCNA/RPA3/RFC4/RPA1/RPA2/LIG1/POLD3/POLE/POLR2I/MNAT1/POLE4/POLR2D/POLD1/RFC2/XPC	17
hsa03410	Genetic Information Processing	Replication and repair	hsa03410	Base excision repair	14/413	44/8844	6.00E-09	1.64E-07	1.27E-07	RFC3/POLE2/PCNA/FEN1/PARP1/RFC4/MBD4/LIG1/POLD3/POLE/TDP1/POLE4/POLD1/RFC2	14
hsa05161	Human Diseases	Infectious disease: viral	hsa05161	Hepatitis B	27/413	163/8844	7.20E-09	1.81E-07	1.40E-07	CCNE2/PCNA/CCNA2/CDK2/BIRC5/RB1/E2F1/BID/E2F2/CCNE1/BAX/CASP8/SMAD3/STAT1/MMP9/APAF1/TLR4/TLR2/PRKCA/CXCL8/STAT4/E2F3/IRF7/IFNAR1/MYC/CCNA1/PIK3R1	27
hsa05219	Human Diseases	Cancer: specific types	hsa05219	Bladder cancer	12/413	41/8844	2.11E-07	4.75E-06	3.67E-06	CDKN2A/RB1/E2F1/E2F2/CCND1/MMP9/RPS6KA5/CXCL8/E2F3/CDK4/MYC/HBEGF	12
hsa05222	Human Diseases	Cancer: specific types	hsa05222	Small cell lung cancer	18/413	93/8844	2.21E-07	4.75E-06	3.67E-06	CKS2/CCNE2/CKS1B/CDK2/RB1/E2F1/E2F2/CCNE1/BAX/CCND1/APAF1/PTK2/E2F3/CDK4/MYC/LAMA1/BIRC3/PIK3R1	18
hsa05164	Human Diseases	Infectious disease: viral	hsa05164	Influenza A	25/413	172/8844	3.64E-07	7.30E-06	5.64E-06	KPNA2/RAE1/EIF2AK2/BID/BAX/EIF2S1/IFNGR1/CASP8/STAT1/TNFSF10/NUP98/APAF1/TLR4/IL1A/PRSS2/PRKCA/CXCL8/TPSB2/CDK4/IRF7/CXCL10/IFNAR1/IL18/HLA-DPA1/PIK3R1	25
hsa05162	Human Diseases	Infectious disease: viral	hsa05162	Measles	22/413	139/8844	4.17E-07	7.84E-06	6.06E-06	CCNE2/CDK2/EIF2AK2/BID/CCNE1/BAX/EIF2S1/CASP8/CCND1/STAT1/APAF1/TLR4/IL1A/TLR2/CD3G/CD3D/TP73/CDK4/IRF7/IFNAR1/CCND2/PIK3R1	22
hsa00240	Metabolism	Nucleotide metabolism	hsa00240	Pyrimidine metabolism	13/413	58/8844	1.92E-06	3.40E-05	2.63E-05	RRM2/TK1/RRM1/TYMS/DCTPP1/DUT/DCK/CTPS1/CMPK2/CDA/DTYMK/UMPS/DPYD	13
hsa05223	Human Diseases	Cancer: specific types	hsa05223	Non-small cell lung cancer	14/413	73/8844	5.56E-06	9.30E-05	7.19E-05	CDKN2A/RB1/E2F1/E2F2/STK4/BAX/CCND1/KIF5A/TGFA/PRKCA/E2F3/CDK4/MET/PIK3R1	14
hsa01524	Human Diseases	Drug resistance: antineoplastic	hsa01524	Platinum drug resistance	14/413	75/8844	7.75E-06	0.000122712	9.48E-05	CDKN2A/TOP2A/BRCA1/BIRC5/BID/BAX/CASP8/APAF1/MLH1/MSH2/ATM/PMAIP1/BIRC3/PIK3R1	14
hsa05212	Human Diseases	Cancer: specific types	hsa05212	Pancreatic cancer	14/413	77/8844	1.07E-05	0.000160345	0.000123924	CDKN2A/RAD51/RB1/E2F1/E2F2/BRCA2/BAX/SMAD3/CCND1/STAT1/TGFA/E2F3/CDK4/PIK3R1	14
hsa05203	Human Diseases	Cancer: overview	hsa05203	Viral carcinogenesis	24/413	205/8844	2.85E-05	0.000408723	0.000315886	CDK1/CHEK1/CDKN2A/CCNE2/RBL1/CCNA2/CDK2/RB1/EIF2AK2/HDAC2/CCNE1/CDC20/BAX/CASP8/CCND1/RANBP1/REL/SYK/CDK4/IRF7/CCND2/PMAIP1/CCNA1/PIK3R1	24
hsa01232	Metabolism	Global and overview maps	hsa01232	Nucleotide metabolism	14/413	85/8844	3.42E-05	0.000468533	0.000362111	RRM2/TK1/RRM1/TYMS/DCTPP1/HPRT1/DUT/DCK/DGUOK/CTPS1/CMPK2/CDA/DTYMK/PNP	14
hsa04620	Organismal Systems	Immune system	hsa04620	Toll-like receptor signaling pathway	16/413	109/8844	4.19E-05	0.000547867	0.000423426	CD86/CD14/CASP8/STAT1/TLR4/TLR2/SPP1/CXCL8/CXCL9/CCL4/IRF5/IRF7/CXCL10/IFNAR1/CXCL11/PIK3R1	16
hsa05210	Human Diseases	Cancer: specific types	hsa05210	Colorectal cancer	14/413	87/8844	4.48E-05	0.000561375	0.000433865	BIRC5/BAX/BCL2L11/EREG/SMAD3/CCND1/TGFA/MLH1/MSH2/LEF1/AXIN2/MYC/PMAIP1/PIK3R1	14
hsa01522	Human Diseases	Drug resistance: antineoplastic	hsa01522	Endocrine resistance	15/413	99/8844	4.98E-05	0.000599428	0.000463275	CDKN2A/CDKN2C/RB1/E2F1/E2F2/BAX/CCND1/MMP9/ESR1/PTK2/E2F3/CDK4/MED1/HBEGF/PIK3R1	15
hsa04061	Environmental Information Processing	Signaling molecules and interaction	hsa04061	Viral protein interaction with cytokine and cytokine receptor	15/413	100/8844	5.61E-05	0.000649695	0.000502125	TNFSF10/CXCR3/CXCL8/CXCR4/CXCL9/CCL4/CXCL12/CXCL1/CXCL10/IL18/CXCL14/CCL22/CCL18/CXCL11/CXCR2	15
hsa04215	Cellular Processes	Cell growth and death	hsa04215	Apoptosis - multiple species	8/413	32/8844	8.26E-05	0.000920646	0.000711533	BIRC5/BID/BAX/BCL2L11/CASP8/APAF1/PMAIP1/BIRC3	8
hsa05167	Human Diseases	Infectious disease: viral	hsa05167	Kaposi sarcoma-associated herpesvirus infection	22/413	196/8844	0.000115354	0.00124006	0.000958395	RB1/E2F1/EIF2AK2/BID/E2F2/BAX/CD86/IFNGR1/CASP8/CCND1/STAT1/PPP3R1/CXCL8/SYK/CXCL1/LEF1/E2F3/CDK4/IRF7/IFNAR1/MYC/PIK3R1	22
hsa04068	Environmental Information Processing	Signal transduction	hsa04068	FoxO signaling pathway	17/413	133/8844	0.000143564	0.00143037	0.00110548	CCNB1/CCNB2/PLK4/CDK2/STK4/BCL2L11/SMAD3/CCND1/TNFSF10/BNIP3/PRMT1/CCNG2/HOMER1/ATM/CCND2/IL7R/PIK3R1	17
hsa05170	Human Diseases	Infectious disease: viral	hsa05170	Human immunodeficiency virus 1 infection	23/413	213/8844	0.000146209	0.00143037	0.00110548	CDK1/CHEK1/CCNB1/CCNB2/CDC25C/BID/BAX/WEE1/CASP8/ATR/TLR4/TLR2/CD3G/PTK2/PPP3R1/PRKCA/CXCR4/CD3D/TAP2/ATM/TAP1/BST2/PIK3R1	23
hsa05160	Human Diseases	Infectious disease: viral	hsa05160	Hepatitis C	19/413	159/8844	0.000147314	0.00143037	0.00110548	CDK2/RB1/E2F1/EIF2AK2/BID/E2F2/BAX/EIF2S1/CASP8/CCND1/STAT1/APAF1/E2F3/CDK4/IRF7/CXCL10/IFNAR1/MYC/PIK3R1	19
hsa04210	Cellular Processes	Cell growth and death	hsa04210	Apoptosis	17/413	136/8844	0.000189026	0.00177802	0.00137417	PARP1/BIRC5/CASP2/LMNB1/BID/BAX/EIF2S1/BCL2L11/CASP8/TNFSF10/APAF1/PIDD1/ATM/GZMB/PMAIP1/BIRC3/PIK3R1	17
hsa05220	Human Diseases	Cancer: specific types	hsa05220	Chronic myeloid leukemia	12/413	77/8844	0.000213309	0.00194563	0.00150371	CDKN2A/RB1/E2F1/E2F2/HDAC2/BAX/SMAD3/CCND1/E2F3/CDK4/MYC/PIK3R1	12
hsa04114	Cellular Processes	Cell growth and death	hsa04114	Oocyte meiosis	17/413	139/8844	0.000246574	0.0021829	0.00168708	CDK1/AURKA/CCNB1/CCNE2/CCNB2/CDC25C/CDK2/FBXO5/SMC1A/BUB1/PTTG1/MAD2L1/CCNE1/CDC20/PPP3R1/ESPL1/SMC3	17
hsa05206	Human Diseases	Cancer: overview	hsa05206	MicroRNAs in cancer	29/413	312/8844	0.000297695	0.00256018	0.00197867	CDC25A/CDKN2A/KIF23/CCNE2/STMN1/EZH2/CDCA5/CDC25C/BRCA1/E2F1/DNMT1/E2F2/HDAC2/CCNE1/BCL2L11/CCND1/MMP9/RPS6KA5/PRKCA/BMF/CDC25B/E2F3/ATM/DNMT3A/MYC/CCND2/MET/PLAU/PIK3R1	29
hsa05215	Human Diseases	Cancer: specific types	hsa05215	Prostate cancer	13/413	98/8844	0.000598179	0.00500144	0.00386543	CCNE2/CDK2/RB1/E2F1/E2F2/CCNE1/CCND1/MMP9/TGFA/LEF1/E2F3/PLAU/PIK3R1	13
hsa04914	Organismal Systems	Endocrine system	hsa04914	Progesterone-mediated oocyte maturation	14/413	111/8844	0.000626543	0.00509702	0.00393929	CDK1/CDC25A/AURKA/CCNB1/CCNB2/CCNA2/CDC25C/CDK2/BUB1/MAD2L1/KIF22/CDC25B/CCNA1/PIK3R1	14
hsa05202	Human Diseases	Cancer: overview	hsa05202	Transcriptional misregulation in cancer	20/413	193/8844	0.000667999	0.00529126	0.00408941	CCNA2/CDKN2C/HDAC2/BAX/CD86/CD14/MMP9/REL/PTK2/CXCL8/ETV1/ATM/GZMB/MYC/CCND2/MET/PLAU/ID2/BIRC3/CCNA1	20
hsa05214	Human Diseases	Cancer: specific types	hsa05214	Glioma	11/413	76/8844	0.000743516	0.00573842	0.00443501	CDKN2A/RB1/E2F1/E2F2/BAX/CCND1/TGFA/PRKCA/E2F3/CDK4/PIK3R1	11
hsa05321	Human Diseases	Immune disease	hsa05321	Inflammatory bowel disease	10/413	65/8844	0.000789112	0.00593807	0.00458931	IFNGR1/SMAD3/STAT1/TLR4/IL1A/TLR2/STAT4/IL18/IL12RB2/HLA-DPA1	10
hsa05163	Human Diseases	Infectious disease: viral	hsa05163	Human cytomegalovirus infection	22/413	226/8844	0.000857735	0.00629703	0.00486674	CDKN2A/RB1/E2F1/BID/E2F2/BAX/CASP8/CCND1/PTK2/PPP3R1/PRKCA/CXCL8/CXCR4/CCL4/CXCL12/E2F3/CDK4/TAP2/MYC/TAP1/CXCR2/PIK3R1	22
hsa05134	Human Diseases	Infectious disease: bacterial	hsa05134	Legionellosis	9/413	56/8844	0.00103905	0.00744651	0.00575513	CD14/CASP8/APAF1/TLR4/TLR2/BNIP3/CXCL8/CXCL1/IL18	9
hsa04064	Environmental Information Processing	Signal transduction	hsa04064	NF-kappa B signaling pathway	13/413	105/8844	0.00115625	0.00809373	0.00625534	PARP1/CD14/TLR4/CXCL8/PIDD1/CCL4/SYK/CXCL12/CXCL1/ATM/TNFSF11/PLAU/BIRC3	13
hsa05224	Human Diseases	Cancer: specific types	hsa05224	Breast cancer	16/413	148/8844	0.00144725	0.00990052	0.00765174	BRCA1/RB1/E2F1/E2F2/BRCA2/BAX/CCND1/ESR1/LEF1/E2F3/CDK4/TNFSF11/AXIN2/MYC/HEY2/PIK3R1	16
hsa04060	Environmental Information Processing	Signaling molecules and interaction	hsa04060	Cytokine-cytokine receptor interaction	26/413	298/8844	0.00154099	0.0103075	0.0079663	IFNGR1/TNFSF10/CXCR3/TSLP/IL1A/CXCL8/CXCR4/CSF3/CXCL9/CCL4/CXCL12/CXCL1/CXCL10/IFNAR1/IL18/CXCL14/IL15RA/CCL22/CCL18/TNFSF11/CXCL11/OSMR/IL12RB2/IL7R/CXCR2/CD27	26
hsa05226	Human Diseases	Cancer: specific types	hsa05226	Gastric cancer	16/413	150/8844	0.00166676	0.0109064	0.00842914	CCNE2/CDK2/RB1/E2F1/E2F2/CCNE1/BAX/SMAD3/CCND1/MLH1/LEF1/E2F3/AXIN2/MYC/MET/PIK3R1	16
hsa05165	Human Diseases	Infectious disease: viral	hsa05165	Human papillomavirus infection	28/413	333/8844	0.00179323	0.0114843	0.00887576	CCNE2/RBL1/CCNA2/CDK2/RB1/E2F1/EIF2AK2/HDAC2/CCNE1/BAX/CASP8/CCND1/STAT1/PRKCI/ATR/SPP1/PTK2/CDK4/IFNAR1/TUBG1/ATM/AXIN2/VWF/CCND2/HEY2/LAMA1/CCNA1/PIK3R1	28
hsa05218	Human Diseases	Cancer: specific types	hsa05218	Melanoma	10/413	73/8844	0.00196497	0.012322	0.00952322	CDKN2A/RB1/E2F1/E2F2/BAX/CCND1/E2F3/CDK4/MET/PIK3R1	10
hsa05144	Human Diseases	Infectious disease: parasitic	hsa05144	Malaria	8/413	50/8844	0.00201845	0.0123991	0.00958278	TLR4/TLR2/CXCL8/CSF3/SELP/IL18/HBB/MET	8
hsa03450	Genetic Information Processing	Replication and repair	hsa03450	Non-homologous end-joining	4/413	13/8844	0.00239324	0.0144073	0.0111349	FEN1/XRCC4/PRKDC/XRCC6	4
hsa05323	Human Diseases	Immune disease	hsa05323	Rheumatoid arthritis	11/413	94/8844	0.00423061	0.0249689	0.0192975	CD86/TLR4/IL1A/TLR2/CXCL8/CXCL12/CXCL1/CTLA4/IL18/TNFSF11/HLA-DPA1	11
hsa04814	Cellular Processes	Cell motility	hsa04814	Motor proteins	18/413	197/8844	0.00487514	0.0282196	0.0218098	KIF23/KIF11/KIF15/KIF2C/KIF4A/KIF20B/KIF14/KIF20A/CENPE/KIFC1/KIF18B/KIF5A/KIF22/KIF2A/MYH11/TUBB/TUBG1/TPM4	18
hsa04623	Organismal Systems	Immune system	hsa04623	Cytosolic DNA-sensing pathway	10/413	83/8844	0.00508794	0.0288956	0.0223324	IFI16/G3BP1/POLR3C/CASP8/POLR1D/CCL4/POLR3K/IRF7/CXCL10/IL18	10
hsa04934	Human Diseases	Endocrine and metabolic disease	hsa04934	Cushing syndrome	15/413	155/8844	0.00580975	0.030868	0.0238567	CDKN2A/CCNE2/CDK2/CDKN2C/RB1/E2F1/E2F2/CCNE1/CCND1/FH/LEF1/E2F3/CDK4/AHR/AXIN2	15
hsa04151	Environmental Information Processing	Signal transduction	hsa04151	PI3K-Akt signaling pathway	28/413	362/8844	0.00583481	0.030868	0.0238567	CCNE2/CDK2/BRCA1/CCNE1/BCL2L11/EREG/CCND1/GYS2/TGFA/TLR4/MYB/TLR2/SPP1/PTK2/PRKCA/CSF3/SYK/CDK4/IFNAR1/VWF/MYC/CCND2/MET/OSMR/IL7R/LAMA1/FLT3LG/PIK3R1	28
hsa05225	Human Diseases	Cancer: specific types	hsa05225	Hepatocellular carcinoma	16/413	170/8844	0.00583846	0.030868	0.0238567	CDKN2A/RB1/E2F1/E2F2/BAX/SMAD3/CCND1/TGFA/PRKCA/LEF1/E2F3/CDK4/AXIN2/MYC/MET/PIK3R1	16
hsa05417	Human Diseases	Cardiovascular disease	hsa05417	Lipid and atherosclerosis	19/413	216/8844	0.00584544	0.030868	0.0238567	BID/BAX/EIF2S1/CD14/CASP8/TNFSF10/MMP9/APAF1/TLR4/TLR2/PTK2/PPP3R1/PRKCA/CXCL8/SELP/CXCL1/IRF7/IL18/PIK3R1	19
hsa04640	Organismal Systems	Immune system	hsa04640	Hematopoietic cell lineage	11/413	99/8844	0.00627607	0.0325707	0.0251726	CR2/CD14/IL1A/CD3G/CSF3/CD3D/IL7R/ANPEP/HLA-DPA1/FLT3LG/CD38	11
hsa04933	Human Diseases	Endocrine and metabolic disease	hsa04933	AGE-RAGE signaling pathway in diabetic complications	11/413	101/8844	0.00728409	0.0371612	0.0287205	BAX/SMAD3/CCND1/F3/STAT1/EGR1/IL1A/PRKCA/CXCL8/CDK4/PIK3R1	11
hsa05340	Human Diseases	Immune disease	hsa05340	Primary immunodeficiency	6/413	38/8844	0.00775144	0.0388864	0.0300538	CD3D/ICOS/TAP2/IL7R/PTPRC/TAP1	6
hsa04062	Organismal Systems	Immune system	hsa04062	Chemokine signaling pathway	17/413	193/8844	0.00875562	0.043204	0.0333907	STAT1/CXCR3/PTK2/CXCL8/CXCR4/ITK/CXCL9/CCL4/CXCL12/CXCL1/CXCL10/CXCL14/CCL22/CCL18/CXCL11/CXCR2/PIK3R1	17
hsa05235	Human Diseases	Cancer: overview	hsa05235	PD-L1 expression and PD-1 checkpoint pathway in cancer	10/413	90/8844	0.0089708	0.0435518	0.0336596	IFNGR1/STAT1/TLR4/TLR2/CD3G/PPP3R1/CD274/RASGRP1/CD3D/PIK3R1	10
hsa05152	Human Diseases	Infectious disease: bacterial	hsa05152	Tuberculosis	16/413	180/8844	0.00994804	0.0475295	0.0367338	BID/BAX/CD14/IFNGR1/CASP8/STAT1/RIPK2/APAF1/TLR4/IL1A/TLR2/FCER1G/PPP3R1/SYK/IL18/HLA-DPA1	16
hsa03013	Genetic Information Processing	Translation	hsa03013	Nucleocytoplasmic transport	11/413	108/8844	0.0118358	0.0556653	0.0430216	NUP205/NUP107/CSE1L/KPNA2/NUP50/RAE1/NUP37/NUP98/NUP153/UPF3B/RAN	11
hsa00983	Metabolism	Xenobiotics biodegradation and metabolism	hsa00983	Drug metabolism - other enzymes	9/413	81/8844	0.0128609	0.059556	0.0460286	RRM2/TK1/RRM1/HPRT1/DUT/GUSB/CDA/UMPS/DPYD	9
hsa04217	Cellular Processes	Cell growth and death	hsa04217	Necroptosis	14/413	159/8844	0.0165435	0.0754484	0.0583112	PARP1/EIF2AK2/BID/BAX/IFNGR1/CASP8/STAT1/TNFSF10/TLR4/PYGB/IL1A/STAT4/IFNAR1/BIRC3	14
hsa04012	Environmental Information Processing	Signal transduction	hsa04012	ErbB signaling pathway	9/413	86/8844	0.0185085	0.08315	0.0642635	EREG/NRG1/TGFA/PTK2/PRKCA/ABL2/MYC/HBEGF/PIK3R1	9
hsa05213	Human Diseases	Cancer: specific types	hsa05213	Endometrial cancer	7/413	59/8844	0.0193261	0.0855465	0.0661157	BAX/CCND1/MLH1/LEF1/AXIN2/MYC/PIK3R1	7
hsa03020	Genetic Information Processing	Transcription	hsa03020	RNA polymerase	5/413	34/8844	0.0197189	0.08602	0.0664817	POLR3C/POLR1D/POLR2I/POLR3K/POLR2D	5
hsa04610	Organismal Systems	Immune system	hsa04610	Complement and coagulation cascades	9/413	88/8844	0.0212082	0.0911954	0.0704815	CR2/C3AR1/F3/C1QB/PLAUR/CFD/VWF/CLU/PLAU	9
hsa04630	Environmental Information Processing	Signal transduction	hsa04630	JAK-STAT signaling pathway	14/413	168/8844	0.0253644	0.106986	0.0826854	IFNGR1/CCND1/STAT1/TSLP/STAT4/CSF3/IFNAR1/IL15RA/MYC/CCND2/OSMR/IL12RB2/IL7R/PIK3R1	14
hsa04672	Organismal Systems	Immune system	hsa04672	Intestinal immune network for IgA production	6/413	49/8844	0.0255913	0.106986	0.0826854	CD86/CXCR4/CXCL12/ICOS/IL15RA/HLA-DPA1	6
hsa04660	Organismal Systems	Immune system	hsa04660	T cell receptor signaling pathway	11/413	122/8844	0.0270614	0.111582	0.0862374	CD3G/PPP3R1/RASGRP1/ITK/CD3D/CDK4/ICOS/CTLA4/LCP2/PTPRC/PIK3R1	11
hsa05205	Human Diseases	Cancer: overview	hsa05205	Proteoglycans in cancer	16/413	204/8844	0.0291308	0.118491	0.0915776	RRAS2/CCND1/TWIST2/MMP9/TLR4/ESR1/PLAUR/TLR2/PTK2/PRKCA/GPC3/MYC/HBEGF/MET/PLAU/PIK3R1	16
hsa04390	Environmental Information Processing	Signal transduction	hsa04390	Hippo signaling pathway	13/413	157/8844	0.0319114	0.126386	0.097679	BIRC5/STK3/SMAD3/CCND1/PRKCI/SOX2/TP73/LEF1/AXIN2/MYC/CCND2/ID2/BIRC3	13
hsa04932	Human Diseases	Endocrine and metabolic disease	hsa04932	Non-alcoholic fatty liver disease	13/413	157/8844	0.0319114	0.126386	0.097679	BID/COX7B/BAX/EIF2S1/BCL2L11/CASP8/UQCR10/NDUFA6/IL1A/CXCL8/NDUFA7/SDHB/PIK3R1	13
hsa00270	Metabolism	Amino acid metabolism	hsa00270	Cysteine and methionine metabolism	6/413	52/8844	0.0331828	0.129715	0.100252	LDHC/DNMT1/GCLC/GOT2/DNMT3A/GCLM	6
hsa05221	Human Diseases	Cancer: specific types	hsa05221	Acute myeloid leukemia	7/413	68/8844	0.0385477	0.148755	0.114967	CCNA2/CD14/CCND1/LEF1/MYC/CCNA1/PIK3R1	7
hsa05014	Human Diseases	Neurodegenerative disease	hsa05014	Amyotrophic lateral sclerosis	25/413	371/8844	0.0409861	0.155216	0.119961	NUP205/NUP107/NUP50/RAE1/PSMD14/BID/COX7B/NEFH/BAX/EIF2S1/NUP37/NUP98/NRG1/UQCR10/NDUFA6/KIF5A/APAF1/NUP153/PPP3R1/TUBB/ANG/NDUFA7/SDHB/GPX3/SLC1A2	25
hsa05416	Human Diseases	Cardiovascular disease	hsa05416	Viral myocarditis	7/413	69/8844	0.0412534	0.155216	0.119961	BID/CD86/CASP8/CCND1/ABL2/HLA-DPA1/LAMA1	7
hsa04650	Organismal Systems	Immune system	hsa04650	Natural killer cell mediated cytotoxicity	11/413	135/8844	0.0507445	0.184798	0.142824	BID/IFNGR1/TNFSF10/FCER1G/PPP3R1/PRKCA/SYK/IFNAR1/GZMB/LCP2/PIK3R1	11
hsa05142	Human Diseases	Infectious disease: parasitic	hsa05142	Chagas disease	9/413	103/8844	0.0509576	0.184798	0.142824	IFNGR1/CASP8/C1QB/TLR4/TLR2/CD3G/CXCL8/CD3D/PIK3R1	9
hsa05146	Human Diseases	Infectious disease: parasitic	hsa05146	Amoebiasis	9/413	103/8844	0.0509576	0.184798	0.142824	CD14/TLR4/TLR2/PTK2/PRKCA/CXCL8/CXCL1/LAMA1/PIK3R1	9
hsa00480	Metabolism	Metabolism of other amino acids	hsa00480	Glutathione metabolism	6/413	58/8844	0.0523965	0.187754	0.145108	RRM2/RRM1/GCLC/GPX3/ANPEP/GCLM	6
hsa05171	Human Diseases	Infectious disease: viral	hsa05171	Coronavirus disease - COVID-19	17/413	238/8844	0.0532803	0.188675	0.14582	EIF2AK2/C3AR1/STAT1/C1QB/TLR4/TLR2/CFD/PRKCA/CXCL8/CSF3/SYK/SELP/CXCL10/IFNAR1/VWF/HBEGF/PIK3R1	17
hsa00100	Metabolism	Lipid metabolism	hsa00100	Steroid biosynthesis	3/413	20/8844	0.0639096	0.221112	0.170889	LBR/EBP/SQLE	3
hsa00670	Metabolism	Metabolism of cofactors and vitamins	hsa00670	One carbon pool by folate	3/413	20/8844	0.0639096	0.221112	0.170889	DHFR/MTHFD2/TYMS	3
hsa04658	Organismal Systems	Immune system	hsa04658	Th1 and Th2 cell differentiation	8/413	92/8844	0.0650305	0.222434	0.171911	IFNGR1/STAT1/CD3G/PPP3R1/STAT4/CD3D/IL12RB2/HLA-DPA1	8
hsa01521	Human Diseases	Drug resistance: antineoplastic	hsa01521	EGFR tyrosine kinase inhibitor resistance	7/413	80/8844	0.0791901	0.267823	0.20699	BAX/BCL2L11/NRG1/TGFA/PRKCA/MET/PIK3R1	7
hsa03083	Genetic Information Processing	Chromosome	hsa03083	Polycomb repressive complex	7/413	83/8844	0.092185	0.305198	0.235876	EZH2/HDAC2/RBBP7/AURKB/MTF2/TFDP1/EED	7
hsa05216	Human Diseases	Cancer: specific types	hsa05216	Thyroid cancer	4/413	37/8844	0.0922692	0.305198	0.235876	BAX/CCND1/LEF1/MYC	4
hsa05211	Human Diseases	Cancer: specific types	hsa05211	Renal cell carcinoma	6/413	70/8844	0.107636	0.352156	0.272168	EPAS1/TGFA/FH/SLC2A1/MET/PIK3R1	6
hsa04917	Organismal Systems	Endocrine system	hsa04917	Prolactin signaling pathway	6/413	71/8844	0.11323	0.362578	0.280223	CCND1/STAT1/ESR1/TNFSF11/CCND2/PIK3R1	6
hsa05230	Human Diseases	Cancer: overview	hsa05230	Central carbon metabolism in cancer	6/413	71/8844	0.11323	0.362578	0.280223	LDHC/SLC2A1/SLC7A5/MYC/MET/PIK3R1	6
hsa04919	Organismal Systems	Endocrine system	hsa04919	Thyroid hormone signaling pathway	9/413	122/8844	0.116505	0.367233	0.283821	HDAC2/CCND1/STAT1/ESR1/PRKCA/SLC2A1/MED1/MYC/PIK3R1	9
hsa04625	Organismal Systems	Immune system	hsa04625	C-type lectin receptor signaling pathway	8/413	105/8844	0.117124	0.367233	0.283821	RRAS2/CASP8/STAT1/FCER1G/PPP3R1/SYK/CCL22/PIK3R1	8
hsa05132	Human Diseases	Infectious disease: bacterial	hsa05132	Salmonella infection	16/413	251/8844	0.127614	0.395998	0.306052	CSE1L/BAX/CD14/CASP8/TNFSF10/RIPK2/KIF5A/TLR4/TLR2/CXCL8/TUBB/LEF1/IL18/MYC/PTPRC/BIRC3	16
hsa00790	Metabolism	Metabolism of cofactors and vitamins	hsa00790	Folate biosynthesis	3/413	27/8844	0.129613	0.39618	0.306192	DHFR/GCH1/AKR1B1	3
hsa04350	Environmental Information Processing	Signal transduction	hsa04350	TGF-beta signaling pathway	8/413	108/8844	0.131621	0.39618	0.306192	RBL1/HDAC2/SMAD3/TFDP1/MYC/ID4/ID3/ID2	8
hsa04659	Organismal Systems	Immune system	hsa04659	Th17 cell differentiation	8/413	108/8844	0.131621	0.39618	0.306192	IFNGR1/SMAD3/STAT1/CD3G/PPP3R1/CD3D/AHR/HLA-DPA1	8
hsa04936	Human Diseases	Endocrine and metabolic disease	hsa04936	Alcoholic liver disease	10/413	144/8844	0.135827	0.399927	0.309088	TRA2B/C3AR1/CD14/CASP8/CCND1/C1QB/TLR4/CXCL8/CXCL1/LEF1	10
hsa04066	Environmental Information Processing	Signal transduction	hsa04066	HIF-1 signaling pathway	8/413	109/8844	0.13665	0.399927	0.309088	LDHC/IFNGR1/ENO3/TLR4/PRKCA/SLC2A1/ENO2/PIK3R1	8
hsa00533	Metabolism	Glycan biosynthesis and metabolism	hsa00533	Glycosaminoglycan biosynthesis - keratan sulfate	2/413	14/8844	0.136852	0.399927	0.309088	CHST4/CHST2	2
hsa04940	Human Diseases	Endocrine and metabolic disease	hsa04940	Type I diabetes mellitus	4/413	43/8844	0.139485	0.403703	0.312007	CD86/IL1A/GZMB/HLA-DPA1	4
hsa05145	Human Diseases	Infectious disease: parasitic	hsa05145	Toxoplasmosis	8/413	111/8844	0.146993	0.420689	0.325135	IFNGR1/CASP8/STAT1/TLR4/TLR2/HLA-DPA1/LAMA1/BIRC3	8
hsa05332	Human Diseases	Immune disease	hsa05332	Graft-versus-host disease	4/413	44/8844	0.14815	0.420689	0.325135	CD86/IL1A/GZMB/HLA-DPA1	4
hsa05140	Human Diseases	Infectious disease: parasitic	hsa05140	Leishmaniasis	6/413	77/8844	0.149742	0.421235	0.325557	IFNGR1/STAT1/TLR4/IL1A/TLR2/HLA-DPA1	6
hsa03018	Genetic Information Processing	Folding, sorting and degradation	hsa03018	RNA degradation	6/413	78/8844	0.15629	0.435586	0.336648	EXOSC8/CNOT7/ENO3/ENO2/CNOT10/CNOT6L	6
hsa00360	Metabolism	Amino acid metabolism	hsa00360	Phenylalanine metabolism	2/413	16/8844	0.170003	0.469458	0.362826	MAOB/GOT2	2
hsa03250	Genetic Information Processing	Information processing in viruses	hsa03250	Viral life cycle - HIV-1	5/413	64/8844	0.178063	0.487245	0.376573	PSIP1/NUP153/CXCR4/RAN/BST2	5
hsa05207	Human Diseases	Cancer: overview	hsa05207	Chemical carcinogenesis - receptor activation	13/413	215/8844	0.205332	0.5568	0.43033	CDC25A/CDC6/BIRC5/KPNA2/RB1/E2F1/CCND1/ESR1/PRKCA/AHR/TNFSF11/MYC/PIK3R1	13
hsa04380	Organismal Systems	Development and regeneration	hsa04380	Osteoclast differentiation	9/413	142/8844	0.218748	0.584293	0.451578	IFNGR1/STAT1/IL1A/PPP3R1/SYK/IFNAR1/TNFSF11/LCP2/PIK3R1	9
hsa04664	Organismal Systems	Immune system	hsa04664	Fc epsilon RI signaling pathway	5/413	69/8844	0.219353	0.584293	0.451578	FCER1G/PRKCA/SYK/LCP2/PIK3R1	5
hsa05020	Human Diseases	Neurodegenerative disease	hsa05020	Prion disease	16/413	278/8844	0.227531	0.600761	0.464306	PSMD14/COX7B/BAX/EIF2S1/EGR1/UQCR10/C1QB/NDUFA6/KIF5A/APAF1/IL1A/PPP3R1/TUBB/NDUFA7/SDHB/PIK3R1	16
hsa05320	Human Diseases	Immune disease	hsa05320	Autoimmune thyroid disease	4/413	53/8844	0.233974	0.6124	0.473301	CD86/CTLA4/GZMB/HLA-DPA1	4
hsa05120	Human Diseases	Infectious disease: bacterial	hsa05120	Epithelial cell signaling in Helicobacter pylori infection	5/413	71/8844	0.236637	0.614032	0.474562	CXCL8/CXCL1/HBEGF/MET/CXCR2	5
hsa05143	Human Diseases	Infectious disease: parasitic	hsa05143	African trypanosomiasis	3/413	37/8844	0.248156	0.632886	0.489134	PRKCA/IL18/HBB	3
hsa00230	Metabolism	Nucleotide metabolism	hsa00230	Purine metabolism	8/413	128/8844	0.248401	0.632886	0.489134	RRM2/RRM1/HPRT1/DCK/DGUOK/PAICS/PRPS1/PNP	8
hsa05415	Human Diseases	Cardiovascular disease	hsa05415	Diabetic cardiomyopathy	12/413	205/8844	0.250211	0.632886	0.489134	PARP1/COX7B/SMAD3/UQCR10/NDUFA6/MMP9/GYS2/PRKCA/SLC2A1/NDUFA7/SDHB/PIK3R1	12
hsa05330	Human Diseases	Immune disease	hsa05330	Allograft rejection	3/413	38/8844	0.260896	0.654413	0.505771	CD86/GZMB/HLA-DPA1	3
hsa04621	Organismal Systems	Immune system	hsa04621	NOD-like receptor signaling pathway	11/413	189/8844	0.2687	0.66842	0.516597	IFI16/CASP8/STAT1/RIPK2/TLR4/CXCL8/CXCL1/IRF7/IFNAR1/IL18/BIRC3	11
hsa04657	Organismal Systems	Immune system	hsa04657	IL-17 signaling pathway	6/413	95/8844	0.283314	0.695703	0.537683	CASP8/MMP9/CXCL8/CSF3/CXCL1/CXCL10	6
hsa01240	Metabolism	Global and overview maps	hsa01240	Biosynthesis of cofactors	9/413	153/8844	0.28613	0.695703	0.537683	DHFR/MTHFD2/GCH1/GUSB/CTPS1/CMPK2/UMPS/GCLC/GCLM	9
hsa00500	Metabolism	Carbohydrate metabolism	hsa00500	Starch and sucrose metabolism	3/413	40/8844	0.286602	0.695703	0.537683	GYS2/AGL/PYGB	3
hsa04670	Organismal Systems	Immune system	hsa04670	Leukocyte transendothelial migration	7/413	116/8844	0.29808	0.715821	0.553231	MMP9/PTK2/PRKCA/CXCR4/ITK/CXCL12/PIK3R1	7
hsa05133	Human Diseases	Infectious disease: bacterial	hsa05133	Pertussis	5/413	78/8844	0.299646	0.715821	0.553231	CD14/C1QB/TLR4/IL1A/CXCL8	5
hsa04370	Environmental Information Processing	Signal transduction	hsa04370	VEGF signaling pathway	4/413	60/8844	0.307182	0.728046	0.562679	PTK2/PPP3R1/PRKCA/PIK3R1	4
hsa00534	Metabolism	Glycan biosynthesis and metabolism	hsa00534	Glycosaminoglycan biosynthesis - heparan sulfate / heparin	2/413	24/8844	0.309607	0.728061	0.562691	HS6ST2/B3GALT6	2
hsa04668	Environmental Information Processing	Signal transduction	hsa04668	TNF signaling pathway	7/413	119/8844	0.320694	0.748287	0.578323	CASP8/MMP9/RPS6KA5/CXCL1/CXCL10/BIRC3/PIK3R1	7
hsa04010	Environmental Information Processing	Signal transduction	hsa04010	MAPK signaling pathway	16/413	300/8844	0.327356	0.757954	0.585794	STMN1/STK3/STK4/RRAS2/CD14/EREG/RPS6KA5/TGFA/IL1A/PPP3R1/PRKCA/RASGRP1/CDC25B/MYC/MET/FLT3LG	16
hsa00310	Metabolism	Amino acid metabolism	hsa00310	Lysine degradation	4/413	63/8844	0.33933	0.779682	0.602587	EZH2/SUV39H1/PLOD2/COLGALT1	4
hsa04510	Cellular Processes	Cellular community - eukaryotes	hsa04510	Focal adhesion	11/413	203/8844	0.349755	0.795285	0.614646	CCND1/SPP1/PTK2/PRKCA/VWF/CCND2/MET/LAMA1/EMP1/BIRC3/PIK3R1	11
hsa02010	Environmental Information Processing	Membrane transport	hsa02010	ABC transporters	3/413	45/8844	0.351405	0.795285	0.614646	TAP2/TAP1/ABCB7	3
hsa04550	Cellular Processes	Cellular community - eukaryotes	hsa04550	Signaling pathways regulating pluripotency of stem cells	8/413	144/8844	0.358897	0.800231	0.618469	SMAD3/SOX2/AXIN2/MYC/ID4/ID3/ID2/PIK3R1	8
hsa04929	Organismal Systems	Endocrine system	hsa04929	GnRH secretion	4/413	65/8844	0.360836	0.800231	0.618469	GABBR1/SPP1/PRKCA/PIK3R1	4
hsa00062	Metabolism	Lipid metabolism	hsa00062	Fatty acid elongation	2/413	27/8844	0.361566	0.800231	0.618469	PPT1/ACAA2	2
hsa04611	Organismal Systems	Immune system	hsa04611	Platelet activation	7/413	125/8844	0.366671	0.805607	0.622623	PRKCI/FCER1G/RASGRP1/SYK/VWF/LCP2/PIK3R1	7
hsa00920	Metabolism	Energy metabolism	hsa00920	Sulfur metabolism	1/413	10/8844	0.38028	0.824223	0.637011	BPNT1	1
hsa05016	Human Diseases	Neurodegenerative disease	hsa05016	Huntington disease	16/413	311/8844	0.381006	0.824223	0.637011	PSMD14/HDAC2/COX7B/BAX/CASP8/UQCR10/NDUFA6/KIF5A/APAF1/POLR2I/TUBB/NDUFA7/SDHB/GPX3/POLR2D/SLC1A2	16
hsa04922	Organismal Systems	Endocrine system	hsa04922	Glucagon signaling pathway	6/413	107/8844	0.38336	0.824223	0.637011	LDHC/GYS2/PYGB/PPP3R1/SLC2A1/PRMT1	6
hsa05031	Human Diseases	Substance dependence	hsa05031	Amphetamine addiction	4/413	69/8844	0.403727	0.861856	0.666096	HDAC2/MAOB/PPP3R1/PRKCA	4
hsa00020	Metabolism	Carbohydrate metabolism	hsa00020	Citrate cycle (TCA cycle)	2/413	30/8844	0.412003	0.867222	0.670243	FH/SDHB	2
hsa01523	Human Diseases	Drug resistance: antineoplastic	hsa01523	Antifolate resistance	2/413	30/8844	0.412003	0.867222	0.670243	DHFR/TYMS	2
hsa04310	Environmental Information Processing	Signal transduction	hsa04310	Wnt signaling pathway	9/413	174/8844	0.425472	0.88926	0.687276	SMAD3/CCND1/PPP3R1/PRKCA/LEF1/AXIN2/MYC/CCND2/FRZB	9
hsa05310	Human Diseases	Immune disease	hsa05310	Asthma	2/413	31/8844	0.428381	0.88926	0.687276	FCER1G/HLA-DPA1	2
hsa04622	Organismal Systems	Immune system	hsa04622	RIG-I-like receptor signaling pathway	4/413	72/8844	0.435555	0.897959	0.693998	CASP8/CXCL8/IRF7/CXCL10	4
hsa04514	Environmental Information Processing	Signaling molecules and interaction	hsa04514	Cell adhesion molecules	8/413	157/8844	0.452119	0.921344	0.712072	CD86/CD274/SELP/ICOS/CTLA4/PTPRC/HLA-DPA1/SELL	8
hsa04961	Organismal Systems	Excretory system	hsa04961	Endocrine and other factor-regulated calcium reabsorption	3/413	53/8844	0.45302	0.921344	0.712072	ATP2B1/ESR1/PRKCA	3
hsa01200	Metabolism	Global and overview maps	hsa01200	Carbon metabolism	6/413	116/8844	0.458947	0.927135	0.716548	ENO3/FH/PRPS1/ENO2/SDHB/GOT2	6
hsa00190	Metabolism	Energy metabolism	hsa00190	Oxidative phosphorylation	7/413	138/8844	0.466875	0.930693	0.719298	COX7B/COX17/UQCR10/NDUFA6/LHPP/NDUFA7/SDHB	7
hsa01230	Metabolism	Global and overview maps	hsa01230	Biosynthesis of amino acids	4/413	75/8844	0.466892	0.930693	0.719298	ENO3/PRPS1/ENO2/GOT2	4
hsa00051	Metabolism	Carbohydrate metabolism	hsa00051	Fructose and mannose metabolism	2/413	34/8844	0.476006	0.942618	0.728514	AKR1B1/PFKFB4	2
hsa04360	Organismal Systems	Development and regeneration	hsa04360	Axon guidance	9/413	184/8844	0.492315	0.96854	0.748548	SLIT3/PTK2/PPP3R1/PRKCA/CXCR4/ROBO1/CXCL12/MET/PIK3R1	9
hsa05150	Human Diseases	Infectious disease: bacterial	hsa05150	Staphylococcus aureus infection	5/413	100/8844	0.50345	0.974169	0.752899	C3AR1/C1QB/CFD/SELP/HLA-DPA1	5
hsa00040	Metabolism	Carbohydrate metabolism	hsa00040	Pentose and glucuronate interconversions	2/413	36/8844	0.506389	0.974169	0.752899	AKR1B1/GUSB	2
hsa00350	Metabolism	Amino acid metabolism	hsa00350	Tyrosine metabolism	2/413	36/8844	0.506389	0.974169	0.752899	MAOB/GOT2	2
hsa04152	Environmental Information Processing	Signal transduction	hsa04152	AMPK signaling pathway	6/413	122/8844	0.508121	0.974169	0.752899	CCNA2/CCND1/GYS2/PFKFB4/CCNA1/PIK3R1	6
hsa00760	Metabolism	Metabolism of cofactors and vitamins	hsa00760	Nicotinate and nicotinamide metabolism	2/413	38/8844	0.535603	0.998825	0.771954	PNP/CD38	2
hsa04960	Organismal Systems	Excretory system	hsa04960	Aldosterone-regulated sodium reabsorption	2/413	38/8844	0.535603	0.998825	0.771954	PRKCA/PIK3R1	2
hsa04137	Cellular Processes	Transport and catabolism	hsa04137	Mitophagy - animal	5/413	105/8844	0.547189	0.998825	0.771954	E2F1/EIF2S1/RRAS2/BNIP3/OPA1	5
hsa04072	Environmental Information Processing	Signal transduction	hsa04072	Phospholipase D signaling pathway	7/413	149/8844	0.548653	0.998825	0.771954	RRAS2/FCER1G/PRKCA/CXCL8/SYK/CXCR2/PIK3R1	7
hsa00910	Metabolism	Energy metabolism	hsa00910	Nitrogen metabolism	1/413	17/8844	0.556812	0.998825	0.771954	CA9	1
hsa04014	Environmental Information Processing	Signal transduction	hsa04014	Ras signaling pathway	11/413	238/8844	0.558594	0.998825	0.771954	STK4/RRAS2/ETS2/REL/TGFA/PRKCA/RASGRP1/ABL2/MET/FLT3LG/PIK3R1	11
hsa04213	Organismal Systems	Aging	hsa04213	Longevity regulating pathway - multiple species	3/413	62/8844	0.558624	0.998825	0.771954	HDAC2/CRYAB/PIK3R1	3
hsa05217	Human Diseases	Cancer: specific types	hsa05217	Basal cell carcinoma	3/413	63/8844	0.569588	0.998825	0.771954	BAX/LEF1/AXIN2	3
hsa04980	NA	NA	hsa04980	Cobalamin transport and metabolism	1/413	18/8844	0.577548	0.998825	0.771954	MTRR	1
hsa04931	Human Diseases	Endocrine and metabolic disease	hsa04931	Insulin resistance	5/413	109/8844	0.580817	0.998825	0.771954	GYS2/PYGB/PPP1R3C/SLC2A1/PIK3R1	5
hsa04216	Cellular Processes	Cell growth and death	hsa04216	Ferroptosis	2/413	42/8844	0.590385	0.998825	0.771954	GCLC/GCLM	2
hsa00531	Metabolism	Glycan biosynthesis and metabolism	hsa00531	Glycosaminoglycan degradation	1/413	19/8844	0.597316	0.998825	0.771954	GUSB	1
hsa04512	Environmental Information Processing	Signaling molecules and interaction	hsa04512	ECM-receptor interaction	4/413	89/8844	0.602697	0.998825	0.771954	HMMR/SPP1/VWF/LAMA1	4
hsa04145	Cellular Processes	Transport and catabolism	hsa04145	Phagosome	7/413	157/8844	0.604622	0.998825	0.771954	CD14/TLR4/TLR2/TUBB/TAP2/HLA-DPA1/TAP1	7
hsa00010	Metabolism	Carbohydrate metabolism	hsa00010	Glycolysis / Gluconeogenesis	3/413	67/8844	0.611728	0.998825	0.771954	LDHC/ENO3/ENO2	3
hsa05208	Human Diseases	Cancer: overview	hsa05208	Chemical carcinogenesis - reactive oxygen species	10/413	226/8844	0.615872	0.998825	0.771954	COX7B/UQCR10/NDUFA6/PTK2/ABL2/NDUFA7/SDHB/AHR/MET/PIK3R1	10
hsa05012	Human Diseases	Neurodegenerative disease	hsa05012	Parkinson disease	12/413	271/8844	0.617926	0.998825	0.771954	PSMD14/COX7B/BAX/EIF2S1/MAOB/UQCR10/NDUFA6/KIF5A/APAF1/TUBB/NDUFA7/SDHB	12
hsa05131	Human Diseases	Infectious disease: bacterial	hsa05131	Shigellosis	11/413	249/8844	0.619499	0.998825	0.771954	BAX/CD14/RIPK2/RPS6KA5/TLR4/PTK2/BNIP3/CXCL8/IL18/ATM/PIK3R1	11
hsa04662	Organismal Systems	Immune system	hsa04662	B cell receptor signaling pathway	4/413	91/8844	0.620331	0.998825	0.771954	CR2/PPP3R1/SYK/PIK3R1	4
hsa04928	Organismal Systems	Endocrine system	hsa04928	Parathyroid hormone synthesis, secretion and action	5/413	115/8844	0.628644	0.998825	0.771954	EGR1/PRKCA/TNFSF11/HBEGF/NR4A2	5
hsa05135	Human Diseases	Infectious disease: bacterial	hsa05135	Yersinia infection	6/413	138/8844	0.629575	0.998825	0.771954	TLR4/PTK2/CXCL8/IL18/LCP2/PIK3R1	6
hsa04924	Organismal Systems	Endocrine system	hsa04924	Renin secretion	3/413	69/8844	0.631734	0.998825	0.771954	PPP3R1/EDN3/EDN2	3
hsa00532	Metabolism	Glycan biosynthesis and metabolism	hsa00532	Glycosaminoglycan biosynthesis - chondroitin sulfate / dermatan sulfate	1/413	21/8844	0.634126	0.998825	0.771954	B3GALT6	1
hsa00770	Metabolism	Metabolism of cofactors and vitamins	hsa00770	Pantothenate and CoA biosynthesis	1/413	21/8844	0.634126	0.998825	0.771954	DPYD	1
hsa04724	Organismal Systems	Nervous system	hsa04724	Glutamatergic synapse	5/413	116/8844	0.636288	0.998825	0.771954	PPP3R1/SLC38A1/PRKCA/HOMER1/SLC1A2	5
hsa04915	Organismal Systems	Endocrine system	hsa04915	Estrogen signaling pathway	6/413	139/8844	0.636572	0.998825	0.771954	GABBR1/MMP9/TGFA/ESR1/HBEGF/PIK3R1	6
hsa04520	Cellular Processes	Cellular community - eukaryotes	hsa04520	Adherens junction	4/413	93/8844	0.637468	0.998825	0.771954	SMAD3/LEF1/PTPRB/MET	4
hsa03050	Genetic Information Processing	Folding, sorting and degradation	hsa03050	Proteasome	2/413	46/8844	0.640218	0.998825	0.771954	PSMD14/PSME4	2
hsa04820	NA	NA	hsa04820	Cytoskeleton in muscle cells	10/413	232/8844	0.648842	0.998825	0.771954	LMNB1/LBR/DIAPH3/ENO3/MYH11/ENO2/COL5A3/TPM4/LAMA1/BGN	10
hsa00340	Metabolism	Amino acid metabolism	hsa00340	Histidine metabolism	1/413	22/8844	0.651252	0.998825	0.771954	MAOB	1
hsa00620	Metabolism	Carbohydrate metabolism	hsa00620	Pyruvate metabolism	2/413	47/8844	0.651906	0.998825	0.771954	LDHC/FH	2
hsa05010	Human Diseases	Neurodegenerative disease	hsa05010	Alzheimer disease	17/413	391/8844	0.656563	0.998825	0.771954	EIF2AK2/PSMD14/BID/COX7B/EIF2S1/CASP8/UQCR10/NDUFA6/KIF5A/APAF1/IL1A/PPP3R1/TUBB/NDUFA7/SDHB/AXIN2/PIK3R1	17
hsa04120	Genetic Information Processing	Folding, sorting and degradation	hsa04120	Ubiquitin mediated proteolysis	6/413	142/8844	0.657088	0.998825	0.771954	BRCA1/UBE2C/FANCL/CDC20/UBE2S/BIRC3	6
hsa04722	Organismal Systems	Nervous system	hsa04722	Neurotrophin signaling pathway	5/413	120/8844	0.665883	0.998825	0.771954	BAX/RIPK2/RPS6KA5/TP73/PIK3R1	5
hsa00220	Metabolism	Amino acid metabolism	hsa00220	Arginine biosynthesis	1/413	23/8844	0.667579	0.998825	0.771954	GOT2	1
hsa04614	Organismal Systems	Endocrine system	hsa04614	Renin-angiotensin system	1/413	23/8844	0.667579	0.998825	0.771954	ANPEP	1
hsa04970	Organismal Systems	Digestive system	hsa04970	Salivary secretion	4/413	97/8844	0.670206	0.998825	0.771954	ATP2B1/PRKCA/LYZ/CD38	4
hsa04666	Organismal Systems	Immune system	hsa04666	Fc gamma R-mediated phagocytosis	4/413	98/8844	0.678066	0.998825	0.771954	PRKCA/SYK/PTPRC/PIK3R1	4
hsa04071	Environmental Information Processing	Signal transduction	hsa04071	Sphingolipid signaling pathway	5/413	122/8844	0.680079	0.998825	0.771954	BID/BAX/FCER1G/PRKCA/PIK3R1	5
hsa04613	Organismal Systems	Immune system	hsa04613	Neutrophil extracellular trap formation	8/413	192/8844	0.680214	0.998825	0.771954	HDAC2/TLR4/TLR2/PRKCA/SYK/SELP/VWF/PIK3R1	8
hsa00330	Metabolism	Amino acid metabolism	hsa00330	Arginine and proline metabolism	2/413	50/8844	0.685161	0.998825	0.771954	MAOB/GOT2	2
hsa05110	Human Diseases	Infectious disease: bacterial	hsa05110	Vibrio cholerae infection	2/413	51/8844	0.695652	0.998825	0.771954	PRKCA/KDELR3	2
hsa00563	Metabolism	Glycan biosynthesis and metabolism	hsa00563	Glycosylphosphatidylinositol (GPI)-anchor biosynthesis	1/413	26/8844	0.712124	0.998825	0.771954	GPLD1	1
hsa05100	Human Diseases	Infectious disease: bacterial	hsa05100	Bacterial invasion of epithelial cells	3/413	78/8844	0.712763	0.998825	0.771954	PTK2/MET/PIK3R1	3
hsa04612	Organismal Systems	Immune system	hsa04612	Antigen processing and presentation	3/413	80/8844	0.728778	0.998825	0.771954	TAP2/HLA-DPA1/TAP1	3
hsa04972	Organismal Systems	Digestive system	hsa04972	Pancreatic secretion	4/413	106/8844	0.736223	0.998825	0.771954	ATP2B1/PRSS2/PRKCA/CD38	4
hsa05130	Human Diseases	Infectious disease: bacterial	hsa05130	Pathogenic Escherichia coli infection	8/413	203/8844	0.738409	0.998825	0.771954	BAX/CASP8/TNFSF10/TLR4/CXCL8/MYH11/TUBB/IL18	8
hsa00601	Metabolism	Glycan biosynthesis and metabolism	hsa00601	Glycosphingolipid biosynthesis - lacto and neolacto series	1/413	28/8844	0.73846	0.998825	0.771954	B3GNT3	1
hsa04340	Environmental Information Processing	Signal transduction	hsa04340	Hedgehog signaling pathway	2/413	56/8844	0.743842	0.998825	0.771954	CCND1/CCND2	2
hsa04392	Environmental Information Processing	Signal transduction	hsa04392	Hippo signaling pathway - multiple species	1/413	29/8844	0.750712	0.998825	0.771954	STK3	1
hsa01212	Metabolism	Global and overview maps	hsa01212	Fatty acid metabolism	2/413	57/8844	0.752658	0.998825	0.771954	PPT1/ACAA2	2
hsa00053	Metabolism	Carbohydrate metabolism	hsa00053	Ascorbate and aldarate metabolism	1/413	30/8844	0.762392	0.998825	0.771954	GUSB	1
hsa00030	Metabolism	Carbohydrate metabolism	hsa00030	Pentose phosphate pathway	1/413	31/8844	0.773525	0.998825	0.771954	PRPS1	1
hsa00410	Metabolism	Metabolism of other amino acids	hsa00410	beta-Alanine metabolism	1/413	31/8844	0.773525	0.998825	0.771954	DPYD	1
hsa04910	Organismal Systems	Endocrine system	hsa04910	Insulin signaling pathway	5/413	138/8844	0.778873	0.998825	0.771954	PRKCI/GYS2/PYGB/PPP1R3C/PIK3R1	5
hsa04260	Organismal Systems	Circulatory system	hsa04260	Cardiac muscle contraction	3/413	87/8844	0.779347	0.998825	0.771954	COX7B/UQCR10/TPM4	3
hsa00052	Metabolism	Carbohydrate metabolism	hsa00052	Galactose metabolism	1/413	32/8844	0.784138	0.998825	0.771954	AKR1B1	1
hsa00640	Metabolism	Carbohydrate metabolism	hsa00640	Propanoate metabolism	1/413	32/8844	0.784138	0.998825	0.771954	LDHC	1
hsa05322	Human Diseases	Immune disease	hsa05322	Systemic lupus erythematosus	5/413	139/8844	0.784183	0.998825	0.771954	CD86/C1QB/SNRPD1/SNRPB/HLA-DPA1	5
hsa04978	Organismal Systems	Digestive system	hsa04978	Mineral absorption	2/413	61/8844	0.785353	0.998825	0.771954	STEAP1/ATP2B1	2
hsa04371	Environmental Information Processing	Signal transduction	hsa04371	Apelin signaling pathway	5/413	140/8844	0.789394	0.998825	0.771954	RRAS2/SMAD3/CCND1/EGR1/SPP1	5
hsa04727	Organismal Systems	Nervous system	hsa04727	GABAergic synapse	3/413	89/8844	0.79229	0.998825	0.771954	GABBR1/SLC38A1/PRKCA	3
hsa04330	Environmental Information Processing	Signal transduction	hsa04330	Notch signaling pathway	2/413	62/8844	0.79291	0.998825	0.771954	HDAC2/HEY2	2
hsa01210	Metabolism	Global and overview maps	hsa01210	2-Oxocarboxylic acid metabolism	1/413	33/8844	0.794255	0.998825	0.771954	GOT2	1
hsa04710	Organismal Systems	Environmental adaptation	hsa04710	Circadian rhythm	1/413	34/8844	0.803899	0.998825	0.771954	NFIL3	1
hsa04540	Cellular Processes	Cellular community - eukaryotes	hsa04540	Gap junction	3/413	92/8844	0.810517	0.998825	0.771954	CDK1/PRKCA/TUBB	3
hsa05022	Human Diseases	Neurodegenerative disease	hsa05022	Pathways of neurodegeneration - multiple diseases	19/413	483/8844	0.814449	0.998825	0.771954	PSMD14/BID/COX7B/NEFH/BAX/EIF2S1/CASP8/UQCR10/NDUFA6/KIF5A/APAF1/IL1A/PPP3R1/PRKCA/TUBB/NDUFA7/SDHB/GPX3/AXIN2	19
hsa04912	Organismal Systems	Endocrine system	hsa04912	GnRH signaling pathway	3/413	93/8844	0.816285	0.998825	0.771954	EGR1/PRKCA/HBEGF	3
hsa00512	Metabolism	Glycan biosynthesis and metabolism	hsa00512	Mucin type O-glycan biosynthesis	1/413	36/8844	0.821855	0.998825	0.771954	B3GNT3	1
hsa04720	Organismal Systems	Nervous system	hsa04720	Long-term potentiation	2/413	67/8844	0.827274	0.998825	0.771954	PPP3R1/PRKCA	2
hsa04935	Organismal Systems	Endocrine system	hsa04935	Growth hormone synthesis, secretion and action	4/413	122/8844	0.828194	0.998825	0.771954	STAT1/PTK2/PRKCA/PIK3R1	4
hsa00250	Metabolism	Amino acid metabolism	hsa00250	Alanine, aspartate and glutamate metabolism	1/413	37/8844	0.830208	0.998825	0.771954	GOT2	1
hsa01250	Metabolism	Global and overview maps	hsa01250	Biosynthesis of nucleotide sugars	1/413	37/8844	0.830208	0.998825	0.771954	NANP	1
hsa00830	Metabolism	Metabolism of cofactors and vitamins	hsa00830	Retinol metabolism	2/413	68/8844	0.8335	0.998825	0.771954	RETSAT/ALDH1A1	2
hsa04925	Organismal Systems	Endocrine system	hsa04925	Aldosterone synthesis and secretion	3/413	98/8844	0.842937	0.998825	0.771954	ATP2B1/PRKCA/NR4A2	3
hsa04020	Environmental Information Processing	Signal transduction	hsa04020	Calcium signaling pathway	9/413	254/8844	0.845775	0.998825	0.771954	P2RX4/ATP2B1/TGFA/PPP3R1/PRKCA/CXCR4/TACR1/MET/CD38	9
hsa04261	Organismal Systems	Circulatory system	hsa04261	Adrenergic signaling in cardiomyocytes	5/413	154/8844	0.852438	0.998825	0.771954	SCN1B/ATP2B1/RPS6KA5/PRKCA/TPM4	5
hsa00260	Metabolism	Amino acid metabolism	hsa00260	Glycine, serine and threonine metabolism	1/413	41/8844	0.859891	0.998825	0.771954	MAOB	1
hsa04148	Cellular Processes	Transport and catabolism	hsa04148	Efferocytosis	5/413	156/8844	0.860025	0.998825	0.771954	ATP11C/C1QB/PTK2/SLC2A1/DNMT3A	5
hsa00380	Metabolism	Amino acid metabolism	hsa00380	Tryptophan metabolism	1/413	42/8844	0.866464	0.998825	0.771954	MAOB	1
hsa00513	Metabolism	Glycan biosynthesis and metabolism	hsa00513	Various types of N-glycan biosynthesis	1/413	42/8844	0.866464	0.998825	0.771954	ALG1	1
hsa04918	Organismal Systems	Endocrine system	hsa04918	Thyroid hormone synthesis	2/413	75/8844	0.871691	0.998825	0.771954	PRKCA/GPX3	2
hsa00071	Metabolism	Lipid metabolism	hsa00071	Fatty acid degradation	1/413	43/8844	0.87273	0.998825	0.771954	ACAA2	1
hsa04975	Organismal Systems	Digestive system	hsa04975	Fat digestion and absorption	1/413	43/8844	0.87273	0.998825	0.771954	GOT2	1
hsa04974	Organismal Systems	Digestive system	hsa04974	Protein digestion and absorption	3/413	105/8844	0.874596	0.998825	0.771954	DPP4/PRSS2/COL5A3	3
hsa04270	Organismal Systems	Circulatory system	hsa04270	Vascular smooth muscle contraction	4/413	134/8844	0.878268	0.998825	0.771954	PRKCA/EDN3/MYH11/EDN2	4
hsa03022	Genetic Information Processing	Transcription	hsa03022	Basal transcription factors	1/413	44/8844	0.878702	0.998825	0.771954	MNAT1	1
hsa00860	Metabolism	Metabolism of cofactors and vitamins	hsa00860	Porphyrin metabolism	1/413	46/8844	0.889821	0.998825	0.771954	GUSB	1
hsa00514	Metabolism	Glycan biosynthesis and metabolism	hsa00514	Other types of O-glycan biosynthesis	1/413	47/8844	0.894993	0.998825	0.771954	COLGALT1	1
hsa04930	Human Diseases	Endocrine and metabolic disease	hsa04930	Type II diabetes mellitus	1/413	47/8844	0.894993	0.998825	0.771954	PIK3R1	1
hsa00280	Metabolism	Amino acid metabolism	hsa00280	Valine, leucine and isoleucine degradation	1/413	48/8844	0.899923	0.998825	0.771954	ACAA2	1
hsa05418	Human Diseases	Cardiovascular disease	hsa05418	Fluid shear stress and atherosclerosis	4/413	141/8844	0.901224	0.998825	0.771954	MMP9/IL1A/PTK2/PIK3R1	4
hsa04530	Cellular Processes	Cellular community - eukaryotes	hsa04530	Tight junction	5/413	170/8844	0.904474	0.998825	0.771954	PCNA/CCND1/PRKCI/MYH11/CDK4	5
hsa05030	Human Diseases	Substance dependence	hsa05030	Cocaine addiction	1/413	49/8844	0.904622	0.998825	0.771954	MAOB	1
hsa00520	Metabolism	Carbohydrate metabolism	hsa00520	Amino sugar and nucleotide sugar metabolism	1/413	50/8844	0.909101	0.998825	0.771954	NANP	1
hsa00565	Metabolism	Lipid metabolism	hsa00565	Ether lipid metabolism	1/413	50/8844	0.909101	0.998825	0.771954	UGT8	1
hsa05017	Human Diseases	Neurodegenerative disease	hsa05017	Spinocerebellar ataxia	4/413	144/8844	0.909836	0.998825	0.771954	PSMD14/PRKCA/OPA1/PIK3R1	4
hsa04911	Organismal Systems	Endocrine system	hsa04911	Insulin secretion	2/413	86/8844	0.915746	0.998825	0.771954	PRKCA/SLC2A1	2
hsa05412	Human Diseases	Cardiovascular disease	hsa05412	Arrhythmogenic right ventricular cardiomyopathy	2/413	86/8844	0.915746	0.998825	0.771954	LEF1/LAMA1	2
hsa03082	Genetic Information Processing	Chromosome	hsa03082	ATP-dependent chromatin remodeling	3/413	117/8844	0.915912	0.998825	0.771954	HDAC2/RBBP7/ING3	3
hsa04973	Organismal Systems	Digestive system	hsa04973	Carbohydrate digestion and absorption	1/413	52/8844	0.917439	0.998825	0.771954	PIK3R1	1
hsa04810	Cellular Processes	Cell motility	hsa04810	Regulation of actin cytoskeleton	7/413	230/8844	0.918011	0.998825	0.771954	RRAS2/DIAPH3/PTK2/CXCR4/MYH11/CXCL12/PIK3R1	7
hsa00510	Metabolism	Glycan biosynthesis and metabolism	hsa00510	N-Glycan biosynthesis	1/413	53/8844	0.921317	0.998825	0.771954	ALG1	1
hsa00600	Metabolism	Lipid metabolism	hsa00600	Sphingolipid metabolism	1/413	54/8844	0.925014	0.998825	0.771954	UGT8	1
hsa04211	Organismal Systems	Aging	hsa04211	Longevity regulating pathway	2/413	90/8844	0.927908	0.998825	0.771954	BAX/PIK3R1	2
hsa05032	Human Diseases	Substance dependence	hsa05032	Morphine addiction	2/413	91/8844	0.930679	0.998825	0.771954	GABBR1/PRKCA	2
hsa04921	Organismal Systems	Endocrine system	hsa04921	Oxytocin signaling pathway	4/413	154/8844	0.933922	0.998825	0.771954	CCND1/PPP3R1/PRKCA/CD38	4
hsa04923	Organismal Systems	Endocrine system	hsa04923	Regulation of lipolysis in adipocytes	1/413	59/8844	0.941054	0.998825	0.771954	PIK3R1	1
hsa04730	Organismal Systems	Nervous system	hsa04730	Long-term depression	1/413	60/8844	0.943825	0.998825	0.771954	PRKCA	1
hsa04713	Organismal Systems	Environmental adaptation	hsa04713	Circadian entrainment	2/413	97/8844	0.945303	0.998825	0.771954	RPS6KA5/PRKCA	2
hsa04926	Organismal Systems	Endocrine system	hsa04926	Relaxin signaling pathway	3/413	130/8844	0.946385	0.998825	0.771954	MMP9/PRKCA/PIK3R1	3
hsa04070	Environmental Information Processing	Signal transduction	hsa04070	Phosphatidylinositol signaling system	2/413	98/8844	0.947436	0.998825	0.771954	PRKCA/PIK3R1	2
hsa00140	Metabolism	Lipid metabolism	hsa00140	Steroid hormone biosynthesis	1/413	62/8844	0.948983	0.998825	0.771954	SULT2B1	1
hsa04750	Organismal Systems	Sensory system	hsa04750	Inflammatory mediator regulation of TRP channels	2/413	99/8844	0.949489	0.998825	0.771954	PRKCA/PIK3R1	2
hsa05231	Human Diseases	Cancer: overview	hsa05231	Choline metabolism in cancer	2/413	99/8844	0.949489	0.998825	0.771954	PRKCA/PIK3R1	2
hsa05410	Human Diseases	Cardiovascular disease	hsa05410	Hypertrophic cardiomyopathy	2/413	99/8844	0.949489	0.998825	0.771954	TPM4/LAMA1	2
hsa04142	Cellular Processes	Transport and catabolism	hsa04142	Lysosome	3/413	132/8844	0.950042	0.998825	0.771954	LAMP3/GUSB/PPT1	3
hsa04728	Organismal Systems	Nervous system	hsa04728	Dopaminergic synapse	3/413	132/8844	0.950042	0.998825	0.771954	MAOB/KIF5A/PRKCA	3
hsa04916	Organismal Systems	Endocrine system	hsa04916	Melanogenesis	2/413	101/8844	0.953369	0.998825	0.771954	PRKCA/LEF1	2
hsa00561	Metabolism	Lipid metabolism	hsa00561	Glycerolipid metabolism	1/413	65/8844	0.955849	0.998825	0.771954	AKR1B1	1
hsa04024	Environmental Information Processing	Signal transduction	hsa04024	cAMP signaling pathway	6/413	226/8844	0.95679	0.998825	0.771954	RRAS2/GABBR1/ATP2B1/EDN3/EDN2/PIK3R1	6
hsa03015	Genetic Information Processing	Translation	hsa03015	mRNA surveillance pathway	2/413	103/8844	0.956963	0.998825	0.771954	NUDT21/UPF3B	2
hsa04140	Cellular Processes	Transport and catabolism	hsa04140	Autophagy - animal	4/413	169/8844	0.959273	0.998825	0.771954	EIF2S1/RRAS2/BNIP3/PIK3R1	4
hsa05414	Human Diseases	Cardiovascular disease	hsa05414	Dilated cardiomyopathy	2/413	105/8844	0.960292	0.998825	0.771954	TPM4/LAMA1	2
hsa03010	Genetic Information Processing	Translation	hsa03010	Ribosome	4/413	172/8844	0.963116	0.998825	0.771954	MRPS15/MRPS11/MRPL35/MRPL11	4
hsa04920	Organismal Systems	Endocrine system	hsa04920	Adipocytokine signaling pathway	1/413	70/8844	0.965304	0.998825	0.771954	SLC2A1	1
hsa04714	Organismal Systems	Environmental adaptation	hsa04714	Thermogenesis	6/413	235/8844	0.966757	0.998825	0.771954	COX7B/COX17/UQCR10/NDUFA6/NDUFA7/SDHB	6
hsa00982	Metabolism	Xenobiotics biodegradation and metabolism	hsa00982	Drug metabolism - cytochrome P450	1/413	73/8844	0.969977	0.998825	0.771954	MAOB	1
hsa04015	Environmental Information Processing	Signal transduction	hsa04015	Rap1 signaling pathway	5/413	212/8844	0.972876	0.998825	0.771954	PRKCI/PRKCA/MET/LCP2/PIK3R1	5
hsa04723	Organismal Systems	Nervous system	hsa04723	Retrograde endocannabinoid signaling	3/413	149/8844	0.972958	0.998825	0.771954	NDUFA6/PRKCA/NDUFA7	3
hsa04725	Organismal Systems	Nervous system	hsa04725	Cholinergic synapse	2/413	115/8844	0.973555	0.998825	0.771954	PRKCA/PIK3R1	2
hsa04726	Organismal Systems	Nervous system	hsa04726	Serotonergic synapse	2/413	115/8844	0.973555	0.998825	0.771954	MAOB/PRKCA	2
hsa04971	Organismal Systems	Digestive system	hsa04971	Gastric acid secretion	1/413	76/8844	0.974022	0.998825	0.771954	PRKCA	1
hsa04721	Organismal Systems	Nervous system	hsa04721	Synaptic vesicle cycle	1/413	79/8844	0.977523	0.998825	0.771954	SLC1A2	1
hsa03040	Genetic Information Processing	Transcription	hsa03040	Spliceosome	5/413	218/8844	0.977605	0.998825	0.771954	TRA2B/SNRPD1/SRSF10/PHF5A/SNRPB	5
hsa04150	Environmental Information Processing	Signal transduction	hsa04150	mTOR signaling pathway	3/413	158/8844	0.980631	0.998825	0.771954	PRKCA/SLC7A5/PIK3R1	3
hsa04742	Organismal Systems	Sensory system	hsa04742	Taste transduction	1/413	86/8844	0.983969	0.998825	0.771954	GABBR1	1
hsa04976	Organismal Systems	Digestive system	hsa04976	Bile secretion	1/413	90/8844	0.986786	0.998825	0.771954	SLC2A1	1
hsa04141	Genetic Information Processing	Folding, sorting and degradation	hsa04141	Protein processing in endoplasmic reticulum	3/413	170/8844	0.98769	0.998825	0.771954	BAX/EIF2S1/CRYAB	3
hsa04144	Cellular Processes	Transport and catabolism	hsa04144	Endocytosis	5/413	252/8844	0.992774	0.998825	0.771954	SMAD3/PRKCI/KIF5A/CXCR4/CXCR2	5
hsa04022	Environmental Information Processing	Signal transduction	hsa04022	cGMP-PKG signaling pathway	2/413	166/8844	0.99693	0.998825	0.771954	ATP2B1/PPP3R1	2
hsa03008	Genetic Information Processing	Translation	hsa03008	Ribosome biogenesis in eukaryotes	2/413	168/8844	0.997185	0.998825	0.771954	POP7/RAN	2
hsa04080	Environmental Information Processing	Signaling molecules and interaction	hsa04080	Neuroactive ligand-receptor interaction	7/413	368/8844	0.998721	0.998825	0.771954	C3AR1/GABBR1/P2RX4/PRSS2/EDN3/EDN2/TACR1	7
hsa05034	Human Diseases	Substance dependence	hsa05034	Alcoholism	2/413	188/8844	0.998825	0.998825	0.771954	HDAC2/MAOB	2
