# Supplementary material
Source: Research Square preprint supplement (doi:10.21203/rs.3.rs-8884166/v1)
Supplement: Supplementary file 5 [file ab465febe96225b6950f960a.xlsx]

## Sheet: Online Resource 1
	ONTOLOGY	ID	Description	GeneRatio	BgRatio	pvalue	p.adjust	qvalue	geneID	Count	richFactor
GO:0000280	BP	GO:0000280	nuclear division	93/605	441/18870	1.18E-49	5.44E-46	4.04E-46	NUSAP1/ZWILCH/ZWINT/BRIP1/CDK1/RAD51AP1/CDCA2/CHEK1/RACGAP1/MKI67/CKS2/DLGAP5/TTK/AURKA/NEK2/KIF23/RAD51/CCNB1/SPC25/SMC2/CCNE2/CCNB2/KIF11/BORA/ANLN/ASPM/SPAG5/PRC1/NUF2/MYBL2/NDC80/KIF2C/CDCA5/CENPF/KIF4A/TOP2A/CDC25C/KIF20B/BUB1B/TRIP13/FBXO5/BUB3/SMC4/KIF14/RAD51C/SMC1A/CENPE/RAD54L/PSMC3IP/FANCD2/BUB1/UBE2C/PTTG1/BIRC5/MAD2L1/STAG1/KIFC1/RB1/CDCA8/FANCA/DSN1/CCNE1/BRCA2/MZT1/SPC24/PTTG3P/MND…	93	2.10884
GO:0048285	BP	GO:0048285	organelle fission	95/605	488/18870	1.64E-47	3.79E-44	2.81E-44	NUSAP1/ZWILCH/ZWINT/BRIP1/CDK1/RAD51AP1/CDCA2/CHEK1/RACGAP1/MKI67/CKS2/DLGAP5/TTK/AURKA/NEK2/KIF23/RAD51/CCNB1/SPC25/SMC2/CCNE2/CCNB2/KIF11/BORA/ANLN/ASPM/SPAG5/PRC1/NUF2/MYBL2/NDC80/KIF2C/CDCA5/CENPF/KIF4A/TOP2A/CDC25C/KIF20B/BUB1B/TRIP13/FBXO5/BUB3/SMC4/KIF14/RAD51C/SMC1A/CENPE/RAD54L/PSMC3IP/FANCD2/BUB1/UBE2C/PTTG1/BIRC5/MAD2L1/STAG1/KIFC1/RB1/CDCA8/FANCA/DSN1/CCNE1/BRCA2/MZT1/SPC24/PTTG3P/MND…	95	1.94672
GO:0044772	BP	GO:0044772	mitotic cell cycle phase transition	93/605	470/18870	3.93E-47	6.05E-44	4.49E-44	DTL/CDC7/ZWILCH/ZWINT/CDK1/STIL/CHEK1/CDC25A/CKS2/DLGAP5/TTK/AURKA/DBF4/CDKN2A/BLM/CCNB1/SPC25/CCNE2/MELK/RBL1/CCNB2/ANLN/RRM2/CKS1B/CCNA2/CDC6/NUF2/CDKN3/NDC80/E2F7/EZH2/DONSON/CDCA5/CENPF/CDC25C/CDK2/BUB1B/TRIP13/FBXO5/BRCA1/CLSPN/BUB3/KIF14/RRM1/CDKN2C/RAD51C/CENPE/BUB1/TACC3/UBE2C/CENPJ/BIRC5/MAD2L1/FOXM1/BARD1/RB1/E2F1/CDCA8/CASP2/BID/E2F2/CCNE1/CCNF/SPC24/CDC20/WEE1/AURKB/RPA2/CCND1/CRADD/R…	93	1.97872
GO:0007059	BP	GO:0007059	chromosome segregation	88/605	424/18870	2.40E-46	2.77E-43	2.06E-43	NUSAP1/ZWILCH/ZWINT/BRIP1/ESCO2/CDK1/CDCA2/STIL/RACGAP1/MKI67/DLGAP5/TTK/AURKA/NEK2/KIF23/CCNB1/SPC25/SMC2/CCNE2/CCNB2/KIF11/ASPM/CDC6/SPAG5/PRC1/NUF2/MYBL2/NDC80/KIF2C/CDCA5/CENPF/KIF4A/ECT2/TOP2A/BUB1B/TRIP13/FBXO5/BRCA1/BUB3/SMC4/KIF14/SMC1A/CENPE/PSMC3IP/FANCD2/CENPW/BUB1/TACC3/UBE2C/PTTG1/CENPJ/BIRC5/MAD2L1/HJURP/STAG1/KIFC1/RB1/CDCA8/CENPM/DSN1/CCNE1/MZT1/SPC24/PTTG3P/MND1/PSRC1/CDC20/TPX2/…	88	2.07547
GO:0006260	BP	GO:0006260	DNA replication	73/605	278/18870	5.55E-46	5.12E-43	3.80E-43	DTL/MCM6/CDC7/MCM4/RFC3/POLE2/TIPIN/ESCO2/GINS2/CDK1/CHEK1/PRIM2/GINS1/PRIM1/DBF4/RAD51/E2F8/BLM/CCNE2/DSCC1/PCNA/RRM2/CCNA2/CDC6/FEN1/RPA3/E2F7/POLA1/CHAF1A/DONSON/CDK2/TK1/FBXO5/BRCA1/ORC6/PARP1/RNASEH2A/RRM1/MCM2/CDC45/ORC5/RFC4/POLQ/RPA1/BARD1/CHAF1B/GINS3/DUT/CCNE1/BRCA2/MCM3/TIMELESS/MCM5/RBBP7/EREG/RPA2/POLA2/LIG1/ATR/POLD3/PIF1/MCM7/POLE/SET/FANCM/CCDC88A/NASP/POLE4/POLD1/NUCKS1/SMC3/RFC2…	73	2.6259
GO:0140014	BP	GO:0140014	mitotic nuclear division	70/605	274/18870	3.17E-43	2.44E-40	1.81E-40	NUSAP1/ZWILCH/ZWINT/CDK1/CDCA2/CHEK1/RACGAP1/MKI67/DLGAP5/TTK/AURKA/NEK2/KIF23/CCNB1/SPC25/SMC2/KIF11/BORA/ANLN/SPAG5/PRC1/NUF2/MYBL2/NDC80/KIF2C/CDCA5/CENPF/KIF4A/CDC25C/KIF20B/BUB1B/TRIP13/FBXO5/BUB3/SMC4/KIF14/SMC1A/CENPE/BUB1/UBE2C/BIRC5/MAD2L1/STAG1/KIFC1/RB1/CDCA8/DSN1/MZT1/SPC24/PSRC1/CDC20/TPX2/AURKB/EREG/RANBP1/KIF18B/RAD21/KIF22/TGFA/IL1A/ZW10/UBE2S/KIF2A/ESPL1/EDN3/RAN/CHEK2/TUBG1/ATM/…	70	2.55474
GO:1901987	BP	GO:1901987	regulation of cell cycle phase transition	87/605	456/18870	1.01E-42	6.69E-40	4.97E-40	DTL/CDC7/TIPIN/ZWILCH/ZWINT/BRIP1/CDK1/STIL/CHEK1/CDC25A/DLGAP5/TTK/AURKA/DBF4/CDKN2A/RAD51/BLM/CCNB1/SPC25/RBL1/ANLN/RRM2/CDC6/NUF2/NDC80/E2F7/EZH2/DONSON/CDCA5/CENPF/CDC25C/WDR76/CDK2/BUB1B/TRIP13/FBXO5/BRCA1/CLSPN/BUB3/KIF14/RRM1/CDKN2C/RAD51C/CDC45/CENPE/FANCD2/BUB1/UBE2C/CENPJ/BIRC5/MAD2L1/BARD1/RB1/E2F1/CDCA8/CASP2/BID/BRCA2/TIMELESS/SPC24/CDC20/WEE1/AURKB/RPA2/CCND1/ATR/CRADD/RAD21/FAM83D/…	87	1.90789
GO:0098813	BP	GO:0098813	nuclear chromosome segregation	73/605	312/18870	3.29E-42	1.90E-39	1.41E-39	NUSAP1/ZWILCH/ZWINT/BRIP1/CDK1/RACGAP1/DLGAP5/TTK/AURKA/NEK2/KIF23/CCNB1/SPC25/SMC2/CCNE2/CCNB2/KIF11/ASPM/CDC6/SPAG5/PRC1/NUF2/MYBL2/NDC80/KIF2C/CDCA5/CENPF/KIF4A/ECT2/TOP2A/BUB1B/TRIP13/FBXO5/BUB3/SMC4/KIF14/SMC1A/CENPE/PSMC3IP/FANCD2/BUB1/TACC3/UBE2C/PTTG1/BIRC5/MAD2L1/STAG1/KIFC1/RB1/CDCA8/DSN1/CCNE1/MZT1/SPC24/PTTG3P/MND1/PSRC1/CDC20/TPX2/AURKB/KIF18B/RAD21/FAM83D/KIF22/ZW10/KIF2A/ESPL1/MLH1…	73	2.33974
GO:0000070	BP	GO:0000070	mitotic sister chromatid segregation	56/605	184/18870	3.30E-39	1.69E-36	1.25E-36	NUSAP1/ZWILCH/ZWINT/CDK1/RACGAP1/DLGAP5/TTK/NEK2/KIF23/CCNB1/SPC25/SMC2/KIF11/SPAG5/PRC1/NUF2/MYBL2/NDC80/KIF2C/CDCA5/CENPF/KIF4A/BUB1B/TRIP13/FBXO5/BUB3/SMC4/KIF14/SMC1A/CENPE/BUB1/UBE2C/BIRC5/MAD2L1/STAG1/KIFC1/RB1/CDCA8/DSN1/MZT1/SPC24/PSRC1/CDC20/TPX2/AURKB/KIF18B/RAD21/KIF22/ZW10/KIF2A/ESPL1/RAN/CHEK2/TUBG1/ATM/SMC3	56	3.04348
GO:0006261	BP	GO:0006261	DNA-templated DNA replication	53/605	161/18870	3.83E-39	1.77E-36	1.31E-36	MCM6/CDC7/MCM4/RFC3/POLE2/TIPIN/GINS2/PRIM2/GINS1/PRIM1/DBF4/RAD51/E2F8/BLM/CCNE2/DSCC1/PCNA/CDC6/FEN1/E2F7/POLA1/DONSON/CDK2/TK1/FBXO5/BRCA1/ORC6/PARP1/RRM1/MCM2/CDC45/ORC5/RFC4/POLQ/RPA1/BARD1/GINS3/CCNE1/BRCA2/MCM3/TIMELESS/MCM5/POLA2/LIG1/ATR/POLD3/MCM7/POLE/FANCM/POLE4/POLD1/NUCKS1/RFC2	53	3.29193
GO:1901990	BP	GO:1901990	regulation of mitotic cell cycle phase transition	73/605	355/18870	3.95E-38	1.65E-35	1.23E-35	DTL/CDC7/ZWILCH/ZWINT/CDK1/STIL/CHEK1/CDC25A/DLGAP5/TTK/AURKA/CDKN2A/BLM/CCNB1/SPC25/RBL1/ANLN/RRM2/CDC6/NUF2/NDC80/E2F7/EZH2/DONSON/CDCA5/CENPF/CDC25C/CDK2/BUB1B/TRIP13/FBXO5/BRCA1/CLSPN/BUB3/KIF14/RRM1/CDKN2C/RAD51C/CENPE/BUB1/UBE2C/CENPJ/BIRC5/MAD2L1/BARD1/RB1/E2F1/CDCA8/CASP2/BID/SPC24/CDC20/WEE1/AURKB/RPA2/CCND1/CRADD/RAD21/ZW10/PRKDC/TFDP1/FOXN3/MNAT1/ESPL1/PIDD1/CDC25B/CDK4/CHEK2/ATM/CCND2…	73	2.05634
GO:0000819	BP	GO:0000819	sister chromatid segregation	59/605	225/18870	3.40E-37	1.31E-34	9.70E-35	NUSAP1/ZWILCH/ZWINT/CDK1/RACGAP1/DLGAP5/TTK/NEK2/KIF23/CCNB1/SPC25/SMC2/KIF11/CDC6/SPAG5/PRC1/NUF2/MYBL2/NDC80/KIF2C/CDCA5/CENPF/KIF4A/TOP2A/BUB1B/TRIP13/FBXO5/BUB3/SMC4/KIF14/SMC1A/CENPE/BUB1/TACC3/UBE2C/BIRC5/MAD2L1/STAG1/KIFC1/RB1/CDCA8/DSN1/MZT1/SPC24/PSRC1/CDC20/TPX2/AURKB/KIF18B/RAD21/KIF22/ZW10/KIF2A/ESPL1/RAN/CHEK2/TUBG1/ATM/SMC3	59	2.62222
GO:0010948	BP	GO:0010948	negative regulation of cell cycle process	64/605	320/18870	1.01E-32	3.58E-30	2.66E-30	DTL/TIPIN/ZWILCH/ZWINT/BRIP1/CDK1/CHEK1/TTK/NEK2/RAD51/E2F8/BLM/CCNB1/SPC25/RBL1/CDC6/NUF2/NDC80/E2F7/EZH2/DONSON/CENPF/WDR76/CDK2/BUB1B/TRIP13/FBXO5/BRCA1/CLSPN/BUB3/CDC45/FANCD2/BUB1/CCP110/BIRC5/MAD2L1/BARD1/RB1/E2F1/CDCA8/CASP2/BRCA2/TIMELESS/CCNF/SPC24/CDC20/WEE1/AURKB/RPA2/CCND1/ATR/CRADD/RAD21/ZW10/SOX2/PRKDC/FOXN3/ESPL1/MSH2/PIDD1/CHEK2/ATM/XPC/BABAM1	64	2
GO:0000075	BP	GO:0000075	cell cycle checkpoint signaling	51/605	192/18870	1.50E-32	4.93E-30	3.66E-30	DTL/TIPIN/ZWILCH/ZWINT/BRIP1/CDK1/CHEK1/TTK/RAD51/BLM/CCNB1/SPC25/CDC6/NUF2/NDC80/DONSON/CENPF/WDR76/CDK2/BUB1B/TRIP13/BRCA1/CLSPN/BUB3/CDC45/FANCD2/BUB1/BIRC5/MAD2L1/BARD1/E2F1/CDCA8/CASP2/BRCA2/TIMELESS/SPC24/CDC20/AURKB/RPA2/CCND1/ATR/CRADD/ZW10/PRKDC/FOXN3/MSH2/PIDD1/CHEK2/ATM/XPC/BABAM1	51	2.65625
GO:1901988	BP	GO:1901988	negative regulation of cell cycle phase transition	59/605	277/18870	8.67E-32	2.66E-29	1.98E-29	DTL/TIPIN/ZWILCH/ZWINT/BRIP1/CDK1/CHEK1/TTK/RAD51/BLM/CCNB1/SPC25/RBL1/CDC6/NUF2/NDC80/E2F7/EZH2/DONSON/CENPF/WDR76/CDK2/BUB1B/TRIP13/FBXO5/BRCA1/CLSPN/BUB3/CDC45/FANCD2/BUB1/BIRC5/MAD2L1/BARD1/RB1/E2F1/CDCA8/CASP2/BRCA2/TIMELESS/SPC24/CDC20/WEE1/AURKB/RPA2/CCND1/ATR/CRADD/RAD21/ZW10/SOX2/PRKDC/FOXN3/MSH2/PIDD1/CHEK2/ATM/XPC/BABAM1	59	2.12996
GO:0090068	BP	GO:0090068	positive regulation of cell cycle process	57/605	262/18870	2.98E-31	8.58E-29	6.37E-29	DTL/CDC7/NUSAP1/CDK1/RAD51AP1/STIL/RACGAP1/CDC25A/DLGAP5/AURKA/DBF4/KIF23/E2F8/CCNB1/SMC2/PLK4/RRM2/CDC6/SPAG5/FEN1/NDC80/E2F7/EZH2/CDCA5/ECT2/CDC25C/KIF20B/FBXO5/SMC4/KIF14/RRM1/RAD51C/BUB1/UBE2C/CENPJ/BIRC5/MAD2L1/RB1/CDCA8/CDC20/GPSM2/AURKB/EREG/CCND1/SMC6/RANBP1/RAD21/FAM83D/TGFA/IL1A/TFDP1/ESPL1/EDN3/CDC25B/CDK4/MED1/CCND2	57	2.17557
GO:0045787	BP	GO:0045787	positive regulation of cell cycle	63/605	334/18870	1.11E-30	3.01E-28	2.24E-28	DTL/CDC7/NUSAP1/CDK1/RAD51AP1/STIL/CHEK1/RACGAP1/CDC25A/DLGAP5/AURKA/DBF4/KIF23/E2F8/CCNB1/SMC2/PLK4/RRM2/CDC6/SPAG5/FEN1/NDC80/E2F7/EZH2/CDCA5/ECT2/CDC25C/KIF20B/FBXO5/SMC4/KIF14/RRM1/RAD51C/BUB1/UBE2C/CENPJ/BIRC5/MAD2L1/RB1/CDCA8/BRCA2/PSRC1/FOXA1/CDC20/GPSM2/BCL2L11/AURKB/EREG/CCND1/SMC6/RANBP1/RAD21/FAM83D/TGFA/IL1A/TFDP1/PRKCA/ESPL1/EDN3/CDC25B/CDK4/MED1/CCND2	63	1.88623
GO:0007093	BP	GO:0007093	mitotic cell cycle checkpoint signaling	43/605	142/18870	3.30E-30	8.45E-28	6.28E-28	DTL/TIPIN/ZWILCH/ZWINT/CDK1/CHEK1/TTK/BLM/CCNB1/SPC25/CDC6/NUF2/NDC80/DONSON/CENPF/CDK2/BUB1B/TRIP13/BRCA1/CLSPN/BUB3/FANCD2/BUB1/BIRC5/MAD2L1/BARD1/CDCA8/CASP2/SPC24/CDC20/AURKB/RPA2/CCND1/CRADD/ZW10/PRKDC/FOXN3/MSH2/PIDD1/CHEK2/ATM/XPC/BABAM1	43	3.02817
GO:0007088	BP	GO:0007088	regulation of mitotic nuclear division	39/605	118/18870	3.93E-29	9.54E-27	7.09E-27	NUSAP1/ZWILCH/ZWINT/CDCA2/CHEK1/MKI67/DLGAP5/TTK/AURKA/NEK2/CCNB1/SPC25/BORA/NUF2/NDC80/CENPF/CDC25C/KIF20B/BUB1B/TRIP13/FBXO5/BUB3/BUB1/UBE2C/BIRC5/MAD2L1/RB1/CDCA8/SPC24/CDC20/AURKB/EREG/RAD21/TGFA/IL1A/ZW10/ESPL1/EDN3/ATM	39	3.30508
GO:1902850	BP	GO:1902850	microtubule cytoskeleton organization involved in mitosis	44/605	163/18870	1.54E-28	3.56E-26	2.64E-26	NUSAP1/CDK1/STIL/RACGAP1/DLGAP5/TTK/AURKA/NEK2/KIF23/CCNB1/SPC25/KIF11/BORA/STMN1/PRC1/NUF2/MYBL2/NDC80/KIF4A/SMC1A/CENPE/TACC3/CENPJ/BIRC5/CENPA/MAD2L1/STAG1/KIFC1/CDCA8/RAE1/MZT1/PSRC1/CDC20/TPX2/GPSM2/AURKB/CKAP5/ZW10/KIF2A/ESPL1/RAN/CHEK2/TUBG1/SMC3	44	2.69939
GO:0045786	BP	GO:0045786	negative regulation of cell cycle	66/605	407/18870	4.42E-28	9.71E-26	7.21E-26	DTL/TIPIN/ZWILCH/ZWINT/BRIP1/CDK1/CHEK1/TTK/CDKN2A/NEK2/RAD51/E2F8/BLM/CCNB1/SPC25/RBL1/CDC6/NUF2/NDC80/E2F7/EZH2/DONSON/CENPF/WDR76/CDK2/BUB1B/TRIP13/FBXO5/BRCA1/CLSPN/BUB3/SUV39H1/CDC45/FANCD2/BUB1/CCP110/BIRC5/MAD2L1/BARD1/RB1/E2F1/CDCA8/CASP2/BRCA2/TIMELESS/CCNF/SPC24/CDC20/WEE1/AURKB/RPA2/CCND1/ATR/CRADD/RAD21/ZW10/SOX2/PRKDC/FOXN3/ESPL1/MSH2/PIDD1/CHEK2/ATM/XPC/BABAM1	66	1.62162
GO:0006302	BP	GO:0006302	double-strand break repair	57/605	307/18870	1.87E-27	3.93E-25	2.92E-25	MCM6/CDC7/MCM4/UHRF1/BRIP1/ESCO2/GINS2/RAD51AP1/CHEK1/DEK/RAD51/BLM/FEN1/RPA3/DCLRE1B/POLA1/CDCA5/TRIP13/RNF168/BRCA1/PARP1/MCM2/RAD51C/CDC45/RAD54L/HMGB2/FANCD2/POLQ/RPA1/FOXM1/PSMD14/BRCA2/MCM3/TIMELESS/MCM5/XRCC4/RPA2/SMC6/FANCB/TNKS1BP1/ATR/RAD21/MCM7/TOP3A/FANCM/PALB2/PRKDC/TDP1/MLH1/MSH2/ING3/XRCC6/CHEK2/ATM/NUCKS1/RAD52/BABAM1	57	1.85668
GO:1901991	BP	GO:1901991	negative regulation of mitotic cell cycle phase transition	46/605	196/18870	6.58E-27	1.32E-24	9.80E-25	DTL/ZWILCH/ZWINT/CDK1/CHEK1/TTK/BLM/CCNB1/SPC25/RBL1/CDC6/NUF2/NDC80/E2F7/EZH2/DONSON/CENPF/CDK2/BUB1B/TRIP13/FBXO5/BRCA1/CLSPN/BUB3/BUB1/BIRC5/MAD2L1/BARD1/RB1/CDCA8/CASP2/SPC24/CDC20/WEE1/AURKB/RPA2/CCND1/CRADD/RAD21/ZW10/PRKDC/FOXN3/PIDD1/CHEK2/ATM/BABAM1	46	2.34694
GO:0006310	BP	GO:0006310	DNA recombination	59/605	340/18870	9.10E-27	1.75E-24	1.30E-24	MCM6/CDC7/MCM4/UHRF1/BRIP1/GINS2/RAD51AP1/CHEK1/RAD51/BLM/EXO1/FEN1/RPA3/TOP2A/TRIP13/RNF168/BRCA1/PARP1/MCM2/RAD51C/CDC45/RAD54L/HMGB2/PSMC3IP/FANCD2/POLQ/RPA1/KPNA2/BARD1/PSMD14/BRCA2/MCM3/TIMELESS/MCM5/XRCC4/MND1/RPA2/SMC6/FANCB/HMGB3/RAD21/PIF1/MCM7/SUPV3L1/TOP3A/FANCM/PALB2/PRKDC/MLH1/MSH2/ING3/PAXIP1/LEF1/XRCC6/ATM/NUCKS1/IL7R/PTPRC/RAD52	59	1.73529
GO:0051783	BP	GO:0051783	regulation of nuclear division	40/605	146/18870	2.59E-26	4.71E-24	3.50E-24	NUSAP1/ZWILCH/ZWINT/RAD51AP1/CDCA2/CHEK1/MKI67/DLGAP5/TTK/AURKA/NEK2/CCNB1/SPC25/BORA/NUF2/NDC80/CENPF/CDC25C/KIF20B/BUB1B/TRIP13/FBXO5/BUB3/BUB1/UBE2C/BIRC5/MAD2L1/RB1/CDCA8/SPC24/CDC20/AURKB/EREG/RAD21/TGFA/IL1A/ZW10/ESPL1/EDN3/ATM	40	2.73973
GO:0007051	BP	GO:0007051	spindle organization	46/605	202/18870	2.65E-26	4.71E-24	3.50E-24	STIL/RACGAP1/DLGAP5/TTK/AURKA/NEK2/KIF23/CCNB1/SPC25/CCNB2/KIF11/BORA/STMN1/ASPM/SPAG5/PRC1/NUF2/MYBL2/NDC80/KIF4A/FBXO5/SMC1A/CENPE/TACC3/CENPJ/BIRC5/STAG1/KIFC1/CDCA8/RAE1/MZT1/PSRC1/CDC20/TPX2/GPSM2/AURKB/CKAP5/KIF2A/ESPL1/MLH1/TUBB/RAN/CHEK2/TUBG1/SAC3D1/SMC3	46	2.27723
GO:0007052	BP	GO:0007052	mitotic spindle organization	38/605	130/18870	3.42E-26	5.84E-24	4.34E-24	STIL/RACGAP1/DLGAP5/TTK/AURKA/NEK2/KIF23/CCNB1/SPC25/KIF11/BORA/STMN1/PRC1/NUF2/MYBL2/NDC80/KIF4A/SMC1A/CENPE/TACC3/CENPJ/BIRC5/STAG1/KIFC1/CDCA8/RAE1/MZT1/PSRC1/CDC20/TPX2/GPSM2/AURKB/CKAP5/KIF2A/RAN/CHEK2/TUBG1/SMC3	38	2.92308
GO:0045930	BP	GO:0045930	negative regulation of mitotic cell cycle	50/605	248/18870	6.69E-26	1.10E-23	8.19E-24	DTL/TIPIN/ZWILCH/ZWINT/CDK1/CHEK1/TTK/BLM/CCNB1/SPC25/RBL1/CDC6/NUF2/NDC80/E2F7/EZH2/DONSON/CENPF/CDK2/BUB1B/TRIP13/FBXO5/BRCA1/CLSPN/BUB3/FANCD2/BUB1/BIRC5/MAD2L1/BARD1/RB1/CDCA8/CASP2/SPC24/CDC20/WEE1/AURKB/RPA2/CCND1/CRADD/RAD21/ZW10/PRKDC/FOXN3/MSH2/PIDD1/CHEK2/ATM/XPC/BABAM1	50	2.01613
GO:0051983	BP	GO:0051983	regulation of chromosome segregation	36/605	131/18870	7.57E-24	1.20E-21	8.94E-22	ZWILCH/ZWINT/CDK1/CDCA2/MKI67/DLGAP5/TTK/CCNB1/SPC25/SMC2/CDC6/NUF2/NDC80/KIF2C/CENPF/BUB1B/TRIP13/FBXO5/BUB3/SMC4/CENPE/BUB1/TACC3/UBE2C/BIRC5/MAD2L1/RB1/CDCA8/SPC24/CDC20/AURKB/SMC6/RAD21/ZW10/ESPL1/ATM	36	2.74809
GO:0010965	BP	GO:0010965	regulation of mitotic sister chromatid separation	26/605	59/18870	1.24E-23	1.91E-21	1.42E-21	ZWILCH/ZWINT/DLGAP5/TTK/CCNB1/SPC25/NUF2/NDC80/CENPF/BUB1B/TRIP13/FBXO5/BUB3/BUB1/UBE2C/BIRC5/MAD2L1/RB1/CDCA8/SPC24/CDC20/AURKB/RAD21/ZW10/ESPL1/ATM	26	4.40678
GO:1905818	BP	GO:1905818	regulation of chromosome separation	28/605	74/18870	3.94E-23	5.87E-21	4.36E-21	ZWILCH/ZWINT/DLGAP5/TTK/CCNB1/SPC25/SMC2/NUF2/NDC80/CENPF/BUB1B/TRIP13/FBXO5/BUB3/SMC4/BUB1/UBE2C/BIRC5/MAD2L1/RB1/CDCA8/SPC24/CDC20/AURKB/RAD21/ZW10/ESPL1/ATM	28	3.78378
GO:0051304	BP	GO:0051304	chromosome separation	29/605	81/18870	4.16E-23	5.99E-21	4.45E-21	ZWILCH/ZWINT/DLGAP5/TTK/CCNB1/SPC25/SMC2/NUF2/NDC80/CENPF/BUB1B/TRIP13/FBXO5/BUB3/SMC4/BUB1/UBE2C/BIRC5/MAD2L1/RB1/CDCA8/SPC24/CDC20/AURKB/RAD21/TOP3A/ZW10/ESPL1/ATM	29	3.58025
GO:0051306	BP	GO:0051306	mitotic sister chromatid separation	26/605	62/18870	6.00E-23	8.39E-21	6.23E-21	ZWILCH/ZWINT/DLGAP5/TTK/CCNB1/SPC25/NUF2/NDC80/CENPF/BUB1B/TRIP13/FBXO5/BUB3/BUB1/UBE2C/BIRC5/MAD2L1/RB1/CDCA8/SPC24/CDC20/AURKB/RAD21/ZW10/ESPL1/ATM	26	4.19355
GO:0051321	BP	GO:0051321	meiotic cell cycle	49/605	287/18870	4.62E-22	6.27E-20	4.65E-20	BRIP1/RAD51AP1/CDC25A/CKS2/TTK/AURKA/NEK2/RAD51/EXO1/SMC2/CCNE2/CCNB2/ASPM/NUF2/NDC80/TOP2A/CDC25C/CDK2/TRIP13/FBXO5/BUB3/SMC4/RAD51C/SMC1A/RAD54L/PSMC3IP/FANCD2/RPA1/PTTG1/FANCA/CCNE1/BRCA2/PTTG3P/MND1/CDC20/BCL2L11/EREG/RAD21/TOP3A/FANCM/METTL3/ZW10/ESPL1/MLH1/CDC25B/TUBG1/ATM/SMC3/CCNA1	49	1.70732
GO:0044786	BP	GO:0044786	cell cycle DNA replication	22/605	44/18870	1.01E-21	1.33E-19	9.91E-20	MCM6/CDC7/MCM4/TIPIN/GINS1/DBF4/RAD51/E2F8/BLM/PCNA/FEN1/E2F7/POLA1/DONSON/TK1/FBXO5/MCM2/CDC45/GINS3/BRCA2/MCM3/LIG1	22	5
GO:0044839	BP	GO:0044839	cell cycle G2/M phase transition	36/605	155/18870	3.87E-21	4.96E-19	3.68E-19	DTL/CDC7/CDK1/CHEK1/CDC25A/AURKA/BLM/CCNB1/MELK/CCNB2/CCNA2/CDC6/NDC80/DONSON/CENPF/CDC25C/CDK2/FBXO5/BRCA1/CLSPN/KIF14/RRM1/RAD51C/FOXM1/BARD1/WEE1/AURKB/CCND1/RAD21/FOXN3/CDC25B/PAXIP1/CDK4/CHEK2/ATM/BABAM1	36	2.32258
GO:0007091	BP	GO:0007091	metaphase/anaphase transition of mitotic cell cycle	29/605	94/18870	5.16E-21	6.44E-19	4.78E-19	ZWILCH/ZWINT/DLGAP5/TTK/CCNB1/SPC25/CDC6/NUF2/NDC80/CENPF/BUB1B/TRIP13/FBXO5/BUB3/CENPE/BUB1/TACC3/UBE2C/BIRC5/MAD2L1/RB1/CDCA8/SPC24/CDC20/AURKB/RAD21/ZW10/ESPL1/ATM	29	3.08511
GO:0033045	BP	GO:0033045	regulation of sister chromatid segregation	30/605	104/18870	9.49E-21	1.15E-18	8.56E-19	ZWILCH/ZWINT/CDK1/DLGAP5/TTK/CCNB1/SPC25/CDC6/NUF2/NDC80/CENPF/BUB1B/TRIP13/FBXO5/BUB3/CENPE/BUB1/TACC3/UBE2C/BIRC5/MAD2L1/RB1/CDCA8/SPC24/CDC20/AURKB/RAD21/ZW10/ESPL1/ATM	30	2.88462
GO:0033046	BP	GO:0033046	negative regulation of sister chromatid segregation	22/605	48/18870	1.17E-20	1.28E-18	9.53E-19	ZWILCH/ZWINT/TTK/CCNB1/SPC25/NUF2/NDC80/CENPF/BUB1B/TRIP13/FBXO5/BUB3/BUB1/BIRC5/MAD2L1/CDCA8/SPC24/CDC20/AURKB/RAD21/ZW10/ATM	22	4.58333
GO:0033048	BP	GO:0033048	negative regulation of mitotic sister chromatid segregation	22/605	48/18870	1.17E-20	1.28E-18	9.53E-19	ZWILCH/ZWINT/TTK/CCNB1/SPC25/NUF2/NDC80/CENPF/BUB1B/TRIP13/FBXO5/BUB3/BUB1/BIRC5/MAD2L1/CDCA8/SPC24/CDC20/AURKB/RAD21/ZW10/ATM	22	4.58333
GO:0045841	BP	GO:0045841	negative regulation of mitotic metaphase/anaphase transition	22/605	48/18870	1.17E-20	1.28E-18	9.53E-19	ZWILCH/ZWINT/TTK/CCNB1/SPC25/NUF2/NDC80/CENPF/BUB1B/TRIP13/FBXO5/BUB3/BUB1/BIRC5/MAD2L1/CDCA8/SPC24/CDC20/AURKB/RAD21/ZW10/ATM	22	4.58333
GO:2000816	BP	GO:2000816	negative regulation of mitotic sister chromatid separation	22/605	48/18870	1.17E-20	1.28E-18	9.53E-19	ZWILCH/ZWINT/TTK/CCNB1/SPC25/NUF2/NDC80/CENPF/BUB1B/TRIP13/FBXO5/BUB3/BUB1/BIRC5/MAD2L1/CDCA8/SPC24/CDC20/AURKB/RAD21/ZW10/ATM	22	4.58333
GO:0033047	BP	GO:0033047	regulation of mitotic sister chromatid segregation	23/605	54/18870	1.23E-20	1.32E-18	9.82E-19	ZWILCH/ZWINT/CDK1/TTK/CCNB1/SPC25/NUF2/NDC80/CENPF/BUB1B/TRIP13/FBXO5/BUB3/BUB1/BIRC5/MAD2L1/CDCA8/SPC24/CDC20/AURKB/RAD21/ZW10/ATM	23	4.25926
GO:0044784	BP	GO:0044784	metaphase/anaphase transition of cell cycle	29/605	97/18870	1.39E-20	1.46E-18	1.08E-18	ZWILCH/ZWINT/DLGAP5/TTK/CCNB1/SPC25/CDC6/NUF2/NDC80/CENPF/BUB1B/TRIP13/FBXO5/BUB3/CENPE/BUB1/TACC3/UBE2C/BIRC5/MAD2L1/RB1/CDCA8/SPC24/CDC20/AURKB/RAD21/ZW10/ESPL1/ATM	29	2.98969
GO:0030071	BP	GO:0030071	regulation of mitotic metaphase/anaphase transition	28/605	90/18870	1.91E-20	1.96E-18	1.46E-18	ZWILCH/ZWINT/DLGAP5/TTK/CCNB1/SPC25/CDC6/NUF2/NDC80/CENPF/BUB1B/TRIP13/FBXO5/BUB3/CENPE/BUB1/UBE2C/BIRC5/MAD2L1/RB1/CDCA8/SPC24/CDC20/AURKB/RAD21/ZW10/ESPL1/ATM	28	3.11111
GO:0045839	BP	GO:0045839	negative regulation of mitotic nuclear division	23/605	56/18870	3.39E-20	3.36E-18	2.49E-18	ZWILCH/ZWINT/CHEK1/TTK/CCNB1/SPC25/NUF2/NDC80/CENPF/BUB1B/TRIP13/FBXO5/BUB3/BUB1/BIRC5/MAD2L1/CDCA8/SPC24/CDC20/AURKB/RAD21/ZW10/ATM	23	4.10714
GO:0051985	BP	GO:0051985	negative regulation of chromosome segregation	22/605	50/18870	3.57E-20	3.36E-18	2.49E-18	ZWILCH/ZWINT/TTK/CCNB1/SPC25/NUF2/NDC80/CENPF/BUB1B/TRIP13/FBXO5/BUB3/BUB1/BIRC5/MAD2L1/CDCA8/SPC24/CDC20/AURKB/RAD21/ZW10/ATM	22	4.4
GO:1902100	BP	GO:1902100	negative regulation of metaphase/anaphase transition of cell cycle	22/605	50/18870	3.57E-20	3.36E-18	2.49E-18	ZWILCH/ZWINT/TTK/CCNB1/SPC25/NUF2/NDC80/CENPF/BUB1B/TRIP13/FBXO5/BUB3/BUB1/BIRC5/MAD2L1/CDCA8/SPC24/CDC20/AURKB/RAD21/ZW10/ATM	22	4.4
GO:1905819	BP	GO:1905819	negative regulation of chromosome separation	22/605	50/18870	3.57E-20	3.36E-18	2.49E-18	ZWILCH/ZWINT/TTK/CCNB1/SPC25/NUF2/NDC80/CENPF/BUB1B/TRIP13/FBXO5/BUB3/BUB1/BIRC5/MAD2L1/CDCA8/SPC24/CDC20/AURKB/RAD21/ZW10/ATM	22	4.4
GO:0071103	BP	GO:0071103	DNA conformation change	28/605	92/18870	3.74E-20	3.45E-18	2.56E-18	MCM6/MCM4/RFC3/BRIP1/GINS2/GINS1/RAD51/BLM/DSCC1/TOP2A/MCM2/CDC45/RFC4/HMGB2/POLQ/GINS3/G3BP1/MCM3/MCM5/HMGB3/PIF1/MCM7/SUPV3L1/TOP3A/FANCM/MNAT1/XRCC6/RFC2	28	3.04348
GO:0032392	BP	GO:0032392	DNA geometric change	27/605	85/18870	5.00E-20	4.52E-18	3.36E-18	MCM6/MCM4/RFC3/BRIP1/GINS2/GINS1/RAD51/BLM/DSCC1/TOP2A/MCM2/CDC45/RFC4/HMGB2/POLQ/GINS3/G3BP1/MCM3/MCM5/HMGB3/PIF1/MCM7/SUPV3L1/FANCM/MNAT1/XRCC6/RFC2	27	3.17647
GO:1902099	BP	GO:1902099	regulation of metaphase/anaphase transition of cell cycle	28/605	93/18870	5.20E-20	4.61E-18	3.42E-18	ZWILCH/ZWINT/DLGAP5/TTK/CCNB1/SPC25/CDC6/NUF2/NDC80/CENPF/BUB1B/TRIP13/FBXO5/BUB3/CENPE/BUB1/UBE2C/BIRC5/MAD2L1/RB1/CDCA8/SPC24/CDC20/AURKB/RAD21/ZW10/ESPL1/ATM	28	3.01075
GO:0010212	BP	GO:0010212	response to ionizing radiation	33/605	138/18870	6.68E-20	5.82E-18	4.32E-18	RAD51AP1/RAD51/BLM/ECT2/RNF168/BRCA1/PARP1/RRM1/RAD54L/FANCD2/IFI16/BARD1/BRCA2/XRCC4/BAX/EGR1/TNKS1BP1/ATR/IL1A/PRKDC/MSH2/PAXIP1/XRCC6/CRYAB/CHEK2/CXCL10/ATM/DNMT3A/NUCKS1/MYC/CCND2/PTPRC/BABAM1	33	2.3913
GO:0000725	BP	GO:0000725	recombinational repair	37/605	179/18870	7.68E-20	6.56E-18	4.87E-18	MCM6/CDC7/MCM4/UHRF1/GINS2/RAD51AP1/CHEK1/RAD51/BLM/FEN1/RPA3/BRCA1/PARP1/MCM2/RAD51C/CDC45/RAD54L/POLQ/RPA1/PSMD14/BRCA2/MCM3/TIMELESS/MCM5/RPA2/SMC6/FANCB/RAD21/MCM7/TOP3A/FANCM/PALB2/ING3/XRCC6/ATM/NUCKS1/RAD52	37	2.06704
GO:0033044	BP	GO:0033044	regulation of chromosome organization	43/605	247/18870	7.92E-20	6.65E-18	4.94E-18	ZWILCH/ZWINT/CDK1/DLGAP5/TTK/NEK2/CCNB1/SPC25/SMC2/CDC6/NUF2/FEN1/NDC80/CENPF/TOP2A/CDK2/BUB1B/TRIP13/FBXO5/BUB3/SMC4/PARP1/CENPE/BUB1/TACC3/UBE2C/BIRC5/MAD2L1/RB1/CDCA8/SPC24/CDC20/AURKB/SMC6/ATR/RAD21/PIF1/ZW10/MNAT1/ESPL1/ATM/AXIN2/MYC	43	1.74089
GO:0000086	BP	GO:0000086	G2/M transition of mitotic cell cycle	33/605	140/18870	1.08E-19	8.89E-18	6.61E-18	DTL/CDC7/CDK1/CHEK1/CDC25A/AURKA/BLM/CCNB1/MELK/CCNA2/CDC6/DONSON/CENPF/CDC25C/CDK2/FBXO5/BRCA1/CLSPN/KIF14/RRM1/RAD51C/FOXM1/BARD1/WEE1/AURKB/CCND1/RAD21/FOXN3/CDC25B/CDK4/CHEK2/ATM/BABAM1	33	2.35714
GO:0006275	BP	GO:0006275	regulation of DNA replication	31/605	124/18870	2.21E-19	1.79E-17	1.33E-17	MCM6/CDC7/MCM4/RFC3/TIPIN/ESCO2/CDK1/DBF4/E2F8/BLM/DSCC1/PCNA/CCNA2/CDC6/E2F7/CDK2/FBXO5/MCM2/ORC5/RFC4/MCM3/TIMELESS/MCM5/EREG/ATR/MCM7/CCDC88A/NUCKS1/SMC3/RFC2/ID3	31	2.5
GO:0000724	BP	GO:0000724	double-strand break repair via homologous recombination	36/605	175/18870	2.89E-19	2.30E-17	1.71E-17	MCM6/CDC7/MCM4/UHRF1/GINS2/RAD51AP1/CHEK1/RAD51/BLM/FEN1/RPA3/BRCA1/PARP1/MCM2/RAD51C/CDC45/RAD54L/POLQ/RPA1/PSMD14/BRCA2/MCM3/TIMELESS/MCM5/RPA2/SMC6/FANCB/RAD21/MCM7/TOP3A/FANCM/PALB2/ING3/ATM/NUCKS1/RAD52	36	2.05714
GO:0050000	BP	GO:0050000	chromosome localization	30/605	116/18870	2.98E-19	2.33E-17	1.73E-17	ZWILCH/RACGAP1/DLGAP5/NEK2/CCNB1/SPC25/SPAG5/NUF2/NDC80/KIF2C/CDCA5/CENPF/ECT2/BUB3/KIF14/CENPE/BIRC5/KIFC1/RB1/CDCA8/DSN1/SPC24/PSRC1/AURKB/NUP98/FAM83D/KIF22/ZW10/MLH1/ATM	30	2.58621
GO:0031570	BP	GO:0031570	DNA integrity checkpoint signaling	32/605	135/18870	3.26E-19	2.51E-17	1.86E-17	DTL/TIPIN/BRIP1/CDK1/CHEK1/RAD51/BLM/CDC6/DONSON/WDR76/CDK2/BRCA1/CLSPN/CDC45/FANCD2/BARD1/E2F1/CASP2/BRCA2/TIMELESS/RPA2/CCND1/ATR/CRADD/PRKDC/FOXN3/MSH2/PIDD1/CHEK2/ATM/XPC/BABAM1	32	2.37037
GO:0051784	BP	GO:0051784	negative regulation of nuclear division	23/605	63/18870	8.14E-19	6.10E-17	4.53E-17	ZWILCH/ZWINT/CHEK1/TTK/CCNB1/SPC25/NUF2/NDC80/CENPF/BUB1B/TRIP13/FBXO5/BUB3/BUB1/BIRC5/MAD2L1/CDCA8/SPC24/CDC20/AURKB/RAD21/ZW10/ATM	23	3.65079
GO:1903046	BP	GO:1903046	meiotic cell cycle process	39/605	214/18870	8.20E-19	6.10E-17	4.53E-17	BRIP1/RAD51AP1/CDC25A/CKS2/TTK/AURKA/RAD51/SMC2/CCNE2/CCNB2/ASPM/NUF2/NDC80/TOP2A/CDC25C/TRIP13/FBXO5/SMC4/RAD51C/RAD54L/PSMC3IP/FANCD2/PTTG1/FANCA/CCNE1/BRCA2/PTTG3P/MND1/CDC20/BCL2L11/EREG/RAD21/FANCM/ESPL1/MLH1/CDC25B/TUBG1/ATM/CCNA1	39	1.82243
GO:2001251	BP	GO:2001251	negative regulation of chromosome organization	27/605	94/18870	9.49E-19	6.95E-17	5.16E-17	ZWILCH/ZWINT/TTK/CCNB1/SPC25/NUF2/NDC80/CENPF/TOP2A/BUB1B/TRIP13/FBXO5/BUB3/PARP1/BUB1/BIRC5/MAD2L1/CDCA8/SPC24/CDC20/AURKB/RAD21/PIF1/ZW10/MNAT1/ESPL1/ATM	27	2.87234
GO:0000082	BP	GO:0000082	G1/S transition of mitotic cell cycle	42/605	252/18870	1.16E-18	8.34E-17	6.20E-17	CDC7/CDK1/STIL/CDC25A/DBF4/CDKN2A/CCNE2/RBL1/RRM2/CCNA2/CDC6/CDKN3/E2F7/EZH2/CDK2/KIF14/RRM1/CDKN2C/CENPJ/RB1/E2F1/CASP2/BID/E2F2/CCNE1/WEE1/RPA2/CCND1/CRADD/POLE/PRKDC/TFDP1/MNAT1/PIDD1/E2F3/CDK4/CHEK2/ATM/MYC/CCND2/ID4/ID2	42	1.66667
GO:0032508	BP	GO:0032508	DNA duplex unwinding	25/605	79/18870	1.35E-18	9.60E-17	7.13E-17	MCM6/MCM4/RFC3/BRIP1/GINS2/GINS1/RAD51/BLM/DSCC1/TOP2A/MCM2/CDC45/RFC4/POLQ/GINS3/G3BP1/MCM3/MCM5/PIF1/MCM7/SUPV3L1/FANCM/MNAT1/XRCC6/RFC2	25	3.16456
GO:0010389	BP	GO:0010389	regulation of G2/M transition of mitotic cell cycle	28/605	104/18870	1.45E-18	1.02E-16	7.55E-17	DTL/CDC7/CDK1/CHEK1/CDC25A/AURKA/BLM/CCNB1/CDC6/DONSON/CENPF/CDC25C/CDK2/FBXO5/BRCA1/CLSPN/KIF14/RRM1/RAD51C/BARD1/AURKB/CCND1/RAD21/FOXN3/CDC25B/CDK4/ATM/BABAM1	28	2.69231
GO:0044843	BP	GO:0044843	cell cycle G1/S phase transition	44/605	279/18870	1.53E-18	1.05E-16	7.82E-17	CDC7/CDK1/STIL/CDC25A/DBF4/CDKN2A/CCNE2/RBL1/RRM2/CCNA2/CDC6/CDKN3/E2F7/EZH2/CDK2/KIF14/RRM1/CDKN2C/CENPJ/RB1/E2F1/CASP2/BID/E2F2/CCNE1/WEE1/RPA2/CCND1/CRADD/POLE/FAM83D/SOX2/PRKDC/TFDP1/MNAT1/PIDD1/E2F3/CDK4/CHEK2/ATM/MYC/CCND2/ID4/ID2	44	1.57706
GO:0051310	BP	GO:0051310	metaphase chromosome alignment	27/605	96/18870	1.74E-18	1.18E-16	8.75E-17	ZWILCH/RACGAP1/NEK2/CCNB1/SPC25/SPAG5/NUF2/NDC80/KIF2C/CDCA5/CENPF/ECT2/BUB3/KIF14/CENPE/BIRC5/KIFC1/RB1/CDCA8/DSN1/SPC24/PSRC1/AURKB/FAM83D/KIF22/ZW10/MLH1	27	2.8125
GO:0051225	BP	GO:0051225	spindle assembly	31/605	133/18870	2.01E-18	1.34E-16	9.96E-17	STIL/RACGAP1/AURKA/NEK2/KIF23/CCNB2/KIF11/ASPM/SPAG5/PRC1/MYBL2/NDC80/KIF4A/FBXO5/SMC1A/CENPJ/BIRC5/STAG1/KIFC1/CDCA8/MZT1/CDC20/TPX2/GPSM2/AURKB/KIF2A/MLH1/TUBB/CHEK2/SAC3D1/SMC3	31	2.33083
GO:0033260	BP	GO:0033260	nuclear DNA replication	19/605	40/18870	2.18E-18	1.44E-16	1.07E-16	MCM6/CDC7/MCM4/TIPIN/GINS1/DBF4/RAD51/BLM/PCNA/FEN1/POLA1/DONSON/TK1/MCM2/CDC45/GINS3/BRCA2/MCM3/LIG1	19	4.75
GO:0007094	BP	GO:0007094	mitotic spindle assembly checkpoint signaling	20/605	46/18870	2.49E-18	1.57E-16	1.17E-16	ZWILCH/ZWINT/TTK/CCNB1/SPC25/NUF2/NDC80/CENPF/BUB1B/TRIP13/BUB3/BUB1/BIRC5/MAD2L1/CDCA8/SPC24/CDC20/AURKB/ZW10/ATM	20	4.34783
GO:0071173	BP	GO:0071173	spindle assembly checkpoint signaling	20/605	46/18870	2.49E-18	1.57E-16	1.17E-16	ZWILCH/ZWINT/TTK/CCNB1/SPC25/NUF2/NDC80/CENPF/BUB1B/TRIP13/BUB3/BUB1/BIRC5/MAD2L1/CDCA8/SPC24/CDC20/AURKB/ZW10/ATM	20	4.34783
GO:0071174	BP	GO:0071174	mitotic spindle checkpoint signaling	20/605	46/18870	2.49E-18	1.57E-16	1.17E-16	ZWILCH/ZWINT/TTK/CCNB1/SPC25/NUF2/NDC80/CENPF/BUB1B/TRIP13/BUB3/BUB1/BIRC5/MAD2L1/CDCA8/SPC24/CDC20/AURKB/ZW10/ATM	20	4.34783
GO:1902749	BP	GO:1902749	regulation of cell cycle G2/M phase transition	29/605	116/18870	3.26E-18	2.03E-16	1.51E-16	DTL/CDC7/CDK1/CHEK1/CDC25A/AURKA/BLM/CCNB1/CDC6/DONSON/CENPF/CDC25C/CDK2/FBXO5/BRCA1/CLSPN/KIF14/RRM1/RAD51C/BARD1/AURKB/CCND1/RAD21/FOXN3/CDC25B/PAXIP1/CDK4/ATM/BABAM1	29	2.5
GO:0061982	BP	GO:0061982	meiosis I cell cycle process	31/605	136/18870	4.01E-18	2.47E-16	1.83E-16	BRIP1/RAD51AP1/CDC25A/CKS2/AURKA/RAD51/CCNE2/CCNB2/NDC80/TOP2A/CDC25C/TRIP13/FBXO5/RAD51C/RAD54L/PSMC3IP/FANCD2/PTTG1/CCNE1/BRCA2/PTTG3P/MND1/CDC20/BCL2L11/RAD21/FANCM/ESPL1/MLH1/CDC25B/ATM/CCNA1	31	2.27941
GO:0031577	BP	GO:0031577	spindle checkpoint signaling	20/605	47/18870	4.21E-18	2.52E-16	1.87E-16	ZWILCH/ZWINT/TTK/CCNB1/SPC25/NUF2/NDC80/CENPF/BUB1B/TRIP13/BUB3/BUB1/BIRC5/MAD2L1/CDCA8/SPC24/CDC20/AURKB/ZW10/ATM	20	4.25532
GO:0090329	BP	GO:0090329	regulation of DNA-templated DNA replication	20/605	47/18870	4.21E-18	2.52E-16	1.87E-16	MCM6/CDC7/MCM4/RFC3/TIPIN/DBF4/E2F8/BLM/DSCC1/PCNA/E2F7/CDK2/FBXO5/MCM2/RFC4/MCM3/TIMELESS/MCM5/MCM7/RFC2	20	4.25532
GO:0051303	BP	GO:0051303	establishment of chromosome localization	28/605	108/18870	4.37E-18	2.58E-16	1.92E-16	ZWILCH/RACGAP1/NEK2/CCNB1/SPC25/SPAG5/NUF2/NDC80/KIF2C/CDCA5/CENPF/ECT2/BUB3/KIF14/CENPE/BIRC5/KIFC1/RB1/CDCA8/DSN1/SPC24/PSRC1/AURKB/FAM83D/KIF22/ZW10/MLH1/ATM	28	2.59259
GO:0009314	BP	GO:0009314	response to radiation	54/605	428/18870	5.49E-18	3.21E-16	2.38E-16	DTL/TIPIN/RAD51AP1/CDC25A/RAD51/BLM/PCNA/USP1/FEN1/ECT2/RNF168/BRCA1/PARP1/RRM1/SMC1A/RAD54L/FANCD2/IFI16/FANCG/BARD1/BRCA2/XRCC4/BAX/EIF2S1/AURKB/CCND1/EGR1/PBK/TNKS1BP1/ATR/POLD3/MMP9/METTL3/IL1A/PRKDC/MSH2/BMF/PAXIP1/XRCC6/CRYAB/CHEK2/CXCL10/ATM/DNMT3A/POLD1/NUCKS1/MYC/CCND2/PTPRC/XPC/BABAM1/ID2/SLC1A2/PIK3R1	54	1.26168
GO:0006270	BP	GO:0006270	DNA replication initiation	18/605	37/18870	1.00E-17	5.72E-16	4.25E-16	MCM6/MCM4/PRIM2/PRIM1/CCNE2/CDC6/POLA1/CDK2/ORC6/MCM2/CDC45/ORC5/GINS3/CCNE1/MCM3/MCM5/POLA2/MCM7	18	4.86486
GO:0140013	BP	GO:0140013	meiotic nuclear division	36/605	194/18870	1.00E-17	5.72E-16	4.25E-16	BRIP1/RAD51AP1/CKS2/TTK/AURKA/RAD51/SMC2/CCNE2/CCNB2/ASPM/NUF2/NDC80/TOP2A/TRIP13/FBXO5/SMC4/RAD51C/RAD54L/PSMC3IP/FANCD2/PTTG1/FANCA/CCNE1/BRCA2/PTTG3P/MND1/CDC20/BCL2L11/EREG/RAD21/FANCM/ESPL1/MLH1/CDC25B/ATM/CCNA1	36	1.85567
GO:0042770	BP	GO:0042770	signal transduction in response to DNA damage	35/605	189/18870	3.09E-17	1.74E-15	1.29E-15	DTL/TIPIN/BRIP1/CDK1/CHEK1/RAD51/BLM/E2F7/DONSON/WDR76/CDK2/BRCA1/CLSPN/FANCD2/FOXM1/BARD1/E2F1/CASP2/BID/BRCA2/RPA2/CCND1/ATR/CRADD/HIPK2/PRKDC/FOXN3/MSH2/PIDD1/PAXIP1/CHEK2/ATM/XPC/BABAM1/PMAIP1	35	1.85185
GO:0000077	BP	GO:0000077	DNA damage checkpoint signaling	29/605	126/18870	3.69E-17	2.05E-15	1.52E-15	DTL/TIPIN/BRIP1/CDK1/CHEK1/RAD51/BLM/DONSON/WDR76/CDK2/BRCA1/CLSPN/FANCD2/BARD1/E2F1/CASP2/BRCA2/RPA2/CCND1/ATR/CRADD/PRKDC/FOXN3/MSH2/PIDD1/CHEK2/ATM/XPC/BABAM1	29	2.30159
GO:0008608	BP	GO:0008608	attachment of spindle microtubules to kinetochore	19/605	49/18870	2.39E-16	1.31E-14	9.75E-15	ZWILCH/RACGAP1/NEK2/CCNB1/SPC25/SPAG5/NUF2/NDC80/KIF2C/ECT2/BUB3/CENPE/BIRC5/RB1/CDCA8/DSN1/SPC24/AURKB/ZW10	19	3.87755
GO:0045931	BP	GO:0045931	positive regulation of mitotic cell cycle	28/605	128/18870	5.35E-16	2.90E-14	2.16E-14	DTL/CDC7/CDK1/STIL/CDC25A/DLGAP5/AURKA/CCNB1/RRM2/CDC6/CDCA5/CDC25C/FBXO5/RRM1/RAD51C/UBE2C/CENPJ/RB1/BRCA2/FOXA1/CDC20/CCND1/TFDP1/PRKCA/ESPL1/CDC25B/CDK4/CCND2	28	2.1875
GO:0007127	BP	GO:0007127	meiosis I	28/605	129/18870	6.63E-16	3.56E-14	2.64E-14	BRIP1/RAD51AP1/CKS2/AURKA/RAD51/CCNE2/CCNB2/NDC80/TOP2A/TRIP13/FBXO5/RAD51C/RAD54L/PSMC3IP/FANCD2/PTTG1/CCNE1/BRCA2/PTTG3P/MND1/BCL2L11/RAD21/FANCM/ESPL1/MLH1/CDC25B/ATM/CCNA1	28	2.17054
GO:0140694	BP	GO:0140694	non-membrane-bounded organelle assembly	49/605	408/18870	1.49E-15	7.82E-14	5.81E-14	STIL/RACGAP1/DLGAP5/AURKA/NEK2/KIF23/CCNB2/KIF11/PLK4/ANLN/ASPM/SPAG5/PRC1/MYBL2/NDC80/CENPF/KIF4A/CDK2/FBXO5/BRCA1/SMC1A/CENPE/CENPW/CCP110/CENPJ/BIRC5/CENPA/STAG1/KIFC1/CDCA8/G3BP1/CNOT7/MZT1/CDC20/TPX2/GPSM2/EIF2S1/AURKB/PRKDC/KIF2A/MLH1/MYH11/TUBB/RNF213/CHEK2/SAC3D1/SMC3/CNOT6L/SQLE	49	1.20098
GO:0071214	BP	GO:0071214	cellular response to abiotic stimulus	44/605	334/18870	1.51E-15	7.82E-14	5.81E-14	RAD51AP1/CHEK1/CDC25A/RAD51/BLM/PCNA/ECT2/BRCA1/PARP1/IFI16/BARD1/CASP2/AKR1B1/BRCA2/BAX/EIF2S1/CASP8/AURKB/EGR1/PBK/TNKS1BP1/ATR/POLD3/CRADD/MMP9/METTL3/TLR4/CASP8AP2/BNIP3/SLC2A1/BMF/GCLC/XRCC6/CRYAB/CHEK2/ATM/ENG/POLD1/NUCKS1/MYC/CCND2/GPLD1/XPC/PIK3R1	44	1.31737
GO:0104004	BP	GO:0104004	cellular response to environmental stimulus	44/605	334/18870	1.51E-15	7.82E-14	5.81E-14	RAD51AP1/CHEK1/CDC25A/RAD51/BLM/PCNA/ECT2/BRCA1/PARP1/IFI16/BARD1/CASP2/AKR1B1/BRCA2/BAX/EIF2S1/CASP8/AURKB/EGR1/PBK/TNKS1BP1/ATR/POLD3/CRADD/MMP9/METTL3/TLR4/CASP8AP2/BNIP3/SLC2A1/BMF/GCLC/XRCC6/CRYAB/CHEK2/ATM/ENG/POLD1/NUCKS1/MYC/CCND2/GPLD1/XPC/PIK3R1	44	1.31737
GO:1902969	BP	GO:1902969	mitotic DNA replication	12/605	16/18870	1.72E-15	8.79E-14	6.53E-14	MCM6/MCM4/GINS1/RAD51/POLA1/TK1/MCM2/CDC45/GINS3/BRCA2/MCM3/LIG1	12	7.5
GO:0044774	BP	GO:0044774	mitotic DNA integrity checkpoint signaling	23/605	87/18870	2.71E-15	1.37E-13	1.02E-13	DTL/TIPIN/CDK1/CHEK1/BLM/CDC6/DONSON/CDK2/BRCA1/CLSPN/FANCD2/CASP2/RPA2/CCND1/CRADD/PRKDC/FOXN3/MSH2/PIDD1/CHEK2/ATM/XPC/BABAM1	23	2.64368
GO:0071478	BP	GO:0071478	cellular response to radiation	32/605	181/18870	2.88E-15	1.45E-13	1.07E-13	RAD51AP1/CDC25A/RAD51/BLM/PCNA/ECT2/BRCA1/PARP1/IFI16/BARD1/BRCA2/BAX/EIF2S1/AURKB/EGR1/PBK/TNKS1BP1/ATR/POLD3/MMP9/METTL3/BMF/XRCC6/CRYAB/CHEK2/ATM/POLD1/NUCKS1/MYC/CCND2/XPC/PIK3R1	32	1.76796
GO:1901992	BP	GO:1901992	positive regulation of mitotic cell cycle phase transition	24/605	98/18870	4.42E-15	2.19E-13	1.63E-13	DTL/CDC7/CDK1/STIL/CDC25A/DLGAP5/CCNB1/RRM2/CDC6/CDCA5/CDC25C/FBXO5/RRM1/RAD51C/UBE2C/CENPJ/RB1/CDC20/CCND1/TFDP1/ESPL1/CDC25B/CDK4/CCND2	24	2.44898
GO:1901989	BP	GO:1901989	positive regulation of cell cycle phase transition	26/605	119/18870	6.17E-15	3.03E-13	2.25E-13	DTL/CDC7/CDK1/STIL/CDC25A/DLGAP5/CCNB1/RRM2/CDC6/EZH2/CDCA5/CDC25C/FBXO5/RRM1/RAD51C/UBE2C/CENPJ/RB1/CDC20/CCND1/FAM83D/TFDP1/ESPL1/CDC25B/CDK4/CCND2	26	2.18487
GO:0044773	BP	GO:0044773	mitotic DNA damage checkpoint signaling	22/605	83/18870	1.03E-14	5.01E-13	3.72E-13	DTL/TIPIN/CDK1/CHEK1/BLM/DONSON/CDK2/BRCA1/CLSPN/FANCD2/CASP2/RPA2/CCND1/CRADD/PRKDC/FOXN3/MSH2/PIDD1/CHEK2/ATM/XPC/BABAM1	22	2.6506
GO:0006271	BP	GO:0006271	DNA strand elongation involved in DNA replication	11/605	15/18870	4.09E-14	1.96E-12	1.46E-12	MCM4/RFC3/GINS1/PCNA/POLA1/RFC4/MCM3/LIG1/POLD3/MCM7/POLE	11	7.33333
GO:0071897	BP	GO:0071897	DNA biosynthetic process	31/605	194/18870	1.38E-13	6.55E-12	4.86E-12	DTL/RFC3/POLE2/CHEK1/NEK2/DSCC1/PCNA/USP1/CCNA2/POLA1/CENPF/TK1/RRM1/RFC4/TYMS/POLQ/RPA1/AURKB/TNKS1BP1/LIG1/ATR/POLD3/PIF1/POLE/TFDP1/POLE4/LOX/ATM/POLD1/MYC/RFC2	31	1.59794
GO:0006268	BP	GO:0006268	DNA unwinding involved in DNA replication	12/605	21/18870	2.39E-13	1.13E-11	8.36E-12	MCM6/MCM4/GINS2/GINS1/RAD51/BLM/MCM2/CDC45/GINS3/MCM3/MCM5/MCM7	12	5.71429
GO:0090307	BP	GO:0090307	mitotic spindle assembly	19/605	71/18870	5.69E-13	2.65E-11	1.97E-11	RACGAP1/NEK2/KIF23/KIF11/PRC1/MYBL2/KIF4A/SMC1A/BIRC5/STAG1/KIFC1/CDCA8/MZT1/CDC20/TPX2/AURKB/KIF2A/CHEK2/SMC3	19	2.67606
GO:0036297	BP	GO:0036297	interstrand cross-link repair	15/605	40/18870	6.28E-13	2.89E-11	2.15E-11	FANCI/RAD51AP1/RAD51/FANCC/DCLRE1B/RNF168/FANCD2/FANCG/FANCE/FANCA/FANCL/FANCB/ATR/FANCM/NUCKS1	15	3.75
GO:0045132	BP	GO:0045132	meiotic chromosome segregation	21/605	91/18870	8.13E-13	3.71E-11	2.76E-11	BRIP1/TTK/AURKA/SMC2/CCNE2/CCNB2/ASPM/NUF2/NDC80/TRIP13/FBXO5/SMC4/PSMC3IP/FANCD2/PTTG1/CCNE1/PTTG3P/MND1/ESPL1/MLH1/ATM	21	2.30769
GO:0007062	BP	GO:0007062	sister chromatid cohesion	17/605	59/18870	2.54E-12	1.15E-10	8.53E-11	ESCO2/DSCC1/FEN1/CDCA5/BUB1B/RAD51C/SMC1A/BUB1/PDS5B/STAG1/RB1/CDC20/RAD21/KIF22/ESPL1/AXIN2/SMC3	17	2.88136
GO:0035825	BP	GO:0035825	homologous recombination	18/605	68/18870	2.86E-12	1.28E-10	9.50E-11	UHRF1/BRIP1/RAD51AP1/RAD51/TOP2A/TRIP13/BRCA1/RAD51C/RAD54L/PSMC3IP/FANCD2/BARD1/MND1/RAD21/FANCM/MLH1/ATM/NUCKS1	18	2.64706
GO:1902806	BP	GO:1902806	regulation of cell cycle G1/S phase transition	30/605	209/18870	5.88E-12	2.61E-10	1.94E-10	STIL/CDKN2A/RBL1/RRM2/CDC6/E2F7/EZH2/CDK2/KIF14/RRM1/CDKN2C/CENPJ/RB1/E2F1/CASP2/BID/WEE1/RPA2/CCND1/CRADD/FAM83D/SOX2/PRKDC/TFDP1/MNAT1/PIDD1/CHEK2/ATM/CCND2/ID2	30	1.43541
GO:2000045	BP	GO:2000045	regulation of G1/S transition of mitotic cell cycle	28/605	183/18870	6.27E-12	2.76E-10	2.05E-10	STIL/CDKN2A/RBL1/RRM2/CDC6/E2F7/EZH2/CDK2/KIF14/RRM1/CDKN2C/CENPJ/RB1/E2F1/CASP2/BID/WEE1/RPA2/CCND1/CRADD/PRKDC/TFDP1/MNAT1/PIDD1/CHEK2/ATM/CCND2/ID2	28	1.53005
GO:0000727	BP	GO:0000727	double-strand break repair via break-induced replication	9/605	12/18870	6.82E-12	2.97E-10	2.20E-10	MCM6/CDC7/MCM4/GINS2/MCM2/CDC45/MCM3/MCM5/MCM7	9	7.5
GO:0051054	BP	GO:0051054	positive regulation of DNA metabolic process	36/605	298/18870	8.06E-12	3.47E-10	2.58E-10	CDC7/RFC3/CDK1/RAD51AP1/PRIM2/DBF4/NEK2/RAD51/E2F8/DSCC1/PCNA/USP1/CCNA2/E2F7/CDK2/RNF168/BRCA1/PARP1/RFC4/FOXM1/TIMELESS/BAX/AURKB/EREG/FANCB/ATR/PRKDC/MLH1/MSH2/ING3/PAXIP1/ATM/MYC/RFC2/PTPRC/BABAM1	36	1.20805
GO:0008630	BP	GO:0008630	intrinsic apoptotic signaling pathway in response to DNA damage	21/605	102/18870	8.59E-12	3.67E-10	2.72E-10	BRCA1/IFI16/E2F1/CASP2/BID/BRCA2/DYRK2/BAX/BCL2L11/HIPK2/PRKDC/MLH1/MSH2/PHLDA3/TP73/CXCL12/CHEK2/ATM/BCL2L10/CLU/PIK3R1	21	2.05882
GO:0000079	BP	GO:0000079	regulation of cyclin-dependent protein serine/threonine kinase activity	19/605	82/18870	9.31E-12	3.94E-10	2.93E-10	CDC25A/CDKN2A/BLM/CCNB1/CCNE2/CCNB2/CCNA2/CDC6/CDKN3/CDC25C/CDKN2C/CCNE1/CCNF/PSRC1/CCND1/MNAT1/CCNG2/CCND2/CCNA1	19	2.31707
GO:0010639	BP	GO:0010639	negative regulation of organelle organization	40/605	363/18870	1.03E-11	4.31E-10	3.20E-10	ZWILCH/ZWINT/CHEK1/TTK/CCNB1/SPC25/STMN1/NUF2/NDC80/CENPF/TOP2A/BUB1B/TRIP13/FBXO5/BRCA1/BUB3/PARP1/BUB1/CCP110/BIRC5/MAD2L1/CDCA8/CCNF/SPC24/CDC20/TPX2/AURKB/RAD21/PIF1/ZW10/BNIP3/MNAT1/ESPL1/OPA1/GCLC/ATM/ACAA2/MET/CLU/PIK3R1	40	1.10193
GO:0051347	BP	GO:0051347	positive regulation of transferase activity	43/605	414/18870	1.21E-11	5.02E-10	3.73E-10	RFC3/PRIM2/NEK2/DSCC1/BORA/PCNA/EZH2/ECT2/CLSPN/KIF14/RFC4/CENPE/UBE2C/PSRC1/CDC20/TPX2/CD86/AURKB/EREG/CCND1/EGR1/NRG1/TLR4/UBE2S/PTK2/CCDC88A/RASGRP1/EDN3/ROBO1/ANG/XRCC6/CD200/IL18/CHI3L1/TNFSF11/AXIN2/MYC/CCND2/MET/CLU/LCP2/RFC2/PTPRC	43	1.03865
GO:1904029	BP	GO:1904029	regulation of cyclin-dependent protein kinase activity	19/605	85/18870	1.84E-11	7.56E-10	5.62E-10	CDC25A/CDKN2A/BLM/CCNB1/CCNE2/CCNB2/CCNA2/CDC6/CDKN3/CDC25C/CDKN2C/CCNE1/CCNF/PSRC1/CCND1/MNAT1/CCNG2/CCND2/CCNA1	19	2.23529
GO:0006298	BP	GO:0006298	mismatch repair	13/605	35/18870	2.57E-11	1.05E-09	7.79E-10	EXO1/PCNA/RPA3/RNASEH2A/RPA1/RPA2/LIG1/POLD3/MLH1/MSH2/TP73/AXIN2/XPC	13	3.71429
GO:0034502	BP	GO:0034502	protein localization to chromosome	22/605	119/18870	2.61E-11	1.06E-09	7.85E-10	ZWILCH/ESCO2/CDK1/TTK/VRK1/EZH2/BUB1B/BUB3/PARP1/RPA1/CENPA/RB1/BRCA2/XRCC4/AURKB/RPA2/ATR/RAD21/ESR1/ZW10/MSH2/LEF1	22	1.84874
GO:0010971	BP	GO:0010971	positive regulation of G2/M transition of mitotic cell cycle	12/605	29/18870	3.34E-11	1.34E-09	9.94E-10	DTL/CDC7/CDK1/CDC25A/CCNB1/CDC25C/FBXO5/RRM1/RAD51C/CCND1/CDC25B/CDK4	12	4.13793
GO:0010332	BP	GO:0010332	response to gamma radiation	15/605	51/18870	3.59E-11	1.43E-09	1.06E-09	PARP1/FANCD2/BRCA2/BAX/EGR1/ATR/IL1A/PRKDC/XRCC6/CRYAB/CHEK2/CXCL10/ATM/MYC/PTPRC	15	2.94118
GO:0071479	BP	GO:0071479	cellular response to ionizing radiation	17/605	70/18870	5.19E-11	2.05E-09	1.52E-09	RAD51AP1/RAD51/BLM/ECT2/BRCA1/IFI16/BARD1/BRCA2/EGR1/TNKS1BP1/ATR/XRCC6/CRYAB/CHEK2/ATM/NUCKS1/CCND2	17	2.42857
GO:0022616	BP	GO:0022616	DNA strand elongation	13/605	37/18870	5.85E-11	2.29E-09	1.70E-09	MCM4/RFC3/GINS1/PCNA/DCLRE1B/POLA1/RFC4/MCM3/LIG1/POLD3/MCM7/POLE/NUCKS1	13	3.51351
GO:1902751	BP	GO:1902751	positive regulation of cell cycle G2/M phase transition	12/605	32/18870	1.33E-10	5.15E-09	3.83E-09	DTL/CDC7/CDK1/CDC25A/CCNB1/CDC25C/FBXO5/RRM1/RAD51C/CCND1/CDC25B/CDK4	12	3.75
GO:0045005	BP	GO:0045005	DNA-templated DNA replication maintenance of fidelity	15/605	56/18870	1.58E-10	6.06E-09	4.50E-09	TIPIN/RAD51/BLM/PCNA/DONSON/BRCA1/PARP1/BARD1/BRCA2/TIMELESS/ATR/POLE/FANCM/POLD1/NUCKS1	15	2.67857
GO:0000723	BP	GO:0000723	telomere maintenance	24/605	156/18870	1.82E-10	6.93E-09	5.15E-09	NEK2/RAD51/BLM/EXO1/CCNE2/PCNA/FEN1/RPA3/DCLRE1B/PARP1/RAD51C/RPA1/CCNE1/BRCA2/AURKB/RPA2/SMC6/TNKS1BP1/ATR/PIF1/PRKDC/XRCC6/ATM/MYC	24	1.53846
GO:0051988	BP	GO:0051988	regulation of attachment of spindle microtubules to kinetochore	10/605	21/18870	2.73E-10	1.03E-08	7.68E-09	ZWILCH/RACGAP1/NEK2/CCNB1/SPAG5/ECT2/BIRC5/CDCA8/AURKB/ZW10	10	4.7619
GO:0051302	BP	GO:0051302	regulation of cell division	26/605	186/18870	2.78E-10	1.04E-08	7.75E-09	RACGAP1/AURKA/KIF23/E2F8/BLM/ASPM/CDC6/PRC1/E2F7/ECT2/KIF20B/KIF14/KIF20A/CCP110/BIRC5/CDCA8/BRCA2/AURKB/EREG/KIF18B/TGFA/IL1A/CDC25B/MYC/MACC1/EVI2B	26	1.39785
GO:1903131	BP	GO:1903131	mononuclear cell differentiation	44/605	481/18870	4.41E-10	1.64E-08	1.22E-08	EZH2/FANCD2/IFI16/CR2/FANCA/SP3/BAX/CD86/TPD52/EGR1/RIPK2/METTL3/IL1A/PRKDC/MYB/SLAMF8/CD3G/FCER1G/STAT4/RASGRP1/MSH2/ITK/CD3D/SYK/LEF1/IRF7/XRCC6/NFIL3/CTLA4/ASCL2/GPR183/IL18/ATM/HLX/IL15RA/PNP/MED1/MYC/IL7R/PTPRC/CD27/CD83/ID2/PIK3R1	44	0.914761
GO:0009411	BP	GO:0009411	response to UV	23/605	152/18870	6.11E-10	2.25E-08	1.67E-08	DTL/TIPIN/CDC25A/PCNA/USP1/FEN1/PARP1/BRCA2/BAX/EIF2S1/AURKB/CCND1/PBK/ATR/POLD3/MMP9/METTL3/MSH2/BMF/POLD1/MYC/XPC/PIK3R1	23	1.51316
GO:1903706	BP	GO:1903706	regulation of hemopoiesis	40/605	417/18870	7.03E-10	2.57E-08	1.91E-08	HMGB2/FANCD2/RB1/FANCA/LRRC17/CD86/CASP8/STAT1/RIPK2/METTL3/TLR4/PRKDC/MYB/SLAMF8/PRKCA/RASGRP1/CSF3/SYK/LOX/LEF1/PRMT1/IRF7/XRCC6/CTLA4/ASCL2/IL18/HLX/IL15RA/PNP/TNFSF11/MED1/MYC/IL7R/PTPRC/CD27/CD83/ID2/EVI2B/GATA2/PIK3R1	40	0.959233
GO:0001819	BP	GO:0001819	positive regulation of cytokine production	44/605	499/18870	1.39E-09	5.06E-08	3.76E-08	BRCA1/HMGB2/IFI16/G3BP1/EIF2AK2/POLR3C/HDAC2/C3AR1/CD86/CD14/IFNGR1/CASP8/EREG/SMAD3/F3/STAT1/EGR1/RIPK2/MMP12/RAD21/TLR4/TSLP/IL1A/MYB/TLR2/FCER1G/CD274/RASGRP1/CLEC5A/SLC7A5/ITK/SYK/IRF5/IRF7/CD200/IL18/CHI3L1/PNP/IL12RB2/CLU/PTPRC/HLA-DPA1/CD83/PIK3R1	44	0.881764
GO:0032200	BP	GO:0032200	telomere organization	25/605	187/18870	1.59E-09	5.68E-08	4.22E-08	NEK2/RAD51/BLM/EXO1/CCNE2/PCNA/FEN1/RPA3/DCLRE1B/EZH2/PARP1/RAD51C/RPA1/CCNE1/BRCA2/AURKB/RPA2/SMC6/TNKS1BP1/ATR/PIF1/PRKDC/XRCC6/ATM/MYC	25	1.3369
GO:0007064	BP	GO:0007064	mitotic sister chromatid cohesion	11/605	31/18870	1.59E-09	5.68E-08	4.22E-08	ESCO2/DSCC1/CDCA5/SMC1A/BUB1/PDS5B/STAG1/RB1/CDC20/RAD21/SMC3	11	3.54839
GO:0030098	BP	GO:0030098	lymphocyte differentiation	40/605	429/18870	1.61E-09	5.72E-08	4.25E-08	EZH2/FANCD2/CR2/FANCA/SP3/BAX/CD86/TPD52/EGR1/RIPK2/METTL3/IL1A/PRKDC/MYB/SLAMF8/CD3G/FCER1G/STAT4/RASGRP1/MSH2/ITK/CD3D/SYK/LEF1/XRCC6/NFIL3/CTLA4/ASCL2/GPR183/IL18/ATM/HLX/IL15RA/PNP/IL7R/PTPRC/CD27/CD83/ID2/PIK3R1	40	0.932401
GO:0072331	BP	GO:0072331	signal transduction by p53 class mediator	24/605	175/18870	2.00E-09	7.06E-08	5.24E-08	CHEK1/AURKA/E2F7/IFI16/FOXM1/E2F1/CASP2/E2F2/BRCA2/DYRK2/BAX/AURKB/ATR/CRADD/HIPK2/MSH2/PIDD1/PAXIP1/PHLDA3/TP73/CHEK2/ATM/MYC/PMAIP1	24	1.37143
GO:0007080	BP	GO:0007080	mitotic metaphase chromosome alignment	14/605	57/18870	2.25E-09	7.83E-08	5.81E-08	CCNB1/NUF2/NDC80/KIF2C/CDCA5/KIF14/CENPE/BIRC5/KIFC1/CDCA8/PSRC1/AURKB/KIF22/ZW10	14	2.45614
GO:0090200	BP	GO:0090200	positive regulation of release of cytochrome c from mitochondria	10/605	25/18870	2.26E-09	7.83E-08	5.81E-08	BID/BAX/BCL2L11/TNFSF10/MMP9/PLAUR/BNIP3/BMF/MLLT11/PMAIP1	10	4
GO:0051231	BP	GO:0051231	spindle elongation	8/605	14/18870	2.70E-09	9.23E-08	6.85E-08	RACGAP1/KIF23/KIF11/PRC1/KIF4A/BIRC5/CDCA8/AURKB	8	5.71429
GO:0051255	BP	GO:0051255	spindle midzone assembly	8/605	14/18870	2.70E-09	9.23E-08	6.85E-08	RACGAP1/KIF23/PRC1/KIF4A/BIRC5/CDCA8/AURKB/MLH1	8	5.71429
GO:0097193	BP	GO:0097193	intrinsic apoptotic signaling pathway	33/605	319/18870	3.46E-09	1.17E-07	8.71E-08	MELK/HELLS/BRCA1/PARP1/IFI16/E2F1/CASP2/BID/E2F2/BRCA2/DYRK2/BAX/BCL2L11/MMP9/APAF1/PLAUR/HIPK2/PRKDC/BNIP3/MLH1/MSH2/OPA1/PHLDA3/TP73/CXCL12/MLLT11/CHEK2/ATM/BCL2L10/MYC/CLU/PMAIP1/PIK3R1	33	1.03448
GO:1902105	BP	GO:1902105	regulation of leukocyte differentiation	33/605	321/18870	4.05E-09	1.36E-07	1.01E-07	FANCD2/RB1/FANCA/LRRC17/CD86/CASP8/RIPK2/METTL3/TLR4/PRKDC/SLAMF8/PRKCA/RASGRP1/SYK/LEF1/IRF7/XRCC6/CTLA4/ASCL2/IL18/HLX/IL15RA/PNP/TNFSF11/MYC/IL7R/PTPRC/CD27/CD83/ID2/EVI2B/GATA2/PIK3R1	33	1.02804
GO:0007131	BP	GO:0007131	reciprocal meiotic recombination	14/605	60/18870	4.65E-09	1.54E-07	1.15E-07	BRIP1/RAD51AP1/RAD51/TOP2A/TRIP13/RAD51C/RAD54L/PSMC3IP/FANCD2/MND1/RAD21/FANCM/MLH1/ATM	14	2.33333
GO:0140527	BP	GO:0140527	reciprocal homologous recombination	14/605	60/18870	4.65E-09	1.54E-07	1.15E-07	BRIP1/RAD51AP1/RAD51/TOP2A/TRIP13/RAD51C/RAD54L/PSMC3IP/FANCD2/MND1/RAD21/FANCM/MLH1/ATM	14	2.33333
GO:0009394	BP	GO:0009394	2'-deoxyribonucleotide metabolic process	12/605	42/18870	4.86E-09	1.60E-07	1.19E-07	RRM2/RRM1/TYMS/DCTPP1/MBD4/DUT/DCK/DGUOK/CMPK2/DTYMK/DPYD/PNP	12	2.85714
GO:0009263	BP	GO:0009263	deoxyribonucleotide biosynthetic process	8/605	15/18870	5.63E-09	1.81E-07	1.35E-07	RRM2/RRM1/TYMS/DUT/DCK/DGUOK/CMPK2/DTYMK	8	5.33333
GO:0009265	BP	GO:0009265	2'-deoxyribonucleotide biosynthetic process	8/605	15/18870	5.63E-09	1.81E-07	1.35E-07	RRM2/RRM1/TYMS/DUT/DCK/DGUOK/CMPK2/DTYMK	8	5.33333
GO:0046385	BP	GO:0046385	deoxyribose phosphate biosynthetic process	8/605	15/18870	5.63E-09	1.81E-07	1.35E-07	RRM2/RRM1/TYMS/DUT/DCK/DGUOK/CMPK2/DTYMK	8	5.33333
GO:0032465	BP	GO:0032465	regulation of cytokinesis	17/605	93/18870	5.73E-09	1.84E-07	1.36E-07	RACGAP1/AURKA/KIF23/E2F8/CDC6/PRC1/E2F7/ECT2/KIF20B/KIF14/KIF20A/CCP110/BIRC5/CDCA8/BRCA2/AURKB/CDC25B	17	1.82796
GO:0070482	BP	GO:0070482	response to oxygen levels	34/605	343/18870	5.98E-09	1.90E-07	1.41E-07	BRIP1/CCNA2/SUV39H1/CA9/DPP4/HDAC2/PLOD2/SMAD3/EGR1/RAD21/EPAS1/APAF1/IL1A/HIPK2/SOX2/MYB/TLR2/BNIP3/CXCR4/SLC2A1/SLC7A5/ANG/CXCL12/CRYAB/ASCL2/ATM/ACAA2/DNMT3A/MYC/NR4A2/PLAU/NDP/PMAIP1/CD38	34	0.991254
GO:0009262	BP	GO:0009262	deoxyribonucleotide metabolic process	12/605	43/18870	6.54E-09	2.05E-07	1.52E-07	RRM2/RRM1/TYMS/DCTPP1/MBD4/DUT/DCK/DGUOK/CMPK2/DTYMK/DPYD/PNP	12	2.7907
GO:0019692	BP	GO:0019692	deoxyribose phosphate metabolic process	12/605	43/18870	6.54E-09	2.05E-07	1.52E-07	RRM2/RRM1/TYMS/DCTPP1/MBD4/DUT/DCK/DGUOK/CMPK2/DTYMK/DPYD/PNP	12	2.7907
GO:0051656	BP	GO:0051656	establishment of organelle localization	41/605	469/18870	6.62E-09	2.06E-07	1.53E-07	NUSAP1/ZWILCH/RACGAP1/NEK2/CCNB1/SPC25/SPAG5/NUF2/NDC80/KIF2C/CDCA5/CENPF/ECT2/BUB3/KIF14/CENPE/BIRC5/CENPA/MAD2L1/KIFC1/RB1/CDCA8/DSN1/LMNB1/NEFH/SPC24/PSRC1/GPSM2/AURKB/KIF5A/FAM83D/KIF22/ZW10/ESPL1/RASGRP1/MLH1/OPA1/SYK/RAN/ATM/GATA2	41	0.8742
GO:0042113	BP	GO:0042113	B cell activation	30/605	278/18870	6.76E-09	2.09E-07	1.55E-07	EXO1/EZH2/RNF168/CR2/SP3/CTPS1/BAX/CD86/CASP8/TPD52/TLR4/PRKDC/SLAMF8/RASGRP1/MLH1/MSH2/PAXIP1/SYK/LEF1/CTLA4/GPR183/ATM/AHR/IL7R/PTPRC/BST2/CD27/ID2/CD38/PIK3R1	30	1.07914
GO:0051383	BP	GO:0051383	kinetochore organization	9/605	21/18870	7.03E-09	2.16E-07	1.60E-07	DLGAP5/SMC2/NUF2/NDC80/CENPF/SMC4/CENPE/CENPW/CENPA	9	4.28571
GO:0001666	BP	GO:0001666	response to hypoxia	31/605	298/18870	9.09E-09	2.78E-07	2.06E-07	BRIP1/CCNA2/SUV39H1/CA9/DPP4/PLOD2/SMAD3/EGR1/RAD21/EPAS1/APAF1/IL1A/HIPK2/MYB/TLR2/BNIP3/CXCR4/SLC2A1/ANG/CXCL12/CRYAB/ASCL2/ATM/ACAA2/DNMT3A/MYC/NR4A2/PLAU/NDP/PMAIP1/CD38	31	1.04027
GO:0036293	BP	GO:0036293	response to decreased oxygen levels	32/605	315/18870	9.32E-09	2.83E-07	2.10E-07	BRIP1/CCNA2/SUV39H1/CA9/DPP4/PLOD2/SMAD3/EGR1/RAD21/EPAS1/APAF1/IL1A/HIPK2/SOX2/MYB/TLR2/BNIP3/CXCR4/SLC2A1/ANG/CXCL12/CRYAB/ASCL2/ATM/ACAA2/DNMT3A/MYC/NR4A2/PLAU/NDP/PMAIP1/CD38	32	1.01587
GO:0051256	BP	GO:0051256	mitotic spindle midzone assembly	7/605	11/18870	9.93E-09	2.99E-07	2.22E-07	RACGAP1/KIF23/PRC1/KIF4A/BIRC5/CDCA8/AURKB	7	6.36364
GO:0090199	BP	GO:0090199	regulation of release of cytochrome c from mitochondria	12/605	45/18870	1.16E-08	3.46E-07	2.57E-07	BID/BAX/BCL2L11/TNFSF10/MMP9/PLAUR/BNIP3/OPA1/BMF/MLLT11/CLU/PMAIP1	12	2.66667
GO:1905820	BP	GO:1905820	positive regulation of chromosome separation	10/605	29/18870	1.23E-08	3.66E-07	2.72E-07	DLGAP5/SMC2/SMC4/UBE2C/BIRC5/RB1/CDCA8/CDC20/AURKB/ESPL1	10	3.44828
GO:1901976	BP	GO:1901976	regulation of cell cycle checkpoint	12/605	46/18870	1.52E-08	4.49E-07	3.34E-07	RAD51/CCNB1/NDC80/WDR76/BRCA1/BIRC5/MAD2L1/BARD1/CDCA8/BRCA2/AURKB/RPA2	12	2.6087
GO:2000116	BP	GO:2000116	regulation of cysteine-type endopeptidase activity	24/605	195/18870	1.76E-08	5.18E-07	3.85E-07	IFI16/LAMP3/CASP2/BID/BAX/CASP8/SMAD3/F3/TNFSF10/RIPK2/CRADD/MMP9/APAF1/CASP8AP2/PLAUR/SOX2/ARL6IP1/PIDD1/ROBO1/SYK/BCL2L10/MYC/PMAIP1/BIRC3	24	1.23077
GO:0007143	BP	GO:0007143	female meiotic nuclear division	11/605	38/18870	1.84E-08	5.37E-07	3.99E-07	TTK/AURKA/CCNB2/NDC80/TOP2A/TRIP13/FBXO5/EREG/MLH1/CDC25B/ATM	11	2.89474
GO:0010972	BP	GO:0010972	negative regulation of G2/M transition of mitotic cell cycle	14/605	67/18870	2.13E-08	6.19E-07	4.59E-07	DTL/CDK1/CHEK1/BLM/CDC6/DONSON/BRCA1/CLSPN/BARD1/AURKB/RAD21/FOXN3/ATM/BABAM1	14	2.08955
GO:0000022	BP	GO:0000022	mitotic spindle elongation	7/605	12/18870	2.32E-08	6.68E-07	4.96E-07	RACGAP1/KIF23/PRC1/KIF4A/BIRC5/CDCA8/AURKB	7	5.83333
GO:0034644	BP	GO:0034644	cellular response to UV	16/605	90/18870	2.44E-08	6.95E-07	5.16E-07	CDC25A/PCNA/PARP1/BAX/EIF2S1/AURKB/PBK/ATR/POLD3/MMP9/METTL3/BMF/POLD1/MYC/XPC/PIK3R1	16	1.77778
GO:0097191	BP	GO:0097191	extrinsic apoptotic signaling pathway	26/605	229/18870	2.44E-08	6.95E-07	5.16E-07	BRCA1/HMGB2/STK3/CASP2/BID/STK4/BAX/BCL2L11/CASP8/SMAD3/TNFSF10/CRADD/TLR4/CASP8AP2/IL1A/PIDD1/GCLC/SIVA1/MLLT11/ATF3/BCL2L10/PTPRC/GCLM/CD27/PMAIP1/PIK3R1	26	1.13537
GO:0031297	BP	GO:0031297	replication fork processing	12/605	49/18870	3.30E-08	9.34E-07	6.93E-07	TIPIN/RAD51/BLM/PCNA/DONSON/BRCA1/PARP1/BARD1/BRCA2/ATR/FANCM/NUCKS1	12	2.44898
GO:1901970	BP	GO:1901970	positive regulation of mitotic sister chromatid separation	8/605	18/18870	3.51E-08	9.88E-07	7.34E-07	DLGAP5/UBE2C/BIRC5/RB1/CDCA8/CDC20/AURKB/ESPL1	8	4.44444
GO:0045860	BP	GO:0045860	positive regulation of protein kinase activity	29/605	282/18870	3.54E-08	9.90E-07	7.36E-07	BORA/EZH2/ECT2/CLSPN/KIF14/CENPE/PSRC1/TPX2/CD86/EREG/CCND1/EGR1/NRG1/TLR4/PTK2/CCDC88A/RASGRP1/EDN3/ROBO1/ANG/XRCC6/IL18/CHI3L1/TNFSF11/AXIN2/CCND2/CLU/LCP2/PTPRC	29	1.02837
GO:1902750	BP	GO:1902750	negative regulation of cell cycle G2/M phase transition	14/605	70/18870	3.85E-08	1.07E-06	7.95E-07	DTL/CDK1/CHEK1/BLM/CDC6/DONSON/BRCA1/CLSPN/BARD1/AURKB/RAD21/FOXN3/ATM/BABAM1	14	2
GO:0000910	BP	GO:0000910	cytokinesis	23/605	188/18870	3.91E-08	1.08E-06	8.03E-07	NUSAP1/RACGAP1/AURKA/KIF23/E2F8/ANLN/STMN1/CDC6/PRC1/E2F7/KIF4A/ECT2/KIF20B/KIF14/KIF20A/CCP110/BIRC5/CENPA/CDCA8/BRCA2/AURKB/ESPL1/CDC25B	23	1.2234
GO:0044771	BP	GO:0044771	meiotic cell cycle phase transition	7/605	13/18870	4.88E-08	1.34E-06	9.95E-07	CDC25A/TTK/CCNB2/NDC80/CDC25C/CDC20/CDC25B	7	5.38462
GO:0043281	BP	GO:0043281	regulation of cysteine-type endopeptidase activity involved in apoptotic process	21/605	163/18870	6.20E-08	1.69E-06	1.26E-06	LAMP3/CASP2/BID/BAX/CASP8/SMAD3/F3/TNFSF10/CRADD/MMP9/APAF1/CASP8AP2/PLAUR/SOX2/ARL6IP1/PIDD1/ROBO1/SYK/BCL2L10/MYC/PMAIP1	21	1.28834
GO:0050900	BP	GO:0050900	leukocyte migration	35/605	396/18870	6.60E-08	1.79E-06	1.33E-06	DPP4/CHST4/C3AR1/APOD/CXCR3/P2RX4/IL1A/SLAMF8/FCER1G/PTK2/CXCL8/CXCR4/EDN3/CXCL9/EDN2/TACR1/CCL4/SYK/CXCL12/SELP/CXCL1/ABL2/CXCL10/CD200/ASCL2/GPR183/CHST2/CCL22/CCL18/CD177/TNFSF11/CXCL11/CXCR2/SELL/PIK3R1	35	0.883838
GO:0044818	BP	GO:0044818	mitotic G2/M transition checkpoint	12/605	53/18870	8.49E-08	2.29E-06	1.70E-06	DTL/CDK1/CHEK1/BLM/CDC6/DONSON/BRCA1/CLSPN/BARD1/FOXN3/ATM/BABAM1	12	2.26415
GO:0051984	BP	GO:0051984	positive regulation of chromosome segregation	9/605	27/18870	9.43E-08	2.53E-06	1.88E-06	CDK1/CCNB1/SMC2/CDC6/SMC4/BIRC5/CDCA8/AURKB/SMC6	9	3.33333
GO:0006284	BP	GO:0006284	base-excision repair	11/605	44/18870	9.85E-08	2.61E-06	1.94E-06	PCNA/FEN1/RPA3/PARP1/POLQ/RPA1/MBD4/RPA2/LIG1/POLE/POLD1	11	2.5
GO:0045840	BP	GO:0045840	positive regulation of mitotic nuclear division	11/605	44/18870	9.85E-08	2.61E-06	1.94E-06	NUSAP1/DLGAP5/AURKA/UBE2C/RB1/CDC20/EREG/TGFA/IL1A/ESPL1/EDN3	11	2.5
GO:0006220	BP	GO:0006220	pyrimidine nucleotide metabolic process	12/605	54/18870	1.06E-07	2.79E-06	2.07E-06	TYMS/DCTPP1/MBD4/DUT/DCK/CTPS1/CMPK2/CDA/DTYMK/UMPS/PRPS1/DPYD	12	2.22222
GO:0009123	BP	GO:0009123	nucleoside monophosphate metabolic process	14/605	77/18870	1.36E-07	3.57E-06	2.65E-06	TK1/TYMS/HPRT1/DUT/DCK/DGUOK/CMPK2/PAICS/CDA/DTYMK/UMPS/PRPS1/DPYD/PNP	14	1.81818
GO:1990266	BP	GO:1990266	neutrophil migration	18/605	129/18870	1.60E-07	4.15E-06	3.08E-06	DPP4/C3AR1/IL1A/SLAMF8/FCER1G/CXCL8/EDN3/CXCL9/EDN2/CCL4/SYK/CXCL1/CXCL10/CCL22/CCL18/CD177/CXCL11/CXCR2	18	1.39535
GO:2001056	BP	GO:2001056	positive regulation of cysteine-type endopeptidase activity	18/605	129/18870	1.60E-07	4.15E-06	3.08E-06	IFI16/CASP2/BID/BAX/CASP8/SMAD3/F3/TNFSF10/RIPK2/CRADD/APAF1/CASP8AP2/PIDD1/ROBO1/SYK/BCL2L10/MYC/PMAIP1	18	1.39535
GO:0002573	BP	GO:0002573	myeloid leukocyte differentiation	25/605	235/18870	1.62E-07	4.17E-06	3.10E-06	PARP1/IFI16/RB1/SP3/LBR/LRRC17/CASP8/MMP9/TLR4/TLR2/PRKCA/CSF3/LEF1/IRF7/GPR183/GPC3/FAM20C/TNFSF11/MED1/MYC/NDP/ID2/EVI2B/GATA2/PIK3R1	25	1.06383
GO:0001836	BP	GO:0001836	release of cytochrome c from mitochondria	12/605	56/18870	1.63E-07	4.17E-06	3.10E-06	BID/BAX/BCL2L11/TNFSF10/MMP9/PLAUR/BNIP3/OPA1/BMF/MLLT11/CLU/PMAIP1	12	2.14286
GO:0030099	BP	GO:0030099	myeloid cell differentiation	36/605	430/18870	1.66E-07	4.22E-06	3.14E-06	RACGAP1/PARP1/HMGB2/IFI16/RB1/SP3/LBR/LRRC17/CASP8/STAT1/MMP9/EPAS1/TLR4/HIPK2/PRKDC/MYB/TLR2/PRKCA/LYAR/CLEC5A/CSF3/LOX/LEF1/PRMT1/IRF7/GPR183/GPC3/FAM20C/TNFSF11/MED1/MYC/NDP/ID2/EVI2B/GATA2/PIK3R1	36	0.837209
GO:0007095	BP	GO:0007095	mitotic G2 DNA damage checkpoint signaling	10/605	37/18870	1.70E-07	4.30E-06	3.20E-06	DTL/CDK1/CHEK1/BLM/DONSON/BRCA1/CLSPN/FOXN3/ATM/BABAM1	10	2.7027
GO:0030174	BP	GO:0030174	regulation of DNA-templated DNA replication initiation	7/605	15/18870	1.73E-07	4.36E-06	3.24E-06	MCM6/MCM4/CDK2/MCM2/MCM3/MCM5/MCM7	7	4.66667
GO:0031571	BP	GO:0031571	mitotic G1 DNA damage checkpoint signaling	9/605	29/18870	1.90E-07	4.74E-06	3.52E-06	CDK2/CASP2/RPA2/CCND1/CRADD/PRKDC/PIDD1/CHEK2/ATM	9	3.10345
GO:0044819	BP	GO:0044819	mitotic G1/S transition checkpoint signaling	9/605	29/18870	1.90E-07	4.74E-06	3.52E-06	CDK2/CASP2/RPA2/CCND1/CRADD/PRKDC/PIDD1/CHEK2/ATM	9	3.10345
GO:0050867	BP	GO:0050867	positive regulation of cell activation	34/605	396/18870	2.03E-07	5.03E-06	3.74E-06	DPP4/CD86/RIPK2/TLR4/TSLP/IL1A/PRKDC/MYB/CD274/RASGRP1/MLH1/MSH2/TACR1/PAXIP1/SYK/SELP/LEF1/ICOS/ABL2/XRCC6/GPR183/IL18/HLX/IL15RA/PNP/CD177/TNFSF11/IL7R/PTPRC/HLA-DPA1/CD27/CD83/GATA2/CD38	34	0.858586
GO:0030217	BP	GO:0030217	T cell differentiation	29/605	307/18870	2.23E-07	5.49E-06	4.08E-06	FANCD2/FANCA/SP3/CD86/EGR1/RIPK2/METTL3/IL1A/PRKDC/MYB/CD3G/FCER1G/STAT4/RASGRP1/ITK/CD3D/SYK/LEF1/CTLA4/ASCL2/GPR183/IL18/HLX/PNP/IL7R/PTPRC/CD27/CD83/PIK3R1	29	0.944625
GO:0006606	BP	GO:0006606	protein import into nucleus	20/605	161/18870	2.34E-07	5.73E-06	4.26E-06	CDK1/ECT2/NUP107/CSE1L/KPNA2/STK3/NUP50/STK4/APOD/SMAD3/POLA2/NUP98/MMP12/NUP153/PPP3R1/SYK/E2F3/RAN/MED1/PIK3R1	20	1.24224
GO:1902807	BP	GO:1902807	negative regulation of cell cycle G1/S phase transition	15/605	95/18870	3.37E-07	8.23E-06	6.11E-06	RBL1/E2F7/EZH2/CDK2/RB1/CASP2/WEE1/RPA2/CCND1/CRADD/SOX2/PRKDC/PIDD1/CHEK2/ATM	15	1.57895
GO:0051785	BP	GO:0051785	positive regulation of nuclear division	12/605	60/18870	3.63E-07	8.80E-06	6.54E-06	NUSAP1/RAD51AP1/DLGAP5/AURKA/UBE2C/RB1/CDC20/EREG/TGFA/IL1A/ESPL1/EDN3	12	2
GO:0000731	BP	GO:0000731	DNA synthesis involved in DNA repair	10/605	40/18870	3.79E-07	9.15E-06	6.80E-06	DTL/RFC3/POLE2/PCNA/USP1/POLA1/RRM1/POLD3/POLE/POLD1	10	2.5
GO:0001890	BP	GO:0001890	placenta development	19/605	151/18870	3.82E-07	9.17E-06	6.81E-06	E2F8/PLK4/E2F7/PARP1/STK3/SP3/STK4/CCNF/CASP8/EPAS1/SPP1/PTK2/ANG/LEF1/ASCL2/MED1/HEY2/NDP/GATA2	19	1.25828
GO:0051170	BP	GO:0051170	import into nucleus	20/605	166/18870	3.86E-07	9.21E-06	6.84E-06	CDK1/ECT2/NUP107/CSE1L/KPNA2/STK3/NUP50/STK4/APOD/SMAD3/POLA2/NUP98/MMP12/NUP153/PPP3R1/SYK/E2F3/RAN/MED1/PIK3R1	20	1.20482
GO:0008637	BP	GO:0008637	apoptotic mitochondrial changes	16/605	110/18870	4.38E-07	1.04E-05	7.73E-06	BID/BAX/BCL2L11/TNFSF10/MMP9/PLAUR/BNIP3/OPA1/BMF/GCLC/MLLT11/ACAA2/GZMB/CLU/GCLM/PMAIP1	16	1.45455
GO:0072527	BP	GO:0072527	pyrimidine-containing compound metabolic process	14/605	85/18870	4.87E-07	1.15E-05	8.55E-06	TK1/RRM1/TYMS/DCTPP1/MBD4/DUT/DCK/CTPS1/CMPK2/CDA/DTYMK/UMPS/PRPS1/DPYD	14	1.64706
GO:0033674	BP	GO:0033674	positive regulation of kinase activity	30/605	337/18870	4.95E-07	1.16E-05	8.63E-06	BORA/EZH2/ECT2/CLSPN/KIF14/CENPE/PSRC1/TPX2/CD86/EREG/CCND1/EGR1/NRG1/TLR4/PTK2/CCDC88A/RASGRP1/EDN3/ROBO1/ANG/XRCC6/IL18/CHI3L1/TNFSF11/AXIN2/CCND2/MET/CLU/LCP2/PTPRC	30	0.890208
GO:0043280	BP	GO:0043280	positive regulation of cysteine-type endopeptidase activity involved in apoptotic process	16/605	111/18870	4.96E-07	1.16E-05	8.63E-06	CASP2/BID/BAX/CASP8/SMAD3/F3/TNFSF10/CRADD/APAF1/CASP8AP2/PIDD1/ROBO1/SYK/BCL2L10/MYC/PMAIP1	16	1.44144
GO:1902107	BP	GO:1902107	positive regulation of leukocyte differentiation	21/605	185/18870	5.42E-07	1.26E-05	9.33E-06	RB1/CD86/CASP8/RIPK2/PRKDC/PRKCA/RASGRP1/SYK/LEF1/XRCC6/IL18/HLX/IL15RA/PNP/TNFSF11/IL7R/PTPRC/CD27/CD83/ID2/EVI2B	21	1.13514
GO:1903708	BP	GO:1903708	positive regulation of hemopoiesis	21/605	185/18870	5.42E-07	1.26E-05	9.33E-06	RB1/CD86/CASP8/RIPK2/PRKDC/PRKCA/RASGRP1/SYK/LEF1/XRCC6/IL18/HLX/IL15RA/PNP/TNFSF11/IL7R/PTPRC/CD27/CD83/ID2/EVI2B	21	1.13514
GO:2000134	BP	GO:2000134	negative regulation of G1/S transition of mitotic cell cycle	14/605	86/18870	5.65E-07	1.30E-05	9.67E-06	RBL1/E2F7/EZH2/CDK2/RB1/CASP2/WEE1/RPA2/CCND1/CRADD/PRKDC/PIDD1/CHEK2/ATM	14	1.62791
GO:1990868	BP	GO:1990868	response to chemokine	15/605	99/18870	5.85E-07	1.33E-05	9.91E-06	SLIT3/CXCR3/CXCL8/CXCR4/CXCL9/CCL4/ROBO1/CXCL12/LOX/CXCL1/CXCL10/CCL22/CCL18/CXCL11/CXCR2	15	1.51515
GO:1990869	BP	GO:1990869	cellular response to chemokine	15/605	99/18870	5.85E-07	1.33E-05	9.91E-06	SLIT3/CXCR3/CXCL8/CXCR4/CXCL9/CCL4/ROBO1/CXCL12/LOX/CXCL1/CXCL10/CCL22/CCL18/CXCL11/CXCR2	15	1.51515
GO:0097530	BP	GO:0097530	granulocyte migration	19/605	156/18870	6.35E-07	1.44E-05	1.07E-05	DPP4/C3AR1/IL1A/SLAMF8/FCER1G/PTK2/CXCL8/EDN3/CXCL9/EDN2/CCL4/SYK/CXCL1/CXCL10/CCL22/CCL18/CD177/CXCL11/CXCR2	19	1.21795
GO:0006221	BP	GO:0006221	pyrimidine nucleotide biosynthetic process	9/605	33/18870	6.53E-07	1.48E-05	1.10E-05	TYMS/DUT/DCK/CTPS1/CMPK2/CDA/DTYMK/UMPS/PRPS1	9	2.72727
GO:0002696	BP	GO:0002696	positive regulation of leukocyte activation	32/605	380/18870	7.12E-07	1.60E-05	1.19E-05	DPP4/CD86/RIPK2/TLR4/TSLP/IL1A/PRKDC/CD274/RASGRP1/MLH1/MSH2/TACR1/PAXIP1/SYK/LEF1/ICOS/ABL2/XRCC6/GPR183/IL18/HLX/IL15RA/PNP/CD177/TNFSF11/IL7R/PTPRC/HLA-DPA1/CD27/CD83/GATA2/CD38	32	0.842105
GO:0060326	BP	GO:0060326	cell chemotaxis	29/605	325/18870	7.31E-07	1.64E-05	1.22E-05	HMGB2/DPP4/C3AR1/CXCR3/P2RX4/SLAMF8/FCER1G/PTK2/CXCL8/CXCR4/EDN3/CXCL9/EDN2/CCL4/SYK/CXCL12/LOX/CXCL1/LEF1/CXCL10/GPR183/CXCL14/CCL22/CCL18/TNFSF11/HBEGF/MET/CXCL11/CXCR2	29	0.892308
GO:0000281	BP	GO:0000281	mitotic cytokinesis	14/605	88/18870	7.55E-07	1.68E-05	1.25E-05	NUSAP1/RACGAP1/KIF23/ANLN/STMN1/KIF4A/ECT2/KIF20B/KIF20A/BIRC5/CENPA/CDCA8/AURKB/ESPL1	14	1.59091
GO:0009124	BP	GO:0009124	nucleoside monophosphate biosynthetic process	10/605	43/18870	7.86E-07	1.73E-05	1.29E-05	TK1/TYMS/HPRT1/DUT/DCK/DGUOK/PAICS/CDA/UMPS/PRPS1	10	2.32558
GO:0072528	BP	GO:0072528	pyrimidine-containing compound biosynthetic process	10/605	43/18870	7.86E-07	1.73E-05	1.29E-05	TK1/TYMS/DUT/DCK/CTPS1/CMPK2/CDA/DTYMK/UMPS/PRPS1	10	2.32558
GO:0006303	BP	GO:0006303	double-strand break repair via nonhomologous end joining	12/605	65/18870	9.02E-07	1.96E-05	1.46E-05	DEK/DCLRE1B/POLA1/RNF168/HMGB2/POLQ/PSMD14/XRCC4/PRKDC/MLH1/XRCC6/ATM	12	1.84615
GO:0045143	BP	GO:0045143	homologous chromosome segregation	12/605	65/18870	9.02E-07	1.96E-05	1.46E-05	BRIP1/CCNE2/TRIP13/PSMC3IP/FANCD2/PTTG1/CCNE1/PTTG3P/MND1/ESPL1/MLH1/ATM	12	1.84615
GO:0070192	BP	GO:0070192	chromosome organization involved in meiotic cell cycle	12/605	65/18870	9.02E-07	1.96E-05	1.46E-05	BRIP1/RAD51/SMC2/CCNE2/TRIP13/SMC4/PSMC3IP/FANCD2/CCNE1/MND1/MLH1/ATM	12	1.84615
GO:0048732	BP	GO:0048732	gland development	35/605	443/18870	9.63E-07	2.09E-05	1.55E-05	AURKA/E2F8/CCNB2/PCNA/E2F7/EZH2/TYMS/SP3/DUT/BRCA2/FOXA1/BAX/BCL2L11/SMAD3/CCND1/NRG1/TGFA/UMPS/ESR1/HIPK2/SOX2/SLC7A5/IGFBP5/ROBO1/LEF1/ATM/HLX/TNFSF11/MED1/MET/FRZB/ID4/LAMA1/ID2/GATA2	35	0.790068
GO:0033598	BP	GO:0033598	mammary gland epithelial cell proliferation	8/605	26/18870	9.99E-07	2.14E-05	1.59E-05	BRCA2/BAX/CCND1/ESR1/ROBO1/TNFSF11/MED1/ID2	8	3.07692
GO:0051251	BP	GO:0051251	positive regulation of lymphocyte activation	29/605	330/18870	1.00E-06	2.14E-05	1.59E-05	DPP4/CD86/RIPK2/TLR4/IL1A/PRKDC/CD274/RASGRP1/MLH1/MSH2/TACR1/PAXIP1/SYK/LEF1/ICOS/ABL2/XRCC6/GPR183/IL18/HLX/IL15RA/PNP/TNFSF11/IL7R/PTPRC/HLA-DPA1/CD27/CD83/CD38	29	0.878788
GO:0097529	BP	GO:0097529	myeloid leukocyte migration	24/605	242/18870	1.03E-06	2.21E-05	1.64E-05	DPP4/C3AR1/P2RX4/IL1A/SLAMF8/FCER1G/PTK2/CXCL8/EDN3/CXCL9/EDN2/CCL4/SYK/CXCL12/CXCL1/CXCL10/CD200/CCL22/CCL18/CD177/TNFSF11/CXCL11/CXCR2/PIK3R1	24	0.991736
GO:0070661	BP	GO:0070661	leukocyte proliferation	30/605	350/18870	1.10E-06	2.33E-05	1.73E-05	HELLS/CR2/HPRT1/BID/CTPS1/BAX/CD86/RIPK2/TLR4/IL1A/PTK2/CD274/RASGRP1/TACR1/SYK/LEF1/CTLA4/GPR183/IL18/ATM/AHR/PNP/TNFSF11/CLU/IL7R/PTPRC/HLA-DPA1/BST2/NDP/CD38	30	0.857143
GO:0009112	BP	GO:0009112	nucleobase metabolic process	9/605	35/18870	1.13E-06	2.39E-05	1.77E-05	RRM1/TYMS/HPRT1/CTPS1/PAICS/CDA/UMPS/PRPS1/DPYD	9	2.57143
GO:0051402	BP	GO:0051402	neuron apoptotic process	26/605	278/18870	1.14E-06	2.39E-05	1.78E-05	MYBL2/PARP1/KIF14/RB1/CASP2/BID/BAX/BCL2L11/CASP8/CCND1/EGR1/PRKCI/RAD21/SET/APAF1/PPT1/HIPK2/MYB/BNIP3/MSH2/GCLC/ATM/NR4A2/CLU/GCLM/NDP	26	0.935252
GO:0070098	BP	GO:0070098	chemokine-mediated signaling pathway	14/605	91/18870	1.15E-06	2.40E-05	1.79E-05	SLIT3/CXCR3/CXCL8/CXCR4/CXCL9/CCL4/ROBO1/CXCL12/CXCL1/CXCL10/CCL22/CCL18/CXCL11/CXCR2	14	1.53846
GO:0000212	BP	GO:0000212	meiotic spindle organization	7/605	19/18870	1.21E-06	2.53E-05	1.88E-05	AURKA/CCNB2/ASPM/NDC80/FBXO5/ESPL1/TUBG1	7	3.68421
GO:0006935	BP	GO:0006935	chemotaxis	36/605	468/18870	1.26E-06	2.62E-05	1.95E-05	HMGB2/DPP4/C3AR1/SMAD3/SLIT3/F3/CXCR3/NRG1/P2RX4/PLAUR/SLAMF8/FCER1G/PTK2/CXCL8/CXCR4/EDN3/CXCL9/EDN2/CCL4/ROBO1/SYK/CXCL12/LOX/CXCL1/LEF1/CXCL10/GPR183/CXCL14/CCL22/CCL18/TNFSF11/HBEGF/MET/CXCL11/CXCR2/PLAU	36	0.769231
GO:0045619	BP	GO:0045619	regulation of lymphocyte differentiation	22/605	212/18870	1.36E-06	2.81E-05	2.09E-05	FANCD2/FANCA/CD86/RIPK2/METTL3/PRKDC/SLAMF8/RASGRP1/SYK/LEF1/XRCC6/CTLA4/ASCL2/IL18/HLX/IL15RA/PNP/IL7R/PTPRC/CD27/CD83/ID2	22	1.03774
GO:0042330	BP	GO:0042330	taxis	36/605	470/18870	1.40E-06	2.87E-05	2.13E-05	HMGB2/DPP4/C3AR1/SMAD3/SLIT3/F3/CXCR3/NRG1/P2RX4/PLAUR/SLAMF8/FCER1G/PTK2/CXCL8/CXCR4/EDN3/CXCL9/EDN2/CCL4/ROBO1/SYK/CXCL12/LOX/CXCL1/LEF1/CXCL10/GPR183/CXCL14/CCL22/CCL18/TNFSF11/HBEGF/MET/CXCL11/CXCR2/PLAU	36	0.765957
GO:0006919	BP	GO:0006919	activation of cysteine-type endopeptidase activity involved in apoptotic process	12/605	68/18870	1.49E-06	3.05E-05	2.26E-05	CASP2/BID/BAX/CASP8/SMAD3/F3/CRADD/APAF1/CASP8AP2/PIDD1/ROBO1/BCL2L10	12	1.76471
GO:0002685	BP	GO:0002685	regulation of leukocyte migration	23/605	230/18870	1.50E-06	3.05E-05	2.26E-05	DPP4/CHST4/C3AR1/APOD/CXCR3/P2RX4/IL1A/SLAMF8/PTK2/CXCL8/EDN3/EDN2/TACR1/CCL4/CXCL12/SELP/ABL2/CXCL10/CD200/ASCL2/CHST2/CXCR2/PIK3R1	23	1
GO:0007144	BP	GO:0007144	female meiosis I	6/605	13/18870	1.50E-06	3.05E-05	2.26E-05	AURKA/CCNB2/NDC80/TRIP13/FBXO5/CDC25B	6	4.61538
GO:0030593	BP	GO:0030593	neutrophil chemotaxis	15/605	107/18870	1.62E-06	3.27E-05	2.43E-05	DPP4/C3AR1/FCER1G/CXCL8/EDN3/CXCL9/EDN2/CCL4/SYK/CXCL1/CXCL10/CCL22/CCL18/CXCL11/CXCR2	15	1.40187
GO:0051781	BP	GO:0051781	positive regulation of cell division	14/605	94/18870	1.71E-06	3.45E-05	2.56E-05	RACGAP1/KIF23/CDC6/ECT2/KIF20B/KIF14/BIRC5/CDCA8/AURKB/EREG/TGFA/IL1A/CDC25B/MACC1	14	1.48936
GO:2000573	BP	GO:2000573	positive regulation of DNA biosynthetic process	12/605	69/18870	1.76E-06	3.52E-05	2.62E-05	RFC3/NEK2/DSCC1/PCNA/USP1/CCNA2/RFC4/AURKB/ATR/ATM/MYC/RFC2	12	1.73913
GO:0071900	BP	GO:0071900	regulation of protein serine/threonine kinase activity	26/605	285/18870	1.81E-06	3.62E-05	2.69E-05	CDC25A/CDKN2A/BLM/CCNB1/CCNE2/CCNB2/CCNA2/CDC6/CDKN3/EZH2/CDC25C/CDKN2C/RB1/CCNE1/CCNF/PSRC1/CCND1/TLR4/MNAT1/RASGRP1/EDN3/ROBO1/CCNG2/TNFSF11/CCND2/CCNA1	26	0.912281
GO:0032467	BP	GO:0032467	positive regulation of cytokinesis	10/605	47/18870	1.89E-06	3.76E-05	2.79E-05	RACGAP1/KIF23/CDC6/ECT2/KIF20B/KIF14/BIRC5/CDCA8/AURKB/CDC25B	10	2.12766
GO:0071482	BP	GO:0071482	cellular response to light stimulus	16/605	123/18870	2.02E-06	4.00E-05	2.97E-05	CDC25A/PCNA/PARP1/BAX/EIF2S1/AURKB/PBK/ATR/POLD3/MMP9/METTL3/BMF/POLD1/MYC/XPC/PIK3R1	16	1.30081
GO:0007098	BP	GO:0007098	centrosome cycle	17/605	138/18870	2.10E-06	4.13E-05	3.07E-05	CDK1/STIL/CHEK1/AURKA/NEK2/KIF11/PLK4/NDC80/CDK2/BRCA1/CCP110/CENPJ/BRCA2/CCNF/RANBP1/CKAP5/SAC3D1	17	1.23188
GO:0006979	BP	GO:0006979	response to oxidative stress	32/605	400/18870	2.16E-06	4.24E-05	3.15E-05	CDK1/PCNA/FANCC/EZH2/ECT2/DHFR/PARP1/FANCD2/GCH1/HDAC2/PSIP1/APOD/EIF2S1/STAT1/PRDX4/NDUFA6/MMP9/EPAS1/IL1A/MYB/BNIP3/GCLC/TACR1/CRYAB/ATM/GPX3/HBB/NR4A2/MET/RAD52/GCLM/CD38	32	0.8
GO:0031023	BP	GO:0031023	microtubule organizing center organization	18/605	154/18870	2.28E-06	4.45E-05	3.31E-05	CDK1/STIL/CHEK1/AURKA/NEK2/KIF11/PLK4/NDC80/CDK2/BRCA1/CCP110/CENPJ/BRCA2/CCNF/RANBP1/CKAP5/BCL2L10/SAC3D1	18	1.16883
GO:0010165	BP	GO:0010165	response to X-ray	8/605	29/18870	2.52E-06	4.91E-05	3.64E-05	BLM/BRCA2/XRCC4/MSH2/XRCC6/ATM/NUCKS1/CCND2	8	2.75862
GO:0051177	BP	GO:0051177	meiotic sister chromatid cohesion	6/605	14/18870	2.55E-06	4.95E-05	3.68E-05	BUB1B/RAD51C/SMC1A/BUB1/RAD21/SMC3	6	4.28571
GO:0072332	BP	GO:0072332	intrinsic apoptotic signaling pathway by p53 class mediator	13/605	84/18870	2.58E-06	4.97E-05	3.69E-05	IFI16/E2F1/E2F2/BRCA2/DYRK2/BAX/HIPK2/MSH2/PHLDA3/TP73/CHEK2/MYC/PMAIP1	13	1.54762
GO:0051315	BP	GO:0051315	attachment of mitotic spindle microtubules to kinetochore	7/605	21/18870	2.64E-06	5.08E-05	3.77E-05	NUF2/NDC80/KIF2C/CENPE/BIRC5/CDCA8/AURKB	7	3.33333
GO:0010950	BP	GO:0010950	positive regulation of endopeptidase activity	18/605	156/18870	2.75E-06	5.26E-05	3.90E-05	IFI16/CASP2/BID/BAX/CASP8/SMAD3/F3/TNFSF10/RIPK2/CRADD/APAF1/CASP8AP2/PIDD1/ROBO1/SYK/BCL2L10/MYC/PMAIP1	18	1.15385
GO:0032481	BP	GO:0032481	positive regulation of type I interferon production	12/605	72/18870	2.80E-06	5.34E-05	3.97E-05	HMGB2/G3BP1/POLR3C/CD14/STAT1/RIPK2/MMP12/TLR4/TLR2/SYK/IRF5/IRF7	12	1.66667
GO:0006289	BP	GO:0006289	nucleotide-excision repair	13/605	85/18870	2.96E-06	5.61E-05	4.17E-05	BRIP1/RPA3/FANCC/RPA1/BRCA2/RPA2/POLD3/POLE/POLR2I/MNAT1/POLD1/RAD52/XPC	13	1.52941
GO:0030330	BP	GO:0030330	DNA damage response, signal transduction by p53 class mediator	12/605	73/18870	3.26E-06	6.16E-05	4.58E-05	E2F7/FOXM1/CASP2/BRCA2/ATR/CRADD/HIPK2/PIDD1/PAXIP1/CHEK2/ATM/PMAIP1	12	1.64384
GO:0034508	BP	GO:0034508	centromere complex assembly	8/605	30/18870	3.34E-06	6.29E-05	4.67E-05	DLGAP5/CENPF/CENPE/CENPW/CENPA/HJURP/RB1/NASP	8	2.66667
GO:0008625	BP	GO:0008625	extrinsic apoptotic signaling pathway via death domain receptors	13/605	86/18870	3.38E-06	6.34E-05	4.71E-05	BRCA1/HMGB2/STK3/BID/STK4/BAX/CASP8/CRADD/CASP8AP2/PIDD1/ATF3/PMAIP1/PIK3R1	13	1.51163
GO:0071459	BP	GO:0071459	protein localization to chromosome, centromeric region	9/605	40/18870	3.79E-06	7.08E-05	5.26E-05	ZWILCH/CDK1/TTK/BUB1B/BUB3/CENPA/RB1/AURKB/ZW10	9	2.25
GO:0034501	BP	GO:0034501	protein localization to kinetochore	6/605	15/18870	4.14E-06	7.67E-05	5.70E-05	ZWILCH/CDK1/TTK/BUB3/AURKB/ZW10	6	4
GO:1903083	BP	GO:1903083	protein localization to condensed chromosome	6/605	15/18870	4.14E-06	7.67E-05	5.70E-05	ZWILCH/CDK1/TTK/BUB3/AURKB/ZW10	6	4
GO:0071621	BP	GO:0071621	granulocyte chemotaxis	16/605	130/18870	4.21E-06	7.77E-05	5.77E-05	DPP4/C3AR1/FCER1G/PTK2/CXCL8/EDN3/CXCL9/EDN2/CCL4/SYK/CXCL1/CXCL10/CCL22/CCL18/CXCL11/CXCR2	16	1.23077
GO:0010822	BP	GO:0010822	positive regulation of mitochondrion organization	12/605	75/18870	4.37E-06	8.03E-05	5.96E-05	AURKA/BID/BAX/BCL2L11/TNFSF10/MMP9/PLAUR/BNIP3/BMF/MLLT11/GZMB/PMAIP1	12	1.6
GO:0001892	BP	GO:0001892	embryonic placenta development	13/605	88/18870	4.40E-06	8.05E-05	5.98E-05	E2F8/PLK4/E2F7/STK3/SP3/STK4/CASP8/EPAS1/LEF1/ASCL2/MED1/HEY2/GATA2	13	1.47727
GO:2000278	BP	GO:2000278	regulation of DNA biosynthetic process	15/605	117/18870	5.04E-06	9.18E-05	6.82E-05	RFC3/CHEK1/NEK2/DSCC1/PCNA/USP1/CCNA2/RFC4/AURKB/ATR/PIF1/TFDP1/ATM/MYC/RFC2	15	1.28205
GO:0071216	BP	GO:0071216	cellular response to biotic stimulus	24/605	265/18870	5.10E-06	9.25E-05	6.87E-05	SMC1A/HMGB2/CD86/CD14/CMPK2/RIPK2/CDA/MMP9/APAF1/TLR4/IL1A/TLR2/CD274/PRKCA/CXCL8/CSF3/SLC7A5/CXCL9/SYK/CXCL1/CDK4/CXCL10/AHR/CXCL11	24	0.90566
GO:0045639	BP	GO:0045639	positive regulation of myeloid cell differentiation	14/605	103/18870	5.19E-06	9.39E-05	6.97E-05	HMGB2/RB1/CASP8/STAT1/PRKDC/PRKCA/CSF3/LEF1/PRMT1/TNFSF11/MED1/ID2/EVI2B/GATA2	14	1.35922
GO:0045637	BP	GO:0045637	regulation of myeloid cell differentiation	21/605	213/18870	5.32E-06	9.58E-05	7.12E-05	HMGB2/RB1/LRRC17/CASP8/STAT1/TLR4/PRKDC/MYB/PRKCA/CSF3/LOX/LEF1/PRMT1/IRF7/TNFSF11/MED1/MYC/ID2/EVI2B/GATA2/PIK3R1	21	0.985915
GO:0006282	BP	GO:0006282	regulation of DNA repair	21/605	215/18870	6.16E-06	0.000110498	8.21E-05	RAD51AP1/CHEK1/DEK/RAD51/PCNA/USP1/RNF168/BRCA1/PARP1/POLQ/FOXM1/BARD1/TIMELESS/RPA2/FANCB/ATR/PRKDC/ING3/AXIN2/RAD52/BABAM1	21	0.976744
GO:0045785	BP	GO:0045785	positive regulation of cell adhesion	35/605	482/18870	6.41E-06	0.000114532	8.51E-05	DPP4/CHST4/STK4/FOXA1/CD86/SMAD3/RIPK2/RIN2/PLAUR/IL1A/SOX2/PRSS2/CD274/PRKCA/RASGRP1/SYK/CXCL12/SELP/LEF1/ICOS/ABL2/IL18/ATM/HLX/CHST2/PNP/TNFSF11/IL7R/PTPRC/HLA-DPA1/ABI3BP/LAMA1/CD27/CD83/HAS2	35	0.726141
GO:0006206	BP	GO:0006206	pyrimidine nucleobase metabolic process	6/605	16/18870	6.45E-06	0.000114819	8.53E-05	RRM1/TYMS/CTPS1/CDA/UMPS/DPYD	6	3.75
GO:0002200	BP	GO:0002200	somatic diversification of immune receptors	12/605	78/18870	6.66E-06	0.000118051	8.77E-05	EXO1/RNF168/HMGB2/POLQ/XRCC4/PRKDC/MLH1/MSH2/PAXIP1/LEF1/ATM/PTPRC	12	1.53846
GO:0052548	BP	GO:0052548	regulation of endopeptidase activity	25/605	288/18870	6.88E-06	0.000121635	9.03E-05	IFI16/LAMP3/CASP2/BID/BAX/CASP8/SMAD3/F3/TNFSF10/RIPK2/CRADD/MMP9/APAF1/CASP8AP2/PLAUR/SOX2/ARL6IP1/PIDD1/ROBO1/SYK/BCL2L10/MYC/SPOCK1/PMAIP1/BIRC3	25	0.868056
GO:0009162	BP	GO:0009162	deoxyribonucleoside monophosphate metabolic process	7/605	24/18870	7.24E-06	0.000126765	9.41E-05	TK1/TYMS/DUT/DCK/DGUOK/DPYD/PNP	7	2.91667
GO:0009219	BP	GO:0009219	pyrimidine deoxyribonucleotide metabolic process	7/605	24/18870	7.24E-06	0.000126765	9.41E-05	TYMS/DCTPP1/MBD4/DUT/CMPK2/DTYMK/DPYD	7	2.91667
GO:0010720	BP	GO:0010720	positive regulation of cell development	33/605	444/18870	7.26E-06	0.000126765	9.41E-05	AURKA/ASPM/RB1/HDAC2/CD86/CASP8/PRKCI/RIPK2/PRKDC/MYB/TLR2/PRKCA/RASGRP1/CXCR4/SLC7A5/ROBO1/SYK/TP73/CXCL12/LEF1/XRCC6/IL18/HLX/IL15RA/PNP/TNFSF11/IL7R/PTPRC/ID4/CD27/CD83/ID2/EVI2B	33	0.743243
GO:0000018	BP	GO:0000018	regulation of DNA recombination	16/605	136/18870	7.59E-06	0.000132106	9.81E-05	RAD51AP1/CHEK1/RAD51/BLM/PARP1/POLQ/KPNA2/TIMELESS/RPA2/FANCB/MLH1/MSH2/ING3/PAXIP1/IL7R/PTPRC	16	1.17647
GO:0097305	BP	GO:0097305	response to alcohol	23/605	254/18870	8.01E-06	0.000138874	0.000103139	CDK1/RAD51/BLM/BRCA1/PARP1/TYMS/PSMD14/HDAC2/MAOB/CD14/CASP8/SLIT3/GABBR1/CDA/CSF3/TACR1/CDK4/GOT2/AHR/DNMT3A/PTPRC/GPLD1/CD27	23	0.905512
GO:0048144	BP	GO:0048144	fibroblast proliferation	14/605	107/18870	8.16E-06	0.000140911	0.000104653	CDK1/CKS2/E2F8/CCNB1/CKS1B/CCNA2/CDC6/E2F1/BAX/EREG/ESR1/MYB/CDK4/MYC	14	1.30841
GO:0002237	BP	GO:0002237	response to molecule of bacterial origin	29/605	369/18870	9.08E-06	0.000156277	0.000116065	HMGB2/GCH1/HDAC2/CD86/MAOB/CD14/CASP8/CMPK2/RIPK2/MMP9/TLR4/IL1A/TLR2/CD274/PRKCA/CXCL8/CSF3/SLC7A5/CXCL9/SELP/CXCL1/CDK4/IRF5/CXCL10/TAP2/IFNAR1/AHR/CXCL11/IL12RB2	29	0.785908
GO:0006301	BP	GO:0006301	postreplication repair	8/605	34/18870	9.26E-06	0.000158627	0.00011781	DTL/POLE2/PCNA/USP1/BRCA1/POLD3/MSH2/POLD1	8	2.35294
GO:0010952	BP	GO:0010952	positive regulation of peptidase activity	18/605	170/18870	9.29E-06	0.000158627	0.00011781	IFI16/CASP2/BID/BAX/CASP8/SMAD3/F3/TNFSF10/RIPK2/CRADD/APAF1/CASP8AP2/PIDD1/ROBO1/SYK/BCL2L10/MYC/PMAIP1	18	1.05882
GO:0032479	BP	GO:0032479	regulation of type I interferon production	15/605	123/18870	9.37E-06	0.000158937	0.00011804	POLA1/HMGB2/G3BP1/POLR3C/NMI/CD14/STAT1/RIPK2/MMP12/REL/TLR4/TLR2/SYK/IRF5/IRF7	15	1.21951
GO:0032606	BP	GO:0032606	type I interferon production	15/605	123/18870	9.37E-06	0.000158937	0.00011804	POLA1/HMGB2/G3BP1/POLR3C/NMI/CD14/STAT1/RIPK2/MMP12/REL/TLR4/TLR2/SYK/IRF5/IRF7	15	1.21951
GO:0051782	BP	GO:0051782	negative regulation of cell division	6/605	17/18870	9.70E-06	0.000163792	0.000121646	E2F8/BLM/ASPM/E2F7/AURKB/MYC	6	3.52941
GO:0006312	BP	GO:0006312	mitotic recombination	7/605	25/18870	9.77E-06	0.000164487	0.000122162	RAD51/RAD51C/BRCA2/SMC6/MLH1/MSH2/RAD52	7	2.8
GO:0065004	BP	GO:0065004	protein-DNA complex assembly	22/605	240/18870	1.03E-05	0.000173488	0.000128847	DLGAP5/RAD51/CHAF1A/CENPF/MCM2/RAD51C/CDC45/CENPE/HMGB2/CENPW/CENPA/HJURP/RB1/CHAF1B/ASF1B/SET/ESR1/NASP/MED1/HIRA/HEY2/RAD52	22	0.916667
GO:0002262	BP	GO:0002262	myeloid cell homeostasis	18/605	173/18870	1.18E-05	0.000197786	0.000146893	RACGAP1/FANCC/HMGB2/RB1/SP3/BAX/BCL2L11/STAT1/EPAS1/HIPK2/PRKDC/MYB/LYAR/PRMT1/MED1/CXCR2/ID2/GATA2	18	1.04046
GO:2000241	BP	GO:2000241	regulation of reproductive process	20/605	207/18870	1.20E-05	0.000199536	0.000148192	RAD51AP1/CDC25A/TTK/AURKA/ASPM/CDC25C/TRIP13/FBXO5/STK3/FANCA/HDAC2/STK4/CDC20/BAX/PRDX4/METTL3/ESR1/IL1A/CDC25B/TACR1	20	0.966184
GO:0090224	BP	GO:0090224	regulation of spindle organization	9/605	46/18870	1.29E-05	0.000213426	0.000158509	STIL/BORA/SPAG5/TACC3/CENPJ/RAE1/PSRC1/TPX2/GPSM2	9	1.95652
GO:0009120	BP	GO:0009120	deoxyribonucleoside metabolic process	5/605	11/18870	1.31E-05	0.000216777	0.000160997	TK1/DGUOK/DTYMK/DPYD/PNP	5	4.54545
GO:0001889	BP	GO:0001889	liver development	16/605	142/18870	1.32E-05	0.000217527	0.000161554	AURKA/E2F8/PCNA/E2F7/EZH2/TYMS/SP3/DUT/SMAD3/CCND1/TGFA/SLC7A5/HLX/MED1/MET/FRZB	16	1.12676
GO:0042063	BP	GO:0042063	gliogenesis	27/605	338/18870	1.37E-05	0.000225662	0.000167596	CDK1/EZH2/CDKN2C/RB1/HDAC2/RRAS2/IFNGR1/PRKCI/P2RX4/METTL3/TLR4/SOX2/MYB/TLR2/PPP3R1/BNIP3/CXCR4/SLC7A5/TP73/LEF1/ASCL2/PTPRB/GPR183/CLU/ID4/NDP/ID2	27	0.798817
GO:0022409	BP	GO:0022409	positive regulation of cell-cell adhesion	26/605	322/18870	1.64E-05	0.000268354	0.000199302	DPP4/CHST4/FOXA1/CD86/RIPK2/PLAUR/IL1A/SOX2/CD274/RASGRP1/SYK/SELP/LEF1/ICOS/ABL2/IL18/HLX/CHST2/PNP/TNFSF11/IL7R/PTPRC/HLA-DPA1/CD27/CD83/HAS2	26	0.807453
GO:0002562	BP	GO:0002562	somatic diversification of immune receptors via germline recombination within a single locus	11/605	72/18870	1.72E-05	0.000278492	0.000206832	EXO1/RNF168/HMGB2/XRCC4/PRKDC/MLH1/MSH2/PAXIP1/LEF1/ATM/PTPRC	11	1.52778
GO:0016444	BP	GO:0016444	somatic cell DNA recombination	11/605	72/18870	1.72E-05	0.000278492	0.000206832	EXO1/RNF168/HMGB2/XRCC4/PRKDC/MLH1/MSH2/PAXIP1/LEF1/ATM/PTPRC	11	1.52778
GO:0061008	BP	GO:0061008	hepaticobiliary system development	16/605	145/18870	1.72E-05	0.000278492	0.000206832	AURKA/E2F8/PCNA/E2F7/EZH2/TYMS/SP3/DUT/SMAD3/CCND1/TGFA/SLC7A5/HLX/MED1/MET/FRZB	16	1.10345
GO:0045621	BP	GO:0045621	positive regulation of lymphocyte differentiation	15/605	130/18870	1.84E-05	0.00029654	0.000220236	CD86/RIPK2/PRKDC/RASGRP1/SYK/LEF1/XRCC6/IL18/HLX/IL15RA/PNP/IL7R/PTPRC/CD27/CD83	15	1.15385
GO:0043523	BP	GO:0043523	regulation of neuron apoptotic process	21/605	232/18870	1.98E-05	0.000318038	0.000236202	MYBL2/PARP1/KIF14/CASP2/BAX/BCL2L11/CASP8/CCND1/EGR1/PRKCI/RAD21/SET/PPT1/HIPK2/MYB/MSH2/GCLC/ATM/NR4A2/CLU/GCLM	21	0.905172
GO:0046651	BP	GO:0046651	lymphocyte proliferation	25/605	307/18870	2.06E-05	0.000330088	0.000245151	HELLS/CR2/HPRT1/BID/CTPS1/BAX/CD86/RIPK2/TLR4/IL1A/CD274/RASGRP1/TACR1/SYK/LEF1/CTLA4/GPR183/IL18/ATM/AHR/PNP/IL7R/PTPRC/HLA-DPA1/CD38	25	0.814332
GO:0008406	BP	GO:0008406	gonad development	21/605	233/18870	2.11E-05	0.000336933	0.000250235	BRIP1/ASPM/NUP107/RRM1/HMGB2/FANCG/CASP2/FANCA/BRCA2/BAX/BCL2L11/EREG/SLIT3/TNFSF10/PRDX4/ESR1/IL1A/NASP/MSH2/ANG/ATM	21	0.901288
GO:0090232	BP	GO:0090232	positive regulation of spindle checkpoint	5/605	12/18870	2.19E-05	0.000345705	0.00025675	NDC80/BIRC5/MAD2L1/CDCA8/AURKB	5	4.16667
GO:0090267	BP	GO:0090267	positive regulation of mitotic cell cycle spindle assembly checkpoint	5/605	12/18870	2.19E-05	0.000345705	0.00025675	NDC80/BIRC5/MAD2L1/CDCA8/AURKB	5	4.16667
GO:0090306	BP	GO:0090306	meiotic spindle assembly	5/605	12/18870	2.19E-05	0.000345705	0.00025675	AURKA/CCNB2/ASPM/NDC80/FBXO5	5	4.16667
GO:0045740	BP	GO:0045740	positive regulation of DNA replication	8/605	38/18870	2.23E-05	0.000350503	0.000260313	CDC7/CDK1/DBF4/E2F8/PCNA/E2F7/CDK2/EREG	8	2.10526
GO:0061640	BP	GO:0061640	cytoskeleton-dependent cytokinesis	14/605	117/18870	2.30E-05	0.000360733	0.000267911	NUSAP1/RACGAP1/KIF23/ANLN/STMN1/KIF4A/ECT2/KIF20B/KIF20A/BIRC5/CENPA/CDCA8/AURKB/ESPL1	14	1.19658
GO:0002520	BP	GO:0002520	immune system development	19/605	199/18870	2.33E-05	0.000363823	0.000270206	EXO1/CCNB2/RNF168/HMGB2/POLQ/XRCC4/LRRC17/BCL2L11/SMAD3/PRKDC/CD274/MLH1/MSH2/PAXIP1/LEF1/ICOS/ATM/IL7R/PTPRC	19	0.954774
GO:0002687	BP	GO:0002687	positive regulation of leukocyte migration	16/605	149/18870	2.42E-05	0.000377192	0.000280135	C3AR1/P2RX4/IL1A/PTK2/CXCL8/EDN3/EDN2/TACR1/CCL4/CXCL12/SELP/ABL2/CXCL10/ASCL2/CXCR2/PIK3R1	16	1.07383
GO:0006913	BP	GO:0006913	nucleocytoplasmic transport	26/605	330/18870	2.51E-05	0.000388188	0.000288301	CDK1/NUP205/ECT2/NUP107/CSE1L/KPNA2/STK3/NUP50/BARD1/RAE1/STK4/APOD/NUP37/SMAD3/POLA2/RANBP1/NUP98/MMP12/NUP153/PPP3R1/SYK/E2F3/RAN/MED1/DDX39A/PIK3R1	26	0.787879
GO:0051169	BP	GO:0051169	nuclear transport	26/605	330/18870	2.51E-05	0.000388188	0.000288301	CDK1/NUP205/ECT2/NUP107/CSE1L/KPNA2/STK3/NUP50/BARD1/RAE1/STK4/APOD/NUP37/SMAD3/POLA2/RANBP1/NUP98/MMP12/NUP153/PPP3R1/SYK/E2F3/RAN/MED1/DDX39A/PIK3R1	26	0.787879
GO:0045862	BP	GO:0045862	positive regulation of proteolysis	27/605	350/18870	2.56E-05	0.000393103	0.000291951	AURKA/IFI16/CASP2/BID/HDAC2/CDC20/BAX/CASP8/SMAD3/F3/TNFSF10/RIPK2/CRADD/APAF1/CASP8AP2/CLN6/PTK2/PIDD1/GCLC/ROBO1/SYK/BCL2L10/AXIN2/MYC/CLU/GPLD1/PMAIP1	27	0.771429
GO:0051298	BP	GO:0051298	centrosome duplication	11/605	75/18870	2.56E-05	0.000393103	0.000291951	STIL/PLK4/NDC80/CDK2/BRCA1/CCP110/CENPJ/BRCA2/CCNF/CKAP5/SAC3D1	11	1.46667
GO:0052547	BP	GO:0052547	regulation of peptidase activity	25/605	312/18870	2.70E-05	0.000414082	0.000307532	IFI16/LAMP3/CASP2/BID/BAX/CASP8/SMAD3/F3/TNFSF10/RIPK2/CRADD/MMP9/APAF1/CASP8AP2/PLAUR/SOX2/ARL6IP1/PIDD1/ROBO1/SYK/BCL2L10/MYC/SPOCK1/PMAIP1/BIRC3	25	0.801282
GO:0042100	BP	GO:0042100	B cell proliferation	13/605	104/18870	2.81E-05	0.000428532	0.000318264	CR2/CTPS1/BAX/TLR4/RASGRP1/LEF1/CTLA4/GPR183/ATM/AHR/IL7R/PTPRC/CD38	13	1.25
GO:1903039	BP	GO:1903039	positive regulation of leukocyte cell-cell adhesion	23/605	275/18870	2.88E-05	0.000438684	0.000325804	DPP4/CHST4/CD86/RIPK2/IL1A/CD274/RASGRP1/SYK/SELP/LEF1/ICOS/ABL2/IL18/HLX/CHST2/PNP/TNFSF11/IL7R/PTPRC/HLA-DPA1/CD27/CD83/HAS2	23	0.836364
GO:0045137	BP	GO:0045137	development of primary sexual characteristics	21/605	238/18870	2.90E-05	0.000439805	0.000326636	BRIP1/ASPM/NUP107/RRM1/HMGB2/FANCG/CASP2/FANCA/BRCA2/BAX/BCL2L11/EREG/SLIT3/TNFSF10/PRDX4/ESR1/IL1A/NASP/MSH2/ANG/ATM	21	0.882353
GO:0009410	BP	GO:0009410	response to xenobiotic stimulus	31/605	434/18870	2.96E-05	0.000447404	0.00033228	CDK1/PCNA/CENPF/TYMS/RAD54L/RB1/E2F1/CA9/HDAC2/CTPS1/MAOB/CCND1/STAT1/ATR/MCM7/UMPS/CXCR4/GCLC/TP73/LOX/CDK4/ENG/AHR/PNP/DNMT3A/MYC/GPLD1/GCLM/XPC/SLC1A2/CD38	31	0.714286
GO:0032943	BP	GO:0032943	mononuclear cell proliferation	25/605	314/18870	3.01E-05	0.000453039	0.000336465	HELLS/CR2/HPRT1/BID/CTPS1/BAX/CD86/RIPK2/TLR4/IL1A/CD274/RASGRP1/TACR1/SYK/LEF1/CTLA4/GPR183/IL18/ATM/AHR/PNP/IL7R/PTPRC/HLA-DPA1/CD38	25	0.796178
GO:0045814	BP	GO:0045814	negative regulation of gene expression, epigenetic	14/605	120/18870	3.07E-05	0.000460531	0.000342029	UHRF1/CHEK1/EZH2/HELLS/CDK2/BRCA1/SUV39H1/IFI16/RB1/DNMT1/LMNB1/HDAC2/DNMT3A/MYC	14	1.16667
GO:0010821	BP	GO:0010821	regulation of mitochondrion organization	16/605	152/18870	3.10E-05	0.000464293	0.000344823	AURKA/BID/BAX/BCL2L11/TNFSF10/MMP9/PLAUR/BNIP3/OPA1/BMF/GCLC/MLLT11/ACAA2/GZMB/CLU/PMAIP1	16	1.05263
GO:0048511	BP	GO:0048511	rhythmic process	24/605	296/18870	3.22E-05	0.000480748	0.000357044	DTL/CDK1/PCNA/EZH2/TOP2A/PARP1/SUV39H1/TYMS/CASP2/HDAC2/TIMELESS/EREG/SLIT3/EGR1/METTL3/ESR1/PRKDC/NFIL3/HOMER1/AHR/ID4/ID3/ID2/HAS2	24	0.810811
GO:0030595	BP	GO:0030595	leukocyte chemotaxis	21/605	240/18870	3.28E-05	0.000488217	0.000362592	DPP4/C3AR1/SLAMF8/FCER1G/PTK2/CXCL8/CXCR4/EDN3/CXCL9/EDN2/CCL4/SYK/CXCL12/CXCL1/CXCL10/GPR183/CCL22/CCL18/TNFSF11/CXCL11/CXCR2	21	0.875
GO:0030225	BP	GO:0030225	macrophage differentiation	10/605	64/18870	3.39E-05	0.000501205	0.000372238	PARP1/RB1/CASP8/MMP9/TLR4/TLR2/PRKCA/NDP/ID2/GATA2	10	1.5625
GO:0031100	BP	GO:0031100	animal organ regeneration	10/605	64/18870	3.39E-05	0.000501205	0.000372238	CDK1/AURKA/PCNA/CCNA2/EZH2/TYMS/CCND1/SLC7A5/CXCL12/MED1	10	1.5625
GO:2000105	BP	GO:2000105	positive regulation of DNA-templated DNA replication	5/605	13/18870	3.46E-05	0.000510262	0.000378964	CDC7/DBF4/E2F8/E2F7/CDK2	5	3.84615
GO:0000302	BP	GO:0000302	response to reactive oxygen species	19/605	205/18870	3.52E-05	0.00051661	0.000383679	CDK1/PCNA/FANCC/EZH2/ECT2/DHFR/GCH1/HDAC2/APOD/STAT1/MMP9/IL1A/MYB/BNIP3/TACR1/CRYAB/ATM/HBB/MET	19	0.926829
GO:0050673	BP	GO:0050673	epithelial cell proliferation	33/605	480/18870	3.54E-05	0.000518272	0.000384913	UHRF1/HMGB2/STK3/RB1/BID/BRCA2/STK4/BAX/EREG/SMAD3/CCND1/F3/STAT1/MMP12/TGFA/ESR1/SOX2/PRKDC/PRKCA/IGFBP5/TACR1/ROBO1/ANG/CXCL12/CDK4/GPC3/HLX/TNFSF11/MED1/MYC/ID2/GATA2/HAS2	33	0.6875
GO:0032607	BP	GO:0032607	interferon-alpha production	7/605	30/18870	3.60E-05	0.000523756	0.000388986	NMI/STAT1/RIPK2/MMP12/TLR4/IRF5/IRF7	7	2.33333
GO:0032647	BP	GO:0032647	regulation of interferon-alpha production	7/605	30/18870	3.60E-05	0.000523756	0.000388986	NMI/STAT1/RIPK2/MMP12/TLR4/IRF5/IRF7	7	2.33333
GO:0009416	BP	GO:0009416	response to light stimulus	25/605	318/18870	3.71E-05	0.000536971	0.0003988	DTL/TIPIN/CDC25A/PCNA/USP1/FEN1/PARP1/BRCA2/BAX/EIF2S1/AURKB/CCND1/PBK/ATR/POLD3/MMP9/METTL3/MSH2/BMF/POLD1/MYC/XPC/ID2/SLC1A2/PIK3R1	25	0.786164
GO:2001233	BP	GO:2001233	regulation of apoptotic signaling pathway	29/605	398/18870	3.71E-05	0.000536971	0.0003988	HELLS/BRCA1/PARP1/HMGB2/STK3/RB1/CASP2/BID/STK4/BAX/BCL2L11/TNFSF10/CRADD/MMP9/APAF1/TLR4/PLAUR/IL1A/OPA1/GCLC/CXCL12/ATF3/ACAA2/MYC/NR4A2/CLU/PTPRC/GCLM/PMAIP1	29	0.728643
GO:0090231	BP	GO:0090231	regulation of spindle checkpoint	6/605	21/18870	3.81E-05	0.00054567	0.000405261	CCNB1/NDC80/BIRC5/MAD2L1/CDCA8/AURKB	6	2.85714
GO:0090266	BP	GO:0090266	regulation of mitotic cell cycle spindle assembly checkpoint	6/605	21/18870	3.81E-05	0.00054567	0.000405261	CCNB1/NDC80/BIRC5/MAD2L1/CDCA8/AURKB	6	2.85714
GO:1903504	BP	GO:1903504	regulation of mitotic spindle checkpoint	6/605	21/18870	3.81E-05	0.00054567	0.000405261	CCNB1/NDC80/BIRC5/MAD2L1/CDCA8/AURKB	6	2.85714
GO:0048146	BP	GO:0048146	positive regulation of fibroblast proliferation	9/605	53/18870	4.24E-05	0.000605136	0.000449426	CCNB1/CCNA2/CDC6/E2F1/EREG/ESR1/MYB/CDK4/MYC	9	1.69811
GO:0051445	BP	GO:0051445	regulation of meiotic cell cycle	10/605	66/18870	4.46E-05	0.000634711	0.00047139	RAD51AP1/CDC25A/TTK/ASPM/CDC25C/TRIP13/FBXO5/CDC20/METTL3/CDC25B	10	1.51515
GO:0060236	BP	GO:0060236	regulation of mitotic spindle organization	8/605	42/18870	4.80E-05	0.000681235	0.000505943	STIL/BORA/TACC3/CENPJ/RAE1/PSRC1/TPX2/GPSM2	8	1.90476
GO:0033002	BP	GO:0033002	muscle cell proliferation	21/605	247/18870	5.00E-05	0.000707726	0.000525618	CDK1/NDC80/DSN1/DNMT1/APOD/EREG/STAT1/MMP9/TLR4/PRKDC/MYB/MNAT1/IGFBP5/TACR1/ANG/TP73/XRCC6/IL18/HBEGF/HEY2/ID2	21	0.850202
GO:0000083	BP	GO:0000083	regulation of transcription involved in G1/S transition of mitotic cell cycle	6/605	22/18870	5.10E-05	0.000715563	0.000531438	E2F7/RB1/E2F1/E2F2/TFDP1/ID2	6	2.72727
GO:0009129	BP	GO:0009129	pyrimidine nucleoside monophosphate metabolic process	6/605	22/18870	5.10E-05	0.000715563	0.000531438	TYMS/DUT/DCK/CDA/UMPS/DPYD	6	2.72727
GO:1903557	BP	GO:1903557	positive regulation of tumor necrosis factor superfamily cytokine production	13/605	110/18870	5.10E-05	0.000715563	0.000531438	HDAC2/CD86/CD14/IFNGR1/RIPK2/TLR4/IL1A/TLR2/RASGRP1/SYK/CLU/PTPRC/PIK3R1	13	1.18182
GO:0006287	BP	GO:0006287	base-excision repair, gap-filling	5/605	14/18870	5.24E-05	0.000728601	0.000541121	PCNA/FEN1/LIG1/POLE/POLD1	5	3.57143
GO:0007100	BP	GO:0007100	mitotic centrosome separation	5/605	14/18870	5.24E-05	0.000728601	0.000541121	CHEK1/AURKA/NEK2/KIF11/RANBP1	5	3.57143
GO:0045842	BP	GO:0045842	positive regulation of mitotic metaphase/anaphase transition	5/605	14/18870	5.24E-05	0.000728601	0.000541121	DLGAP5/UBE2C/RB1/CDC20/ESPL1	5	3.57143
GO:0050678	BP	GO:0050678	regulation of epithelial cell proliferation	29/605	407/18870	5.55E-05	0.000769185	0.000571262	UHRF1/HMGB2/STK3/RB1/BID/BRCA2/STK4/BAX/EREG/SMAD3/CCND1/F3/STAT1/MMP12/TGFA/SOX2/PRKDC/PRKCA/TACR1/ROBO1/ANG/CXCL12/CDK4/GPC3/HLX/MED1/MYC/GATA2/HAS2	29	0.712531
GO:0009612	BP	GO:0009612	response to mechanical stimulus	19/605	213/18870	5.94E-05	0.000819597	0.000608702	CHEK1/CASP2/CASP8/STAT1/CRADD/TLR4/CASP8AP2/PTK2/BNIP3/CXCR4/SLC2A1/GCLC/TACR1/ETV1/CXCL12/CXCL10/CHI3L1/ENG/XPC	19	0.892019
GO:0022407	BP	GO:0022407	regulation of cell-cell adhesion	33/605	493/18870	5.96E-05	0.000821194	0.000609889	DPP4/CHST4/FOXA1/CD86/RIPK2/METTL3/PLAUR/IL1A/SOX2/PTK2/CD274/PRKCA/RASGRP1/SYK/CXCL12/SELP/LEF1/ICOS/ABL2/CTLA4/ASCL2/IL18/HLX/CHST2/PNP/TNFSF11/IL7R/PTPRC/HLA-DPA1/CD27/CD83/EPCAM/HAS2	33	0.669371
GO:0032496	BP	GO:0032496	response to lipopolysaccharide	26/605	348/18870	6.14E-05	0.000843305	0.00062631	HMGB2/GCH1/HDAC2/CD86/MAOB/CD14/CASP8/CMPK2/RIPK2/MMP9/TLR4/IL1A/TLR2/CD274/PRKCA/CXCL8/CSF3/SLC7A5/CXCL9/SELP/CXCL1/CDK4/CXCL10/IFNAR1/CXCL11/IL12RB2	26	0.747126
GO:0042771	BP	GO:0042771	intrinsic apoptotic signaling pathway in response to DNA damage by p53 class mediator	8/605	44/18870	6.81E-05	0.000932423	0.000692496	IFI16/BRCA2/DYRK2/HIPK2/MSH2/PHLDA3/TP73/CHEK2	8	1.81818
GO:0001556	BP	GO:0001556	oocyte maturation	7/605	33/18870	6.95E-05	0.000948217	0.000704227	AURKA/TRIP13/FBXO5/BRCA2/EREG/CDC25B/ANG	7	2.12121
GO:0001701	BP	GO:0001701	in utero embryonic development	28/605	392/18870	7.12E-05	0.000969045	0.000719695	STIL/CHEK1/GINS1/NEK2/E2F8/CCNB1/CCNB2/PLK4/RRM2/E2F7/STK3/SP3/BRCA2/ASF1B/STK4/BCL2L11/CASP8/SMAD3/EPAS1/PALB2/NASP/MSH2/LEF1/PRMT1/ASCL2/MED1/HEY2/GATA2	28	0.714286
GO:0007292	BP	GO:0007292	female gamete generation	16/605	163/18870	7.26E-05	0.000984692	0.000731316	TTK/AURKA/CCNB2/ASPM/NDC80/TOP2A/TRIP13/FBXO5/BRCA2/EREG/METTL3/MLH1/CDC25B/ANG/ATM/BCL2L10	16	0.981595
GO:0050864	BP	GO:0050864	regulation of B cell activation	14/605	130/18870	7.47E-05	0.00101011	0.000750192	TLR4/SLAMF8/MLH1/MSH2/PAXIP1/SYK/CTLA4/GPR183/ATM/AHR/PTPRC/CD27/ID2/CD38	14	1.07692
GO:0045580	BP	GO:0045580	regulation of T cell differentiation	17/605	181/18870	7.60E-05	0.00102134	0.000758533	FANCD2/FANCA/CD86/RIPK2/METTL3/RASGRP1/SYK/LEF1/CTLA4/ASCL2/IL18/HLX/PNP/IL7R/PTPRC/CD27/CD83	17	0.939227
GO:0046631	BP	GO:0046631	alpha-beta T cell activation	17/605	181/18870	7.60E-05	0.00102134	0.000758533	CD86/RIPK2/MYB/CD3G/CD274/STAT4/ITK/CD3D/SYK/LEF1/ASCL2/GPR183/IL18/HLX/PNP/PTPRC/CD83	17	0.939227
GO:0051299	BP	GO:0051299	centrosome separation	5/605	15/18870	7.66E-05	0.00102403	0.000760534	CHEK1/AURKA/NEK2/KIF11/RANBP1	5	3.33333
GO:1902101	BP	GO:1902101	positive regulation of metaphase/anaphase transition of cell cycle	5/605	15/18870	7.66E-05	0.00102403	0.000760534	DLGAP5/UBE2C/RB1/CDC20/ESPL1	5	3.33333
GO:0030218	BP	GO:0030218	erythrocyte differentiation	14/605	131/18870	8.12E-05	0.00108247	0.000803935	RACGAP1/HMGB2/RB1/SP3/STAT1/EPAS1/HIPK2/PRKDC/MYB/LYAR/PRMT1/MED1/ID2/GATA2	14	1.0687
GO:0032727	BP	GO:0032727	positive regulation of interferon-alpha production	6/605	24/18870	8.71E-05	0.00115042	0.000854398	STAT1/RIPK2/MMP12/TLR4/IRF5/IRF7	6	2.5
GO:0060706	BP	GO:0060706	cell differentiation involved in embryonic placenta development	6/605	24/18870	8.71E-05	0.00115042	0.000854398	E2F8/PLK4/E2F7/STK3/STK4/CASP8	6	2.5
GO:2000001	BP	GO:2000001	regulation of DNA damage checkpoint	6/605	24/18870	8.71E-05	0.00115042	0.000854398	RAD51/WDR76/BRCA1/BARD1/BRCA2/RPA2	6	2.5
GO:0048872	BP	GO:0048872	homeostasis of number of cells	24/605	316/18870	9.06E-05	0.00119378	0.000886599	RACGAP1/CCNB2/FANCC/EZH2/HMGB2/RB1/SP3/BAX/BCL2L11/STAT1/EPAS1/FH/HIPK2/PRKDC/MYB/LYAR/PRMT1/GPR183/MED1/IL7R/CXCR2/ID2/PMAIP1/GATA2	24	0.759494
GO:0071219	BP	GO:0071219	cellular response to molecule of bacterial origin	20/605	239/18870	9.35E-05	0.00122817	0.00091214	HMGB2/CD86/CD14/CMPK2/RIPK2/MMP9/TLR4/IL1A/TLR2/CD274/PRKCA/CXCL8/CSF3/SLC7A5/CXCL9/CXCL1/CDK4/CXCL10/AHR/CXCL11	20	0.83682
GO:0071260	BP	GO:0071260	cellular response to mechanical stimulus	10/605	72/18870	9.54E-05	0.00124993	0.000928307	CHEK1/CASP2/CASP8/CRADD/TLR4/CASP8AP2/BNIP3/SLC2A1/GCLC/ENG	10	1.38889
GO:0030879	BP	GO:0030879	mammary gland development	14/605	133/18870	9.58E-05	0.00125109	0.000929167	BRCA2/BAX/BCL2L11/CCND1/NRG1/TGFA/UMPS/ESR1/IGFBP5/ROBO1/LEF1/TNFSF11/MED1/ID2	14	1.05263
GO:0032608	BP	GO:0032608	interferon-beta production	9/605	59/18870	0.000101299	0.00131233	0.000974651	HMGB2/POLR3C/NMI/RIPK2/REL/TLR4/TLR2/IRF5/IRF7	9	1.52542
GO:0032648	BP	GO:0032648	regulation of interferon-beta production	9/605	59/18870	0.000101299	0.00131233	0.000974651	HMGB2/POLR3C/NMI/RIPK2/REL/TLR4/TLR2/IRF5/IRF7	9	1.52542
GO:0071168	BP	GO:0071168	protein localization to chromatin	9/605	59/18870	0.000101299	0.00131233	0.000974651	ESCO2/VRK1/EZH2/PARP1/CENPA/RAD21/ESR1/MSH2/LEF1	9	1.52542
GO:0006266	BP	GO:0006266	DNA ligation	5/605	16/18870	0.000108491	0.00139766	0.00103802	RAD51/TOP2A/XRCC4/LIG1/XRCC6	5	3.125
GO:0009130	BP	GO:0009130	pyrimidine nucleoside monophosphate biosynthetic process	5/605	16/18870	0.000108491	0.00139766	0.00103802	TYMS/DUT/DCK/CDA/UMPS	5	3.125
GO:0009147	BP	GO:0009147	pyrimidine nucleoside triphosphate metabolic process	6/605	25/18870	0.00011146	0.00142792	0.0010605	TYMS/DCTPP1/DUT/CTPS1/CMPK2/DTYMK	6	2.4
GO:0019985	BP	GO:0019985	translesion synthesis	6/605	25/18870	0.00011146	0.00142792	0.0010605	DTL/POLE2/PCNA/USP1/POLD3/POLD1	6	2.4
GO:0032147	BP	GO:0032147	activation of protein kinase activity	11/605	88/18870	0.000114758	0.0014661	0.00108885	BORA/ECT2/CLSPN/KIF14/TPX2/CD86/NRG1/CCDC88A/ANG/IL18/CHI3L1	11	1.25
GO:0051098	BP	GO:0051098	regulation of binding	21/605	262/18870	0.000116265	0.00148125	0.0011001	AURKA/STMN1/HMGB2/IFI16/STK3/HJURP/RB1/E2F1/STK4/BAX/AURKB/RIPK2/MMP9/PLAUR/HIPK2/CSF3/LEF1/RAN/NUCKS1/MET/HEY2	21	0.801527
GO:0030183	BP	GO:0030183	B cell differentiation	15/605	153/18870	0.000122687	0.00155876	0.00115767	EZH2/CR2/SP3/BAX/TPD52/PRKDC/SLAMF8/MSH2/SYK/GPR183/ATM/PTPRC/CD27/ID2/PIK3R1	15	0.980392
GO:0048660	BP	GO:0048660	regulation of smooth muscle cell proliferation	16/605	171/18870	0.000128076	0.00162277	0.0012052	DNMT1/APOD/EREG/STAT1/MMP9/TLR4/PRKDC/MYB/MNAT1/IGFBP5/TACR1/ANG/XRCC6/IL18/HBEGF/ID2	16	0.935673
GO:0071222	BP	GO:0071222	cellular response to lipopolysaccharide	19/605	226/18870	0.000130673	0.00165113	0.00122627	HMGB2/CD86/CD14/CMPK2/RIPK2/MMP9/TLR4/IL1A/TLR2/CD274/PRKCA/CXCL8/CSF3/SLC7A5/CXCL9/CXCL1/CDK4/CXCL10/CXCL11	19	0.840708
GO:0045471	BP	GO:0045471	response to ethanol	13/605	121/18870	0.000137073	0.00172726	0.00128281	CDK1/TYMS/PSMD14/HDAC2/MAOB/CD14/CASP8/GABBR1/CSF3/TACR1/GOT2/DNMT3A/CD27	13	1.07438
GO:0048608	BP	GO:0048608	reproductive structure development	23/605	305/18870	0.000140217	0.00176208	0.00130867	BRIP1/ASPM/NUP107/RRM1/HMGB2/FANCG/CASP2/FANCA/BRCA2/FOXA1/BAX/BCL2L11/EREG/SLIT3/TNFSF10/PRDX4/ESR1/IL1A/NASP/MSH2/ANG/ATM/ID4	23	0.754098
GO:0045926	BP	GO:0045926	negative regulation of growth	20/605	247/18870	0.000146332	0.00183393	0.00136203	CDKN2A/BRCA1/CDKN2C/STK3/RB1/RBBP7/STK4/PSRC1/SMAD3/SLIT3/CDA/PPT1/SPP1/IGFBP5/TP73/CRYAB/GPC3/PLAC8/FRZB/BST2	20	0.809717
GO:0032760	BP	GO:0032760	positive regulation of tumor necrosis factor production	12/605	106/18870	0.000149405	0.00184549	0.00137062	HDAC2/CD14/IFNGR1/RIPK2/TLR4/IL1A/TLR2/RASGRP1/SYK/CLU/PTPRC/PIK3R1	12	1.13208
GO:0007063	BP	GO:0007063	regulation of sister chromatid cohesion	5/605	17/18870	0.000149656	0.00184549	0.00137062	FEN1/BUB1/RAD21/ESPL1/AXIN2	5	2.94118
GO:0031573	BP	GO:0031573	mitotic intra-S DNA damage checkpoint signaling	5/605	17/18870	0.000149656	0.00184549	0.00137062	TIPIN/FANCD2/MSH2/CHEK2/XPC	5	2.94118
GO:0033151	BP	GO:0033151	V(D)J recombination	5/605	17/18870	0.000149656	0.00184549	0.00137062	HMGB2/XRCC4/PRKDC/LEF1/ATM	5	2.94118
GO:0051382	BP	GO:0051382	kinetochore assembly	5/605	17/18870	0.000149656	0.00184549	0.00137062	DLGAP5/CENPF/CENPE/CENPW/CENPA	5	2.94118
GO:0090399	BP	GO:0090399	replicative senescence	5/605	17/18870	0.000149656	0.00184549	0.00137062	CHEK1/CDKN2A/ATR/CHEK2/ATM	5	2.94118
GO:0051653	BP	GO:0051653	spindle localization	9/605	62/18870	0.000150173	0.00184692	0.00137168	NUSAP1/ASPM/SPAG5/NDC80/CENPA/MAD2L1/GPSM2/ZW10/ESPL1	9	1.45161
GO:0031507	BP	GO:0031507	heterochromatin formation	11/605	91/18870	0.00015562	0.00190883	0.00141766	UHRF1/EZH2/HELLS/CDK2/SUV39H1/RB1/DNMT1/LMNB1/HDAC2/DNMT3A/MYC	11	1.20879
GO:0034101	BP	GO:0034101	erythrocyte homeostasis	14/605	140/18870	0.000165974	0.00203042	0.00150797	RACGAP1/HMGB2/RB1/SP3/STAT1/EPAS1/HIPK2/PRKDC/MYB/LYAR/PRMT1/MED1/ID2/GATA2	14	1
GO:0048659	BP	GO:0048659	smooth muscle cell proliferation	16/605	175/18870	0.000167663	0.00204566	0.00151928	DNMT1/APOD/EREG/STAT1/MMP9/TLR4/PRKDC/MYB/MNAT1/IGFBP5/TACR1/ANG/XRCC6/IL18/HBEGF/ID2	16	0.914286
GO:0061458	BP	GO:0061458	reproductive system development	23/605	309/18870	0.000169861	0.00206702	0.00153514	BRIP1/ASPM/NUP107/RRM1/HMGB2/FANCG/CASP2/FANCA/BRCA2/FOXA1/BAX/BCL2L11/EREG/SLIT3/TNFSF10/PRDX4/ESR1/IL1A/NASP/MSH2/ANG/ATM/ID4	23	0.744337
GO:0002761	BP	GO:0002761	regulation of myeloid leukocyte differentiation	13/605	124/18870	0.000175611	0.00212577	0.00157877	RB1/LRRC17/CASP8/TLR4/PRKCA/LEF1/IRF7/TNFSF11/MYC/ID2/EVI2B/GATA2/PIK3R1	13	1.04839
GO:0046632	BP	GO:0046632	alpha-beta T cell differentiation	13/605	124/18870	0.000175611	0.00212577	0.00157877	CD86/RIPK2/MYB/STAT4/ITK/SYK/LEF1/ASCL2/GPR183/IL18/HLX/PNP/CD83	13	1.04839
GO:0071480	BP	GO:0071480	cellular response to gamma radiation	6/605	27/18870	0.000176403	0.00212976	0.00158174	EGR1/ATR/XRCC6/CRYAB/CHEK2/ATM	6	2.22222
GO:0034504	BP	GO:0034504	protein localization to nucleus	23/605	310/18870	0.000178089	0.00214451	0.00159269	CDK1/ECT2/NUP107/CSE1L/PARP1/KPNA2/STK3/NUP50/BARD1/LMNB1/STK4/APOD/SMAD3/POLA2/NUP98/MMP12/NUP153/PPP3R1/SYK/E2F3/RAN/MED1/PIK3R1	23	0.741935
GO:0009615	BP	GO:0009615	response to virus	29/605	436/18870	0.00018378	0.00220728	0.00163931	STMN1/IFI16/G3BP1/EIF2AK2/POLR3C/CNOT7/NMI/BAX/IFNGR1/SMAD3/STAT1/MMP12/ISG20/TLR2/BNIP3/CXCR4/CXCL9/CCL4/CXCL12/POLR3K/IRF5/IRF7/CXCL10/IFNAR1/CCL22/CLU/PTPRC/BST2/PMAIP1	29	0.665138
GO:0031055	BP	GO:0031055	chromatin remodeling at centromere	4/605	10/18870	0.000188316	0.00220995	0.0016413	CENPW/CENPA/HJURP/NASP	4	4
GO:0034080	BP	GO:0034080	CENP-A containing chromatin assembly	4/605	10/18870	0.000188316	0.00220995	0.0016413	CENPW/CENPA/HJURP/NASP	4	4
GO:0043353	BP	GO:0043353	enucleate erythrocyte differentiation	4/605	10/18870	0.000188316	0.00220995	0.0016413	RB1/SP3/MED1/ID2	4	4
GO:0051292	BP	GO:0051292	nuclear pore complex assembly	4/605	10/18870	0.000188316	0.00220995	0.0016413	NUP205/NUP107/NUP98/NUP153	4	4
GO:0060717	BP	GO:0060717	chorion development	4/605	10/18870	0.000188316	0.00220995	0.0016413	E2F8/E2F7/PAXIP1/ASCL2	4	4
GO:0070391	BP	GO:0070391	response to lipoteichoic acid	4/605	10/18870	0.000188316	0.00220995	0.0016413	CD14/RIPK2/TLR4/TLR2	4	4
GO:0071223	BP	GO:0071223	cellular response to lipoteichoic acid	4/605	10/18870	0.000188316	0.00220995	0.0016413	CD14/RIPK2/TLR4/TLR2	4	4
GO:0072203	BP	GO:0072203	cell proliferation involved in metanephros development	4/605	10/18870	0.000188316	0.00220995	0.0016413	STAT1/EGR1/GPC3/MYC	4	4
GO:1901993	BP	GO:1901993	regulation of meiotic cell cycle phase transition	4/605	10/18870	0.000188316	0.00220995	0.0016413	CDC25A/TTK/CDC25C/CDC25B	4	4
GO:2000106	BP	GO:2000106	regulation of leukocyte apoptotic process	11/605	93/18870	0.000189235	0.00221511	0.00164513	CDKN2A/BAX/BCL2L11/AURKB/CD3G/CD274/CXCL12/IRF7/IL7R/CXCR2/CD27	11	1.1828
GO:0000076	BP	GO:0000076	DNA replication checkpoint signaling	5/605	18/18870	0.000201774	0.00233228	0.00173215	TIPIN/CDC6/CLSPN/CDC45/TIMELESS	5	2.77778
GO:0006977	BP	GO:0006977	DNA damage response, signal transduction by p53 class mediator resulting in cell cycle arrest	5/605	18/18870	0.000201774	0.00233228	0.00173215	CASP2/CRADD/PIDD1/CHEK2/ATM	5	2.77778
GO:0046112	BP	GO:0046112	nucleobase biosynthetic process	5/605	18/18870	0.000201774	0.00233228	0.00173215	HPRT1/CTPS1/PAICS/UMPS/PRPS1	5	2.77778
GO:1901978	BP	GO:1901978	positive regulation of cell cycle checkpoint	5/605	18/18870	0.000201774	0.00233228	0.00173215	NDC80/BIRC5/MAD2L1/CDCA8/AURKB	5	2.77778
GO:1904666	BP	GO:1904666	regulation of ubiquitin protein ligase activity	5/605	18/18870	0.000201774	0.00233228	0.00173215	FBXO5/UBE2C/MAD2L1/CDC20/UBE2S	5	2.77778
GO:0014013	BP	GO:0014013	regulation of gliogenesis	12/605	110/18870	0.000212646	0.0024518	0.00182092	EZH2/RB1/HDAC2/PRKCI/MYB/TLR2/CXCR4/SLC7A5/TP73/ASCL2/ID4/ID2	12	1.09091
GO:1902808	BP	GO:1902808	positive regulation of cell cycle G1/S phase transition	9/605	65/18870	0.000217311	0.00249934	0.00185622	STIL/RRM2/CDC6/EZH2/RRM1/CENPJ/FAM83D/TFDP1/CCND2	9	1.38462
GO:0007159	BP	GO:0007159	leukocyte cell-cell adhesion	28/605	419/18870	0.000218716	0.00250925	0.00186358	DPP4/CHST4/CD86/RIPK2/IL1A/CD274/RASGRP1/SYK/CXCL12/SELP/LEF1/ICOS/ABL2/CTLA4/ASCL2/IL18/HLX/CHST2/PNP/CD177/TNFSF11/IL7R/PTPRC/HLA-DPA1/CD27/CD83/SELL/HAS2	28	0.668258
GO:0050921	BP	GO:0050921	positive regulation of chemotaxis	14/605	145/18870	0.000240073	0.00274064	0.00203543	C3AR1/SMAD3/F3/P2RX4/PTK2/CXCL8/CXCR4/EDN3/EDN2/CCL4/CXCL12/CXCL10/MET/CXCR2	14	0.965517
GO:2001235	BP	GO:2001235	positive regulation of apoptotic signaling pathway	14/605	145/18870	0.000240073	0.00274064	0.00203543	STK3/CASP2/BID/STK4/BAX/BCL2L11/TNFSF10/CRADD/APAF1/TLR4/ATF3/MYC/PTPRC/PMAIP1	14	0.965517
GO:0032728	BP	GO:0032728	positive regulation of interferon-beta production	7/605	40/18870	0.000249697	0.00283306	0.00210407	HMGB2/POLR3C/RIPK2/TLR4/TLR2/IRF5/IRF7	7	1.75
GO:0040001	BP	GO:0040001	establishment of mitotic spindle localization	7/605	40/18870	0.000249697	0.00283306	0.00210407	NUSAP1/NDC80/CENPA/MAD2L1/GPSM2/ZW10/ESPL1	7	1.75
GO:1901293	BP	GO:1901293	nucleoside phosphate biosynthetic process	22/605	297/18870	0.000250012	0.00283306	0.00210407	RRM2/TK1/PARP1/RRM1/TYMS/HPRT1/LDHC/DUT/DCK/DGUOK/CTPS1/CMPK2/PAICS/CDA/NDUFA6/DTYMK/UMPS/PPT1/PRPS1/NDUFA7/SDHB/PNP	22	0.740741
GO:0051053	BP	GO:0051053	negative regulation of DNA metabolic process	14/605	146/18870	0.000257893	0.00291217	0.00216282	TIPIN/CHEK1/BLM/CDC6/FBXO5/PARP1/POLQ/TIMELESS/FANCB/ATR/PIF1/MLH1/MSH2/ATM	14	0.958904
GO:0010833	BP	GO:0010833	telomere maintenance via telomere lengthening	10/605	81/18870	0.000258256	0.00291217	0.00216282	NEK2/RAD51/DCLRE1B/PARP1/RPA1/AURKB/TNKS1BP1/ATR/PIF1/ATM	10	1.23457
GO:0007129	BP	GO:0007129	homologous chromosome pairing at meiosis	8/605	53/18870	0.000264513	0.00296821	0.00220444	BRIP1/CCNE2/TRIP13/PSMC3IP/FANCD2/CCNE1/MND1/MLH1	8	1.50943
GO:2001238	BP	GO:2001238	positive regulation of extrinsic apoptotic signaling pathway	8/605	53/18870	0.000264513	0.00296821	0.00220444	STK3/BID/STK4/TNFSF10/TLR4/ATF3/PTPRC/PMAIP1	8	1.50943
GO:0045064	BP	GO:0045064	T-helper 2 cell differentiation	5/605	19/18870	0.00026665	0.00298492	0.00221686	CD86/MYB/ASCL2/IL18/HLX	5	2.63158
GO:0097421	BP	GO:0097421	liver regeneration	6/605	29/18870	0.000268065	0.0029935	0.00222323	AURKA/PCNA/EZH2/TYMS/CCND1/SLC7A5	6	2.06897
GO:1903037	BP	GO:1903037	regulation of leukocyte cell-cell adhesion	26/605	382/18870	0.000273877	0.00305102	0.00226595	DPP4/CHST4/CD86/RIPK2/IL1A/CD274/RASGRP1/SYK/CXCL12/SELP/LEF1/ICOS/ABL2/CTLA4/ASCL2/IL18/HLX/CHST2/PNP/TNFSF11/IL7R/PTPRC/HLA-DPA1/CD27/CD83/HAS2	26	0.680628
GO:0045088	BP	GO:0045088	regulation of innate immune response	28/605	425/18870	0.000275809	0.00306514	0.00227643	PARP1/HMGB2/IFI16/EIF2AK2/POLR3C/CNOT7/NMI/CD14/CASP8/AURKB/EREG/RIPK2/MMP12/METTL3/TLR4/ESR1/PRKDC/TLR2/SLAMF8/OTULIN/LYAR/RASGRP1/SYK/IRF7/XRCC6/MED1/BIRC3/PIK3R1	28	0.658824
GO:0060759	BP	GO:0060759	regulation of response to cytokine stimulus	16/605	183/18870	0.000279718	0.0031011	0.00230314	CNOT7/CASP8/SLIT3/RIPK2/MMP12/METTL3/TLR4/TSLP/TLR2/OTULIN/CXCR4/ROBO1/SYK/IRF7/MED1/PTPRC	16	0.874317
GO:0048304	BP	GO:0048304	positive regulation of isotype switching to IgG isotypes	4/605	11/18870	0.000288431	0.00315973	0.00234668	MLH1/MSH2/PAXIP1/PTPRC	4	3.63636
GO:0051987	BP	GO:0051987	positive regulation of attachment of spindle microtubules to kinetochore	4/605	11/18870	0.000288431	0.00315973	0.00234668	CCNB1/BIRC5/CDCA8/AURKB	4	3.63636
GO:0071481	BP	GO:0071481	cellular response to X-ray	4/605	11/18870	0.000288431	0.00315973	0.00234668	XRCC6/ATM/NUCKS1/CCND2	4	3.63636
GO:0085020	BP	GO:0085020	protein K6-linked ubiquitination	4/605	11/18870	0.000288431	0.00315973	0.00234668	BRCA1/UBE2T/BARD1/UBE2S	4	3.63636
GO:1902412	BP	GO:1902412	regulation of mitotic cytokinesis	4/605	11/18870	0.000288431	0.00315973	0.00234668	KIF20B/BIRC5/CDCA8/AURKB	4	3.63636
GO:0002274	BP	GO:0002274	myeloid leukocyte activation	19/605	241/18870	0.000298665	0.00326408	0.00242418	NMI/IFNGR1/TLR4/TSLP/TLR2/FCER1G/CXCL8/RASGRP1/EDN2/SYK/CD200/IL18/ATM/CD177/CLU/LCP2/PTPRC/CXCR2/GATA2	19	0.788382
GO:0048661	BP	GO:0048661	positive regulation of smooth muscle cell proliferation	11/605	98/18870	0.000301158	0.00327242	0.00243037	DNMT1/EREG/STAT1/MMP9/TLR4/MYB/MNAT1/IGFBP5/IL18/HBEGF/ID2	11	1.12245
GO:0002366	BP	GO:0002366	leukocyte activation involved in immune response	22/605	301/18870	0.000301196	0.00327242	0.00243037	EXO1/RNF168/NMI/CD86/RIPK2/TLR4/MYB/FCER1G/STAT4/RASGRP1/MLH1/MSH2/PAXIP1/SYK/LEF1/ASCL2/GPR183/IL18/HLX/CD177/PTPRC/GATA2	22	0.730897
GO:0070665	BP	GO:0070665	positive regulation of leukocyte proliferation	15/605	166/18870	0.000301556	0.00327242	0.00243037	CD86/RIPK2/TLR4/IL1A/PTK2/CD274/TACR1/SYK/GPR183/IL18/PNP/PTPRC/HLA-DPA1/BST2/CD38	15	0.903614
GO:0016445	BP	GO:0016445	somatic diversification of immunoglobulins	9/605	68/18870	0.000307675	0.00333098	0.00247387	EXO1/RNF168/POLQ/XRCC4/PRKDC/MLH1/MSH2/PAXIP1/PTPRC	9	1.32353
GO:0007623	BP	GO:0007623	circadian rhythm	17/605	204/18870	0.000322254	0.00348065	0.00258502	CDK1/EZH2/TOP2A/PARP1/SUV39H1/TYMS/HDAC2/TIMELESS/EGR1/METTL3/PRKDC/NFIL3/HOMER1/AHR/ID4/ID3/ID2	17	0.833333
GO:0050777	BP	GO:0050777	negative regulation of immune response	17/605	205/18870	0.000341197	0.00367508	0.00272943	PARP1/IFI16/CR2/CNOT7/NMI/AURKB/MMP12/METTL3/PRKDC/SLAMF8/LYAR/SYK/ASCL2/HLX/AHR/IL7R/PTPRC	17	0.829268
GO:0032733	BP	GO:0032733	positive regulation of interleukin-10 production	7/605	42/18870	0.000341849	0.00367508	0.00272943	RAD21/TLR4/TSLP/TLR2/CD274/SYK/CD83	7	1.66667
GO:0060749	BP	GO:0060749	mammary gland alveolus development	5/605	20/18870	0.000346211	0.00370469	0.00275142	CCND1/TGFA/ESR1/TNFSF11/ID2	5	2.5
GO:0061377	BP	GO:0061377	mammary gland lobule development	5/605	20/18870	0.000346211	0.00370469	0.00275142	CCND1/TGFA/ESR1/TNFSF11/ID2	5	2.5
GO:0002292	BP	GO:0002292	T cell differentiation involved in immune response	10/605	84/18870	0.000348407	0.00371956	0.00276246	CD86/RIPK2/MYB/FCER1G/STAT4/LEF1/ASCL2/GPR183/IL18/HLX	10	1.19048
GO:0045582	BP	GO:0045582	positive regulation of T cell differentiation	12/605	116/18870	0.000349526	0.00372289	0.00276494	CD86/RIPK2/RASGRP1/SYK/LEF1/IL18/HLX/PNP/IL7R/PTPRC/CD27/CD83	12	1.03448
GO:2000779	BP	GO:2000779	regulation of double-strand break repair	13/605	133/18870	0.000351741	0.00373786	0.00277605	RAD51AP1/CHEK1/DEK/RAD51/PARP1/POLQ/FOXM1/TIMELESS/RPA2/FANCB/ATR/PRKDC/ING3	13	0.977444
GO:0071496	BP	GO:0071496	cellular response to external stimulus	24/605	346/18870	0.000353543	0.00374837	0.00278386	BRIP1/CHEK1/SUV39H1/DCTPP1/IFI16/CASP2/EIF2AK2/EIF2S1/CASP8/CDA/CRADD/TLR4/CASP8AP2/BNIP3/SLC2A1/SLC7A5/GCLC/ATF3/ENG/MED1/NR4A2/PTPRC/PMAIP1/SLC1A2	24	0.693642
GO:0098727	BP	GO:0098727	maintenance of cell number	16/605	187/18870	0.000356774	0.00377395	0.00280285	ASPM/FANCC/EZH2/SMC1A/FANCD2/HDAC2/RBBP7/MTF2/METTL3/SOX2/BRMS1L/SAP30/ASCL2/MYC/SMC3/GATA2	16	0.855615
GO:0070828	BP	GO:0070828	heterochromatin organization	11/605	100/18870	0.000359389	0.00379291	0.00281694	UHRF1/EZH2/HELLS/CDK2/SUV39H1/RB1/DNMT1/LMNB1/HDAC2/DNMT3A/MYC	11	1.1
GO:0002263	BP	GO:0002263	cell activation involved in immune response	22/605	305/18870	0.00036136	0.003805	0.00282592	EXO1/RNF168/NMI/CD86/RIPK2/TLR4/MYB/FCER1G/STAT4/RASGRP1/MLH1/MSH2/PAXIP1/SYK/LEF1/ASCL2/GPR183/IL18/HLX/CD177/PTPRC/GATA2	22	0.721311
GO:0031109	BP	GO:0031109	microtubule polymerization or depolymerization	13/605	134/18870	0.000378374	0.00397509	0.00295224	STMN1/KIF2C/FBXO5/CENPJ/MZT1/PSRC1/TPX2/KIF18B/CKAP5/KIF2A/CRYAB/TUBG1/MET	13	0.970149
GO:0071674	BP	GO:0071674	mononuclear cell migration	17/605	207/18870	0.000381991	0.00400396	0.00297368	C3AR1/APOD/SLAMF8/PTK2/CXCR4/CCL4/CXCL12/ABL2/CXCL10/CD200/ASCL2/GPR183/CCL22/CCL18/TNFSF11/CXCL11/CXCR2	17	0.821256
GO:0008585	BP	GO:0008585	female gonad development	11/605	101/18870	0.00039188	0.0040983	0.00304375	NUP107/FANCG/CASP2/FANCA/BRCA2/BAX/EREG/SLIT3/ESR1/ANG/ATM	11	1.08911
GO:1902110	BP	GO:1902110	positive regulation of mitochondrial membrane permeability involved in apoptotic process	7/605	43/18870	0.000397171	0.00414424	0.00307786	BID/BAX/BCL2L11/BNIP3/GCLC/ACAA2/GZMB	7	1.62791
GO:0016446	BP	GO:0016446	somatic hypermutation of immunoglobulin genes	4/605	12/18870	0.000421703	0.00437055	0.00324594	EXO1/POLQ/MLH1/MSH2	4	3.33333
GO:0034085	BP	GO:0034085	establishment of sister chromatid cohesion	4/605	12/18870	0.000421703	0.00437055	0.00324594	SMC1A/STAG1/RAD21/SMC3	4	3.33333
GO:0045628	BP	GO:0045628	regulation of T-helper 2 cell differentiation	4/605	12/18870	0.000421703	0.00437055	0.00324594	CD86/ASCL2/IL18/HLX	4	3.33333
GO:0007548	BP	GO:0007548	sex differentiation	21/605	288/18870	0.000422768	0.00437177	0.00324685	BRIP1/ASPM/NUP107/RRM1/HMGB2/FANCG/CASP2/FANCA/BRCA2/BAX/BCL2L11/EREG/SLIT3/TNFSF10/PRDX4/ESR1/IL1A/NASP/MSH2/ANG/ATM	21	0.729167
GO:0045911	BP	GO:0045911	positive regulation of DNA recombination	9/605	71/18870	0.000427072	0.00440639	0.00327256	RAD51AP1/PARP1/TIMELESS/FANCB/MLH1/MSH2/ING3/PAXIP1/PTPRC	9	1.26761
GO:0072594	BP	GO:0072594	establishment of protein localization to organelle	29/605	459/18870	0.000430479	0.00443162	0.0032913	CDK1/ECT2/NUP107/CSE1L/KPNA2/STK3/NUP50/LAMP3/BID/BRCA2/STK4/TIMM9/APOD/BAX/SMAD3/POLA2/NUP98/MMP12/TIMM17A/NUP153/PPP3R1/SYK/E2F3/RAN/MED1/GZMB/CLU/NDP/PIK3R1	29	0.631808
GO:0051293	BP	GO:0051293	establishment of spindle localization	8/605	57/18870	0.000440792	0.00452504	0.00336068	NUSAP1/SPAG5/NDC80/CENPA/MAD2L1/GPSM2/ZW10/ESPL1	8	1.40351
GO:0040029	BP	GO:0040029	epigenetic regulation of gene expression	18/605	229/18870	0.000442285	0.00452504	0.00336068	UHRF1/CHEK1/EZH2/HELLS/CDK2/RNF168/BRCA1/SUV39H1/IFI16/RB1/DNMT1/LMNB1/HDAC2/MTF2/METTL3/HIPK2/DNMT3A/MYC	18	0.786026
GO:0097284	BP	GO:0097284	hepatocyte apoptotic process	5/605	21/18870	0.000442496	0.00452504	0.00336068	STK3/RB1/BID/STK4/DNMT3A	5	2.38095
GO:0050870	BP	GO:0050870	positive regulation of T cell activation	19/605	251/18870	0.000495654	0.00505742	0.00375607	DPP4/CD86/RIPK2/IL1A/CD274/RASGRP1/SYK/LEF1/ICOS/ABL2/IL18/HLX/PNP/TNFSF11/IL7R/PTPRC/HLA-DPA1/CD27/CD83	19	0.756972
GO:0071887	BP	GO:0071887	leukocyte apoptotic process	12/605	121/18870	0.000514697	0.00524014	0.00389177	CDKN2A/BAX/BCL2L11/AURKB/CD3G/CD274/CXCL12/IRF7/CHEK2/IL7R/CXCR2/CD27	12	0.991736
GO:0050920	BP	GO:0050920	regulation of chemotaxis	18/605	232/18870	0.000516386	0.00524576	0.00389594	DPP4/C3AR1/SMAD3/F3/P2RX4/SLAMF8/PTK2/CXCL8/CXCR4/EDN3/EDN2/CCL4/ROBO1/CXCL12/CXCL10/GPR183/MET/CXCR2	18	0.775862
GO:0010569	BP	GO:0010569	regulation of double-strand break repair via homologous recombination	9/605	73/18870	0.000526069	0.00532068	0.00395159	RAD51AP1/CHEK1/RAD51/PARP1/POLQ/TIMELESS/RPA2/FANCB/ING3	9	1.23288
GO:0042093	BP	GO:0042093	T-helper cell differentiation	9/605	73/18870	0.000526069	0.00532068	0.00395159	CD86/RIPK2/MYB/STAT4/LEF1/ASCL2/GPR183/IL18/HLX	9	1.23288
GO:1902686	BP	GO:1902686	mitochondrial outer membrane permeabilization involved in programmed cell death	7/605	45/18870	0.000529211	0.00534075	0.00396649	BID/BAX/BCL2L11/BNIP3/GCLC/ACAA2/GZMB	7	1.55556
GO:0002285	BP	GO:0002285	lymphocyte activation involved in immune response	17/605	213/18870	0.000530655	0.00534363	0.00396863	EXO1/RNF168/CD86/RIPK2/TLR4/MYB/FCER1G/STAT4/MLH1/MSH2/PAXIP1/LEF1/ASCL2/GPR183/IL18/HLX/PTPRC	17	0.798122
GO:0046545	BP	GO:0046545	development of primary female sexual characteristics	11/605	105/18870	0.000547574	0.00550198	0.00408624	NUP107/FANCG/CASP2/FANCA/BRCA2/BAX/EREG/SLIT3/ESR1/ANG/ATM	11	1.04762
GO:0048145	BP	GO:0048145	regulation of fibroblast proliferation	10/605	89/18870	0.000556293	0.00557744	0.00414228	CCNB1/CCNA2/CDC6/E2F1/BAX/EREG/ESR1/MYB/CDK4/MYC	10	1.1236
GO:0009161	BP	GO:0009161	ribonucleoside monophosphate metabolic process	8/605	59/18870	0.000559288	0.00558319	0.00414655	HPRT1/DCK/PAICS/CDA/UMPS/PRPS1/DPYD/PNP	8	1.35593
GO:0010718	BP	GO:0010718	positive regulation of epithelial to mesenchymal transition	8/605	59/18870	0.000559288	0.00558319	0.00414655	EZH2/HDAC2/SMAD3/PTK2/LEF1/ENG/AXIN2/OLFM1	8	1.35593
GO:0045648	BP	GO:0045648	positive regulation of erythrocyte differentiation	6/605	33/18870	0.000560592	0.00558412	0.00414725	HMGB2/STAT1/PRKDC/PRMT1/MED1/GATA2	6	1.81818
GO:0048469	BP	GO:0048469	cell maturation	16/605	195/18870	0.000567023	0.00563601	0.00418578	AURKA/TRIP13/FBXO5/KIF14/TYMS/RB1/AKR1B1/BRCA2/FOXA1/EREG/EPAS1/CDC25B/ANG/FAM20C/NR4A2/GATA2	16	0.820513
GO:0070555	BP	GO:0070555	response to interleukin-1	13/605	140/18870	0.000576894	0.0057204	0.00424845	EGR1/PRKCI/RIPK2/RPS6KA5/PRKCA/CXCL8/GCLC/CCL4/CHI3L1/CCL22/CCL18/HAS2/CD38	13	0.928571
GO:0009165	BP	GO:0009165	nucleotide biosynthetic process	21/605	295/18870	0.000579234	0.0057204	0.00424845	RRM2/PARP1/RRM1/TYMS/HPRT1/LDHC/DUT/DCK/DGUOK/CTPS1/CMPK2/PAICS/CDA/NDUFA6/DTYMK/UMPS/PPT1/PRPS1/NDUFA7/SDHB/PNP	21	0.711864
GO:0018105	BP	GO:0018105	peptidyl-serine phosphorylation	21/605	295/18870	0.000579234	0.0057204	0.00424845	CDC7/CDK1/TTK/AURKA/VRK1/CDK2/CLSPN/STK4/DYRK2/BAX/PRKCI/PBK/TNKS1BP1/RIPK2/ATR/RPS6KA5/HIPK2/PRKDC/PRKCA/CSF3/ATM	21	0.711864
GO:0002566	BP	GO:0002566	somatic diversification of immune receptors via somatic mutation	4/605	13/18870	0.000593735	0.00582619	0.00432702	EXO1/POLQ/MLH1/MSH2	4	3.07692
GO:0090235	BP	GO:0090235	regulation of metaphase plate congression	4/605	13/18870	0.000593735	0.00582619	0.00432702	SPAG5/BIRC5/CDCA8/AURKB	4	3.07692
GO:1903867	BP	GO:1903867	extraembryonic membrane development	4/605	13/18870	0.000593735	0.00582619	0.00432702	E2F8/E2F7/PAXIP1/ASCL2	4	3.07692
GO:0034599	BP	GO:0034599	cellular response to oxidative stress	19/605	255/18870	0.000601446	0.00588932	0.00437391	CDK1/PCNA/FANCC/EZH2/ECT2/DHFR/PARP1/FANCD2/GCH1/HDAC2/EIF2S1/MMP9/EPAS1/MYB/BNIP3/ATM/NR4A2/MET/RAD52	19	0.745098
GO:0032892	BP	GO:0032892	positive regulation of organic acid transport	7/605	46/18870	0.00060718	0.00593287	0.00440626	GABBR1/P2RX4/IL1A/ARL6IP1/SLC38A1/SLC7A5/TNFSF11	7	1.52174
GO:0062197	BP	GO:0062197	cellular response to chemical stress	22/605	317/18870	0.000609408	0.00594062	0.00441201	CDK1/PCNA/FANCC/EZH2/ECT2/DHFR/PARP1/FANCD2/GCH1/AKR1B1/HDAC2/EIF2S1/MMP9/EPAS1/MYB/BNIP3/SLC2A1/XRCC6/ATM/NR4A2/MET/RAD52	22	0.694006
GO:0050863	BP	GO:0050863	regulation of T cell activation	25/605	381/18870	0.00061055	0.00594062	0.00441201	FANCD2/FANCA/DPP4/BID/CD86/RIPK2/METTL3/IL1A/CD274/RASGRP1/SYK/LEF1/ICOS/ABL2/CTLA4/ASCL2/IL18/HLX/PNP/TNFSF11/IL7R/PTPRC/HLA-DPA1/CD27/CD83	25	0.656168
GO:0002294	BP	GO:0002294	CD4-positive, alpha-beta T cell differentiation involved in immune response	9/605	75/18870	0.000643136	0.00624451	0.0046377	CD86/RIPK2/MYB/STAT4/LEF1/ASCL2/GPR183/IL18/HLX	9	1.2
GO:0022412	BP	GO:0022412	cellular process involved in reproduction in multicellular organism	29/605	471/18870	0.000650621	0.00630392	0.00468183	BRIP1/TTK/AURKA/CCNB2/ASPM/FANCC/NDC80/TOP2A/TRIP13/FBXO5/RAD51C/HMGB2/FANCG/FANCA/BRCA2/BAX/EREG/PSME4/SLIT3/PRDX4/METTL3/MLH1/MSH2/CDC25B/ANG/RAN/ATM/DNMT3A/CCNA1	29	0.615711
GO:0034764	BP	GO:0034764	positive regulation of transmembrane transport	17/605	217/18870	0.000655354	0.00633647	0.004706	SCN1B/BAX/PRKCI/COX17/P2RX4/ARL6IP1/PPP3R1/SLC38A1/EDN3/SLC7A5/CXCL9/GLRX/CXCL10/GPC3/CXCL11/SLC1A2/PIK3R1	17	0.78341
GO:0001649	BP	GO:0001649	osteoblast differentiation	19/605	257/18870	0.000661287	0.00637863	0.00473731	FBXO5/RRAS2/SMAD3/GABBR1/TWIST2/SOX2/CTHRC1/SPP1/PTK2/CLEC5A/IGFBP5/LOX/LEF1/FAM20C/AXIN2/HIRA/TPM4/ID4/ID3	19	0.7393
GO:0032743	BP	GO:0032743	positive regulation of interleukin-2 production	6/605	34/18870	0.000662481	0.00637863	0.00473731	CD86/RIPK2/IL1A/PNP/PTPRC/CD83	6	1.76471
GO:0045824	BP	GO:0045824	negative regulation of innate immune response	10/605	91/18870	0.000664105	0.00638095	0.00473903	PARP1/IFI16/CNOT7/NMI/AURKB/MMP12/METTL3/PRKDC/SLAMF8/LYAR	10	1.0989
GO:0051090	BP	GO:0051090	regulation of DNA-binding transcription factor activity	26/605	406/18870	0.000687644	0.00659338	0.0048968	CDKN2A/STK3/RB1/EIF2AK2/HDAC2/FOXA1/SMAD3/PRKCI/RIPK2/RPS6KA5/TLR4/ESR1/HIPK2/TFDP1/TLR2/OTULIN/PIDD1/CSF3/PAXIP1/SYK/CD200/IL18/TNFSF11/CLU/ID3/ID2	26	0.640394
GO:0006959	BP	GO:0006959	humoral immune response	19/605	258/18870	0.000693086	0.00661304	0.0049114	EXO1/HMGN2/CR2/C1QB/TSLP/PRSS2/CFD/CXCL8/CXCL9/LYZ/ANG/CXCL1/CXCL10/GPR183/CXCL14/CXCL11/CLU/PTPRC/CD83	19	0.736434
GO:0045063	BP	GO:0045063	T-helper 1 cell differentiation	5/605	23/18870	0.000693915	0.00661304	0.0049114	RIPK2/STAT4/LEF1/ASCL2/HLX	5	2.17391
GO:0035794	BP	GO:0035794	positive regulation of mitochondrial membrane permeability	7/605	47/18870	0.000693996	0.00661304	0.0049114	BID/BAX/BCL2L11/BNIP3/GCLC/ACAA2/GZMB	7	1.48936
GO:0051236	BP	GO:0051236	establishment of RNA localization	14/605	161/18870	0.000696443	0.00662267	0.00491856	NUP205/NUP107/NUP50/SLBP/RAE1/NUP37/CKAP5/NUP98/ATR/NUP153/UPF3B/RAN/ATM/DDX39A	14	0.869565
GO:0046902	BP	GO:0046902	regulation of mitochondrial membrane permeability	8/605	61/18870	0.000702294	0.00665088	0.00493951	BID/BAX/BCL2L11/BNIP3/GCLC/ACAA2/GZMB/PMAIP1	8	1.31148
GO:0048599	BP	GO:0048599	oocyte development	8/605	61/18870	0.000702294	0.00665088	0.00493951	AURKA/TRIP13/FBXO5/BRCA2/EREG/CDC25B/ANG/ATM	8	1.31148
GO:0046777	BP	GO:0046777	protein autophosphorylation	16/605	199/18870	0.000707012	0.00667503	0.00495745	AURKA/NEK2/VRK1/MELK/EIF2AK2/STK4/AURKB/TNKS1BP1/ATR/PTK2/CHEK2/ATM/ENG/FAM20C/PTPRC/ERRFI1	16	0.80402
GO:0002287	BP	GO:0002287	alpha-beta T cell activation involved in immune response	9/605	76/18870	0.000709186	0.00667503	0.00495745	CD86/RIPK2/MYB/STAT4/LEF1/ASCL2/GPR183/IL18/HLX	9	1.18421
GO:0002293	BP	GO:0002293	alpha-beta T cell differentiation involved in immune response	9/605	76/18870	0.000709186	0.00667503	0.00495745	CD86/RIPK2/MYB/STAT4/LEF1/ASCL2/GPR183/IL18/HLX	9	1.18421
GO:2001252	BP	GO:2001252	positive regulation of chromosome organization	11/605	109/18870	0.000751819	0.00704589	0.00523288	CDK1/NEK2/SMC2/FEN1/CDK2/SMC4/BUB1/AURKB/ATR/RAD21/ATM	11	1.00917
GO:0006997	BP	GO:0006997	nucleus organization	13/605	144/18870	0.000753171	0.00704589	0.00523288	CDK1/CHEK1/VRK1/NUP205/NUP107/SUV39H1/HMGB2/LMNB1/PSME4/NUP98/HIPK2/NUP153/PRKCA	13	0.902778
GO:1904019	BP	GO:1904019	epithelial cell apoptotic process	13/605	144/18870	0.000753171	0.00704589	0.00523288	STK3/RB1/E2F1/BID/E2F2/STK4/BAX/EIF2S1/PRKCI/ESR1/LEF1/DNMT3A/GATA2	13	0.902778
GO:0009156	BP	GO:0009156	ribonucleoside monophosphate biosynthetic process	6/605	35/18870	0.000778139	0.00723544	0.00537365	HPRT1/DCK/PAICS/CDA/UMPS/PRPS1	6	1.71429
GO:0032633	BP	GO:0032633	interleukin-4 production	6/605	35/18870	0.000778139	0.00723544	0.00537365	CD86/FCER1G/SLC7A5/SYK/LEF1/CD83	6	1.71429
GO:0032673	BP	GO:0032673	regulation of interleukin-4 production	6/605	35/18870	0.000778139	0.00723544	0.00537365	CD86/FCER1G/SLC7A5/SYK/LEF1/CD83	6	1.71429
GO:0043367	BP	GO:0043367	CD4-positive, alpha-beta T cell differentiation	10/605	93/18870	0.000788599	0.00730484	0.0054252	CD86/RIPK2/MYB/STAT4/LEF1/ASCL2/GPR183/IL18/HLX/CD83	10	1.07527
GO:0016032	BP	GO:0016032	viral process	27/605	432/18870	0.000789681	0.00730484	0.0054252	CDK1/DEK/TOP2A/IFI16/KPNA2/LAMP3/CR2/EIF2AK2/DPP4/CNOT7/CD86/SMC6/STAT1/ISG20/NUP153/CXCL8/CXCR4/CLEC5A/SIVA1/CCL4/LEF1/PRMT1/RAN/IRF7/NUCKS1/ANPEP/BST2	27	0.625
GO:0042088	BP	GO:0042088	T-helper 1 type immune response	7/605	48/18870	0.000790355	0.00730484	0.0054252	RIPK2/TLR4/STAT4/LEF1/ASCL2/IL18/HLX	7	1.45833
GO:0051099	BP	GO:0051099	positive regulation of binding	12/605	127/18870	0.000795188	0.00733481	0.00544745	STMN1/HMGB2/STK3/RB1/STK4/RIPK2/MMP9/PLAUR/HIPK2/CSF3/RAN/MET	12	0.944882
GO:0050671	BP	GO:0050671	positive regulation of lymphocyte proliferation	13/605	145/18870	0.000803703	0.00739856	0.0054948	CD86/RIPK2/TLR4/IL1A/CD274/TACR1/SYK/GPR183/IL18/PNP/PTPRC/HLA-DPA1/CD38	13	0.896552
GO:0000722	BP	GO:0000722	telomere maintenance via recombination	4/605	14/18870	0.00081025	0.00739858	0.00549482	RAD51/RAD51C/BRCA2/SMC6	4	2.85714
GO:0001833	BP	GO:0001833	inner cell mass cell proliferation	4/605	14/18870	0.00081025	0.00739858	0.00549482	CHEK1/GINS1/BRCA2/PALB2	4	2.85714
GO:0003222	BP	GO:0003222	ventricular trabecula myocardium morphogenesis	4/605	14/18870	0.00081025	0.00739858	0.00549482	NRG1/ENG/MED1/HEY2	4	2.85714
GO:1902043	BP	GO:1902043	positive regulation of extrinsic apoptotic signaling pathway via death domain receptors	4/605	14/18870	0.00081025	0.00739858	0.00549482	STK3/STK4/ATF3/PMAIP1	4	2.85714
GO:0048477	BP	GO:0048477	oogenesis	11/605	110/18870	0.000811727	0.00739858	0.00549482	AURKA/ASPM/TRIP13/FBXO5/BRCA2/EREG/METTL3/MLH1/CDC25B/ANG/ATM	11	1
GO:0019827	BP	GO:0019827	stem cell population maintenance	15/605	183/18870	0.000842526	0.00766416	0.00569205	ASPM/FANCC/SMC1A/FANCD2/HDAC2/RBBP7/MTF2/METTL3/SOX2/BRMS1L/SAP30/ASCL2/MYC/SMC3/GATA2	15	0.819672
GO:0002070	BP	GO:0002070	epithelial cell maturation	5/605	24/18870	0.000853615	0.00773452	0.00574431	TYMS/AKR1B1/FOXA1/EPAS1/GATA2	5	2.08333
GO:0035162	BP	GO:0035162	embryonic hemopoiesis	5/605	24/18870	0.000853615	0.00773452	0.00574431	STK3/STK4/MED1/FLT3LG/GATA2	5	2.08333
GO:0016447	BP	GO:0016447	somatic recombination of immunoglobulin gene segments	8/605	63/18870	0.000873369	0.007898	0.00586572	EXO1/RNF168/XRCC4/PRKDC/MLH1/MSH2/PAXIP1/PTPRC	8	1.26984
GO:1902108	BP	GO:1902108	regulation of mitochondrial membrane permeability involved in apoptotic process	7/605	49/18870	0.00089698	0.00809564	0.00601251	BID/BAX/BCL2L11/BNIP3/GCLC/ACAA2/GZMB	7	1.42857
GO:0051091	BP	GO:0051091	positive regulation of DNA-binding transcription factor activity	18/605	244/18870	0.000929959	0.0083769	0.0062214	STK3/EIF2AK2/FOXA1/SMAD3/PRKCI/RIPK2/RPS6KA5/TLR4/ESR1/HIPK2/TFDP1/TLR2/PIDD1/CSF3/CD200/IL18/TNFSF11/CLU	18	0.737705
GO:0032946	BP	GO:0032946	positive regulation of mononuclear cell proliferation	13/605	148/18870	0.000972698	0.0087448	0.00649463	CD86/RIPK2/TLR4/IL1A/CD274/TACR1/SYK/GPR183/IL18/PNP/PTPRC/HLA-DPA1/CD38	13	0.878378
GO:0045739	BP	GO:0045739	positive regulation of DNA repair	12/605	130/18870	0.000977481	0.0087707	0.00651387	RAD51AP1/PCNA/USP1/RNF168/BRCA1/PARP1/FOXM1/TIMELESS/FANCB/PRKDC/ING3/BABAM1	12	0.923077
GO:0018209	BP	GO:0018209	peptidyl-serine modification	21/605	308/18870	0.0010059	0.00900821	0.00669026	CDC7/CDK1/TTK/AURKA/VRK1/CDK2/CLSPN/STK4/DYRK2/BAX/PRKCI/PBK/TNKS1BP1/RIPK2/ATR/RPS6KA5/HIPK2/PRKDC/PRKCA/CSF3/ATM	21	0.681818
GO:0032355	BP	GO:0032355	response to estradiol	11/605	113/18870	0.00101566	0.00907791	0.00674203	PCNA/CCNA2/EZH2/MBD4/FOXA1/CASP8/ESR1/TACR1/CRYAB/DNMT3A/CD38	11	0.973451
GO:0001779	BP	GO:0001779	natural killer cell differentiation	5/605	25/18870	0.00103915	0.00921649	0.00684495	SP3/RASGRP1/NFIL3/IL15RA/PTPRC	5	2
GO:0008156	BP	GO:0008156	negative regulation of DNA replication	5/605	25/18870	0.00103915	0.00921649	0.00684495	TIPIN/CDC6/FBXO5/TIMELESS/ATR	5	2
GO:0045649	BP	GO:0045649	regulation of macrophage differentiation	5/605	25/18870	0.00103915	0.00921649	0.00684495	RB1/CASP8/PRKCA/ID2/GATA2	5	2
GO:0046629	BP	GO:0046629	gamma-delta T cell activation	5/605	25/18870	0.00103915	0.00921649	0.00684495	CD3G/ITK/SYK/LEF1/PTPRC	5	2
GO:0070663	BP	GO:0070663	regulation of leukocyte proliferation	19/605	267/18870	0.00104365	0.00923859	0.00686136	BID/CD86/RIPK2/TLR4/IL1A/PTK2/CD274/TACR1/SYK/CTLA4/GPR183/IL18/ATM/AHR/PNP/PTPRC/HLA-DPA1/BST2/CD38	19	0.71161
GO:0097345	BP	GO:0097345	mitochondrial outer membrane permeabilization	6/605	37/18870	0.00105567	0.00932711	0.00692711	BID/BAX/BNIP3/GCLC/ACAA2/GZMB	6	1.62162
GO:0009994	BP	GO:0009994	oocyte differentiation	8/605	65/18870	0.00107635	0.00942555	0.00700022	AURKA/TRIP13/FBXO5/BRCA2/EREG/CDC25B/ANG/ATM	8	1.23077
GO:0006999	BP	GO:0006999	nuclear pore organization	4/605	15/18870	0.00107703	0.00942555	0.00700022	NUP205/NUP107/NUP98/NUP153	4	2.66667
GO:0033599	BP	GO:0033599	regulation of mammary gland epithelial cell proliferation	4/605	15/18870	0.00107703	0.00942555	0.00700022	BRCA2/BAX/CCND1/ROBO1	4	2.66667
GO:0043101	BP	GO:0043101	purine-containing compound salvage	4/605	15/18870	0.00107703	0.00942555	0.00700022	HPRT1/DCK/DGUOK/PNP	4	2.66667
GO:0048302	BP	GO:0048302	regulation of isotype switching to IgG isotypes	4/605	15/18870	0.00107703	0.00942555	0.00700022	MLH1/MSH2/PAXIP1/PTPRC	4	2.66667
GO:0008584	BP	GO:0008584	male gonad development	13/605	150/18870	0.00110113	0.00961816	0.00714327	BRIP1/ASPM/RRM1/HMGB2/FANCA/BAX/BCL2L11/TNFSF10/PRDX4/ESR1/IL1A/NASP/MSH2	13	0.866667
GO:0030324	BP	GO:0030324	lung development	15/605	188/18870	0.00110861	0.00966524	0.00717823	SP3/TIMELESS/FOXA1/MMP12/EPAS1/HIPK2/PPP3R1/IGFBP5/EDN2/TP73/LOX/GPC3/CHI3L1/LAMA1/ERRFI1	15	0.797872
GO:1901654	BP	GO:1901654	response to ketone	16/605	208/18870	0.001133	0.00985878	0.00732197	PCNA/PARP1/TYMS/CA9/MAOB/SLIT3/CDA/TLR2/SPP1/NASP/TACR1/CDK4/AHR/AXIN2/PTPRC/CD38	16	0.769231
GO:0007163	BP	GO:0007163	establishment or maintenance of cell polarity	17/605	228/18870	0.00113509	0.00985878	0.00732197	SPAG5/NDC80/KIF2C/KIF20B/CENPA/MAD2L1/GPSM2/WEE1/PRKCI/CKAP5/ZW10/CD3G/PTK2/CCL4/CAP2/ABL2/LAMA1	17	0.745614
GO:1905710	BP	GO:1905710	positive regulation of membrane permeability	7/605	51/18870	0.00114406	0.00991806	0.00736599	BID/BAX/BCL2L11/BNIP3/GCLC/ACAA2/GZMB	7	1.37255
GO:0046546	BP	GO:0046546	development of primary male sexual characteristics	13/605	151/18870	0.00117047	0.0101279	0.00752187	BRIP1/ASPM/RRM1/HMGB2/FANCA/BAX/BCL2L11/TNFSF10/PRDX4/ESR1/IL1A/NASP/MSH2	13	0.860927
GO:0061180	BP	GO:0061180	mammary gland epithelium development	8/605	66/18870	0.00119107	0.0102867	0.00763978	BRCA2/BAX/CCND1/ESR1/ROBO1/TNFSF11/MED1/ID2	8	1.21212
GO:0002244	BP	GO:0002244	hematopoietic progenitor cell differentiation	12/605	133/18870	0.00119327	0.0102867	0.00763978	ESCO2/ANLN/TOP2A/SP3/EIF2AK2/NUDT21/METTL3/PRKDC/MYB/MED1/PTPRC/GATA2	12	0.902256
GO:0060562	BP	GO:0060562	epithelial tube morphogenesis	22/605	334/18870	0.00120743	0.0103893	0.00771599	STIL/KIF20B/STK3/TIMELESS/STK4/FOXA1/SMAD3/APAF1/ESR1/CTHRC1/PPP3R1/CXCR4/OPA1/LEF1/CXCL10/GPC3/ENG/MED1/MYC/MET/LAMA1/CXCR2	22	0.658683
GO:1901657	BP	GO:1901657	glycosyl compound metabolic process	9/605	82/18870	0.0012314	0.0105758	0.00785451	TK1/HPRT1/AKR1B1/GUSB/DGUOK/CDA/DTYMK/DPYD/PNP	9	1.09756
GO:0006760	BP	GO:0006760	folic acid-containing compound metabolic process	5/605	26/18870	0.001253	0.010725	0.00796527	DHFR/MTHFD2/TYMS/GCH1/MTRR	5	1.92308
GO:0001959	BP	GO:0001959	regulation of cytokine-mediated signaling pathway	14/605	171/18870	0.00125342	0.010725	0.00796527	CNOT7/CASP8/SLIT3/RIPK2/MMP12/METTL3/TSLP/OTULIN/CXCR4/ROBO1/SYK/IRF7/MED1/PTPRC	14	0.818713
GO:0046638	BP	GO:0046638	positive regulation of alpha-beta T cell differentiation	7/605	52/18870	0.00128609	0.0109639	0.00814272	CD86/RIPK2/SYK/IL18/HLX/PNP/CD83	7	1.34615
GO:1900087	BP	GO:1900087	positive regulation of G1/S transition of mitotic cell cycle	7/605	52/18870	0.00128609	0.0109639	0.00814272	STIL/RRM2/CDC6/RRM1/CENPJ/TFDP1/CCND2	7	1.34615
GO:0071706	BP	GO:0071706	tumor necrosis factor superfamily cytokine production	15/605	191/18870	0.00129991	0.0110409	0.0081999	HDAC2/CD86/CD14/IFNGR1/RIPK2/RAD21/TLR4/IL1A/TLR2/CD274/RASGRP1/SYK/CLU/PTPRC/PIK3R1	15	0.78534
GO:1903555	BP	GO:1903555	regulation of tumor necrosis factor superfamily cytokine production	15/605	191/18870	0.00129991	0.0110409	0.0081999	HDAC2/CD86/CD14/IFNGR1/RIPK2/RAD21/TLR4/IL1A/TLR2/CD274/RASGRP1/SYK/CLU/PTPRC/PIK3R1	15	0.78534
GO:0002460	BP	GO:0002460	adaptive immune response based on somatic recombination of immune receptors built from immunoglobulin superfamily domains	24/605	380/18870	0.00131356	0.0111309	0.00826675	EXO1/RNF168/CR2/HPRT1/RIPK2/C1QB/TLR4/FCER1G/CD274/STAT4/MLH1/MSH2/PAXIP1/LEF1/IRF7/TAP2/ASCL2/IL18/HLX/AHR/CLU/IL7R/PTPRC/CD27	24	0.631579
GO:0060760	BP	GO:0060760	positive regulation of response to cytokine stimulus	8/605	67/18870	0.00131534	0.0111309	0.00826675	RIPK2/MMP12/TLR4/TSLP/TLR2/CXCR4/IRF7/MED1	8	1.19403
GO:0061844	BP	GO:0061844	antimicrobial humoral immune response mediated by antimicrobial peptide	9/605	83/18870	0.00134275	0.0113214	0.00840821	HMGN2/TSLP/CXCL8/CXCL9/ANG/CXCL1/CXCL10/CXCL14/CXCL11	9	1.08434
GO:1902117	BP	GO:1902117	positive regulation of organelle assembly	9/605	83/18870	0.00134275	0.0113214	0.00840821	STIL/PLK4/SPAG5/CCP110/CENPJ/G3BP1/GPSM2/CCDC88A/CNOT6L	9	1.08434
GO:0030323	BP	GO:0030323	respiratory tube development	15/605	192/18870	0.00136954	0.0115262	0.00856031	SP3/TIMELESS/FOXA1/MMP12/EPAS1/HIPK2/PPP3R1/IGFBP5/EDN2/TP73/LOX/GPC3/CHI3L1/LAMA1/ERRFI1	15	0.78125
GO:0009173	BP	GO:0009173	pyrimidine ribonucleoside monophosphate metabolic process	4/605	16/18870	0.00139988	0.0116606	0.00866019	DCK/CDA/UMPS/DPYD	4	2.5
GO:0034349	BP	GO:0034349	glial cell apoptotic process	4/605	16/18870	0.00139988	0.0116606	0.00866019	RB1/PRKCI/RAD21/PRKCA	4	2.5
GO:0045651	BP	GO:0045651	positive regulation of macrophage differentiation	4/605	16/18870	0.00139988	0.0116606	0.00866019	RB1/CASP8/PRKCA/ID2	4	2.5
GO:0046653	BP	GO:0046653	tetrahydrofolate metabolic process	4/605	16/18870	0.00139988	0.0116606	0.00866019	DHFR/MTHFD2/TYMS/GCH1	4	2.5
GO:0048291	BP	GO:0048291	isotype switching to IgG isotypes	4/605	16/18870	0.00139988	0.0116606	0.00866019	MLH1/MSH2/PAXIP1/PTPRC	4	2.5
GO:0034614	BP	GO:0034614	cellular response to reactive oxygen species	13/605	154/18870	0.00140069	0.0116606	0.00866019	CDK1/PCNA/FANCC/EZH2/ECT2/DHFR/GCH1/HDAC2/MMP9/MYB/BNIP3/ATM/MET	13	0.844156
GO:0050871	BP	GO:0050871	positive regulation of B cell activation	9/605	84/18870	0.00146208	0.0121497	0.00902342	TLR4/MLH1/MSH2/PAXIP1/SYK/GPR183/PTPRC/CD27/CD38	9	1.07143
GO:0042542	BP	GO:0042542	response to hydrogen peroxide	10/605	101/18870	0.00149341	0.0123878	0.00920023	CDK1/PCNA/EZH2/ECT2/HDAC2/STAT1/MYB/BNIP3/CRYAB/HBB	10	0.990099
GO:0060541	BP	GO:0060541	respiratory system development	16/605	214/18870	0.001524	0.0126188	0.00937179	SP3/TIMELESS/FOXA1/MMP12/EPAS1/HIPK2/PPP3R1/IGFBP5/EDN2/TP73/LOX/LEF1/GPC3/CHI3L1/LAMA1/ERRFI1	16	0.747664
GO:0030900	BP	GO:0030900	forebrain development	25/605	407/18870	0.0015456	0.0127747	0.00948759	STIL/ASPM/EZH2/KIF14/RRM1/TRA2B/TACC3/E2F1/HPRT1/BAX/APAF1/METTL3/SOX2/BNIP3/CXCR4/SLC2A1/ROBO1/CXCL12/LEF1/RAN/NR4A2/ID4/ID2/SLC1A2/GATA2	25	0.614251
GO:0035710	BP	GO:0035710	CD4-positive, alpha-beta T cell activation	11/605	119/18870	0.00155103	0.0127967	0.00950391	CD86/RIPK2/MYB/CD274/STAT4/LEF1/ASCL2/GPR183/IL18/HLX/CD83	11	0.92437
GO:0048568	BP	GO:0048568	embryonic organ development	27/605	453/18870	0.00158158	0.0130254	0.00967379	STIL/E2F8/PLK4/E2F7/TRA2B/STK3/SP3/STK4/CASP8/SMAD3/EPAS1/POLE/HIPK2/PALB2/CTHRC1/CXCL8/LEF1/ASCL2/HLX/ENG/MED1/HEY2/FRZB/ID3/ID2/FLT3LG/GATA2	27	0.596026
GO:0051101	BP	GO:0051101	regulation of DNA binding	9/605	85/18870	0.00158977	0.0130696	0.00970659	HMGB2/IFI16/HJURP/RB1/E2F1/MMP9/PLAUR/LEF1/HEY2	9	1.05882
GO:1901224	BP	GO:1901224	positive regulation of non-canonical NF-kappaB signal transduction	8/605	69/18870	0.00159471	0.0130868	0.0097194	EIF2AK2/NMI/CD86/TLR4/TLR2/IL18/PTP4A3/CD27	8	1.15942
GO:1901532	BP	GO:1901532	regulation of hematopoietic progenitor cell differentiation	6/605	40/18870	0.00160704	0.0131646	0.00977715	EIF2AK2/NUDT21/METTL3/PRKDC/MYB/GATA2	6	1.5
GO:0007006	BP	GO:0007006	mitochondrial membrane organization	11/605	120/18870	0.00165939	0.0135453	0.0100599	BID/IMMT/TIMM9/BAX/BCL2L11/BNIP3/OPA1/GCLC/ACAA2/GZMB/PMAIP1	11	0.916667
GO:0046660	BP	GO:0046660	female sex differentiation	11/605	120/18870	0.00165939	0.0135453	0.0100599	NUP107/FANCG/CASP2/FANCA/BRCA2/BAX/EREG/SLIT3/ESR1/ANG/ATM	11	0.916667
GO:0019058	BP	GO:0019058	viral life cycle	21/605	321/18870	0.00167912	0.0136822	0.0101615	CDK1/DEK/TOP2A/IFI16/KPNA2/LAMP3/CR2/EIF2AK2/DPP4/CNOT7/CD86/SMC6/ISG20/NUP153/CXCL8/CXCR4/CLEC5A/SIVA1/NUCKS1/ANPEP/BST2	21	0.654206
GO:0009408	BP	GO:0009408	response to heat	10/605	103/18870	0.00173247	0.014092	0.0104659	HDAC2/PSIP1/RBBP7/EIF2S1/ATR/IL1A/GCLC/CRYAB/CXCL10/ATM	10	0.970874
GO:0032886	BP	GO:0032886	regulation of microtubule-based process	18/605	258/18870	0.00174282	0.0141512	0.0105099	STIL/AURKA/BORA/PLK4/STMN1/SPAG5/BRCA1/TACC3/CENPJ/RAE1/NEFH/CCNF/PSRC1/TPX2/GPSM2/CKAP5/TACR1/MET	18	0.697674
GO:2001236	BP	GO:2001236	regulation of extrinsic apoptotic signaling pathway	13/605	158/18870	0.00176507	0.0143067	0.0106253	BRCA1/HMGB2/STK3/BID/STK4/TNFSF10/TLR4/IL1A/GCLC/ATF3/PTPRC/GCLM/PMAIP1	13	0.822785
GO:2000756	BP	GO:2000756	regulation of peptidyl-lysine acetylation	5/605	28/18870	0.00177577	0.0143682	0.010671	DEK/BRCA1/HDAC2/SET/GATA2	5	1.78571
GO:0009163	BP	GO:0009163	nucleoside biosynthetic process	4/605	17/18870	0.00178456	0.0143888	0.0106863	TK1/HPRT1/DTYMK/PNP	4	2.35294
GO:0034404	BP	GO:0034404	nucleobase-containing small molecule biosynthetic process	4/605	17/18870	0.00178456	0.0143888	0.0106863	TK1/HPRT1/DTYMK/PNP	4	2.35294
GO:0007140	BP	GO:0007140	male meiotic nuclear division	7/605	55/18870	0.00179617	0.0144319	0.0107184	TRIP13/RAD51C/FANCA/BRCA2/MLH1/ATM/CCNA1	7	1.27273
GO:0009116	BP	GO:0009116	nucleoside metabolic process	7/605	55/18870	0.00179617	0.0144319	0.0107184	TK1/HPRT1/DGUOK/CDA/DTYMK/DPYD/PNP	7	1.27273
GO:0050670	BP	GO:0050670	regulation of lymphocyte proliferation	17/605	238/18870	0.00180294	0.0144611	0.0107401	BID/CD86/RIPK2/TLR4/IL1A/CD274/TACR1/SYK/CTLA4/GPR183/IL18/ATM/AHR/PNP/PTPRC/HLA-DPA1/CD38	17	0.714286
GO:1902742	BP	GO:1902742	apoptotic process involved in development	6/605	41/18870	0.00183233	0.0146713	0.0108962	CHEK1/BAX/BCL2L11/SLIT3/LEF1/CRYAB	6	1.46341
GO:1901875	BP	GO:1901875	positive regulation of post-translational protein modification	13/605	159/18870	0.00186747	0.0149268	0.0110859	FANCI/DEK/BRCA1/SUV39H1/UBE2C/NMI/CDC20/EGR1/RIPK2/FANCM/UBE2S/PAXIP1/BIRC3	13	0.81761
GO:0032874	BP	GO:0032874	positive regulation of stress-activated MAPK cascade	11/605	122/18870	0.00189469	0.0151182	0.0112281	STK3/EIF2AK2/RIPK2/IGFBP6/TLR4/IL1A/HIPK2/RASGRP1/PRMT1/TNFSF11/CD27	11	0.901639
GO:0002833	BP	GO:0002833	positive regulation of response to biotic stimulus	23/605	369/18870	0.00194381	0.0154833	0.0114992	HMGB2/IFI16/EIF2AK2/POLR3C/NMI/CD14/EREG/RIPK2/MMP12/TLR4/ESR1/PRKDC/TLR2/OTULIN/CD274/PRKCA/RASGRP1/SYK/IRF7/XRCC6/MED1/BIRC3/PIK3R1	23	0.623306
GO:0043525	BP	GO:0043525	positive regulation of neuron apoptotic process	7/605	56/18870	0.00199709	0.0158803	0.0117941	MYBL2/CASP2/BAX/BCL2L11/CASP8/MYB/ATM	7	1.25
GO:0030851	BP	GO:0030851	granulocyte differentiation	6/605	42/18870	0.00208074	0.0164603	0.0122248	SP3/LBR/CSF3/LEF1/EVI2B/GATA2	6	1.42857
GO:0042119	BP	GO:0042119	neutrophil activation	6/605	42/18870	0.00208074	0.0164603	0.0122248	FCER1G/CXCL8/SYK/IL18/CD177/CXCR2	6	1.42857
GO:0051294	BP	GO:0051294	establishment of spindle orientation	6/605	42/18870	0.00208074	0.0164603	0.0122248	SPAG5/NDC80/CENPA/MAD2L1/GPSM2/ZW10	6	1.42857
GO:0009264	BP	GO:0009264	deoxyribonucleotide catabolic process	5/605	29/18870	0.00208988	0.0164688	0.0122312	DCTPP1/MBD4/DUT/DPYD/PNP	5	1.72414
GO:0046386	BP	GO:0046386	deoxyribose phosphate catabolic process	5/605	29/18870	0.00208988	0.0164688	0.0122312	DCTPP1/MBD4/DUT/DPYD/PNP	5	1.72414
GO:0014015	BP	GO:0014015	positive regulation of gliogenesis	8/605	72/18870	0.00209967	0.0164688	0.0122312	HDAC2/PRKCI/MYB/TLR2/CXCR4/SLC7A5/TP73/ID2	8	1.11111
GO:0032722	BP	GO:0032722	positive regulation of chemokine production	8/605	72/18870	0.00209967	0.0164688	0.0122312	EIF2AK2/EGR1/RIPK2/TLR4/TSLP/TLR2/SYK/IL18	8	1.11111
GO:0046635	BP	GO:0046635	positive regulation of alpha-beta T cell activation	8/605	72/18870	0.00209967	0.0164688	0.0122312	CD86/RIPK2/SYK/IL18/HLX/PNP/PTPRC/CD83	8	1.11111
GO:1901873	BP	GO:1901873	regulation of post-translational protein modification	19/605	284/18870	0.00212702	0.016655	0.0123694	FANCI/DEK/FBXO5/BRCA1/SUV39H1/UBE2C/MAD2L1/NMI/CDC20/EGR1/RIPK2/EPAS1/SET/FANCM/UBE2S/GCLC/PAXIP1/GATA2/BIRC3	19	0.669014
GO:0032944	BP	GO:0032944	regulation of mononuclear cell proliferation	17/605	242/18870	0.00214997	0.0168001	0.0124771	BID/CD86/RIPK2/TLR4/IL1A/CD274/TACR1/SYK/CTLA4/GPR183/IL18/ATM/AHR/PNP/PTPRC/HLA-DPA1/CD38	17	0.702479
GO:0070304	BP	GO:0070304	positive regulation of stress-activated protein kinase signaling cascade	11/605	124/18870	0.00215647	0.0168001	0.0124771	STK3/EIF2AK2/RIPK2/IGFBP6/TLR4/IL1A/HIPK2/RASGRP1/PRMT1/TNFSF11/CD27	11	0.887097
GO:0072676	BP	GO:0072676	lymphocyte migration	11/605	124/18870	0.00215647	0.0168001	0.0124771	APOD/CCL4/CXCL12/ABL2/CXCL10/CD200/ASCL2/GPR183/CCL22/CCL18/CXCL11	11	0.887097
GO:0006978	BP	GO:0006978	DNA damage response, signal transduction by p53 class mediator resulting in transcription of p21 class mediator	4/605	18/18870	0.00223679	0.0171363	0.0127269	FOXM1/BRCA2/HIPK2/CHEK2	4	2.22222
GO:0007096	BP	GO:0007096	regulation of exit from mitosis	4/605	18/18870	0.00223679	0.0171363	0.0127269	ANLN/CDCA5/UBE2C/ZW10	4	2.22222
GO:0016202	BP	GO:0016202	regulation of striated muscle tissue development	4/605	18/18870	0.00223679	0.0171363	0.0127269	CENPF/SMAD3/LOX/LEF1	4	2.22222
GO:0035065	BP	GO:0035065	regulation of histone acetylation	4/605	18/18870	0.00223679	0.0171363	0.0127269	DEK/BRCA1/SET/GATA2	4	2.22222
GO:0035234	BP	GO:0035234	ectopic germ cell programmed cell death	4/605	18/18870	0.00223679	0.0171363	0.0127269	CASP2/BAX/IL1A/PRKDC	4	2.22222
GO:0035455	BP	GO:0035455	response to interferon-alpha	4/605	18/18870	0.00223679	0.0171363	0.0127269	LAMP3/EIF2AK2/IFNAR1/BST2	4	2.22222
GO:0038128	BP	GO:0038128	ERBB2 signaling pathway	4/605	18/18870	0.00223679	0.0171363	0.0127269	EREG/NRG1/TGFA/HBEGF	4	2.22222
GO:0043173	BP	GO:0043173	nucleotide salvage	4/605	18/18870	0.00223679	0.0171363	0.0127269	HPRT1/DCK/DGUOK/CDA	4	2.22222
GO:0045780	BP	GO:0045780	positive regulation of bone resorption	4/605	18/18870	0.00223679	0.0171363	0.0127269	SPP1/PRKCA/SYK/TNFSF11	4	2.22222
GO:1903236	BP	GO:1903236	regulation of leukocyte tethering or rolling	4/605	18/18870	0.00223679	0.0171363	0.0127269	CHST4/CXCL12/SELP/CHST2	4	2.22222
GO:0051881	BP	GO:0051881	regulation of mitochondrial membrane potential	8/605	73/18870	0.00229334	0.0175114	0.0130055	PARP1/BID/BAX/BNIP3/GCLC/MLLT11/GCLM/PMAIP1	8	1.09589
GO:0072678	BP	GO:0072678	T cell migration	8/605	73/18870	0.00229334	0.0175114	0.0130055	APOD/CXCL12/ABL2/CXCL10/CD200/ASCL2/GPR183/CXCL11	8	1.09589
GO:1901796	BP	GO:1901796	regulation of signal transduction by p53 class mediator	10/605	107/18870	0.00230343	0.0175593	0.0130411	CHEK1/AURKA/DYRK2/AURKB/ATR/HIPK2/CHEK2/ATM/MYC/PMAIP1	10	0.934579
GO:0043524	BP	GO:0043524	negative regulation of neuron apoptotic process	13/605	163/18870	0.00232736	0.0177125	0.0131548	KIF14/BAX/CCND1/PRKCI/RAD21/SET/PPT1/HIPK2/MSH2/GCLC/NR4A2/CLU/GCLM	13	0.797546
GO:0048545	BP	GO:0048545	response to steroid hormone	21/605	330/18870	0.00234337	0.017805	0.0132235	PCNA/BRCA1/PARP1/TYMS/HMGB2/RBBP7/FOXA1/MAOB/BCL2L11/SLIT3/AGL/ESR1/TLR2/SPP1/TACR1/LOX/RAN/MED1/AXIN2/PTPRC/CD38	21	0.636364
GO:0007099	BP	GO:0007099	centriole replication	6/605	43/18870	0.00235375	0.0178251	0.0132384	STIL/PLK4/CDK2/BRCA1/CCP110/CENPJ	6	1.39535
GO:0032506	BP	GO:0032506	cytokinetic process	6/605	43/18870	0.00235375	0.0178251	0.0132384	RACGAP1/ANLN/ECT2/KIF20B/KIF20A/AURKB	6	1.39535
GO:0051262	BP	GO:0051262	protein tetramerization	9/605	90/18870	0.00236893	0.0179107	0.013302	RRM2/TK1/RRM1/STK3/HPRT1/STK4/NUDT21/TP73/HOMER1	9	1
GO:0001503	BP	GO:0001503	ossification	26/605	444/18870	0.00243849	0.0184064	0.0136702	FBXO5/SP3/RRAS2/SMAD3/GABBR1/ATP2B1/TWIST2/EBP/SOX2/CTHRC1/SPP1/PTK2/CLEC5A/IGFBP5/TACR1/LOX/LEF1/GPC3/FAM20C/TNFSF11/AXIN2/HIRA/TPM4/GPLD1/ID4/ID3	26	0.585586
GO:0000002	BP	GO:0000002	mitochondrial genome maintenance	5/605	30/18870	0.00244263	0.0184076	0.013671	PARP1/RRM1/PIF1/TOP3A/OPA1	5	1.66667
GO:0002688	BP	GO:0002688	regulation of leukocyte chemotaxis	11/605	126/18870	0.00244686	0.0184094	0.0136724	DPP4/C3AR1/SLAMF8/PTK2/CXCL8/EDN3/EDN2/CCL4/CXCL12/CXCL10/CXCR2	11	0.873016
GO:0009141	BP	GO:0009141	nucleoside triphosphate metabolic process	14/605	184/18870	0.00249413	0.0187344	0.0139138	PARP1/TYMS/DCTPP1/LDHC/DUT/DGUOK/CTPS1/CMPK2/NDUFA6/DTYMK/OPA1/RAN/NDUFA7/SDHB	14	0.76087
GO:0046637	BP	GO:0046637	regulation of alpha-beta T cell differentiation	8/605	74/18870	0.00250075	0.0187536	0.013928	CD86/RIPK2/SYK/ASCL2/IL18/HLX/PNP/CD83	8	1.08108
GO:0048863	BP	GO:0048863	stem cell differentiation	17/605	246/18870	0.00255125	0.0191013	0.0141862	EZH2/EIF2AK2/HDAC2/RBBP7/FOXA1/MTF2/NRG1/NUDT21/METTL3/ESR1/PRKDC/PHF5A/EDN3/MED1/FRZB/PTPRC/EPCAM	17	0.691057
GO:0014009	BP	GO:0014009	glial cell proliferation	7/605	59/18870	0.00270536	0.0202223	0.0150188	RB1/PRKCI/MYB/SLC7A5/ASCL2/CLU/NDP	7	1.18644
GO:0090559	BP	GO:0090559	regulation of membrane permeability	8/605	75/18870	0.00272256	0.0203179	0.0150898	BID/BAX/BCL2L11/BNIP3/GCLC/ACAA2/GZMB/PMAIP1	8	1.06667
GO:0032872	BP	GO:0032872	regulation of stress-activated MAPK cascade	14/605	186/18870	0.00275363	0.0204152	0.015162	STK3/FOXM1/EIF2AK2/PBK/RIPK2/IGFBP6/TLR4/IL1A/HIPK2/RASGRP1/PRMT1/TNFSF11/MYC/CD27	14	0.752688
GO:0007076	BP	GO:0007076	mitotic chromosome condensation	4/605	19/18870	0.00276216	0.0204152	0.015162	NUSAP1/SMC2/CDCA5/SMC4	4	2.10526
GO:0009148	BP	GO:0009148	pyrimidine nucleoside triphosphate biosynthetic process	4/605	19/18870	0.00276216	0.0204152	0.015162	TYMS/CTPS1/CMPK2/DTYMK	4	2.10526
GO:0009223	BP	GO:0009223	pyrimidine deoxyribonucleotide catabolic process	4/605	19/18870	0.00276216	0.0204152	0.015162	DCTPP1/MBD4/DUT/DPYD	4	2.10526
GO:0042772	BP	GO:0042772	DNA damage response, signal transduction resulting in transcription	4/605	19/18870	0.00276216	0.0204152	0.015162	FOXM1/BRCA2/HIPK2/CHEK2	4	2.10526
GO:0046931	BP	GO:0046931	pore complex assembly	4/605	19/18870	0.00276216	0.0204152	0.015162	NUP205/NUP107/NUP98/NUP153	4	2.10526
GO:0071456	BP	GO:0071456	cellular response to hypoxia	12/605	147/18870	0.00278738	0.0205687	0.015276	BRIP1/CCNA2/SUV39H1/EGR1/EPAS1/HIPK2/BNIP3/ACAA2/DNMT3A/MYC/NDP/PMAIP1	12	0.816327
GO:0031398	BP	GO:0031398	positive regulation of protein ubiquitination	10/605	110/18870	0.00282369	0.0207701	0.0154257	FANCI/BRCA1/UBE2C/NMI/CDC20/RIPK2/FANCM/UBE2S/PAXIP1/BIRC3	10	0.909091
GO:0042116	BP	GO:0042116	macrophage activation	10/605	110/18870	0.00282369	0.0207701	0.0154257	NMI/IFNGR1/TLR4/TLR2/EDN2/SYK/CD200/ATM/CLU/PTPRC	10	0.909091
GO:0043094	BP	GO:0043094	cellular metabolic compound salvage	5/605	31/18870	0.0028367	0.0208326	0.015472	HPRT1/DCK/DGUOK/CDA/PNP	5	1.6129
GO:0007019	BP	GO:0007019	microtubule depolymerization	6/605	45/18870	0.00297957	0.0217794	0.0161753	STMN1/KIF2C/TPX2/KIF18B/CKAP5/KIF2A	6	1.33333
GO:0002763	BP	GO:0002763	positive regulation of myeloid leukocyte differentiation	7/605	60/18870	0.0029798	0.0217794	0.0161753	RB1/CASP8/PRKCA/LEF1/TNFSF11/ID2/EVI2B	7	1.16667
GO:0070228	BP	GO:0070228	regulation of lymphocyte apoptotic process	7/605	60/18870	0.0029798	0.0217794	0.0161753	BAX/BCL2L11/AURKB/CD3G/CD274/IL7R/CD27	7	1.16667
GO:0051403	BP	GO:0051403	stress-activated MAPK cascade	16/605	230/18870	0.00315386	0.0230152	0.0170931	STK3/FOXM1/EIF2AK2/SMAD3/PBK/RIPK2/IGFBP6/TLR4/IL1A/HIPK2/RASGRP1/PRMT1/CRYAB/TNFSF11/MYC/CD27	16	0.695652
GO:0030308	BP	GO:0030308	negative regulation of cell growth	14/605	189/18870	0.00318414	0.0231581	0.0171991	CDKN2A/BRCA1/CDKN2C/RB1/RBBP7/PSRC1/SMAD3/SLIT3/CDA/PPT1/SPP1/CRYAB/FRZB/BST2	14	0.740741
GO:0070302	BP	GO:0070302	regulation of stress-activated protein kinase signaling cascade	14/605	189/18870	0.00318414	0.0231581	0.0171991	STK3/FOXM1/EIF2AK2/PBK/RIPK2/IGFBP6/TLR4/IL1A/HIPK2/RASGRP1/PRMT1/TNFSF11/MYC/CD27	14	0.740741
GO:0046785	BP	GO:0046785	microtubule polymerization	9/605	94/18870	0.0031885	0.0231581	0.0171991	STMN1/FBXO5/CENPJ/MZT1/PSRC1/TPX2/CKAP5/TUBG1/MET	9	0.957447
GO:0032729	BP	GO:0032729	positive regulation of type II interferon production	8/605	77/18870	0.00321204	0.0232286	0.0172516	CD14/RIPK2/TLR4/RASGRP1/SLC7A5/IL18/IL12RB2/HLA-DPA1	8	1.03896
GO:0032890	BP	GO:0032890	regulation of organic acid transport	8/605	77/18870	0.00321204	0.0232286	0.0172516	GABBR1/P2RX4/IL1A/ARL6IP1/SLC38A1/SLC7A5/SYK/TNFSF11	8	1.03896
GO:0043434	BP	GO:0043434	response to peptide hormone	25/605	430/18870	0.00321333	0.0232286	0.0172516	BRIP1/CCNA2/CDC6/PARP1/RB1/EREG/STAT1/TNFSF10/EGR1/PRKCI/ATP2B1/TWIST2/PRKDC/TLR2/PTK2/PRKCA/STAT4/SLC2A1/IGFBP5/GCLC/CXCL12/NUCKS1/NR4A2/GPLD1/PIK3R1	25	0.581395
GO:0010001	BP	GO:0010001	glial cell differentiation	17/605	252/18870	0.00326891	0.023414	0.0173892	CDK1/CDKN2C/HDAC2/IFNGR1/METTL3/TLR4/SOX2/TLR2/PPP3R1/BNIP3/CXCR4/TP73/LEF1/CLU/ID4/NDP/ID2	17	0.674603
GO:0009218	BP	GO:0009218	pyrimidine ribonucleotide metabolic process	5/605	32/18870	0.00327474	0.023414	0.0173892	DCK/CTPS1/CDA/UMPS/DPYD	5	1.5625
GO:0010458	BP	GO:0010458	exit from mitosis	5/605	32/18870	0.00327474	0.023414	0.0173892	ANLN/CDCA5/UBE2C/ZW10/UBE2S	5	1.5625
GO:0042558	BP	GO:0042558	pteridine-containing compound metabolic process	5/605	32/18870	0.00327474	0.023414	0.0173892	DHFR/MTHFD2/TYMS/GCH1/MTRR	5	1.5625
GO:0051642	BP	GO:0051642	centrosome localization	5/605	32/18870	0.00327474	0.023414	0.0173892	DLGAP5/AURKA/ASPM/MAD2L1/GPSM2	5	1.5625
GO:0061842	BP	GO:0061842	microtubule organizing center localization	5/605	32/18870	0.00327474	0.023414	0.0173892	DLGAP5/AURKA/ASPM/MAD2L1/GPSM2	5	1.5625
GO:0032092	BP	GO:0032092	positive regulation of protein binding	7/605	61/18870	0.00327503	0.023414	0.0173892	STK3/STK4/RIPK2/MMP9/HIPK2/CSF3/RAN	7	1.14754
GO:0009113	BP	GO:0009113	purine nucleobase biosynthetic process	3/605	10/18870	0.00332482	0.023414	0.0173892	HPRT1/PAICS/PRPS1	3	3
GO:0009170	BP	GO:0009170	purine deoxyribonucleoside monophosphate metabolic process	3/605	10/18870	0.00332482	0.023414	0.0173892	DCK/DGUOK/PNP	3	3
GO:0019852	BP	GO:0019852	L-ascorbic acid metabolic process	3/605	10/18870	0.00332482	0.023414	0.0173892	AKR1B1/SLC2A1/GCLC	3	3
GO:0034351	BP	GO:0034351	negative regulation of glial cell apoptotic process	3/605	10/18870	0.00332482	0.023414	0.0173892	PRKCI/RAD21/PRKCA	3	3
GO:0038130	BP	GO:0038130	ERBB4 signaling pathway	3/605	10/18870	0.00332482	0.023414	0.0173892	EREG/NRG1/HBEGF	3	3
GO:0044837	BP	GO:0044837	actomyosin contractile ring organization	3/605	10/18870	0.00332482	0.023414	0.0173892	RACGAP1/ANLN/ECT2	3	3
GO:0051409	BP	GO:0051409	response to nitrosative stress	3/605	10/18870	0.00332482	0.023414	0.0173892	GCLC/ATM/GCLM	3	3
GO:0070344	BP	GO:0070344	regulation of fat cell proliferation	3/605	10/18870	0.00332482	0.023414	0.0173892	E2F1/TFDP1/E2F3	3	3
GO:1901334	BP	GO:1901334	lactone metabolic process	3/605	10/18870	0.00332482	0.023414	0.0173892	AKR1B1/SLC2A1/GCLC	3	3
GO:0045646	BP	GO:0045646	regulation of erythrocyte differentiation	6/605	46/18870	0.00333543	0.023414	0.0173892	HMGB2/STAT1/PRKDC/PRMT1/MED1/GATA2	6	1.30435
GO:0140718	BP	GO:0140718	facultative heterochromatin formation	6/605	46/18870	0.00333543	0.023414	0.0173892	EZH2/HELLS/SUV39H1/DNMT1/DNMT3A/MYC	6	1.30435
GO:1902622	BP	GO:1902622	regulation of neutrophil migration	6/605	46/18870	0.00333543	0.023414	0.0173892	DPP4/C3AR1/IL1A/SLAMF8/CXCL8/CXCR2	6	1.30435
GO:0002429	BP	GO:0002429	immune response-activating cell surface receptor signaling pathway	20/605	318/18870	0.00336106	0.0234866	0.0174431	CR2/C3AR1/NMI/BAX/CD14/RIPK2/TLR4/TLR2/CD3G/FCER1G/PTK2/ITK/CD3D/SYK/CTLA4/LCP2/PTPRC/GPLD1/CD38/PIK3R1	20	0.628931
GO:0006144	BP	GO:0006144	purine nucleobase metabolic process	4/605	20/18870	0.00336614	0.0234866	0.0174431	HPRT1/PAICS/PRPS1/DPYD	4	2
GO:0032303	BP	GO:0032303	regulation of icosanoid secretion	4/605	20/18870	0.00336614	0.0234866	0.0174431	P2RX4/IL1A/SYK/TNFSF11	4	2
GO:0051900	BP	GO:0051900	regulation of mitochondrial depolarization	4/605	20/18870	0.00336614	0.0234866	0.0174431	PARP1/GCLC/MLLT11/GCLM	4	2
GO:0031099	BP	GO:0031099	regeneration	14/605	191/18870	0.00350063	0.0243881	0.0181127	CDK1/AURKA/PCNA/CCNA2/EZH2/DHFR/TYMS/APOD/CCND1/SOX2/SPP1/SLC7A5/CXCL12/MED1	14	0.732984
GO:0009266	BP	GO:0009266	response to temperature stimulus	13/605	171/18870	0.00352686	0.0245338	0.0182209	HDAC2/PSIP1/RBBP7/EIF2S1/ATR/IL1A/CXCR4/GCLC/CXCL12/CRYAB/CXCL10/ATM/PLAC8	13	0.760234
GO:1903053	BP	GO:1903053	regulation of extracellular matrix organization	7/605	62/18870	0.00359206	0.0249497	0.0185297	RB1/DPP4/SMAD3/AXIN2/COLGALT1/LAMA1/HAS2	7	1.12903
GO:0002690	BP	GO:0002690	positive regulation of leukocyte chemotaxis	9/605	96/18870	0.00367439	0.0254831	0.0189259	C3AR1/PTK2/CXCL8/EDN3/EDN2/CCL4/CXCL12/CXCL10/CXCR2	9	0.9375
GO:0045089	BP	GO:0045089	positive regulation of innate immune response	21/605	343/18870	0.00368546	0.0255215	0.0189545	HMGB2/IFI16/EIF2AK2/POLR3C/NMI/CD14/EREG/RIPK2/MMP12/TLR4/ESR1/PRKDC/TLR2/OTULIN/RASGRP1/SYK/IRF7/XRCC6/MED1/BIRC3/PIK3R1	21	0.612245
GO:0019730	BP	GO:0019730	antimicrobial humoral response	11/605	133/18870	0.00372164	0.0256205	0.019028	HMGN2/TSLP/PRSS2/CXCL8/CXCL9/LYZ/ANG/CXCL1/CXCL10/CXCL14/CXCL11	11	0.827068
GO:0030261	BP	GO:0030261	chromosome condensation	6/605	47/18870	0.00372198	0.0256205	0.019028	NUSAP1/CDK1/SMC2/CDCA5/TOP2A/SMC4	6	1.2766
GO:0051353	BP	GO:0051353	positive regulation of oxidoreductase activity	6/605	47/18870	0.00372198	0.0256205	0.019028	DHFR/GCH1/COX17/EDN3/EDN2/ABL2	6	1.2766
GO:0090102	BP	GO:0090102	cochlea development	6/605	47/18870	0.00372198	0.0256205	0.019028	CCNA2/MCM2/CTHRC1/HEY2/FRZB/GATA2	6	1.2766
GO:0072593	BP	GO:0072593	reactive oxygen species metabolic process	16/605	234/18870	0.00373302	0.0256582	0.019056	FANCC/DHFR/BRCA1/GCH1/FOXM1/MAOB/PRDX4/TLR4/BNIP3/SYK/CRYAB/GPX3/HBB/CD177/ABCB7/PMAIP1	16	0.683761
GO:0009127	BP	GO:0009127	purine nucleoside monophosphate biosynthetic process	4/605	21/18870	0.00405406	0.0278234	0.020664	HPRT1/DCK/DGUOK/PAICS	4	1.90476
GO:0007259	BP	GO:0007259	receptor signaling pathway via JAK-STAT	13/605	174/18870	0.00408918	0.0279812	0.0207812	USP1/CENPJ/CNOT7/HDAC2/NMI/STAT1/TSLP/STAT4/IFNAR1/IL18/IL15RA/IL7R/PTPRC	13	0.747126
GO:0046661	BP	GO:0046661	male sex differentiation	13/605	174/18870	0.00408918	0.0279812	0.0207812	BRIP1/ASPM/RRM1/HMGB2/FANCA/BAX/BCL2L11/TNFSF10/PRDX4/ESR1/IL1A/NASP/MSH2	13	0.747126
GO:0098534	BP	GO:0098534	centriole assembly	6/605	48/18870	0.00414078	0.0282743	0.0209989	STIL/PLK4/CDK2/BRCA1/CCP110/CENPJ	6	1.25
GO:0046634	BP	GO:0046634	regulation of alpha-beta T cell activation	10/605	116/18870	0.00414428	0.0282743	0.0209989	CD86/RIPK2/CD274/SYK/ASCL2/IL18/HLX/PNP/PTPRC/CD83	10	0.862069
GO:0007584	BP	GO:0007584	response to nutrient	12/605	155/18870	0.00428893	0.0291191	0.0216263	BRIP1/TYMS/STAT1/APAF1/AGL/IL1A/SPP1/GCLC/CXCL10/DNMT3A/MED1/GCLM	12	0.774194
GO:0000289	BP	GO:0000289	nuclear-transcribed mRNA poly(A) tail shortening	5/605	34/18870	0.00429336	0.0291191	0.0216263	CNOT7/TNKS1BP1/MLH1/CNOT10/CNOT6L	5	1.47059
GO:0043372	BP	GO:0043372	positive regulation of CD4-positive, alpha-beta T cell differentiation	5/605	34/18870	0.00429336	0.0291191	0.0216263	CD86/RIPK2/IL18/HLX/CD83	5	1.47059
GO:0050901	BP	GO:0050901	leukocyte tethering or rolling	5/605	34/18870	0.00429336	0.0291191	0.0216263	CHST4/CXCL12/SELP/CHST2/SELL	5	1.47059
GO:0001558	BP	GO:0001558	regulation of cell growth	24/605	417/18870	0.00435798	0.0294921	0.0219034	CDKN2A/BRCA1/KIF14/CDKN2C/RB1/RBBP7/PSRC1/SMAD3/SLIT3/CDA/SUPV3L1/PPT1/PRSS2/SPP1/CXCR4/IGFBP5/CXCL12/CRYAB/OLFM1/HBEGF/FRZB/BST2/SPOCK1/CD38	24	0.57554
GO:0031098	BP	GO:0031098	stress-activated protein kinase signaling cascade	16/605	238/18870	0.00439687	0.0294921	0.0219034	STK3/FOXM1/EIF2AK2/SMAD3/PBK/RIPK2/IGFBP6/TLR4/IL1A/HIPK2/RASGRP1/PRMT1/CRYAB/TNFSF11/MYC/CD27	16	0.672269
GO:0002702	BP	GO:0002702	positive regulation of production of molecular mediator of immune response	11/605	136/18870	0.00440927	0.0294921	0.0219034	CD86/RIPK2/TLR4/MLH1/MSH2/SLC7A5/PAXIP1/SYK/IRF5/IL18/PTPRC	11	0.808824
GO:0030223	BP	GO:0030223	neutrophil differentiation	3/605	11/18870	0.00446347	0.0294921	0.0219034	LBR/LEF1/EVI2B	3	2.72727
GO:0031953	BP	GO:0031953	negative regulation of protein autophosphorylation	3/605	11/18870	0.00446347	0.0294921	0.0219034	ENG/PTPRC/ERRFI1	3	2.72727
GO:0032261	BP	GO:0032261	purine nucleotide salvage	3/605	11/18870	0.00446347	0.0294921	0.0219034	HPRT1/DCK/DGUOK	3	2.72727
GO:0033148	BP	GO:0033148	positive regulation of intracellular estrogen receptor signaling pathway	3/605	11/18870	0.00446347	0.0294921	0.0219034	PARP1/FOXA1/MED1	3	2.72727
GO:0034350	BP	GO:0034350	regulation of glial cell apoptotic process	3/605	11/18870	0.00446347	0.0294921	0.0219034	PRKCI/RAD21/PRKCA	3	2.72727
GO:0042276	BP	GO:0042276	error-prone translesion synthesis	3/605	11/18870	0.00446347	0.0294921	0.0219034	POLE2/USP1/POLD3	3	2.72727
GO:0045625	BP	GO:0045625	regulation of T-helper 1 cell differentiation	3/605	11/18870	0.00446347	0.0294921	0.0219034	RIPK2/ASCL2/HLX	3	2.72727
GO:0046643	BP	GO:0046643	regulation of gamma-delta T cell activation	3/605	11/18870	0.00446347	0.0294921	0.0219034	SYK/LEF1/PTPRC	3	2.72727
GO:0070601	BP	GO:0070601	centromeric sister chromatid cohesion	3/605	11/18870	0.00446347	0.0294921	0.0219034	BUB1B/BUB1/AXIN2	3	2.72727
GO:0072711	BP	GO:0072711	cellular response to hydroxyurea	3/605	11/18870	0.00446347	0.0294921	0.0219034	RAD51/BLM/TIMELESS	3	2.72727
GO:0075733	BP	GO:0075733	intracellular transport of virus	3/605	11/18870	0.00446347	0.0294921	0.0219034	KPNA2/NUP153/BST2	3	2.72727
GO:1901984	BP	GO:1901984	negative regulation of protein acetylation	3/605	11/18870	0.00446347	0.0294921	0.0219034	BRCA1/HDAC2/SET	3	2.72727
GO:1904464	BP	GO:1904464	regulation of matrix metallopeptidase secretion	3/605	11/18870	0.00446347	0.0294921	0.0219034	TLR4/TLR2/CD200	3	2.72727
GO:1990773	BP	GO:1990773	matrix metallopeptidase secretion	3/605	11/18870	0.00446347	0.0294921	0.0219034	TLR4/TLR2/CD200	3	2.72727
GO:1990918	BP	GO:1990918	double-strand break repair involved in meiotic recombination	3/605	11/18870	0.00446347	0.0294921	0.0219034	BRIP1/RAD51/FANCD2	3	2.72727
GO:0030010	BP	GO:0030010	establishment of cell polarity	12/605	156/18870	0.00451516	0.0297484	0.0220937	SPAG5/NDC80/KIF20B/CENPA/MAD2L1/GPSM2/WEE1/PRKCI/ZW10/PTK2/ABL2/LAMA1	12	0.769231
GO:0048754	BP	GO:0048754	branching morphogenesis of an epithelial tube	12/605	156/18870	0.00451516	0.0297484	0.0220937	TIMELESS/STK4/FOXA1/ESR1/PPP3R1/LEF1/GPC3/ENG/MED1/MYC/MET/LAMA1	12	0.769231
GO:0036230	BP	GO:0036230	granulocyte activation	6/605	49/18870	0.0045934	0.0301778	0.0224126	FCER1G/CXCL8/SYK/IL18/CD177/CXCR2	6	1.22449
GO:2000404	BP	GO:2000404	regulation of T cell migration	6/605	49/18870	0.0045934	0.0301778	0.0224126	APOD/CXCL12/ABL2/CXCL10/CD200/ASCL2	6	1.22449
GO:0006403	BP	GO:0006403	RNA localization	14/605	197/18870	0.00460727	0.0302258	0.0224482	NUP205/NUP107/NUP50/SLBP/RAE1/NUP37/CKAP5/NUP98/ATR/NUP153/UPF3B/RAN/ATM/DDX39A	14	0.71066
GO:0071695	BP	GO:0071695	anatomical structure maturation	17/605	261/18870	0.00465267	0.0304803	0.0226372	AURKA/TRIP13/FBXO5/KIF14/TYMS/RB1/AKR1B1/BRCA2/FOXA1/EREG/EBP/EPAS1/CDC25B/ANG/FAM20C/NR4A2/GATA2	17	0.651341
GO:0051928	BP	GO:0051928	positive regulation of calcium ion transport	10/605	118/18870	0.00467905	0.0305127	0.0226613	BAX/P2RX4/ATP2B1/PPP3R1/CXCL9/CCL4/CXCL12/CXCL10/HOMER1/CXCL11	10	0.847458
GO:0030888	BP	GO:0030888	regulation of B cell proliferation	7/605	65/18870	0.00468409	0.0305127	0.0226613	TLR4/CTLA4/GPR183/ATM/AHR/PTPRC/CD38	7	1.07692
GO:0032613	BP	GO:0032613	interleukin-10 production	7/605	65/18870	0.00468409	0.0305127	0.0226613	RAD21/TLR4/TSLP/TLR2/CD274/SYK/CD83	7	1.07692
GO:0032653	BP	GO:0032653	regulation of interleukin-10 production	7/605	65/18870	0.00468409	0.0305127	0.0226613	RAD21/TLR4/TSLP/TLR2/CD274/SYK/CD83	7	1.07692
GO:0051341	BP	GO:0051341	regulation of oxidoreductase activity	8/605	82/18870	0.00473577	0.0307192	0.0228147	DHFR/GCH1/COX17/IL1A/SLAMF8/EDN3/EDN2/ABL2	8	0.97561
GO:0070227	BP	GO:0070227	lymphocyte apoptotic process	8/605	82/18870	0.00473577	0.0307192	0.0228147	BAX/BCL2L11/AURKB/CD3G/CD274/CHEK2/IL7R/CD27	8	0.97561
GO:0150076	BP	GO:0150076	neuroinflammatory response	8/605	82/18870	0.00473577	0.0307192	0.0228147	IFNGR1/MMP9/TLR2/CD200/IL18/ATM/CLU/PTPRC	8	0.97561
GO:0031334	BP	GO:0031334	positive regulation of protein-containing complex assembly	14/605	198/18870	0.00481658	0.03104	0.0230529	BID/PSRC1/BAX/BCL2L11/CKAP5/NRG1/ATR/TLR4/CSF3/BMF/SYK/ATM/MET/CLU	14	0.707071
GO:0018107	BP	GO:0018107	peptidyl-threonine phosphorylation	9/605	100/18870	0.00481909	0.03104	0.0230529	CDK1/CHEK1/DYRK2/TNKS1BP1/RIPK2/HIPK2/PRKDC/PRKCA/CHI3L1	9	0.9
GO:0001832	BP	GO:0001832	blastocyst growth	4/605	22/18870	0.00483104	0.03104	0.0230529	CHEK1/GINS1/BRCA2/PALB2	4	1.81818
GO:0006244	BP	GO:0006244	pyrimidine nucleotide catabolic process	4/605	22/18870	0.00483104	0.03104	0.0230529	DCTPP1/MBD4/DUT/DPYD	4	1.81818
GO:0045624	BP	GO:0045624	positive regulation of T-helper cell differentiation	4/605	22/18870	0.00483104	0.03104	0.0230529	CD86/RIPK2/IL18/HLX	4	1.81818
GO:0072111	BP	GO:0072111	cell proliferation involved in kidney development	4/605	22/18870	0.00483104	0.03104	0.0230529	STAT1/EGR1/GPC3/MYC	4	1.81818
GO:0048762	BP	GO:0048762	mesenchymal cell differentiation	17/605	262/18870	0.00483233	0.03104	0.0230529	EZH2/HDAC2/FOXA1/SMAD3/STAT1/NRG1/FAM83D/PTK2/PPP3R1/EDN3/LEF1/ENG/AXIN2/OLFM1/HEY2/FRZB/HAS2	17	0.648855
GO:0000132	BP	GO:0000132	establishment of mitotic spindle orientation	5/605	35/18870	0.00487923	0.0312542	0.023212	NDC80/CENPA/MAD2L1/GPSM2/ZW10	5	1.42857
GO:0030224	BP	GO:0030224	monocyte differentiation	5/605	35/18870	0.00487923	0.0312542	0.023212	IFI16/SP3/IRF7/MED1/MYC	5	1.42857
GO:0001837	BP	GO:0001837	epithelial to mesenchymal transition	13/605	178/18870	0.00494937	0.0316595	0.023513	EZH2/HDAC2/FOXA1/SMAD3/FAM83D/PTK2/PPP3R1/LEF1/ENG/AXIN2/OLFM1/HEY2/HAS2	13	0.730337
GO:0036294	BP	GO:0036294	cellular response to decreased oxygen levels	12/605	158/18870	0.00499624	0.0318269	0.0236374	BRIP1/CCNA2/SUV39H1/EGR1/EPAS1/HIPK2/BNIP3/ACAA2/DNMT3A/MYC/NDP/PMAIP1	12	0.759494
GO:0050657	BP	GO:0050657	nucleic acid transport	12/605	158/18870	0.00499624	0.0318269	0.0236374	NUP205/NUP107/NUP50/SLBP/RAE1/NUP37/CKAP5/NUP98/NUP153/UPF3B/RAN/DDX39A	12	0.759494
GO:0050658	BP	GO:0050658	RNA transport	12/605	158/18870	0.00499624	0.0318269	0.0236374	NUP205/NUP107/NUP50/SLBP/RAE1/NUP37/CKAP5/NUP98/NUP153/UPF3B/RAN/DDX39A	12	0.759494
GO:0006305	BP	GO:0006305	DNA alkylation	6/605	50/18870	0.00508142	0.0322114	0.0239229	EZH2/HELLS/PARP1/DNMT1/MTRR/DNMT3A	6	1.2
GO:0006306	BP	GO:0006306	DNA methylation	6/605	50/18870	0.00508142	0.0322114	0.0239229	EZH2/HELLS/PARP1/DNMT1/MTRR/DNMT3A	6	1.2
GO:1902041	BP	GO:1902041	regulation of extrinsic apoptotic signaling pathway via death domain receptors	6/605	50/18870	0.00508142	0.0322114	0.0239229	BRCA1/HMGB2/STK3/STK4/ATF3/PMAIP1	6	1.2
GO:0001756	BP	GO:0001756	somitogenesis	7/605	66/18870	0.00509851	0.0322114	0.0239229	MESP2/SMAD3/PALB2/PRKDC/LEF1/ATM/AXIN2	7	1.06061
GO:0030219	BP	GO:0030219	megakaryocyte differentiation	7/605	66/18870	0.00509851	0.0322114	0.0239229	HMGB2/SP3/MYB/LOX/PRMT1/MED1/GATA2	7	1.06061
GO:0034605	BP	GO:0034605	cellular response to heat	7/605	66/18870	0.00509851	0.0322114	0.0239229	HDAC2/RBBP7/EIF2S1/ATR/IL1A/CXCL10/ATM	7	1.06061
GO:2001234	BP	GO:2001234	negative regulation of apoptotic signaling pathway	16/605	243/18870	0.00535937	0.0338132	0.0251125	HELLS/BRCA1/HMGB2/RB1/BID/BAX/MMP9/PLAUR/IL1A/OPA1/GCLC/CXCL12/ACAA2/NR4A2/CLU/GCLM	16	0.658436
GO:0034655	BP	GO:0034655	nucleobase-containing compound catabolic process	27/605	496/18870	0.00545805	0.0343887	0.0255399	EXOSC8/FEN1/RNASEH2A/DCTPP1/MBD4/E2F1/HPRT1/DUT/CNOT7/BAX/PCBP4/TNKS1BP1/CDA/SUPV3L1/APAF1/ISG20/METTL3/UPF3B/PRKCA/MLH1/DPYD/ANG/CNOT10/ATM/PNP/AXIN2/CNOT6L	27	0.544355
GO:0048678	BP	GO:0048678	response to axon injury	8/605	84/18870	0.00548039	0.0344271	0.0255685	CDK1/DHFR/APOD/BAX/P2RX4/SPP1/BNIP3/NDP	8	0.952381
GO:0042773	BP	GO:0042773	ATP synthesis coupled electron transport	9/605	102/18870	0.00548653	0.0344271	0.0255685	CDK1/CCNB1/BID/DGUOK/COX7B/UQCR10/NDUFA6/NDUFA7/SDHB	9	0.882353
GO:0042775	BP	GO:0042775	mitochondrial ATP synthesis coupled electron transport	9/605	102/18870	0.00548653	0.0344271	0.0255685	CDK1/CCNB1/BID/DGUOK/COX7B/UQCR10/NDUFA6/NDUFA7/SDHB	9	0.882353
GO:0070301	BP	GO:0070301	cellular response to hydrogen peroxide	7/605	67/18870	0.00553988	0.0347146	0.025782	CDK1/PCNA/EZH2/ECT2/HDAC2/MYB/BNIP3	7	1.04478
GO:0016049	BP	GO:0016049	cell growth	27/605	497/18870	0.00560266	0.0350603	0.0260388	AURKA/CDKN2A/BRCA1/KIF14/CDKN2C/RB1/RBBP7/PSRC1/SMAD3/SLIT3/CDA/SUPV3L1/PPT1/PRSS2/SPP1/CXCR4/EDN3/IGFBP5/EDN2/CXCL12/CRYAB/OLFM1/HBEGF/FRZB/BST2/SPOCK1/CD38	27	0.54326
GO:0046599	BP	GO:0046599	regulation of centriole replication	4/605	23/18870	0.00570201	0.0353939	0.0262865	STIL/PLK4/BRCA1/CENPJ	4	1.73913
GO:0046794	BP	GO:0046794	transport of virus	4/605	23/18870	0.00570201	0.0353939	0.0262865	KPNA2/DPP4/NUP153/BST2	4	1.73913
GO:0048634	BP	GO:0048634	regulation of muscle organ development	4/605	23/18870	0.00570201	0.0353939	0.0262865	CENPF/SMAD3/LOX/LEF1	4	1.73913
GO:0051882	BP	GO:0051882	mitochondrial depolarization	4/605	23/18870	0.00570201	0.0353939	0.0262865	PARP1/GCLC/MLLT11/GCLM	4	1.73913
GO:0097150	BP	GO:0097150	neuronal stem cell population maintenance	4/605	23/18870	0.00570201	0.0353939	0.0262865	ASPM/FANCC/FANCD2/SOX2	4	1.73913
GO:1901659	BP	GO:1901659	glycosyl compound biosynthetic process	4/605	23/18870	0.00570201	0.0353939	0.0262865	TK1/HPRT1/DTYMK/PNP	4	1.73913
GO:0043410	BP	GO:0043410	positive regulation of MAPK cascade	26/605	474/18870	0.00574447	0.0354017	0.0262923	EZH2/STK3/EIF2AK2/RIPK2/NRG1/IGFBP6/TGFA/TLR4/IL1A/HIPK2/SOX2/PRKCA/RASGRP1/EDN3/CCL4/ROBO1/SYK/TP73/PRMT1/GPR183/CHI3L1/CCL22/CCL18/TNFSF11/PTPRC/CD27	26	0.548523
GO:0070507	BP	GO:0070507	regulation of microtubule cytoskeleton organization	12/605	161/18870	0.00579362	0.0354017	0.0262923	STIL/BORA/STMN1/SPAG5/TACC3/CENPJ/RAE1/PSRC1/TPX2/GPSM2/CKAP5/MET	12	0.745342
GO:0003157	BP	GO:0003157	endocardium development	3/605	12/18870	0.00581072	0.0354017	0.0262923	STK3/STK4/NRG1	3	2.5
GO:0009174	BP	GO:0009174	pyrimidine ribonucleoside monophosphate biosynthetic process	3/605	12/18870	0.00581072	0.0354017	0.0262923	DCK/CDA/UMPS	3	2.5
GO:0009176	BP	GO:0009176	pyrimidine deoxyribonucleoside monophosphate metabolic process	3/605	12/18870	0.00581072	0.0354017	0.0262923	TYMS/DUT/DPYD	3	2.5
GO:0010917	BP	GO:0010917	negative regulation of mitochondrial membrane potential	3/605	12/18870	0.00581072	0.0354017	0.0262923	BAX/BNIP3/PMAIP1	3	2.5
GO:0014004	BP	GO:0014004	microglia differentiation	3/605	12/18870	0.00581072	0.0354017	0.0262923	TLR4/TLR2/NDP	3	2.5
GO:0033145	BP	GO:0033145	positive regulation of intracellular steroid hormone receptor signaling pathway	3/605	12/18870	0.00581072	0.0354017	0.0262923	PARP1/FOXA1/MED1	3	2.5
GO:0034397	BP	GO:0034397	telomere localization	3/605	12/18870	0.00581072	0.0354017	0.0262923	NUP98/MLH1/ATM	3	2.5
GO:0045837	BP	GO:0045837	negative regulation of membrane potential	3/605	12/18870	0.00581072	0.0354017	0.0262923	BAX/BNIP3/PMAIP1	3	2.5
GO:0051549	BP	GO:0051549	positive regulation of keratinocyte migration	3/605	12/18870	0.00581072	0.0354017	0.0262923	MMP9/HBEGF/HAS2	3	2.5
GO:0060707	BP	GO:0060707	trophoblast giant cell differentiation	3/605	12/18870	0.00581072	0.0354017	0.0262923	E2F8/PLK4/E2F7	3	2.5
GO:0070671	BP	GO:0070671	response to interleukin-12	3/605	12/18870	0.00581072	0.0354017	0.0262923	RIPK2/STAT4/IL12RB2	3	2.5
GO:0072710	BP	GO:0072710	response to hydroxyurea	3/605	12/18870	0.00581072	0.0354017	0.0262923	RAD51/BLM/TIMELESS	3	2.5
GO:0061053	BP	GO:0061053	somite development	8/605	85/18870	0.00588461	0.0358045	0.0265915	MESP2/SMAD3/PALB2/PRKDC/LEF1/ATM/AXIN2/FRZB	8	0.941176
GO:1902895	BP	GO:1902895	positive regulation of miRNA transcription	6/605	52/18870	0.00616992	0.037491	0.027844	FOXA1/SMAD3/EGR1/MYB/MYC/GATA2	6	1.15385
GO:0009132	BP	GO:0009132	nucleoside diphosphate metabolic process	5/605	37/18870	0.00621712	0.0375187	0.0278646	RRM2/RRM1/CMPK2/DTYMK/UMPS	5	1.35135
GO:0010863	BP	GO:0010863	positive regulation of phospholipase C activity	5/605	37/18870	0.00621712	0.0375187	0.0278646	CD86/ESR1/ITK/ANG/ABL2	5	1.35135
GO:0071312	BP	GO:0071312	cellular response to alkaloid	5/605	37/18870	0.00621712	0.0375187	0.0278646	CHEK1/RAD51/BLM/CCNA2/SLC1A2	5	1.35135
GO:1905168	BP	GO:1905168	positive regulation of double-strand break repair via homologous recombination	5/605	37/18870	0.00621712	0.0375187	0.0278646	RAD51AP1/PARP1/TIMELESS/FANCB/ING3	5	1.35135
GO:0001659	BP	GO:0001659	temperature homeostasis	13/605	183/18870	0.0062227	0.0375187	0.0278646	RB1/EGR1/EPAS1/FH/TLR4/IL1A/CXCR4/EDN2/SYK/IL18/TNFSF11/PLAC8/ALDH1A1	13	0.710383
GO:0032642	BP	GO:0032642	regulation of chemokine production	9/605	104/18870	0.00622329	0.0375187	0.0278646	EIF2AK2/APOD/EGR1/RIPK2/TLR4/TSLP/TLR2/SYK/IL18	9	0.865385
GO:0002286	BP	GO:0002286	T cell activation involved in immune response	10/605	123/18870	0.00625455	0.0376579	0.027968	CD86/RIPK2/MYB/FCER1G/STAT4/LEF1/ASCL2/GPR183/IL18/HLX	10	0.813008
GO:0001822	BP	GO:0001822	kidney development	19/605	314/18870	0.0063058	0.0378995	0.0281474	EZH2/CENPF/HELLS/NUP107/AKR1B1/BAX/BCL2L11/SMAD3/STAT1/EGR1/MMP9/APAF1/TP73/GPC3/MYC/CXCR2/ID3/EPCAM/HAS2	19	0.605096
GO:2000243	BP	GO:2000243	positive regulation of reproductive process	8/605	86/18870	0.00631111	0.0378995	0.0281474	RAD51AP1/CDC25A/AURKA/CDC25C/HDAC2/BAX/CDC25B/TACR1	8	0.930233
GO:0034341	BP	GO:0034341	response to type II interferon	11/605	143/18870	0.0064083	0.0384331	0.0285437	GCH1/IFNGR1/STAT1/TLR4/TLR2/CCL4/CCL22/CCL18/MED1/HLA-DPA1/BST2	11	0.769231
GO:0007004	BP	GO:0007004	telomere maintenance via telomerase	7/605	69/18870	0.00650767	0.0388774	0.0288737	NEK2/RPA1/AURKB/TNKS1BP1/ATR/PIF1/ATM	7	1.01449
GO:0050918	BP	GO:0050918	positive chemotaxis	7/605	69/18870	0.00650767	0.0388774	0.0288737	HMGB2/SMAD3/F3/CXCL8/CXCL12/CXCL10/MET	7	1.01449
GO:2000401	BP	GO:2000401	regulation of lymphocyte migration	7/605	69/18870	0.00650767	0.0388774	0.0288737	APOD/CCL4/CXCL12/ABL2/CXCL10/CD200/ASCL2	7	1.01449
GO:0032602	BP	GO:0032602	chemokine production	9/605	105/18870	0.00661907	0.0394408	0.0292921	EIF2AK2/APOD/EGR1/RIPK2/TLR4/TSLP/TLR2/SYK/IL18	9	0.857143
GO:0042102	BP	GO:0042102	positive regulation of T cell proliferation	9/605	105/18870	0.00661907	0.0394408	0.0292921	CD86/RIPK2/IL1A/CD274/SYK/IL18/PNP/PTPRC/HLA-DPA1	9	0.857143
GO:0006213	BP	GO:0006213	pyrimidine nucleoside metabolic process	4/605	24/18870	0.00667169	0.0395499	0.0293731	TK1/CDA/DTYMK/DPYD	4	1.66667
GO:0009220	BP	GO:0009220	pyrimidine ribonucleotide biosynthetic process	4/605	24/18870	0.00667169	0.0395499	0.0293731	DCK/CTPS1/CDA/UMPS	4	1.66667
GO:0031145	BP	GO:0031145	anaphase-promoting complex-dependent catabolic process	4/605	24/18870	0.00667169	0.0395499	0.0293731	CDK2/UBE2C/CDC20/UBE2S	4	1.66667
GO:0051957	BP	GO:0051957	positive regulation of amino acid transport	4/605	24/18870	0.00667169	0.0395499	0.0293731	GABBR1/ARL6IP1/SLC38A1/SLC7A5	4	1.66667
GO:0031349	BP	GO:0031349	positive regulation of defense response	26/605	480/18870	0.00672752	0.0398297	0.0295809	HMGB2/IFI16/EIF2AK2/POLR3C/NMI/CD14/EREG/RIPK2/MMP12/TLR4/TSLP/ESR1/PRKDC/TLR2/OTULIN/RASGRP1/SYK/IRF7/XRCC6/IL18/TNFSF11/MED1/OSMR/CAMK2N1/BIRC3/PIK3R1	26	0.541667
GO:0033077	BP	GO:0033077	T cell differentiation in thymus	8/605	87/18870	0.00676064	0.0399744	0.0296884	RIPK2/IL1A/PRKDC/CD3G/RASGRP1/CD3D/IL7R/PTPRC	8	0.91954
GO:0003180	BP	GO:0003180	aortic valve morphogenesis	5/605	38/18870	0.00697424	0.041027	0.0304702	RB1/SLIT3/ROBO1/AXIN2/HEY2	5	1.31579
GO:0045429	BP	GO:0045429	positive regulation of nitric oxide biosynthetic process	5/605	38/18870	0.00697424	0.041027	0.0304702	SMAD3/P2RX4/TLR4/HBB/CLU	5	1.31579
GO:0045652	BP	GO:0045652	regulation of megakaryocyte differentiation	5/605	38/18870	0.00697424	0.041027	0.0304702	HMGB2/MYB/LOX/PRMT1/GATA2	5	1.31579
GO:0072529	BP	GO:0072529	pyrimidine-containing compound catabolic process	5/605	38/18870	0.00697424	0.041027	0.0304702	DCTPP1/MBD4/DUT/CDA/DPYD	5	1.31579
GO:0071675	BP	GO:0071675	regulation of mononuclear cell migration	10/605	125/18870	0.00698934	0.0410635	0.0304972	C3AR1/APOD/SLAMF8/PTK2/CCL4/CXCL12/ABL2/CXCL10/CD200/ASCL2	10	0.8
GO:1902893	BP	GO:1902893	regulation of miRNA transcription	7/605	70/18870	0.00703619	0.0412861	0.0306626	FOXA1/SMAD3/EGR1/ESR1/MYB/MYC/GATA2	7	1
GO:0032640	BP	GO:0032640	tumor necrosis factor production	13/605	186/18870	0.00710384	0.0415773	0.0308788	HDAC2/CD14/IFNGR1/RIPK2/RAD21/TLR4/IL1A/TLR2/RASGRP1/SYK/CLU/PTPRC/PIK3R1	13	0.698925
GO:0032680	BP	GO:0032680	regulation of tumor necrosis factor production	13/605	186/18870	0.00710384	0.0415773	0.0308788	HDAC2/CD14/IFNGR1/RIPK2/RAD21/TLR4/IL1A/TLR2/RASGRP1/SYK/CLU/PTPRC/PIK3R1	13	0.698925
GO:0046330	BP	GO:0046330	positive regulation of JNK cascade	8/605	88/18870	0.00723396	0.0422852	0.0314046	STK3/RIPK2/TLR4/IL1A/HIPK2/RASGRP1/TNFSF11/CD27	8	0.909091
GO:0002819	BP	GO:0002819	regulation of adaptive immune response	14/605	208/18870	0.00736196	0.0423627	0.0314622	CR2/RIPK2/CD274/MLH1/MSH2/PAXIP1/IRF7/TAP2/ASCL2/IL18/HLX/AHR/IL7R/PTPRC	14	0.673077
GO:0002430	BP	GO:0002430	complement receptor mediated signaling pathway	3/605	13/18870	0.00737582	0.0423627	0.0314622	CR2/C3AR1/GPLD1	3	2.30769
GO:0009133	BP	GO:0009133	nucleoside diphosphate biosynthetic process	3/605	13/18870	0.00737582	0.0423627	0.0314622	CMPK2/DTYMK/UMPS	3	2.30769
GO:0032306	BP	GO:0032306	regulation of prostaglandin secretion	3/605	13/18870	0.00737582	0.0423627	0.0314622	P2RX4/IL1A/TNFSF11	3	2.30769
GO:0032308	BP	GO:0032308	positive regulation of prostaglandin secretion	3/605	13/18870	0.00737582	0.0423627	0.0314622	P2RX4/IL1A/TNFSF11	3	2.30769
GO:0033262	BP	GO:0033262	regulation of nuclear cell cycle DNA replication	3/605	13/18870	0.00737582	0.0423627	0.0314622	CDC7/TIPIN/DBF4	3	2.30769
GO:0034086	BP	GO:0034086	maintenance of sister chromatid cohesion	3/605	13/18870	0.00737582	0.0423627	0.0314622	DSCC1/BUB1/RB1	3	2.30769
GO:0034088	BP	GO:0034088	maintenance of mitotic sister chromatid cohesion	3/605	13/18870	0.00737582	0.0423627	0.0314622	DSCC1/BUB1/RB1	3	2.30769
GO:0042492	BP	GO:0042492	gamma-delta T cell differentiation	3/605	13/18870	0.00737582	0.0423627	0.0314622	SYK/LEF1/PTPRC	3	2.30769
GO:0061517	BP	GO:0061517	macrophage proliferation	3/605	13/18870	0.00737582	0.0423627	0.0314622	PTK2/CLU/NDP	3	2.30769
GO:1900103	BP	GO:1900103	positive regulation of endoplasmic reticulum unfolded protein response	3/605	13/18870	0.00737582	0.0423627	0.0314622	BAX/BCL2L11/PIK3R1	3	2.30769
GO:1902947	BP	GO:1902947	regulation of tau-protein kinase activity	3/605	13/18870	0.00737582	0.0423627	0.0314622	RB1/EGR1/CLU	3	2.30769
GO:1903238	BP	GO:1903238	positive regulation of leukocyte tethering or rolling	3/605	13/18870	0.00737582	0.0423627	0.0314622	CHST4/SELP/CHST2	3	2.30769
GO:1903624	BP	GO:1903624	regulation of DNA catabolic process	3/605	13/18870	0.00737582	0.0423627	0.0314622	BAX/APAF1/ATM	3	2.30769
GO:0046605	BP	GO:0046605	regulation of centrosome cycle	6/605	54/18870	0.00741882	0.0425567	0.0316062	STIL/AURKA/PLK4/BRCA1/CENPJ/CCNF	6	1.11111
GO:0002697	BP	GO:0002697	regulation of immune effector process	22/605	389/18870	0.00752572	0.0431163	0.0320218	CR2/CD86/RIPK2/TLR4/SLAMF8/RASGRP1/MLH1/MSH2/SLC7A5/PAXIP1/SYK/IRF5/TAP2/ASCL2/IL18/HLX/AHR/CD177/IL7R/PTPRC/BST2/GATA2	22	0.565553
GO:0002548	BP	GO:0002548	monocyte chemotaxis	7/605	71/18870	0.00759587	0.0433566	0.0322003	SLAMF8/CCL4/CXCL12/CXCL10/CCL22/CCL18/TNFSF11	7	0.985915
GO:0042698	BP	GO:0042698	ovulation cycle	7/605	71/18870	0.00759587	0.0433566	0.0322003	PCNA/CASP2/EREG/SLIT3/EGR1/ESR1/HAS2	7	0.985915
GO:0061614	BP	GO:0061614	miRNA transcription	7/605	71/18870	0.00759587	0.0433566	0.0322003	FOXA1/SMAD3/EGR1/ESR1/MYB/MYC/GATA2	7	0.985915
GO:0097696	BP	GO:0097696	receptor signaling pathway via STAT	13/605	188/18870	0.0077442	0.0439334	0.0326287	USP1/CENPJ/CNOT7/HDAC2/NMI/STAT1/TSLP/STAT4/IFNAR1/IL18/IL15RA/IL7R/PTPRC	13	0.691489
GO:0010623	BP	GO:0010623	programmed cell death involved in cell development	4/605	25/18870	0.00774455	0.0439334	0.0326287	CASP2/BAX/IL1A/PRKDC	4	1.6
GO:0046641	BP	GO:0046641	positive regulation of alpha-beta T cell proliferation	4/605	25/18870	0.00774455	0.0439334	0.0326287	RIPK2/SYK/IL18/PTPRC	4	1.6
GO:0050927	BP	GO:0050927	positive regulation of positive chemotaxis	4/605	25/18870	0.00774455	0.0439334	0.0326287	SMAD3/F3/CXCL8/CXCL12	4	1.6
GO:1901071	BP	GO:1901071	glucosamine-containing compound metabolic process	4/605	25/18870	0.00774455	0.0439334	0.0326287	CHST4/CHST2/CHI3L1/NANP	4	1.6
GO:0051028	BP	GO:0051028	mRNA transport	10/605	127/18870	0.00778926	0.0439407	0.0326341	NUP205/NUP107/NUP50/SLBP/RAE1/NUP37/NUP98/NUP153/UPF3B/DDX39A	10	0.787402
GO:0016233	BP	GO:0016233	telomere capping	5/605	39/18870	0.00779347	0.0439407	0.0326341	NEK2/DCLRE1B/AURKB/PRKDC/ATM	5	1.28205
GO:0051438	BP	GO:0051438	regulation of ubiquitin-protein transferase activity	5/605	39/18870	0.00779347	0.0439407	0.0326341	FBXO5/UBE2C/MAD2L1/CDC20/UBE2S	5	1.28205
GO:1900274	BP	GO:1900274	regulation of phospholipase C activity	5/605	39/18870	0.00779347	0.0439407	0.0326341	CD86/ESR1/ITK/ANG/ABL2	5	1.28205
GO:1904407	BP	GO:1904407	positive regulation of nitric oxide metabolic process	5/605	39/18870	0.00779347	0.0439407	0.0326341	SMAD3/P2RX4/TLR4/HBB/CLU	5	1.28205
GO:0021537	BP	GO:0021537	telencephalon development	17/605	276/18870	0.00800044	0.0450525	0.0334598	ASPM/EZH2/KIF14/TRA2B/TACC3/HPRT1/BAX/BNIP3/CXCR4/SLC2A1/ROBO1/CXCL12/LEF1/RAN/ID4/ID2/SLC1A2	17	0.615942
GO:0002204	BP	GO:0002204	somatic recombination of immunoglobulin genes involved in immune response	6/605	55/18870	0.00810731	0.0454325	0.033742	EXO1/RNF168/MLH1/MSH2/PAXIP1/PTPRC	6	1.09091
GO:0002208	BP	GO:0002208	somatic diversification of immunoglobulins involved in immune response	6/605	55/18870	0.00810731	0.0454325	0.033742	EXO1/RNF168/MLH1/MSH2/PAXIP1/PTPRC	6	1.09091
GO:0045190	BP	GO:0045190	isotype switching	6/605	55/18870	0.00810731	0.0454325	0.033742	EXO1/RNF168/MLH1/MSH2/PAXIP1/PTPRC	6	1.09091
GO:0072698	BP	GO:0072698	protein localization to microtubule cytoskeleton	6/605	55/18870	0.00810731	0.0454325	0.033742	STIL/TTK/AURKA/SPAG5/KIF20B/FAM83D	6	1.09091
GO:0038061	BP	GO:0038061	non-canonical NF-kappaB signal transduction	11/605	148/18870	0.00822676	0.0460459	0.0341976	EIF2AK2/NMI/CD86/REL/TLR4/TLR2/IL18/CHI3L1/PTP4A3/CD27/BIRC3	11	0.743243
GO:0002312	BP	GO:0002312	B cell activation involved in immune response	8/605	90/18870	0.00825506	0.0460924	0.0342322	EXO1/RNF168/TLR4/MLH1/MSH2/PAXIP1/GPR183/PTPRC	8	0.888889
GO:0010657	BP	GO:0010657	muscle cell apoptotic process	8/605	90/18870	0.00825506	0.0460924	0.0342322	CDKN2A/DNMT1/APAF1/BNIP3/SLC7A5/E2F3/HEY2/CXCR2	8	0.888889
GO:0051259	BP	GO:0051259	protein complex oligomerization	16/605	255/18870	0.00837796	0.0466885	0.0346749	BLM/RRM2/ECT2/TK1/RRM1/POLQ/STK3/HPRT1/STK4/RIPK2/NUDT21/OPA1/TP73/PRMT1/HOMER1/SLC1A2	16	0.627451
GO:0007249	BP	GO:0007249	canonical NF-kappaB signal transduction	18/605	300/18870	0.00838612	0.0466885	0.0346749	ECT2/PARP1/ATP2C1/CASP8/STAT1/TNFSF10/RIPK2/PRDX4/SLC20A1/REL/TLR4/ESR1/IL1A/TLR2/PIDD1/TNFSF11/BST2/BIRC3	18	0.6
GO:0002768	BP	GO:0002768	immune response-regulating cell surface receptor signaling pathway	20/605	346/18870	0.00839219	0.0466885	0.0346749	CR2/C3AR1/NMI/BAX/CD14/RIPK2/TLR4/TLR2/CD3G/FCER1G/PTK2/ITK/CD3D/SYK/CTLA4/LCP2/PTPRC/GPLD1/CD38/PIK3R1	20	0.578035
GO:0031056	BP	GO:0031056	regulation of histone modification	5/605	40/18870	0.00867725	0.0481499	0.0357602	DEK/BRCA1/SUV39H1/SET/GATA2	5	1.25
GO:0042307	BP	GO:0042307	positive regulation of protein import into nucleus	5/605	40/18870	0.00867725	0.0481499	0.0357602	CDK1/ECT2/SMAD3/RAN/PIK3R1	5	1.25
GO:0072001	BP	GO:0072001	renal system development	19/605	324/18870	0.00868619	0.0481499	0.0357602	EZH2/CENPF/HELLS/NUP107/AKR1B1/BAX/BCL2L11/SMAD3/STAT1/EGR1/MMP9/APAF1/TP73/GPC3/MYC/CXCR2/ID3/EPCAM/HAS2	19	0.58642
GO:0002443	BP	GO:0002443	leukocyte mediated immunity	25/605	466/18870	0.00872615	0.0483133	0.0358816	EXO1/RNF168/CR2/HPRT1/C1QB/TLR4/FCER1G/RASGRP1/MLH1/MSH2/TUBB/PAXIP1/SYK/IRF7/TAP2/IL18/AHR/CD177/GZMB/CLU/IL7R/PTPRC/BST2/CD27/GATA2	25	0.536481
GO:0032732	BP	GO:0032732	positive regulation of interleukin-1 production	7/605	73/18870	0.00881293	0.0485393	0.0360494	IFI16/HDAC2/CASP8/SMAD3/EGR1/RIPK2/TLR4	7	0.958904
GO:0001541	BP	GO:0001541	ovarian follicle development	6/605	56/18870	0.00884054	0.0485393	0.0360494	FANCG/BAX/EREG/ESR1/ANG/ATM	6	1.07143
GO:0030857	BP	GO:0030857	negative regulation of epithelial cell differentiation	6/605	56/18870	0.00884054	0.0485393	0.0360494	EZH2/CCND1/STAT1/MMP9/IL1A/FRZB	6	1.07143
GO:0043370	BP	GO:0043370	regulation of CD4-positive, alpha-beta T cell differentiation	6/605	56/18870	0.00884054	0.0485393	0.0360494	CD86/RIPK2/ASCL2/IL18/HLX/CD83	6	1.07143
GO:0001894	BP	GO:0001894	tissue homeostasis	17/605	279/18870	0.00885917	0.0485393	0.0360494	BARD1/RB1/BAX/P2RX4/FH/TLR4/SPP1/PRKCA/SLC2A1/LYZ/SYK/TNFSF11/AZGP1/NDP/GATA2/CD38/ALDH1A1	17	0.609319
GO:0060249	BP	GO:0060249	anatomical structure homeostasis	17/605	279/18870	0.00885917	0.0485393	0.0360494	BARD1/RB1/BAX/P2RX4/FH/TLR4/SPP1/PRKCA/SLC2A1/LYZ/SYK/TNFSF11/AZGP1/NDP/GATA2/CD38/ALDH1A1	17	0.609319
GO:0018210	BP	GO:0018210	peptidyl-threonine modification	9/605	110/18870	0.00889509	0.0485393	0.0360494	CDK1/CHEK1/DYRK2/TNKS1BP1/RIPK2/HIPK2/PRKDC/PRKCA/CHI3L1	9	0.818182
GO:0090398	BP	GO:0090398	cellular senescence	9/605	110/18870	0.00889509	0.0485393	0.0360494	CDKN2A/RBL1/CDK2/FBXO5/BRCA2/SMC6/OPA1/ATM/ID2	9	0.818182
GO:0002407	BP	GO:0002407	dendritic cell chemotaxis	4/605	26/18870	0.00892484	0.0485393	0.0360494	SLAMF8/CXCR4/GPR183/CXCR2	4	1.53846
GO:0003181	BP	GO:0003181	atrioventricular valve morphogenesis	4/605	26/18870	0.00892484	0.0485393	0.0360494	SLIT3/AXIN2/OLFM1/HEY2	4	1.53846
GO:0014829	BP	GO:0014829	vascular associated smooth muscle contraction	4/605	26/18870	0.00892484	0.0485393	0.0360494	ATP2B1/EDN3/EDN2/CD38	4	1.53846
GO:0032148	BP	GO:0032148	activation of protein kinase B activity	4/605	26/18870	0.00892484	0.0485393	0.0360494	NRG1/CCDC88A/ANG/IL18	4	1.53846
GO:0050926	BP	GO:0050926	regulation of positive chemotaxis	4/605	26/18870	0.00892484	0.0485393	0.0360494	SMAD3/F3/CXCL8/CXCL12	4	1.53846
GO:0060561	BP	GO:0060561	apoptotic process involved in morphogenesis	4/605	26/18870	0.00892484	0.0485393	0.0360494	BAX/BCL2L11/LEF1/CRYAB	4	1.53846
GO:1902455	BP	GO:1902455	negative regulation of stem cell population maintenance	4/605	26/18870	0.00892484	0.0485393	0.0360494	HDAC2/RBBP7/BRMS1L/SAP30	4	1.53846
GO:0042098	BP	GO:0042098	T cell proliferation	14/605	213/18870	0.00898488	0.0488083	0.0362492	BID/CTPS1/BAX/CD86/RIPK2/IL1A/CD274/RASGRP1/SYK/CTLA4/IL18/PNP/PTPRC/HLA-DPA1	14	0.657277
GO:0002832	BP	GO:0002832	negative regulation of response to biotic stimulus	11/605	150/18870	0.00905713	0.0491429	0.0364977	PARP1/IFI16/CNOT7/NMI/AURKB/MMP12/METTL3/PRKDC/SLAMF8/LYAR/AHR	11	0.733333
GO:0009158	BP	GO:0009158	ribonucleoside monophosphate catabolic process	3/605	14/18870	0.00916643	0.0493873	0.0366792	HPRT1/DPYD/PNP	3	2.14286
GO:0043045	BP	GO:0043045	post-fertilization epigenetic regulation of gene expression	3/605	14/18870	0.00916643	0.0493873	0.0366792	SUV39H1/DNMT1/DNMT3A	3	2.14286
GO:0045059	BP	GO:0045059	positive thymic T cell selection	3/605	14/18870	0.00916643	0.0493873	0.0366792	CD3G/CD3D/PTPRC	3	2.14286
GO:0051547	BP	GO:0051547	regulation of keratinocyte migration	3/605	14/18870	0.00916643	0.0493873	0.0366792	MMP9/HBEGF/HAS2	3	2.14286
GO:0070341	BP	GO:0070341	fat cell proliferation	3/605	14/18870	0.00916643	0.0493873	0.0366792	E2F1/TFDP1/E2F3	3	2.14286
GO:0097202	BP	GO:0097202	activation of cysteine-type endopeptidase activity	3/605	14/18870	0.00916643	0.0493873	0.0366792	IFI16/CASP8/RIPK2	3	2.14286
GO:0051897	BP	GO:0051897	positive regulation of phosphatidylinositol 3-kinase/protein kinase B signal transduction	12/605	171/18870	0.00920261	0.0495244	0.036781	STK3/F3/P2RX4/PTK2/CSF3/IGFBP5/SELP/IL18/CHI3L1/ENG/TNFSF11/HBEGF	12	0.701754
GO:0009636	BP	GO:0009636	response to toxic substance	16/605	258/18870	0.00931283	0.0500592	0.0371782	BRIP1/CDK1/FANCC/DHFR/TYMS/GCH1/BAX/MAOB/PRDX4/TLR2/CCL4/GPX3/AHR/HBB/DNMT3A/ALDH1A1	16	0.620155
GO:0043270	BP	GO:0043270	positive regulation of monoatomic ion transport	14/605	214/18870	0.00934096	0.0501519	0.0372471	SCN1B/BAX/COX17/P2RX4/ATP2B1/PPP3R1/EDN3/CXCL9/GLRX/CCL4/CXCL12/CXCL10/HOMER1/CXCL11	14	0.654206
GO:0010717	BP	GO:0010717	regulation of epithelial to mesenchymal transition	9/605	111/18870	0.00941378	0.0504255	0.0374502	EZH2/HDAC2/FOXA1/SMAD3/PTK2/LEF1/ENG/AXIN2/OLFM1	9	0.810811
GO:1902106	BP	GO:1902106	negative regulation of leukocyte differentiation	9/605	111/18870	0.00941378	0.0504255	0.0374502	LRRC17/TLR4/CTLA4/ASCL2/HLX/MYC/ID2/GATA2/PIK3R1	9	0.810811
GO:0060485	BP	GO:0060485	mesenchyme development	19/605	327/18870	0.0095268	0.0509717	0.0378559	EZH2/HDAC2/FOXA1/SMAD3/STAT1/NRG1/FAM83D/PTK2/PPP3R1/EDN3/ROBO1/LEF1/ENG/AXIN2/MYC/OLFM1/HEY2/FRZB/HAS2	19	0.58104
GO:0002822	BP	GO:0002822	regulation of adaptive immune response based on somatic recombination of immune receptors built from immunoglobulin superfamily domains	13/605	193/18870	0.00954529	0.0510114	0.0378854	CR2/RIPK2/CD274/MLH1/MSH2/PAXIP1/TAP2/ASCL2/IL18/HLX/AHR/IL7R/PTPRC	13	0.673575
GO:0019079	BP	GO:0019079	viral genome replication	10/605	131/18870	0.0095991	0.0511567	0.0379933	DEK/TOP2A/IFI16/EIF2AK2/CNOT7/SMC6/ISG20/CXCL8/NUCKS1/BST2	10	0.763359
GO:0072132	BP	GO:0072132	mesenchyme morphogenesis	6/605	57/18870	0.00962002	0.0511567	0.0379933	SMAD3/ROBO1/LEF1/ENG/MYC/HEY2	6	1.05263
GO:0051954	BP	GO:0051954	positive regulation of amine transport	5/605	41/18870	0.00962793	0.0511567	0.0379933	GABBR1/ARL6IP1/SLC38A1/SLC7A5/CXCL12	5	1.21951
GO:0060251	BP	GO:0060251	regulation of glial cell proliferation	5/605	41/18870	0.00962793	0.0511567	0.0379933	RB1/PRKCI/MYB/SLC7A5/ASCL2	5	1.21951
GO:0150077	BP	GO:0150077	regulation of neuroinflammatory response	5/605	41/18870	0.00962793	0.0511567	0.0379933	MMP9/CD200/IL18/ATM/PTPRC	5	1.21951
GO:0006367	BP	GO:0006367	transcription initiation at RNA polymerase II promoter	9/605	112/18870	0.009955	0.0528336	0.0392388	E2F2/ESR1/POLR2I/PAXIP1/E2F3/CDK4/POLR2D/MED1/HEY2	9	0.803571
GO:0043279	BP	GO:0043279	response to alkaloid	8/605	93/18870	0.00998431	0.0529283	0.0393091	CHEK1/RAD51/BLM/CCNA2/HDAC2/HOMER1/DNMT3A/SLC1A2	8	0.860215
GO:0007204	BP	GO:0007204	positive regulation of cytosolic calcium ion concentration	12/605	173/18870	0.0100412	0.0531686	0.0394875	C3AR1/BAX/CXCR3/P2RX4/ESR1/CXCR4/EDN2/TACR1/ABL2/CXCR2/GATA2/CD38	12	0.693642
GO:1903322	BP	GO:1903322	positive regulation of protein modification by small protein conjugation or removal	10/605	132/18870	0.010098	0.0534082	0.0396655	FANCI/BRCA1/UBE2C/NMI/CDC20/RIPK2/FANCM/UBE2S/PAXIP1/BIRC3	10	0.757576
GO:0006278	BP	GO:0006278	RNA-templated DNA biosynthetic process	7/605	75/18870	0.0101673	0.0536047	0.0398114	NEK2/RPA1/AURKB/TNKS1BP1/ATR/PIF1/ATM	7	0.933333
GO:0030968	BP	GO:0030968	endoplasmic reticulum unfolded protein response	7/605	75/18870	0.0101673	0.0536047	0.0398114	EIF2AK2/BAX/EIF2S1/BCL2L11/CCND1/ATF3/PIK3R1	7	0.933333
GO:0007141	BP	GO:0007141	male meiosis I	4/605	27/18870	0.0102165	0.0536047	0.0398114	TRIP13/RAD51C/BRCA2/CCNA1	4	1.48148
GO:0010460	BP	GO:0010460	positive regulation of heart rate	4/605	27/18870	0.0102165	0.0536047	0.0398114	GCH1/EDN3/EDN2/HEY2	4	1.48148
GO:0032753	BP	GO:0032753	positive regulation of interleukin-4 production	4/605	27/18870	0.0102165	0.0536047	0.0398114	CD86/FCER1G/SLC7A5/SYK	4	1.48148
GO:0048714	BP	GO:0048714	positive regulation of oligodendrocyte differentiation	4/605	27/18870	0.0102165	0.0536047	0.0398114	HDAC2/TLR2/CXCR4/TP73	4	1.48148
GO:0051446	BP	GO:0051446	positive regulation of meiotic cell cycle	4/605	27/18870	0.0102165	0.0536047	0.0398114	RAD51AP1/CDC25A/CDC25C/CDC25B	4	1.48148
GO:0002757	BP	GO:0002757	immune response-activating signaling pathway	25/605	473/18870	0.0104012	0.0545117	0.040485	CR2/EIF2AK2/C3AR1/NMI/BAX/CD14/RIPK2/TLR4/ESR1/TLR2/CD3G/FCER1G/OTULIN/PTK2/ITK/CD3D/SYK/IRF7/CTLA4/LCP2/PTPRC/GPLD1/CD38/BIRC3/PIK3R1	25	0.528541
GO:0042306	BP	GO:0042306	regulation of protein import into nucleus	6/605	58/18870	0.0104472	0.0546289	0.040572	CDK1/ECT2/APOD/SMAD3/RAN/PIK3R1	6	1.03448
GO:0070231	BP	GO:0070231	T cell apoptotic process	6/605	58/18870	0.0104472	0.0546289	0.040572	BAX/BCL2L11/CD274/CHEK2/IL7R/CD27	6	1.03448
GO:0071453	BP	GO:0071453	cellular response to oxygen levels	12/605	174/18870	0.0104821	0.0547488	0.0406611	BRIP1/CCNA2/SUV39H1/EGR1/EPAS1/HIPK2/BNIP3/ACAA2/DNMT3A/MYC/NDP/PMAIP1	12	0.689655
GO:0050727	BP	GO:0050727	regulation of inflammatory response	23/605	425/18870	0.0105138	0.0548528	0.0407383	FANCD2/RB1/FANCA/NMI/SMAD3/PBK/MMP9/TLR4/TSLP/ESR1/TLR2/SLAMF8/OTULIN/SYK/CD200/IL18/ATM/AHR/TNFSF11/OSMR/PTPRC/CAMK2N1/BIRC3	23	0.541176
GO:0006040	BP	GO:0006040	amino sugar metabolic process	5/605	42/18870	0.0106478	0.0551773	0.0409793	CHST4/CHST2/CHI3L1/NANP/ALDH1A1	5	1.19048
GO:0009126	BP	GO:0009126	purine nucleoside monophosphate metabolic process	5/605	42/18870	0.0106478	0.0551773	0.0409793	HPRT1/DCK/DGUOK/PAICS/PNP	5	1.19048
GO:0042092	BP	GO:0042092	type 2 immune response	5/605	42/18870	0.0106478	0.0551773	0.0409793	CD86/MYB/ASCL2/IL18/HLX	5	1.19048
GO:0045124	BP	GO:0045124	regulation of bone resorption	5/605	42/18870	0.0106478	0.0551773	0.0409793	SPP1/PRKCA/SYK/TNFSF11/CD38	5	1.19048
GO:1901983	BP	GO:1901983	regulation of protein acetylation	5/605	42/18870	0.0106478	0.0551773	0.0409793	DEK/BRCA1/HDAC2/SET/GATA2	5	1.19048
GO:2000403	BP	GO:2000403	positive regulation of lymphocyte migration	5/605	42/18870	0.0106478	0.0551773	0.0409793	CCL4/CXCL12/ABL2/CXCL10/ASCL2	5	1.19048
GO:0043123	BP	GO:0043123	positive regulation of canonical NF-kappaB signal transduction	13/605	196/18870	0.0107737	0.0557667	0.0414171	ECT2/PARP1/ATP2C1/CASP8/TNFSF10/RIPK2/SLC20A1/REL/TLR4/IL1A/TNFSF11/BST2/BIRC3	13	0.663265
GO:0050679	BP	GO:0050679	positive regulation of epithelial cell proliferation	14/605	218/18870	0.0108777	0.0562423	0.0417703	HMGB2/CCND1/F3/MMP12/TGFA/PRKCA/TACR1/ANG/CXCL12/HLX/MED1/MYC/GATA2/HAS2	14	0.642202
GO:0032725	BP	GO:0032725	positive regulation of granulocyte macrophage colony-stimulating factor production	3/605	15/18870	0.0111888	0.0572091	0.0424884	RASGRP1/SYK/IL18	3	2
GO:0033689	BP	GO:0033689	negative regulation of osteoblast proliferation	3/605	15/18870	0.0111888	0.0572091	0.0424884	EIF2AK2/SMAD3/AXIN2	3	2
GO:0044849	BP	GO:0044849	estrous cycle	3/605	15/18870	0.0111888	0.0572091	0.0424884	PCNA/EGR1/HAS2	3	2
GO:0045737	BP	GO:0045737	positive regulation of cyclin-dependent protein serine/threonine kinase activity	3/605	15/18870	0.0111888	0.0572091	0.0424884	PSRC1/CCND1/CCND2	3	2
GO:0046049	BP	GO:0046049	UMP metabolic process	3/605	15/18870	0.0111888	0.0572091	0.0424884	CDA/UMPS/DPYD	3	2
GO:0046655	BP	GO:0046655	folic acid metabolic process	3/605	15/18870	0.0111888	0.0572091	0.0424884	DHFR/MTHFD2/MTRR	3	2
GO:0048070	BP	GO:0048070	regulation of developmental pigmentation	3/605	15/18870	0.0111888	0.0572091	0.0424884	BAX/BCL2L11/EDN3	3	2
GO:0051290	BP	GO:0051290	protein heterotetramerization	3/605	15/18870	0.0111888	0.0572091	0.0424884	RRM2/RRM1/NUDT21	3	2
GO:0070365	BP	GO:0070365	hepatocyte differentiation	3/605	15/18870	0.0111888	0.0572091	0.0424884	E2F8/E2F7/FRZB	3	2
GO:0072537	BP	GO:0072537	fibroblast activation	3/605	15/18870	0.0111888	0.0572091	0.0424884	MYB/GCLC/GCLM	3	2
GO:0009060	BP	GO:0009060	aerobic respiration	13/605	197/18870	0.0112093	0.0572508	0.0425193	CDK1/CCNB1/BID/DGUOK/COX7B/UQCR10/NDUFA6/FH/BNIP3/MSH2/NDUFA7/SDHB/NDP	13	0.659898
GO:0044380	BP	GO:0044380	protein localization to cytoskeleton	6/605	59/18870	0.0113237	0.057707	0.0428581	STIL/TTK/AURKA/SPAG5/KIF20B/FAM83D	6	1.01695
GO:2000107	BP	GO:2000107	negative regulation of leukocyte apoptotic process	6/605	59/18870	0.0113237	0.057707	0.0428581	AURKB/CXCL12/IRF7/IL7R/CXCR2/CD27	6	1.01695
GO:0015732	BP	GO:0015732	prostaglandin transport	4/605	28/18870	0.0116233	0.0590382	0.0438468	P2RX4/IL1A/SLCO2A1/TNFSF11	4	1.42857
GO:0070423	BP	GO:0070423	nucleotide-binding oligomerization domain containing signaling pathway	4/605	28/18870	0.0116233	0.0590382	0.0438468	RIPK2/TLR4/OTULIN/BIRC3	4	1.42857
GO:2000108	BP	GO:2000108	positive regulation of leukocyte apoptotic process	4/605	28/18870	0.0116233	0.0590382	0.0438468	CDKN2A/BAX/BCL2L11/CD274	4	1.42857
GO:0045664	BP	GO:0045664	regulation of neuron differentiation	13/605	198/18870	0.0116586	0.0591305	0.0439154	ASPM/ECT2/GDPD5/FOXA1/SOX2/UPF3B/TP73/CXCL12/MED1/HEY2/ID4/ID2/GATA2	13	0.656566
GO:0008652	BP	GO:0008652	amino acid biosynthetic process	7/605	77/18870	0.0116671	0.0591305	0.0439154	DHFR/PLOD2/MTRR/SLC38A1/DPYD/GOT2/ALDH1A1	7	0.909091
GO:0003176	BP	GO:0003176	aortic valve development	5/605	43/18870	0.0117392	0.0592352	0.0439931	RB1/SLIT3/ROBO1/AXIN2/HEY2	5	1.16279
GO:0006513	BP	GO:0006513	protein monoubiquitination	5/605	43/18870	0.0117392	0.0592352	0.0439931	DTL/UHRF1/UBE2T/FANCL/FANCM	5	1.16279
GO:0032735	BP	GO:0032735	positive regulation of interleukin-12 production	5/605	43/18870	0.0117392	0.0592352	0.0439931	RIPK2/TLR4/TLR2/SYK/IRF5	5	1.16279
GO:0045622	BP	GO:0045622	regulation of T-helper cell differentiation	5/605	43/18870	0.0117392	0.0592352	0.0439931	CD86/RIPK2/ASCL2/IL18/HLX	5	1.16279
GO:0043122	BP	GO:0043122	regulation of canonical NF-kappaB signal transduction	16/605	265/18870	0.0118177	0.0595666	0.0442392	ECT2/PARP1/ATP2C1/CASP8/STAT1/TNFSF10/RIPK2/SLC20A1/REL/TLR4/ESR1/IL1A/PIDD1/TNFSF11/BST2/BIRC3	16	0.603774
GO:1903532	BP	GO:1903532	positive regulation of secretion by cell	17/605	288/18870	0.0118851	0.0598409	0.044443	GABBR1/P2RX4/TLR4/IL1A/MYB/TLR2/SPP1/EDN3/TACR1/ANG/SYK/CXCL12/CD177/TNFSF11/GPLD1/GATA2/CD38	17	0.590278
GO:1903320	BP	GO:1903320	regulation of protein modification by small protein conjugation or removal	15/605	243/18870	0.0120412	0.0605608	0.0449776	FANCI/FBXO5/BRCA1/UBE2C/MAD2L1/NMI/CDC20/EGR1/RIPK2/EPAS1/FANCM/UBE2S/GCLC/PAXIP1/BIRC3	15	0.617284
GO:0007281	BP	GO:0007281	germ cell development	20/605	359/18870	0.0122389	0.061347	0.0455615	BRIP1/AURKA/ASPM/FANCC/TRIP13/FBXO5/HMGB2/FANCG/BRCA2/BAX/EREG/PSME4/METTL3/MLH1/MSH2/CDC25B/ANG/RAN/ATM/DNMT3A	20	0.557103
GO:0001961	BP	GO:0001961	positive regulation of cytokine-mediated signaling pathway	6/605	60/18870	0.0122508	0.061347	0.0455615	RIPK2/MMP12/TSLP/CXCR4/IRF7/MED1	6	1
GO:0002381	BP	GO:0002381	immunoglobulin production involved in immunoglobulin-mediated immune response	6/605	60/18870	0.0122508	0.061347	0.0455615	EXO1/RNF168/MLH1/MSH2/PAXIP1/PTPRC	6	1
GO:0006767	BP	GO:0006767	water-soluble vitamin metabolic process	6/605	60/18870	0.0122508	0.061347	0.0455615	DHFR/MTHFD2/AKR1B1/MTRR/SLC2A1/GCLC	6	1
GO:0001824	BP	GO:0001824	blastocyst development	9/605	116/18870	0.0123569	0.0618111	0.0459062	CHEK1/GINS1/NEK2/RRM2/SP3/BRCA2/ASF1B/PALB2/NASP	9	0.775862
GO:1901136	BP	GO:1901136	carbohydrate derivative catabolic process	12/605	178/18870	0.012397	0.0619448	0.0460055	HMMR/DCTPP1/MBD4/HPRT1/DUT/GUSB/MMP12/CDA/DPYD/CHI3L1/PNP/ALDH1A1	12	0.674157
GO:0070371	BP	GO:0070371	ERK1 and ERK2 cascade	19/605	336/18870	0.0124468	0.0620615	0.0460921	CDK1/RIPK2/NRG1/FAM83D/TLR4/IL1A/PRKCA/RASGRP1/CCL4/SYK/ATF3/GPR183/CHI3L1/CCL22/CCL18/TNFSF11/MYC/PSCA/PTPRC	19	0.565476
GO:0046209	BP	GO:0046209	nitric oxide metabolic process	7/605	78/18870	0.0124742	0.0620615	0.0460921	GCH1/SMAD3/P2RX4/TLR4/TLR2/HBB/CLU	7	0.897436
GO:2000514	BP	GO:2000514	regulation of CD4-positive, alpha-beta T cell activation	7/605	78/18870	0.0124742	0.0620615	0.0460921	CD86/RIPK2/CD274/ASCL2/IL18/HLX/CD83	7	0.897436
GO:2000736	BP	GO:2000736	regulation of stem cell differentiation	7/605	78/18870	0.0124742	0.0620615	0.0460921	EZH2/EIF2AK2/HDAC2/RBBP7/NUDT21/METTL3/PRKDC	7	0.897436
GO:0031396	BP	GO:0031396	regulation of protein ubiquitination	13/605	200/18870	0.0125987	0.0626135	0.0465021	FANCI/FBXO5/BRCA1/UBE2C/MAD2L1/NMI/CDC20/RIPK2/FANCM/UBE2S/GCLC/PAXIP1/BIRC3	13	0.65
GO:0015980	BP	GO:0015980	energy derivation by oxidation of organic compounds	19/605	337/18870	0.0128108	0.0635988	0.0472339	CDK1/CCNB1/BID/DGUOK/COX7B/DYRK2/UQCR10/NDUFA6/GYS2/AGL/FH/PYGB/BNIP3/PPP1R3C/MSH2/NDUFA7/SDHB/IFNAR1/NDP	19	0.563798
GO:0046640	BP	GO:0046640	regulation of alpha-beta T cell proliferation	5/605	44/18870	0.0129041	0.0639243	0.0474756	RIPK2/CD274/SYK/IL18/PTPRC	5	1.13636
GO:2000516	BP	GO:2000516	positive regulation of CD4-positive, alpha-beta T cell activation	5/605	44/18870	0.0129041	0.0639243	0.0474756	CD86/RIPK2/IL18/HLX/CD83	5	1.13636
GO:0003171	BP	GO:0003171	atrioventricular valve development	4/605	29/18870	0.0131487	0.0649268	0.0482201	SLIT3/AXIN2/OLFM1/HEY2	4	1.37931
GO:0035872	BP	GO:0035872	nucleotide-binding domain, leucine rich repeat containing receptor signaling pathway	4/605	29/18870	0.0131487	0.0649268	0.0482201	RIPK2/TLR4/OTULIN/BIRC3	4	1.37931
GO:0045830	BP	GO:0045830	positive regulation of isotype switching	4/605	29/18870	0.0131487	0.0649268	0.0482201	MLH1/MSH2/PAXIP1/PTPRC	4	1.37931
GO:0003179	BP	GO:0003179	heart valve morphogenesis	6/605	61/18870	0.0132299	0.065119	0.0483629	RB1/SLIT3/ROBO1/AXIN2/OLFM1/HEY2	6	0.983607
GO:1904356	BP	GO:1904356	regulation of telomere maintenance via telomere lengthening	6/605	61/18870	0.0132299	0.065119	0.0483629	NEK2/PARP1/AURKB/ATR/PIF1/ATM	6	0.983607
GO:1905517	BP	GO:1905517	macrophage migration	6/605	61/18870	0.0132299	0.065119	0.0483629	C3AR1/P2RX4/SLAMF8/PTK2/EDN2/CD200	6	0.983607
GO:0045685	BP	GO:0045685	regulation of glial cell differentiation	7/605	79/18870	0.0133207	0.065423	0.0485887	CDK1/HDAC2/TLR2/CXCR4/TP73/ID4/ID2	7	0.886076
GO:2001057	BP	GO:2001057	reactive nitrogen species metabolic process	7/605	79/18870	0.0133207	0.065423	0.0485887	GCH1/SMAD3/P2RX4/TLR4/TLR2/HBB/CLU	7	0.886076
GO:0006750	BP	GO:0006750	glutathione biosynthetic process	3/605	16/18870	0.0134478	0.065423	0.0485887	GCLC/GCLM/SLC1A2	3	1.875
GO:0009151	BP	GO:0009151	purine deoxyribonucleotide metabolic process	3/605	16/18870	0.0134478	0.065423	0.0485887	DCK/DGUOK/PNP	3	1.875
GO:0010958	BP	GO:0010958	regulation of amino acid import across plasma membrane	3/605	16/18870	0.0134478	0.065423	0.0485887	ARL6IP1/SLC38A1/SLC7A5	3	1.875
GO:0023035	BP	GO:0023035	CD40 signaling pathway	3/605	16/18870	0.0134478	0.065423	0.0485887	FANCD2/FANCA/CD86	3	1.875
GO:0035729	BP	GO:0035729	cellular response to hepatocyte growth factor stimulus	3/605	16/18870	0.0134478	0.065423	0.0485887	GCLC/MED1/GCLM	3	1.875
GO:0043517	BP	GO:0043517	positive regulation of DNA damage response, signal transduction by p53 class mediator	3/605	16/18870	0.0134478	0.065423	0.0485887	ATR/ATM/PMAIP1	3	1.875
GO:0051770	BP	GO:0051770	positive regulation of nitric-oxide synthase biosynthetic process	3/605	16/18870	0.0134478	0.065423	0.0485887	STAT1/TLR4/TLR2	3	1.875
GO:0070230	BP	GO:0070230	positive regulation of lymphocyte apoptotic process	3/605	16/18870	0.0134478	0.065423	0.0485887	BAX/BCL2L11/CD274	3	1.875
GO:1903789	BP	GO:1903789	regulation of amino acid transmembrane transport	3/605	16/18870	0.0134478	0.065423	0.0485887	ARL6IP1/SLC38A1/SLC7A5	3	1.875
GO:0003018	BP	GO:0003018	vascular process in circulatory system	16/605	269/18870	0.0134705	0.0654645	0.0486195	GCH1/ATP2B1/SLC7A2/SLC38A1/EDN3/SLC2A1/SLC7A5/EDN2/GCLC/TACR1/HBB/PTP4A3/CXCR2/GCLM/SLC1A2/CD38	16	0.594796
GO:1903707	BP	GO:1903707	negative regulation of hemopoiesis	9/605	118/18870	0.0137081	0.0665495	0.0494253	LRRC17/TLR4/CTLA4/ASCL2/HLX/MYC/ID2/GATA2/PIK3R1	9	0.762712
GO:0002699	BP	GO:0002699	positive regulation of immune effector process	16/605	270/18870	0.0139106	0.0674613	0.0501025	CD86/RIPK2/TLR4/RASGRP1/MLH1/MSH2/SLC7A5/PAXIP1/SYK/IRF5/TAP2/IL18/HLX/CD177/PTPRC/GATA2	16	0.592593
GO:0007020	BP	GO:0007020	microtubule nucleation	5/605	45/18870	0.0141446	0.0683089	0.050732	CENPJ/MZT1/TPX2/CKAP5/TUBG1	5	1.11111
GO:0045687	BP	GO:0045687	positive regulation of glial cell differentiation	5/605	45/18870	0.0141446	0.0683089	0.050732	HDAC2/TLR2/CXCR4/TP73/ID2	5	1.11111
GO:0048713	BP	GO:0048713	regulation of oligodendrocyte differentiation	5/605	45/18870	0.0141446	0.0683089	0.050732	HDAC2/TLR2/CXCR4/TP73/ID4	5	1.11111
GO:1905521	BP	GO:1905521	regulation of macrophage migration	5/605	45/18870	0.0141446	0.0683089	0.050732	C3AR1/P2RX4/SLAMF8/PTK2/CD200	5	1.11111
GO:0032731	BP	GO:0032731	positive regulation of interleukin-1 beta production	6/605	62/18870	0.0142626	0.0688065	0.0511016	IFI16/CASP8/SMAD3/EGR1/RIPK2/TLR4	6	0.967742
GO:0032609	BP	GO:0032609	type II interferon production	9/605	119/18870	0.0144234	0.0694371	0.0515699	CD14/RIPK2/TLR4/CD274/RASGRP1/SLC7A5/IL18/IL12RB2/HLA-DPA1	9	0.756303
GO:0032649	BP	GO:0032649	regulation of type II interferon production	9/605	119/18870	0.0144234	0.0694371	0.0515699	CD14/RIPK2/TLR4/CD274/RASGRP1/SLC7A5/IL18/IL12RB2/HLA-DPA1	9	0.756303
GO:0002703	BP	GO:0002703	regulation of leukocyte mediated immunity	15/605	249/18870	0.0147615	0.0709908	0.0527238	CR2/TLR4/RASGRP1/MLH1/MSH2/PAXIP1/SYK/TAP2/IL18/AHR/CD177/IL7R/PTPRC/BST2/GATA2	15	0.60241
GO:1901798	BP	GO:1901798	positive regulation of signal transduction by p53 class mediator	4/605	30/18870	0.0147957	0.0710812	0.0527909	ATR/ATM/MYC/PMAIP1	4	1.33333
GO:0090090	BP	GO:0090090	negative regulation of canonical Wnt signaling pathway	10/605	140/18870	0.0148304	0.0711736	0.0528596	STK3/G3BP1/STK4/EGR1/IGFBP6/SOX2/CTHRC1/GPC3/AXIN2/FRZB	10	0.714286
GO:0016570	BP	GO:0016570	histone modification	9/605	120/18870	0.0151659	0.0726323	0.0539429	UHRF1/DEK/BRCA1/SUV39H1/HDAC2/RBBP7/AURKB/SET/GATA2	9	0.75
GO:0071346	BP	GO:0071346	cellular response to type II interferon	9/605	120/18870	0.0151659	0.0726323	0.0539429	IFNGR1/STAT1/TLR4/TLR2/CCL4/CCL22/CCL18/MED1/HLA-DPA1	9	0.75
GO:0032623	BP	GO:0032623	interleukin-2 production	6/605	63/18870	0.01535	0.0732102	0.0543721	CD86/RIPK2/IL1A/PNP/PTPRC/CD83	6	0.952381
GO:0032663	BP	GO:0032663	regulation of interleukin-2 production	6/605	63/18870	0.01535	0.0732102	0.0543721	CD86/RIPK2/IL1A/PNP/PTPRC/CD83	6	0.952381
GO:0032757	BP	GO:0032757	positive regulation of interleukin-8 production	6/605	63/18870	0.01535	0.0732102	0.0543721	CD14/F3/TLR4/TLR2/SYK/CHI3L1	6	0.952381
GO:0140895	BP	GO:0140895	cell surface toll-like receptor signaling pathway	6/605	63/18870	0.01535	0.0732102	0.0543721	NMI/CD14/RIPK2/TLR4/TLR2/PIK3R1	6	0.952381
GO:0085029	BP	GO:0085029	extracellular matrix assembly	5/605	46/18870	0.0154628	0.073596	0.0546586	SMAD3/MYH11/LOX/QSOX1/HAS2	5	1.08696
GO:1901861	BP	GO:1901861	regulation of muscle tissue development	5/605	46/18870	0.0154628	0.073596	0.0546586	CENPF/SMAD3/IGFBP5/LOX/LEF1	5	1.08696
GO:0002449	BP	GO:0002449	lymphocyte mediated immunity	20/605	368/18870	0.0156416	0.07437	0.0552335	EXO1/RNF168/CR2/HPRT1/C1QB/FCER1G/RASGRP1/MLH1/MSH2/TUBB/PAXIP1/IRF7/TAP2/IL18/AHR/GZMB/CLU/IL7R/PTPRC/CD27	20	0.543478
GO:0048771	BP	GO:0048771	tissue remodeling	12/605	184/18870	0.0157587	0.0747435	0.0555109	BAX/EPAS1/IL1A/CTHRC1/SPP1/PRKCA/IGFBP5/SYK/IL18/TNFSF11/NDP/CD38	12	0.652174
GO:0051495	BP	GO:0051495	positive regulation of cytoskeleton organization	12/605	184/18870	0.0157587	0.0747435	0.0555109	STIL/PLK4/SPAG5/CENPJ/PSRC1/GPSM2/SMAD3/CKAP5/CCDC88A/CSF3/TACR1/MET	12	0.652174
GO:0044703	BP	GO:0044703	multi-organism reproductive process	13/605	206/18870	0.0157726	0.0747435	0.0555109	PARP1/SP3/MMP9/UMPS/ESR1/SPP1/SLC38A1/SLC2A1/IGFBP5/TACR1/MED1/NDP/CD38	13	0.631068
GO:0031348	BP	GO:0031348	negative regulation of defense response	18/605	321/18870	0.0159124	0.0747435	0.0555109	PARP1/IFI16/RB1/CNOT7/NMI/AURKB/SMAD3/PBK/MMP12/METTL3/PRKDC/SLAMF8/OTULIN/LYAR/SYK/CD200/AHR/PTPRC	18	0.560748
GO:0000712	BP	GO:0000712	resolution of meiotic recombination intermediates	3/605	17/18870	0.015947	0.0747435	0.0555109	TOP2A/FANCM/MLH1	3	1.76471
GO:0007252	BP	GO:0007252	I-kappaB phosphorylation	3/605	17/18870	0.015947	0.0747435	0.0555109	PRDX4/TLR4/TLR2	3	1.76471
GO:0032310	BP	GO:0032310	prostaglandin secretion	3/605	17/18870	0.015947	0.0747435	0.0555109	P2RX4/IL1A/TNFSF11	3	1.76471
GO:0034035	BP	GO:0034035	purine ribonucleoside bisphosphate metabolic process	3/605	17/18870	0.015947	0.0747435	0.0555109	BPNT1/TPST2/SULT2B1	3	1.76471
GO:0036005	BP	GO:0036005	response to macrophage colony-stimulating factor	3/605	17/18870	0.015947	0.0747435	0.0555109	TLR4/TLR2/SPP1	3	1.76471
GO:0050427	BP	GO:0050427	3'-phosphoadenosine 5'-phosphosulfate metabolic process	3/605	17/18870	0.015947	0.0747435	0.0555109	BPNT1/TPST2/SULT2B1	3	1.76471
GO:0051447	BP	GO:0051447	negative regulation of meiotic cell cycle	3/605	17/18870	0.015947	0.0747435	0.0555109	TTK/TRIP13/FBXO5	3	1.76471
GO:0097067	BP	GO:0097067	cellular response to thyroid hormone stimulus	3/605	17/18870	0.015947	0.0747435	0.0555109	GCLC/MED1/GCLM	3	1.76471
GO:0120305	BP	GO:0120305	regulation of pigmentation	3/605	17/18870	0.015947	0.0747435	0.0555109	BAX/BCL2L11/EDN3	3	1.76471
GO:1902036	BP	GO:1902036	regulation of hematopoietic stem cell differentiation	3/605	17/18870	0.015947	0.0747435	0.0555109	EIF2AK2/METTL3/PRKDC	3	1.76471
GO:0043393	BP	GO:0043393	regulation of protein binding	10/605	142/18870	0.0162364	0.0760226	0.0564609	AURKA/STK3/STK4/BAX/AURKB/RIPK2/MMP9/HIPK2/CSF3/RAN	10	0.704225
GO:0045766	BP	GO:0045766	positive regulation of angiogenesis	12/605	185/18870	0.0163801	0.07654	0.0568451	BRCA1/C3AR1/F3/IL1A/HIPK2/PRKCA/CXCL8/CXCR4/CHI3L1/ENG/CXCR2/GATA2	12	0.648649
GO:1904018	BP	GO:1904018	positive regulation of vasculature development	12/605	185/18870	0.0163801	0.07654	0.0568451	BRCA1/C3AR1/F3/IL1A/HIPK2/PRKCA/CXCL8/CXCR4/CHI3L1/ENG/CXCR2/GATA2	12	0.648649
GO:0048247	BP	GO:0048247	lymphocyte chemotaxis	6/605	64/18870	0.0164936	0.0769145	0.0571232	CCL4/CXCL10/GPR183/CCL22/CCL18/CXCL11	6	0.9375
GO:2000630	BP	GO:2000630	positive regulation of miRNA metabolic process	6/605	64/18870	0.0164936	0.0769145	0.0571232	FOXA1/SMAD3/EGR1/MYB/MYC/GATA2	6	0.9375
GO:0002825	BP	GO:0002825	regulation of T-helper 1 type immune response	4/605	31/18870	0.0165674	0.0769477	0.0571479	RIPK2/ASCL2/IL18/HLX	4	1.29032
GO:0033688	BP	GO:0033688	regulation of osteoblast proliferation	4/605	31/18870	0.0165674	0.0769477	0.0571479	EIF2AK2/SMAD3/CTHRC1/AXIN2	4	1.29032
GO:0090322	BP	GO:0090322	regulation of superoxide metabolic process	4/605	31/18870	0.0165674	0.0769477	0.0571479	DHFR/GCH1/SYK/CD177	4	1.29032
GO:2000191	BP	GO:2000191	regulation of fatty acid transport	4/605	31/18870	0.0165674	0.0769477	0.0571479	P2RX4/IL1A/SYK/TNFSF11	4	1.29032
GO:0043254	BP	GO:0043254	regulation of protein-containing complex assembly	22/605	419/18870	0.0166863	0.0774217	0.0574999	STMN1/KIF14/HJURP/RB1/EIF2AK2/DUT/BID/PSRC1/BAX/BCL2L11/CKAP5/NRG1/ATR/TLR4/CSF3/BMF/SYK/SELP/CRYAB/ATM/MET/CLU	22	0.52506
GO:0014897	BP	GO:0014897	striated muscle hypertrophy	8/605	102/18870	0.016786	0.0776831	0.0576941	EZH2/PARP1/HDAC2/SMAD3/P2RX4/PRKCA/IGFBP5/HEY2	8	0.784314
GO:0003254	BP	GO:0003254	regulation of membrane depolarization	5/605	47/18870	0.0168605	0.0776831	0.0576941	PARP1/SCN1B/GCLC/MLLT11/GCLM	5	1.06383
GO:0010824	BP	GO:0010824	regulation of centrosome duplication	5/605	47/18870	0.0168605	0.0776831	0.0576941	STIL/PLK4/BRCA1/CENPJ/CCNF	5	1.06383
GO:0043029	BP	GO:0043029	T cell homeostasis	5/605	47/18870	0.0168605	0.0776831	0.0576941	CCNB2/BAX/BCL2L11/IL7R/PMAIP1	5	1.06383
GO:0046633	BP	GO:0046633	alpha-beta T cell proliferation	5/605	47/18870	0.0168605	0.0776831	0.0576941	RIPK2/CD274/SYK/IL18/PTPRC	5	1.06383
GO:0140353	BP	GO:0140353	lipid export from cell	5/605	47/18870	0.0168605	0.0776831	0.0576941	P2RX4/IL1A/MYB/SPP1/TNFSF11	5	1.06383
GO:1905314	BP	GO:1905314	semi-lunar valve development	5/605	47/18870	0.0168605	0.0776831	0.0576941	RB1/SLIT3/ROBO1/AXIN2/HEY2	5	1.06383
GO:0007565	BP	GO:0007565	female pregnancy	12/605	186/18870	0.0170198	0.0783388	0.058181	PARP1/SP3/MMP9/UMPS/ESR1/SPP1/SLC38A1/SLC2A1/IGFBP5/MED1/NDP/CD38	12	0.645161
GO:0061138	BP	GO:0061138	morphogenesis of a branching epithelium	12/605	187/18870	0.0176782	0.0812598	0.0603504	TIMELESS/STK4/FOXA1/ESR1/PPP3R1/LEF1/GPC3/ENG/MED1/MYC/MET/LAMA1	12	0.641711
GO:0006304	BP	GO:0006304	DNA modification	8/605	103/18870	0.0177073	0.0812598	0.0603504	EZH2/HELLS/PARP1/MBD4/DNMT1/MTRR/ALKBH2/DNMT3A	8	0.776699
GO:0035282	BP	GO:0035282	segmentation	8/605	103/18870	0.0177073	0.0812598	0.0603504	MESP2/SMAD3/MTF2/PALB2/PRKDC/LEF1/ATM/AXIN2	8	0.776699
GO:0010660	BP	GO:0010660	regulation of muscle cell apoptotic process	7/605	84/18870	0.0181788	0.0833408	0.0618959	CDKN2A/DNMT1/BNIP3/SLC7A5/E2F3/HEY2/CXCR2	7	0.833333
GO:0019722	BP	GO:0019722	calcium-mediated signaling	13/605	210/18870	0.0182045	0.0833757	0.0619219	DYRK2/CXCR3/P2RX4/PPP3R1/CXCL8/CXCR4/EDN2/CCL4/SYK/SELP/TNFSF11/PTPRC/CXCR2	13	0.619048
GO:0022904	BP	GO:0022904	respiratory electron transport chain	9/605	124/18870	0.0184187	0.0837647	0.0622108	CDK1/CCNB1/BID/DGUOK/COX7B/UQCR10/NDUFA6/NDUFA7/SDHB	9	0.725806
GO:0038127	BP	GO:0038127	ERBB signaling pathway	9/605	124/18870	0.0184187	0.0837647	0.0622108	EREG/NRG1/MMP9/TGFA/PLAUR/PTK2/CCDC88A/HBEGF/ERRFI1	9	0.725806
GO:0002431	BP	GO:0002431	Fc receptor mediated stimulatory signaling pathway	4/605	32/18870	0.0184664	0.0837647	0.0622108	FCER1G/PTK2/SYK/PTPRC	4	1.25
GO:0006308	BP	GO:0006308	DNA catabolic process	4/605	32/18870	0.0184664	0.0837647	0.0622108	BAX/APAF1/ISG20/ATM	4	1.25
GO:0034391	BP	GO:0034391	regulation of smooth muscle cell apoptotic process	4/605	32/18870	0.0184664	0.0837647	0.0622108	CDKN2A/DNMT1/SLC7A5/E2F3	4	1.25
GO:0061384	BP	GO:0061384	heart trabecula morphogenesis	4/605	32/18870	0.0184664	0.0837647	0.0622108	NRG1/ENG/MED1/HEY2	4	1.25
GO:0090169	BP	GO:0090169	regulation of spindle assembly	4/605	32/18870	0.0184664	0.0837647	0.0622108	STIL/SPAG5/CENPJ/GPSM2	4	1.25
GO:0014896	BP	GO:0014896	muscle hypertrophy	8/605	104/18870	0.0186643	0.0837647	0.0622108	EZH2/PARP1/HDAC2/SMAD3/P2RX4/PRKCA/IGFBP5/HEY2	8	0.769231
GO:0032204	BP	GO:0032204	regulation of telomere maintenance	8/605	104/18870	0.0186643	0.0837647	0.0622108	NEK2/PARP1/AURKB/SMC6/ATR/PIF1/ATM/MYC	8	0.769231
GO:1990830	BP	GO:1990830	cellular response to leukemia inhibitory factor	8/605	104/18870	0.0186643	0.0837647	0.0622108	MYBL2/HELLS/NEFH/MTF2/PCOLCE2/TNFSF11/PTP4A3/GCLM	8	0.769231
GO:0006044	BP	GO:0006044	N-acetylglucosamine metabolic process	3/605	18/18870	0.0186891	0.0837647	0.0622108	CHST4/CHST2/NANP	3	1.66667
GO:0009125	BP	GO:0009125	nucleoside monophosphate catabolic process	3/605	18/18870	0.0186891	0.0837647	0.0622108	HPRT1/DPYD/PNP	3	1.66667
GO:0019184	BP	GO:0019184	nonribosomal peptide biosynthetic process	3/605	18/18870	0.0186891	0.0837647	0.0622108	GCLC/GCLM/SLC1A2	3	1.66667
GO:0032604	BP	GO:0032604	granulocyte macrophage colony-stimulating factor production	3/605	18/18870	0.0186891	0.0837647	0.0622108	RASGRP1/SYK/IL18	3	1.66667
GO:0032645	BP	GO:0032645	regulation of granulocyte macrophage colony-stimulating factor production	3/605	18/18870	0.0186891	0.0837647	0.0622108	RASGRP1/SYK/IL18	3	1.66667
GO:0035728	BP	GO:0035728	response to hepatocyte growth factor	3/605	18/18870	0.0186891	0.0837647	0.0622108	GCLC/MED1/GCLM	3	1.66667
GO:0043117	BP	GO:0043117	positive regulation of vascular permeability	3/605	18/18870	0.0186891	0.0837647	0.0622108	TACR1/PTP4A3/CXCR2	3	1.66667
GO:0046040	BP	GO:0046040	IMP metabolic process	3/605	18/18870	0.0186891	0.0837647	0.0622108	HPRT1/PAICS/PNP	3	1.66667
GO:0071371	BP	GO:0071371	cellular response to gonadotropin stimulus	3/605	18/18870	0.0186891	0.0837647	0.0622108	CCNA2/GCLC/GCLM	3	1.66667
GO:1904031	BP	GO:1904031	positive regulation of cyclin-dependent protein kinase activity	3/605	18/18870	0.0186891	0.0837647	0.0622108	PSRC1/CCND1/CCND2	3	1.66667
GO:1905288	BP	GO:1905288	vascular associated smooth muscle cell apoptotic process	3/605	18/18870	0.0186891	0.0837647	0.0622108	DNMT1/SLC7A5/E2F3	3	1.66667
GO:1905459	BP	GO:1905459	regulation of vascular associated smooth muscle cell apoptotic process	3/605	18/18870	0.0186891	0.0837647	0.0622108	DNMT1/SLC7A5/E2F3	3	1.66667
GO:0045069	BP	GO:0045069	regulation of viral genome replication	7/605	85/18870	0.0192822	0.0862554	0.0640606	TOP2A/IFI16/EIF2AK2/CNOT7/ISG20/CXCL8/BST2	7	0.823529
GO:0061515	BP	GO:0061515	myeloid cell development	7/605	85/18870	0.0192822	0.0862554	0.0640606	MYB/TLR2/LYAR/FAM20C/TNFSF11/MED1/EVI2B	7	0.823529
GO:0072089	BP	GO:0072089	stem cell proliferation	9/605	125/18870	0.0193055	0.086276	0.0640759	CDKN2C/HMGB2/EIF2AK2/CCNE1/BRCA2/AXIN2/PTPRC/BABAM1/EPCAM	9	0.72
GO:0002764	BP	GO:0002764	immune response-regulating signaling pathway	25/605	500/18870	0.0194564	0.0868662	0.0645142	CR2/EIF2AK2/C3AR1/NMI/BAX/CD14/RIPK2/TLR4/ESR1/TLR2/CD3G/FCER1G/OTULIN/PTK2/ITK/CD3D/SYK/IRF7/CTLA4/LCP2/PTPRC/GPLD1/CD38/BIRC3/PIK3R1	25	0.5
GO:0050792	BP	GO:0050792	regulation of viral process	11/605	168/18870	0.0197436	0.0880633	0.0654033	TOP2A/IFI16/KPNA2/LAMP3/EIF2AK2/CNOT7/STAT1/ISG20/CXCL8/CXCR4/BST2	11	0.654762
GO:2001242	BP	GO:2001242	regulation of intrinsic apoptotic signaling pathway	12/605	190/18870	0.0197682	0.088088	0.0654217	HELLS/PARP1/BID/BAX/BCL2L11/MMP9/PLAUR/OPA1/CXCL12/MYC/CLU/PMAIP1	12	0.631579
GO:0001774	BP	GO:0001774	microglial cell activation	5/605	49/18870	0.0199016	0.0881713	0.0654835	IFNGR1/TLR2/ATM/CLU/PTPRC	5	1.02041
GO:0010518	BP	GO:0010518	positive regulation of phospholipase activity	5/605	49/18870	0.0199016	0.0881713	0.0654835	CD86/ESR1/ITK/ANG/ABL2	5	1.02041
GO:0010543	BP	GO:0010543	regulation of platelet activation	5/605	49/18870	0.0199016	0.0881713	0.0654835	TLR4/FCER1G/PRKCA/SYK/SELP	5	1.02041
GO:0042220	BP	GO:0042220	response to cocaine	5/605	49/18870	0.0199016	0.0881713	0.0654835	CCNA2/HDAC2/HOMER1/DNMT3A/SLC1A2	5	1.02041
GO:0046850	BP	GO:0046850	regulation of bone remodeling	5/605	49/18870	0.0199016	0.0881713	0.0654835	SPP1/PRKCA/SYK/TNFSF11/CD38	5	1.02041
GO:0048286	BP	GO:0048286	lung alveolus development	5/605	49/18870	0.0199016	0.0881713	0.0654835	FOXA1/MMP12/IGFBP5/EDN2/ERRFI1	5	1.02041
GO:2000377	BP	GO:2000377	regulation of reactive oxygen species metabolic process	10/605	147/18870	0.0201814	0.089325	0.0663403	DHFR/BRCA1/GCH1/FOXM1/TLR4/BNIP3/SYK/CRYAB/CD177/ABCB7	10	0.680272
GO:0034612	BP	GO:0034612	response to tumor necrosis factor	15/605	259/18870	0.0203232	0.0894661	0.0664451	BRCA1/GCH1/CD14/CASP8/STAT1/OTULIN/CXCL8/CCL4/SYK/CHI3L1/CCL22/CCL18/TNFSF11/HAS2/BIRC3	15	0.579151
GO:0007517	BP	GO:0007517	muscle organ development	19/605	354/18870	0.0203873	0.0894661	0.0664451	CENPF/RB1/SMAD3/EGR1/NRG1/ETV1/SAP30/LOX/LEF1/ATF3/CRYAB/CXCL10/HOMER1/HLX/ENG/MED1/HBEGF/HEY2/ID3	19	0.536723
GO:0021700	BP	GO:0021700	developmental maturation	18/605	330/18870	0.0204249	0.0894661	0.0664451	AURKA/TRIP13/FBXO5/KIF14/TYMS/RB1/AKR1B1/BRCA2/FOXA1/CDC20/EREG/EBP/EPAS1/CDC25B/ANG/FAM20C/NR4A2/GATA2	18	0.545455
GO:0033273	BP	GO:0033273	response to vitamin	7/605	86/18870	0.0204315	0.0894661	0.0664451	BRIP1/TYMS/IL1A/SPP1/CXCL10/DNMT3A/MED1	7	0.813953
GO:2000628	BP	GO:2000628	regulation of miRNA metabolic process	7/605	86/18870	0.0204315	0.0894661	0.0664451	FOXA1/SMAD3/EGR1/ESR1/MYB/MYC/GATA2	7	0.813953
GO:2000781	BP	GO:2000781	positive regulation of double-strand break repair	7/605	86/18870	0.0204315	0.0894661	0.0664451	RAD51AP1/PARP1/FOXM1/TIMELESS/FANCB/PRKDC/ING3	7	0.813953
GO:0006346	BP	GO:0006346	DNA methylation-dependent heterochromatin formation	4/605	33/18870	0.020495	0.0894661	0.0664451	HELLS/DNMT1/DNMT3A/MYC	4	1.21212
GO:0033032	BP	GO:0033032	regulation of myeloid cell apoptotic process	4/605	33/18870	0.020495	0.0894661	0.0664451	CDKN2A/CLEC5A/IRF7/CXCR2	4	1.21212
GO:0034390	BP	GO:0034390	smooth muscle cell apoptotic process	4/605	33/18870	0.020495	0.0894661	0.0664451	CDKN2A/DNMT1/SLC7A5/E2F3	4	1.21212
GO:0036336	BP	GO:0036336	dendritic cell migration	4/605	33/18870	0.020495	0.0894661	0.0664451	SLAMF8/CXCR4/GPR183/CXCR2	4	1.21212
GO:0038094	BP	GO:0038094	Fc-gamma receptor signaling pathway	4/605	33/18870	0.020495	0.0894661	0.0664451	FCER1G/PTK2/SYK/PTPRC	4	1.21212
GO:0040020	BP	GO:0040020	regulation of meiotic nuclear division	4/605	33/18870	0.020495	0.0894661	0.0664451	RAD51AP1/TRIP13/FBXO5/CDC20	4	1.21212
GO:0045577	BP	GO:0045577	regulation of B cell differentiation	4/605	33/18870	0.020495	0.0894661	0.0664451	SLAMF8/SYK/CD27/ID2	4	1.21212
GO:0002700	BP	GO:0002700	regulation of production of molecular mediator of immune response	12/605	191/18870	0.0205043	0.0894661	0.0664451	CD86/RIPK2/TLR4/MLH1/MSH2/SLC7A5/PAXIP1/SYK/IRF5/IL18/PTPRC/BST2	12	0.628272
GO:0021543	BP	GO:0021543	pallium development	12/605	191/18870	0.0205043	0.0894661	0.0664451	ASPM/EZH2/KIF14/TRA2B/TACC3/BAX/BNIP3/SLC2A1/ROBO1/LEF1/RAN/ID4	12	0.628272
GO:0048709	BP	GO:0048709	oligodendrocyte differentiation	8/605	106/18870	0.0206882	0.0900984	0.0669147	CDKN2C/HDAC2/TLR2/BNIP3/CXCR4/TP73/CLU/ID4	8	0.754717
GO:1990823	BP	GO:1990823	response to leukemia inhibitory factor	8/605	106/18870	0.0206882	0.0900984	0.0669147	MYBL2/HELLS/NEFH/MTF2/PCOLCE2/TNFSF11/PTP4A3/GCLM	8	0.754717
GO:0006119	BP	GO:0006119	oxidative phosphorylation	10/605	148/18870	0.0210477	0.0915772	0.068013	CDK1/CCNB1/BID/DGUOK/COX7B/UQCR10/NDUFA6/MSH2/NDUFA7/SDHB	10	0.675676
GO:0009142	BP	GO:0009142	nucleoside triphosphate biosynthetic process	9/605	127/18870	0.021171	0.0920272	0.0683472	PARP1/TYMS/LDHC/CTPS1/CMPK2/NDUFA6/DTYMK/NDUFA7/SDHB	9	0.708661
GO:0042149	BP	GO:0042149	cellular response to glucose starvation	5/605	50/18870	0.0215483	0.0934031	0.0693691	SUV39H1/IFI16/SLC2A1/SLC7A5/PMAIP1	5	1
GO:0045910	BP	GO:0045910	negative regulation of DNA recombination	5/605	50/18870	0.0215483	0.0934031	0.0693691	BLM/POLQ/FANCB/MLH1/MSH2	5	1
GO:0089718	BP	GO:0089718	amino acid import across plasma membrane	5/605	50/18870	0.0215483	0.0934031	0.0693691	SLC7A2/ARL6IP1/SLC38A1/SLC7A5/SLC1A2	5	1
GO:0002283	BP	GO:0002283	neutrophil activation involved in immune response	3/605	19/18870	0.0216753	0.0936018	0.0695166	FCER1G/SYK/CD177	3	1.57895
GO:0032305	BP	GO:0032305	positive regulation of icosanoid secretion	3/605	19/18870	0.0216753	0.0936018	0.0695166	P2RX4/IL1A/TNFSF11	3	1.57895
GO:0042053	BP	GO:0042053	regulation of dopamine metabolic process	3/605	19/18870	0.0216753	0.0936018	0.0695166	HPRT1/MAOB/NR4A2	3	1.57895
GO:0070431	BP	GO:0070431	nucleotide-binding oligomerization domain containing 2 signaling pathway	3/605	19/18870	0.0216753	0.0936018	0.0695166	RIPK2/TLR4/OTULIN	3	1.57895
GO:0007173	BP	GO:0007173	epidermal growth factor receptor signaling pathway	8/605	107/18870	0.0217565	0.0937767	0.0696466	EREG/MMP9/TGFA/PLAUR/PTK2/CCDC88A/HBEGF/ERRFI1	8	0.747664
GO:0140888	BP	GO:0140888	interferon-mediated signaling pathway	8/605	107/18870	0.0217565	0.0937767	0.0696466	CNOT7/IFNGR1/STAT1/MMP12/METTL3/IRF7/IFNAR1/MED1	8	0.747664
GO:0031960	BP	GO:0031960	response to corticosteroid	10/605	149/18870	0.0219407	0.0944824	0.0701707	PCNA/PARP1/TYMS/MAOB/BCL2L11/SLIT3/AGL/RAN/AXIN2/PTPRC	10	0.671141
GO:0030856	BP	GO:0030856	regulation of epithelial cell differentiation	11/605	171/18870	0.022178	0.095415	0.0708633	EZH2/CCND1/STAT1/MMP9/IL1A/TP73/MED1/SULT2B1/HEY2/FRZB/ERRFI1	11	0.643275
GO:0044706	BP	GO:0044706	multi-multicellular organism process	13/605	216/18870	0.0223696	0.0961498	0.071409	PARP1/SP3/MMP9/UMPS/ESR1/SPP1/SLC38A1/SLC2A1/IGFBP5/TACR1/MED1/NDP/CD38	13	0.601852
GO:0002828	BP	GO:0002828	regulation of type 2 immune response	4/605	34/18870	0.0226552	0.096389	0.0715866	CD86/ASCL2/IL18/HLX	4	1.17647
GO:0010661	BP	GO:0010661	positive regulation of muscle cell apoptotic process	4/605	34/18870	0.0226552	0.096389	0.0715866	CDKN2A/BNIP3/E2F3/CXCR2	4	1.17647
GO:0032212	BP	GO:0032212	positive regulation of telomere maintenance via telomerase	4/605	34/18870	0.0226552	0.096389	0.0715866	NEK2/AURKB/ATR/ATM	4	1.17647
GO:0034110	BP	GO:0034110	regulation of homotypic cell-cell adhesion	4/605	34/18870	0.0226552	0.096389	0.0715866	PLAUR/PRKCA/SYK/TNFSF11	4	1.17647
GO:0035456	BP	GO:0035456	response to interferon-beta	4/605	34/18870	0.0226552	0.096389	0.0715866	IFI16/STAT1/IFNAR1/BST2	4	1.17647
GO:0043276	BP	GO:0043276	anoikis	4/605	34/18870	0.0226552	0.096389	0.0715866	E2F1/TFDP1/PTK2/BMF	4	1.17647
GO:0060317	BP	GO:0060317	cardiac epithelial to mesenchymal transition	4/605	34/18870	0.0226552	0.096389	0.0715866	ENG/OLFM1/HEY2/HAS2	4	1.17647
GO:0071353	BP	GO:0071353	cellular response to interleukin-4	4/605	34/18870	0.0226552	0.096389	0.0715866	MCM2/LEF1/CDK4/NFIL3	4	1.17647
GO:0090022	BP	GO:0090022	regulation of neutrophil chemotaxis	4/605	34/18870	0.0226552	0.096389	0.0715866	DPP4/C3AR1/CXCL8/CXCR2	4	1.17647
GO:1901658	BP	GO:1901658	glycosyl compound catabolic process	4/605	34/18870	0.0226552	0.096389	0.0715866	GUSB/CDA/DPYD/PNP	4	1.17647
GO:1902624	BP	GO:1902624	positive regulation of neutrophil migration	4/605	34/18870	0.0226552	0.096389	0.0715866	C3AR1/IL1A/CXCL8/CXCR2	4	1.17647
GO:0051607	BP	GO:0051607	defense response to virus	18/605	334/18870	0.0227209	0.0965266	0.0716889	IFI16/G3BP1/EIF2AK2/POLR3C/CNOT7/STAT1/MMP12/ISG20/TLR2/BNIP3/CXCL9/POLR3K/IRF5/IRF7/CXCL10/PTPRC/BST2/PMAIP1	18	0.538922
GO:0051047	BP	GO:0051047	positive regulation of secretion	17/605	310/18870	0.0227294	0.0965266	0.0716889	GABBR1/P2RX4/TLR4/IL1A/MYB/TLR2/SPP1/EDN3/TACR1/ANG/SYK/CXCL12/CD177/TNFSF11/GPLD1/GATA2/CD38	17	0.548387
GO:0051092	BP	GO:0051092	positive regulation of NF-kappaB transcription factor activity	10/605	150/18870	0.022861	0.0969521	0.0720048	EIF2AK2/PRKCI/RIPK2/RPS6KA5/TLR4/TLR2/PIDD1/IL18/TNFSF11/CLU	10	0.666667
GO:0098586	BP	GO:0098586	cellular response to virus	7/605	88/18870	0.0228716	0.0969521	0.0720048	BAX/IFNGR1/SMAD3/MMP12/IRF5/CXCL10/IFNAR1	7	0.795455
GO:0000288	BP	GO:0000288	nuclear-transcribed mRNA catabolic process, deadenylation-dependent decay	6/605	69/18870	0.0230965	0.0978156	0.0726461	EXOSC8/CNOT7/TNKS1BP1/MLH1/CNOT10/CNOT6L	6	0.869565
GO:0140546	BP	GO:0140546	defense response to symbiont	18/605	335/18870	0.0233244	0.0986902	0.0732957	IFI16/G3BP1/EIF2AK2/POLR3C/CNOT7/STAT1/MMP12/ISG20/TLR2/BNIP3/CXCL9/POLR3K/IRF5/IRF7/CXCL10/PTPRC/BST2/PMAIP1	18	0.537313
GO:0070374	BP	GO:0070374	positive regulation of ERK1 and ERK2 cascade	13/605	218/18870	0.0239044	0.101019	0.0750256	RIPK2/NRG1/TLR4/IL1A/PRKCA/RASGRP1/CCL4/GPR183/CHI3L1/CCL22/CCL18/TNFSF11/PTPRC	13	0.59633
GO:0030178	BP	GO:0030178	negative regulation of Wnt signaling pathway	11/605	173/18870	0.0239187	0.101019	0.0750256	STK3/G3BP1/STK4/EGR1/IGFBP6/SOX2/CTHRC1/RNF213/GPC3/AXIN2/FRZB	11	0.635838
GO:0046822	BP	GO:0046822	regulation of nucleocytoplasmic transport	8/605	109/18870	0.0240089	0.101308	0.0752397	CDK1/ECT2/BARD1/APOD/SMAD3/NUP153/RAN/PIK3R1	8	0.733945
GO:0034620	BP	GO:0034620	cellular response to unfolded protein	7/605	89/18870	0.024164	0.101869	0.0756564	EIF2AK2/BAX/EIF2S1/BCL2L11/CCND1/ATF3/PIK3R1	7	0.786517
GO:0002752	BP	GO:0002752	cell surface pattern recognition receptor signaling pathway	6/605	70/18870	0.0246022	0.103527	0.0768877	NMI/CD14/RIPK2/TLR4/TLR2/PIK3R1	6	0.857143
GO:0032922	BP	GO:0032922	circadian regulation of gene expression	6/605	70/18870	0.0246022	0.103527	0.0768877	HDAC2/EGR1/AHR/ID4/ID3/ID2	6	0.857143
GO:0070372	BP	GO:0070372	regulation of ERK1 and ERK2 cascade	17/605	313/18870	0.0246554	0.103568	0.0769184	RIPK2/NRG1/FAM83D/TLR4/IL1A/PRKCA/RASGRP1/CCL4/SYK/ATF3/GPR183/CHI3L1/CCL22/CCL18/TNFSF11/PSCA/PTPRC	17	0.543131
GO:0033033	BP	GO:0033033	negative regulation of myeloid cell apoptotic process	3/605	20/18870	0.0249064	0.103568	0.0769184	CLEC5A/IRF7/CXCR2	3	1.5
GO:0034244	BP	GO:0034244	negative regulation of transcription elongation by RNA polymerase II	3/605	20/18870	0.0249064	0.103568	0.0769184	EZH2/RNF168/PARP1	3	1.5
GO:0035795	BP	GO:0035795	negative regulation of mitochondrial membrane permeability	3/605	20/18870	0.0249064	0.103568	0.0769184	BNIP3/GCLC/ACAA2	3	1.5
GO:0042069	BP	GO:0042069	regulation of catecholamine metabolic process	3/605	20/18870	0.0249064	0.103568	0.0769184	HPRT1/MAOB/NR4A2	3	1.5
GO:0051546	BP	GO:0051546	keratinocyte migration	3/605	20/18870	0.0249064	0.103568	0.0769184	MMP9/HBEGF/HAS2	3	1.5
GO:0051767	BP	GO:0051767	nitric-oxide synthase biosynthetic process	3/605	20/18870	0.0249064	0.103568	0.0769184	STAT1/TLR4/TLR2	3	1.5
GO:0051769	BP	GO:0051769	regulation of nitric-oxide synthase biosynthetic process	3/605	20/18870	0.0249064	0.103568	0.0769184	STAT1/TLR4/TLR2	3	1.5
GO:0055093	BP	GO:0055093	response to hyperoxia	3/605	20/18870	0.0249064	0.103568	0.0769184	HDAC2/BNIP3/SLC7A5	3	1.5
GO:0070242	BP	GO:0070242	thymocyte apoptotic process	3/605	20/18870	0.0249064	0.103568	0.0769184	BAX/BCL2L11/CHEK2	3	1.5
GO:0071474	BP	GO:0071474	cellular hyperosmotic response	3/605	20/18870	0.0249064	0.103568	0.0769184	AKR1B1/SLC2A1/XRCC6	3	1.5
GO:0009119	BP	GO:0009119	ribonucleoside metabolic process	4/605	35/18870	0.0249488	0.103568	0.0769184	HPRT1/DGUOK/CDA/PNP	4	1.14286
GO:0033146	BP	GO:0033146	regulation of intracellular estrogen receptor signaling pathway	4/605	35/18870	0.0249488	0.103568	0.0769184	BRCA1/PARP1/FOXA1/MED1	4	1.14286
GO:0043392	BP	GO:0043392	negative regulation of DNA binding	4/605	35/18870	0.0249488	0.103568	0.0769184	IFI16/E2F1/LEF1/HEY2	4	1.14286
GO:2000406	BP	GO:2000406	positive regulation of T cell migration	4/605	35/18870	0.0249488	0.103568	0.0769184	CXCL12/ABL2/CXCL10/ASCL2	4	1.14286
GO:0002269	BP	GO:0002269	leukocyte activation involved in inflammatory response	5/605	52/18870	0.0251015	0.104014	0.07725	IFNGR1/TLR2/ATM/CLU/PTPRC	5	0.961538
GO:0010823	BP	GO:0010823	negative regulation of mitochondrion organization	5/605	52/18870	0.0251015	0.104014	0.07725	BNIP3/OPA1/GCLC/ACAA2/CLU	5	0.961538
GO:0045445	BP	GO:0045445	myoblast differentiation	8/605	110/18870	0.0251943	0.104305	0.0774661	RB1/NRG1/EPAS1/DTYMK/CXCL9/CXCL10/IL18/ID3	8	0.727273
GO:0043491	BP	GO:0043491	phosphatidylinositol 3-kinase/protein kinase B signal transduction	16/605	290/18870	0.025291	0.104612	0.0776935	STK3/F3/P2RX4/PTK2/CSF3/IGFBP5/PHLDA3/SELP/LOX/IL18/CHI3L1/ENG/TNFSF11/HBEGF/NDP/PIK3R1	16	0.551724
GO:0002440	BP	GO:0002440	production of molecular mediator of immune response	17/605	314/18870	0.025324	0.104655	0.0777254	EXO1/RNF168/POLQ/XRCC4/CD86/RIPK2/TLR4/PRKDC/MLH1/MSH2/SLC7A5/PAXIP1/SYK/IRF5/IL18/PTPRC/BST2	17	0.541401
GO:0045333	BP	GO:0045333	cellular respiration	14/605	243/18870	0.0253989	0.10487	0.0778854	CDK1/CCNB1/BID/DGUOK/COX7B/UQCR10/NDUFA6/FH/BNIP3/MSH2/NDUFA7/SDHB/IFNAR1/NDP	14	0.576132
GO:0046328	BP	GO:0046328	regulation of JNK cascade	9/605	132/18870	0.0263964	0.108891	0.0808717	STK3/RIPK2/TLR4/IL1A/HIPK2/RASGRP1/PRMT1/TNFSF11/CD27	9	0.681818
GO:0010634	BP	GO:0010634	positive regulation of epithelial cell migration	11/605	176/18870	0.0267136	0.110003	0.0816973	P2RX4/MMP9/RIN2/PTK2/PRKCA/TACR1/HBEGF/MET/GPLD1/GATA2/HAS2	11	0.625
GO:0022900	BP	GO:0022900	electron transport chain	11/605	176/18870	0.0267136	0.110003	0.0816973	CDK1/CCNB1/AKR1B1/BID/DGUOK/COX7B/MAOB/UQCR10/NDUFA6/NDUFA7/SDHB	11	0.625
GO:0002220	BP	GO:0002220	innate immune response activating cell surface receptor signaling pathway	7/605	91/18870	0.0268975	0.110661	0.0821865	NMI/CD14/RIPK2/TLR4/TLR2/SYK/PIK3R1	7	0.769231
GO:0002762	BP	GO:0002762	negative regulation of myeloid leukocyte differentiation	5/605	53/18870	0.0270107	0.11083	0.0823119	LRRC17/TLR4/MYC/GATA2/PIK3R1	5	0.943396
GO:0032210	BP	GO:0032210	regulation of telomere maintenance via telomerase	5/605	53/18870	0.0270107	0.11083	0.0823119	NEK2/AURKB/ATR/PIF1/ATM	5	0.943396
GO:0071622	BP	GO:0071622	regulation of granulocyte chemotaxis	5/605	53/18870	0.0270107	0.11083	0.0823119	DPP4/C3AR1/PTK2/CXCL8/CXCR2	5	0.943396
GO:0050767	BP	GO:0050767	regulation of neurogenesis	20/605	390/18870	0.027095	0.111078	0.0824957	ASPM/EZH2/HMGB2/RB1/HDAC2/PRKCI/MYB/TLR2/SPP1/CXCR4/SLC7A5/ROBO1/TP73/CXCL12/LEF1/ASCL2/HEY2/ID4/ID2/GATA2	20	0.512821
GO:0032868	BP	GO:0032868	response to insulin	15/605	269/18870	0.0273461	0.11164	0.0829134	PARP1/RB1/STAT1/TNFSF10/EGR1/PRKCI/ATP2B1/TWIST2/PRKDC/TLR2/SLC2A1/GCLC/NUCKS1/GPLD1/PIK3R1	15	0.557621
GO:0001569	BP	GO:0001569	branching involved in blood vessel morphogenesis	4/605	36/18870	0.0273775	0.11164	0.0829134	STK4/PPP3R1/LEF1/ENG	4	1.11111
GO:0033687	BP	GO:0033687	osteoblast proliferation	4/605	36/18870	0.0273775	0.11164	0.0829134	EIF2AK2/SMAD3/CTHRC1/AXIN2	4	1.11111
GO:0060218	BP	GO:0060218	hematopoietic stem cell differentiation	4/605	36/18870	0.0273775	0.11164	0.0829134	EIF2AK2/METTL3/PRKDC/MED1	4	1.11111
GO:0070670	BP	GO:0070670	response to interleukin-4	4/605	36/18870	0.0273775	0.11164	0.0829134	MCM2/LEF1/CDK4/NFIL3	4	1.11111
GO:1905898	BP	GO:1905898	positive regulation of response to endoplasmic reticulum stress	4/605	36/18870	0.0273775	0.11164	0.0829134	BAX/BCL2L11/PMAIP1/PIK3R1	4	1.11111
GO:0045807	BP	GO:0045807	positive regulation of endocytosis	10/605	155/18870	0.0278848	0.113608	0.0843753	CD14/PPT1/FCER1G/LYAR/SYK/GPC3/IL15RA/CLU/PTPRC/GATA2	10	0.645161
GO:0140747	BP	GO:0140747	regulation of ncRNA transcription	7/605	92/18870	0.0283401	0.114721	0.0852016	FOXA1/SMAD3/EGR1/ESR1/MYB/MYC/GATA2	7	0.76087
GO:0000729	BP	GO:0000729	DNA double-strand break processing	3/605	21/18870	0.0283818	0.114721	0.0852016	BRIP1/BLM/RAD52	3	1.42857
GO:0009067	BP	GO:0009067	aspartate family amino acid biosynthetic process	3/605	21/18870	0.0283818	0.114721	0.0852016	PLOD2/MTRR/GOT2	3	1.42857
GO:0032616	BP	GO:0032616	interleukin-13 production	3/605	21/18870	0.0283818	0.114721	0.0852016	TSLP/LEF1/IL18	3	1.42857
GO:0032656	BP	GO:0032656	regulation of interleukin-13 production	3/605	21/18870	0.0283818	0.114721	0.0852016	TSLP/LEF1/IL18	3	1.42857
GO:0033005	BP	GO:0033005	positive regulation of mast cell activation	3/605	21/18870	0.0283818	0.114721	0.0852016	TSLP/SYK/GATA2	3	1.42857
GO:0035024	BP	GO:0035024	negative regulation of Rho protein signal transduction	3/605	21/18870	0.0283818	0.114721	0.0852016	STMN1/ABL2/MET	3	1.42857
GO:0046128	BP	GO:0046128	purine ribonucleoside metabolic process	3/605	21/18870	0.0283818	0.114721	0.0852016	HPRT1/DGUOK/PNP	3	1.42857
GO:1903975	BP	GO:1903975	regulation of glial cell migration	3/605	21/18870	0.0283818	0.114721	0.0852016	RRAS2/P2RX4/GPR183	3	1.42857
GO:1901222	BP	GO:1901222	regulation of non-canonical NF-kappaB signal transduction	8/605	113/18870	0.0289945	0.116952	0.0868586	EIF2AK2/NMI/CD86/TLR4/TLR2/IL18/PTP4A3/CD27	8	0.707965
GO:0002639	BP	GO:0002639	positive regulation of immunoglobulin production	5/605	54/18870	0.0290098	0.116952	0.0868586	CD86/MLH1/MSH2/PAXIP1/PTPRC	5	0.925926
GO:0030520	BP	GO:0030520	intracellular estrogen receptor signaling pathway	5/605	54/18870	0.0290098	0.116952	0.0868586	BRCA1/PARP1/FOXA1/ESR1/MED1	5	0.925926
GO:0019693	BP	GO:0019693	ribose phosphate metabolic process	20/605	393/18870	0.0290523	0.117021	0.08691	PARP1/HPRT1/LDHC/DCK/CTPS1/BPNT1/PAICS/CDA/NDUFA6/UMPS/PPT1/PRPS1/OPA1/DPYD/RAN/TPST2/NDUFA7/SDHB/PNP/SULT2B1	20	0.508906
GO:0003170	BP	GO:0003170	heart valve development	6/605	73/18870	0.0295079	0.118581	0.0880682	RB1/SLIT3/ROBO1/AXIN2/OLFM1/HEY2	6	0.821918
GO:0006809	BP	GO:0006809	nitric oxide biosynthetic process	6/605	73/18870	0.0295079	0.118581	0.0880682	GCH1/SMAD3/P2RX4/TLR4/HBB/CLU	6	0.821918
GO:0045444	BP	GO:0045444	fat cell differentiation	14/605	248/18870	0.0295167	0.118581	0.0880682	STK3/E2F1/STK4/SMAD3/CCND1/BNIP3/MED1/AXIN2/PLAC8/NR4A2/FRZB/ID4/ID2/GATA2	14	0.564516
GO:0031667	BP	GO:0031667	response to nutrient levels	24/605	495/18870	0.0298172	0.119684	0.0888874	BRIP1/SUV39H1/TYMS/IFI16/EIF2AK2/BAX/EIF2S1/STAT1/APAF1/AGL/IL1A/SOX2/SPP1/BNIP3/SLC2A1/SLC7A5/GCLC/ATF3/CXCL10/IL15RA/DNMT3A/MED1/GCLM/PMAIP1	24	0.484848
GO:0046326	BP	GO:0046326	positive regulation of glucose import	4/605	37/18870	0.0299424	0.119873	0.0890282	PRKCI/GPC3/SLC1A2/PIK3R1	4	1.08108
GO:0051385	BP	GO:0051385	response to mineralocorticoid	4/605	37/18870	0.0299424	0.119873	0.0890282	PARP1/MAOB/RAN/PTPRC	4	1.08108
GO:1904358	BP	GO:1904358	positive regulation of telomere maintenance via telomere lengthening	4/605	37/18870	0.0299424	0.119873	0.0890282	NEK2/AURKB/ATR/ATM	4	1.08108
GO:0030198	BP	GO:0030198	extracellular matrix organization	17/605	321/18870	0.0303932	0.121573	0.0902904	RB1/DPP4/SMAD3/PRDX4/MMP12/MMP9/PRSS2/MYH11/LOX/QSOX1/ENG/AXIN2/COLGALT1/COL5A3/ABI3BP/LAMA1/HAS2	17	0.529595
GO:0001763	BP	GO:0001763	morphogenesis of a branching structure	12/605	203/18870	0.0309963	0.123878	0.0920021	TIMELESS/STK4/FOXA1/ESR1/PPP3R1/LEF1/GPC3/ENG/MED1/MYC/MET/LAMA1	12	0.591133
GO:0002455	BP	GO:0002455	humoral immune response mediated by circulating immunoglobulin	5/605	55/18870	0.0311001	0.12397	0.0920708	EXO1/CR2/C1QB/CLU/PTPRC	5	0.909091
GO:0002686	BP	GO:0002686	negative regulation of leukocyte migration	5/605	55/18870	0.0311001	0.12397	0.0920708	DPP4/APOD/SLAMF8/CXCL12/CD200	5	0.909091
GO:0034142	BP	GO:0034142	toll-like receptor 4 signaling pathway	5/605	55/18870	0.0311001	0.12397	0.0920708	NMI/CD14/RIPK2/TLR4/PIK3R1	5	0.909091
GO:0043062	BP	GO:0043062	extracellular structure organization	17/605	322/18870	0.0311748	0.124161	0.0922123	RB1/DPP4/SMAD3/PRDX4/MMP12/MMP9/PRSS2/MYH11/LOX/QSOX1/ENG/AXIN2/COLGALT1/COL5A3/ABI3BP/LAMA1/HAS2	17	0.52795
GO:0034767	BP	GO:0034767	positive regulation of monoatomic ion transmembrane transport	10/605	158/18870	0.0312515	0.124348	0.0923513	SCN1B/BAX/COX17/P2RX4/PPP3R1/EDN3/CXCL9/GLRX/CXCL10/CXCL11	10	0.632911
GO:0045123	BP	GO:0045123	cellular extravasation	6/605	74/18870	0.0312757	0.124348	0.0923513	CHST4/CXCL12/SELP/CHST2/CD177/SELL	6	0.810811
GO:0001656	BP	GO:0001656	metanephros development	7/605	94/18870	0.0313804	0.12455	0.092501	AKR1B1/STAT1/EGR1/GPC3/MYC/CXCR2/ID3	7	0.744681
GO:0043648	BP	GO:0043648	dicarboxylic acid metabolic process	7/605	94/18870	0.0313804	0.12455	0.092501	DHFR/MTHFD2/MTRR/FH/GCLC/GOT2/GCLM	7	0.744681
GO:0045229	BP	GO:0045229	external encapsulating structure organization	17/605	323/18870	0.0319711	0.126644	0.0940565	RB1/DPP4/SMAD3/PRDX4/MMP12/MMP9/PRSS2/MYH11/LOX/QSOX1/ENG/AXIN2/COLGALT1/COL5A3/ABI3BP/LAMA1/HAS2	17	0.526316
GO:0023019	BP	GO:0023019	signal transduction involved in regulation of gene expression	3/605	22/18870	0.0321003	0.126644	0.0940565	PARP1/SMAD3/EPCAM	3	1.36364
GO:0032042	BP	GO:0032042	mitochondrial DNA metabolic process	3/605	22/18870	0.0321003	0.126644	0.0940565	PARP1/RRM1/TOP3A	3	1.36364
GO:0051151	BP	GO:0051151	negative regulation of smooth muscle cell differentiation	3/605	22/18870	0.0321003	0.126644	0.0940565	DNMT1/EREG/HEY2	3	1.36364
GO:0051443	BP	GO:0051443	positive regulation of ubiquitin-protein transferase activity	3/605	22/18870	0.0321003	0.126644	0.0940565	UBE2C/CDC20/UBE2S	3	1.36364
GO:0051923	BP	GO:0051923	sulfation	3/605	22/18870	0.0321003	0.126644	0.0940565	CHST4/TPST2/SULT2B1	3	1.36364
GO:0060339	BP	GO:0060339	negative regulation of type I interferon-mediated signaling pathway	3/605	22/18870	0.0321003	0.126644	0.0940565	CNOT7/MMP12/METTL3	3	1.36364
GO:0045638	BP	GO:0045638	negative regulation of myeloid cell differentiation	7/605	95/18870	0.0329795	0.129962	0.0965205	LRRC17/TLR4/MYB/PRMT1/MYC/GATA2/PIK3R1	7	0.736842
GO:0042129	BP	GO:0042129	regulation of T cell proliferation	11/605	182/18870	0.0329976	0.129962	0.0965205	BID/CD86/RIPK2/IL1A/CD274/SYK/CTLA4/IL18/PNP/PTPRC/HLA-DPA1	11	0.604396
GO:0016064	BP	GO:0016064	immunoglobulin mediated immune response	12/605	205/18870	0.033063	0.130108	0.0966293	EXO1/RNF168/CR2/C1QB/FCER1G/MLH1/MSH2/PAXIP1/IRF7/CLU/PTPRC/CD27	12	0.585366
GO:0002218	BP	GO:0002218	activation of innate immune response	15/605	276/18870	0.0332372	0.130682	0.0970557	IFI16/EIF2AK2/NMI/CD14/RIPK2/TLR4/ESR1/PRKDC/TLR2/OTULIN/SYK/IRF7/XRCC6/BIRC3/PIK3R1	15	0.543478
GO:1901653	BP	GO:1901653	cellular response to peptide	19/605	374/18870	0.0332704	0.130701	0.0970698	BRIP1/CCNA2/CDC6/PARP1/RB1/TIMELESS/STAT1/PRKCI/RIPK2/ATP2B1/TLR4/PRKDC/PTK2/PRKCA/GCLC/NUCKS1/NR4A2/GPLD1/PIK3R1	19	0.508021
GO:0045191	BP	GO:0045191	regulation of isotype switching	4/605	39/18870	0.0354846	0.139094	0.103303	MLH1/MSH2/PAXIP1/PTPRC	4	1.02564
GO:0045823	BP	GO:0045823	positive regulation of heart contraction	4/605	39/18870	0.0354846	0.139094	0.103303	GCH1/EDN3/EDN2/HEY2	4	1.02564
GO:0006584	BP	GO:0006584	catecholamine metabolic process	5/605	57/18870	0.0355576	0.139094	0.103303	GCH1/HPRT1/MAOB/EPAS1/NR4A2	5	0.877193
GO:0009712	BP	GO:0009712	catechol-containing compound metabolic process	5/605	57/18870	0.0355576	0.139094	0.103303	GCH1/HPRT1/MAOB/EPAS1/NR4A2	5	0.877193
GO:0061900	BP	GO:0061900	glial cell activation	5/605	57/18870	0.0355576	0.139094	0.103303	IFNGR1/TLR2/ATM/CLU/PTPRC	5	0.877193
GO:0016575	BP	GO:0016575	histone deacetylation	3/605	23/18870	0.0360601	0.139873	0.103882	SUV39H1/HDAC2/RBBP7	3	1.30435
GO:0019430	BP	GO:0019430	removal of superoxide radicals	3/605	23/18870	0.0360601	0.139873	0.103882	FANCC/DHFR/GCH1	3	1.30435
GO:0032785	BP	GO:0032785	negative regulation of DNA-templated transcription, elongation	3/605	23/18870	0.0360601	0.139873	0.103882	EZH2/RNF168/PARP1	3	1.30435
GO:0036120	BP	GO:0036120	cellular response to platelet-derived growth factor stimulus	3/605	23/18870	0.0360601	0.139873	0.103882	CCNA2/TLR4/HAS2	3	1.30435
GO:0045061	BP	GO:0045061	thymic T cell selection	3/605	23/18870	0.0360601	0.139873	0.103882	CD3G/CD3D/PTPRC	3	1.30435
GO:0046823	BP	GO:0046823	negative regulation of nucleocytoplasmic transport	3/605	23/18870	0.0360601	0.139873	0.103882	BARD1/APOD/NUP153	3	1.30435
GO:0060252	BP	GO:0060252	positive regulation of glial cell proliferation	3/605	23/18870	0.0360601	0.139873	0.103882	PRKCI/MYB/SLC7A5	3	1.30435
GO:0071636	BP	GO:0071636	positive regulation of transforming growth factor beta production	3/605	23/18870	0.0360601	0.139873	0.103882	SMAD3/MYB/CD200	3	1.30435
GO:1905709	BP	GO:1905709	negative regulation of membrane permeability	3/605	23/18870	0.0360601	0.139873	0.103882	BNIP3/GCLC/ACAA2	3	1.30435
GO:2000193	BP	GO:2000193	positive regulation of fatty acid transport	3/605	23/18870	0.0360601	0.139873	0.103882	P2RX4/IL1A/TNFSF11	3	1.30435
GO:0006334	BP	GO:0006334	nucleosome assembly	8/605	118/18870	0.0361749	0.1402	0.104125	CHAF1A/MCM2/HMGB2/CHAF1B/ASF1B/SET/NASP/HIRA	8	0.677966
GO:0019724	BP	GO:0019724	B cell mediated immunity	12/605	208/18870	0.0363451	0.140742	0.104527	EXO1/RNF168/CR2/C1QB/FCER1G/MLH1/MSH2/PAXIP1/IRF7/CLU/PTPRC/CD27	12	0.576923
GO:0071902	BP	GO:0071902	positive regulation of protein serine/threonine kinase activity	9/605	140/18870	0.0365509	0.14142	0.105031	EZH2/PSRC1/CCND1/TLR4/RASGRP1/EDN3/ROBO1/TNFSF11/CCND2	9	0.642857
GO:0050853	BP	GO:0050853	B cell receptor signaling pathway	6/605	77/18870	0.0369882	0.142992	0.106198	BAX/ITK/SYK/CTLA4/PTPRC/CD38	6	0.779221
GO:0007254	BP	GO:0007254	JNK cascade	10/605	163/18870	0.0374823	0.144359	0.107214	STK3/SMAD3/RIPK2/TLR4/IL1A/HIPK2/RASGRP1/PRMT1/TNFSF11/CD27	10	0.613497
GO:0044409	BP	GO:0044409	entry into host	10/605	163/18870	0.0374823	0.144359	0.107214	CDK1/CR2/DPP4/CD86/NUP153/CXCL8/CXCR4/CLEC5A/SIVA1/ANPEP	10	0.613497
GO:0032102	BP	GO:0032102	negative regulation of response to external stimulus	23/605	481/18870	0.0376027	0.144359	0.107214	PARP1/IFI16/RB1/DPP4/CNOT7/NMI/AURKB/SMAD3/PBK/MMP12/METTL3/PLAUR/PRKDC/SLAMF8/SPP1/OTULIN/LYAR/ROBO1/SYK/CD200/AHR/PTPRC/PLAU	23	0.47817
GO:0003229	BP	GO:0003229	ventricular cardiac muscle tissue development	5/605	58/18870	0.0379265	0.144359	0.107214	NRG1/ENG/MED1/HEY2/ID2	5	0.862069
GO:0031663	BP	GO:0031663	lipopolysaccharide-mediated signaling pathway	5/605	58/18870	0.0379265	0.144359	0.107214	CD14/RIPK2/TLR4/TLR2/PRKCA	5	0.862069
GO:0045428	BP	GO:0045428	regulation of nitric oxide biosynthetic process	5/605	58/18870	0.0379265	0.144359	0.107214	SMAD3/P2RX4/TLR4/HBB/CLU	5	0.862069
GO:0061756	BP	GO:0061756	leukocyte adhesion to vascular endothelial cell	5/605	58/18870	0.0379265	0.144359	0.107214	CHST4/CXCL12/SELP/CHST2/SELL	5	0.862069
GO:0070534	BP	GO:0070534	protein K63-linked ubiquitination	5/605	58/18870	0.0379265	0.144359	0.107214	RNF168/UBE2T/RIPK2/UBE2S/RNF213	5	0.862069
GO:1904064	BP	GO:1904064	positive regulation of cation transmembrane transport	9/605	141/18870	0.0379847	0.144359	0.107214	SCN1B/BAX/P2RX4/PPP3R1/EDN3/CXCL9/GLRX/CXCL10/CXCL11	9	0.638298
GO:0009798	BP	GO:0009798	axis specification	7/605	98/18870	0.0380996	0.144359	0.107214	STIL/AURKA/MESP2/ETS2/GPC3/AXIN2/HEY2	7	0.714286
GO:0001953	BP	GO:0001953	negative regulation of cell-matrix adhesion	4/605	40/18870	0.0384632	0.144359	0.107214	CDKN2A/APOD/MMP12/PIK3R1	4	1
GO:0006730	BP	GO:0006730	one-carbon metabolic process	4/605	40/18870	0.0384632	0.144359	0.107214	DHFR/MTHFD2/TYMS/CA9	4	1
GO:0009069	BP	GO:0009069	serine family amino acid metabolic process	4/605	40/18870	0.0384632	0.144359	0.107214	DHFR/GCLC/GCLM/NDP	4	1
GO:0032570	BP	GO:0032570	response to progesterone	4/605	40/18870	0.0384632	0.144359	0.107214	TYMS/TLR2/TACR1/CD38	4	1
GO:0033028	BP	GO:0033028	myeloid cell apoptotic process	4/605	40/18870	0.0384632	0.144359	0.107214	CDKN2A/CLEC5A/IRF7/CXCR2	4	1
GO:0070232	BP	GO:0070232	regulation of T cell apoptotic process	4/605	40/18870	0.0384632	0.144359	0.107214	BCL2L11/CD274/IL7R/CD27	4	1
GO:1903524	BP	GO:1903524	positive regulation of blood circulation	4/605	40/18870	0.0384632	0.144359	0.107214	GCH1/EDN3/EDN2/HEY2	4	1
GO:0001820	BP	GO:0001820	serotonin secretion	2/605	10/18870	0.0389382	0.144359	0.107214	MAOB/SYK	2	2
GO:0001915	BP	GO:0001915	negative regulation of T cell mediated cytotoxicity	2/605	10/18870	0.0389382	0.144359	0.107214	IL7R/PTPRC	2	2
GO:0009128	BP	GO:0009128	purine nucleoside monophosphate catabolic process	2/605	10/18870	0.0389382	0.144359	0.107214	HPRT1/PNP	2	2
GO:0009169	BP	GO:0009169	purine ribonucleoside monophosphate catabolic process	2/605	10/18870	0.0389382	0.144359	0.107214	HPRT1/PNP	2	2
GO:0010572	BP	GO:0010572	positive regulation of platelet activation	2/605	10/18870	0.0389382	0.144359	0.107214	TLR4/SELP	2	2
GO:0014745	BP	GO:0014745	negative regulation of muscle adaptation	2/605	10/18870	0.0389382	0.144359	0.107214	SMAD3/IGFBP5	2	2
GO:0014820	BP	GO:0014820	tonic smooth muscle contraction	2/605	10/18870	0.0389382	0.144359	0.107214	EDN2/CD38	2	2
GO:0031666	BP	GO:0031666	positive regulation of lipopolysaccharide-mediated signaling pathway	2/605	10/18870	0.0389382	0.144359	0.107214	CD14/PRKCA	2	2
GO:0032025	BP	GO:0032025	response to cobalt ion	2/605	10/18870	0.0389382	0.144359	0.107214	CASP8/BNIP3	2	2
GO:0033314	BP	GO:0033314	mitotic DNA replication checkpoint signaling	2/605	10/18870	0.0389382	0.144359	0.107214	CDC6/CLSPN	2	2
GO:0035066	BP	GO:0035066	positive regulation of histone acetylation	2/605	10/18870	0.0389382	0.144359	0.107214	DEK/BRCA1	2	2
GO:0035907	BP	GO:0035907	dorsal aorta development	2/605	10/18870	0.0389382	0.144359	0.107214	ENG/HEY2	2	2
GO:0036093	BP	GO:0036093	germ cell proliferation	2/605	10/18870	0.0389382	0.144359	0.107214	FANCA/PRDX4	2	2
GO:0042538	BP	GO:0042538	hyperosmotic salinity response	2/605	10/18870	0.0389382	0.144359	0.107214	AKR1B1/XRCC6	2	2
GO:0043174	BP	GO:0043174	nucleoside salvage	2/605	10/18870	0.0389382	0.144359	0.107214	HPRT1/PNP	2	2
GO:0043653	BP	GO:0043653	mitochondrial fragmentation involved in apoptotic process	2/605	10/18870	0.0389382	0.144359	0.107214	BAX/BNIP3	2	2
GO:0045141	BP	GO:0045141	meiotic telomere clustering	2/605	10/18870	0.0389382	0.144359	0.107214	MLH1/ATM	2	2
GO:0048251	BP	GO:0048251	elastic fiber assembly	2/605	10/18870	0.0389382	0.144359	0.107214	MYH11/LOX	2	2
GO:0048340	BP	GO:0048340	paraxial mesoderm morphogenesis	2/605	10/18870	0.0389382	0.144359	0.107214	SMAD3/LEF1	2	2
GO:0051081	BP	GO:0051081	nuclear membrane disassembly	2/605	10/18870	0.0389382	0.144359	0.107214	VRK1/PRKCA	2	2
GO:0055015	BP	GO:0055015	ventricular cardiac muscle cell development	2/605	10/18870	0.0389382	0.144359	0.107214	CDK1/HEY2	2	2
GO:0060068	BP	GO:0060068	vagina development	2/605	10/18870	0.0389382	0.144359	0.107214	BAX/ESR1	2	2
GO:0060525	BP	GO:0060525	prostate glandular acinus development	2/605	10/18870	0.0389382	0.144359	0.107214	FOXA1/ESR1	2	2
GO:0061299	BP	GO:0061299	retina vasculature morphogenesis in camera-type eye	2/605	10/18870	0.0389382	0.144359	0.107214	LAMA1/NDP	2	2
GO:0070099	BP	GO:0070099	regulation of chemokine-mediated signaling pathway	2/605	10/18870	0.0389382	0.144359	0.107214	SLIT3/ROBO1	2	2
GO:0070339	BP	GO:0070339	response to bacterial lipopeptide	2/605	10/18870	0.0389382	0.144359	0.107214	CD14/TLR2	2	2
GO:0071220	BP	GO:0071220	cellular response to bacterial lipoprotein	2/605	10/18870	0.0389382	0.144359	0.107214	CD14/TLR2	2	2
GO:0071221	BP	GO:0071221	cellular response to bacterial lipopeptide	2/605	10/18870	0.0389382	0.144359	0.107214	CD14/TLR2	2	2
GO:0071372	BP	GO:0071372	cellular response to follicle-stimulating hormone stimulus	2/605	10/18870	0.0389382	0.144359	0.107214	GCLC/GCLM	2	2
GO:1902237	BP	GO:1902237	positive regulation of endoplasmic reticulum stress-induced intrinsic apoptotic signaling pathway	2/605	10/18870	0.0389382	0.144359	0.107214	BCL2L11/PMAIP1	2	2
GO:1903943	BP	GO:1903943	regulation of hepatocyte apoptotic process	2/605	10/18870	0.0389382	0.144359	0.107214	RB1/STK4	2	2
GO:1904760	BP	GO:1904760	regulation of myofibroblast differentiation	2/605	10/18870	0.0389382	0.144359	0.107214	PARP1/RB1	2	2
GO:2000121	BP	GO:2000121	regulation of removal of superoxide radicals	2/605	10/18870	0.0389382	0.144359	0.107214	DHFR/GCH1	2	2
GO:2000271	BP	GO:2000271	positive regulation of fibroblast apoptotic process	2/605	10/18870	0.0389382	0.144359	0.107214	BID/BCL2L11	2	2
GO:0009166	BP	GO:0009166	nucleotide catabolic process	6/605	78/18870	0.0390311	0.144587	0.107383	DCTPP1/MBD4/HPRT1/DUT/DPYD/PNP	6	0.769231
GO:0003300	BP	GO:0003300	cardiac muscle hypertrophy	7/605	99/18870	0.0399158	0.14751	0.109553	EZH2/PARP1/HDAC2/SMAD3/P2RX4/PRKCA/HEY2	7	0.707071
GO:0030101	BP	GO:0030101	natural killer cell activation	7/605	99/18870	0.0399158	0.14751	0.109553	SP3/CASP8/RASGRP1/NFIL3/IL18/IL15RA/PTPRC	7	0.707071
GO:0046620	BP	GO:0046620	regulation of organ growth	7/605	99/18870	0.0399158	0.14751	0.109553	CDK1/STK3/STK4/BCL2L11/TP73/HLX/HEY2	7	0.707071
GO:0046390	BP	GO:0046390	ribose phosphate biosynthetic process	13/605	235/18870	0.0402411	0.147839	0.109798	PARP1/HPRT1/LDHC/DCK/CTPS1/PAICS/CDA/NDUFA6/UMPS/PPT1/PRPS1/NDUFA7/SDHB	13	0.553191
GO:0006925	BP	GO:0006925	inflammatory cell apoptotic process	3/605	24/18870	0.0402584	0.147839	0.109798	CDKN2A/IRF7/CXCR2	3	1.25
GO:0009651	BP	GO:0009651	response to salt stress	3/605	24/18870	0.0402584	0.147839	0.109798	AKR1B1/BAX/XRCC6	3	1.25
GO:0010640	BP	GO:0010640	regulation of platelet-derived growth factor receptor signaling pathway	3/605	24/18870	0.0402584	0.147839	0.109798	APOD/F3/LOX	3	1.25
GO:0050686	BP	GO:0050686	negative regulation of mRNA processing	3/605	24/18870	0.0402584	0.147839	0.109798	BARD1/PCBP4/SRSF10	3	1.25
GO:1903241	BP	GO:1903241	U2-type prespliceosome assembly	3/605	24/18870	0.0402584	0.147839	0.109798	SNRPD1/PHF5A/SNRPB	3	1.25
GO:0002823	BP	GO:0002823	negative regulation of adaptive immune response based on somatic recombination of immune receptors built from immunoglobulin superfamily domains	5/605	59/18870	0.0403897	0.147839	0.109798	CR2/ASCL2/AHR/IL7R/PTPRC	5	0.847458
GO:0009948	BP	GO:0009948	anterior/posterior axis specification	5/605	59/18870	0.0403897	0.147839	0.109798	AURKA/MESP2/ETS2/GPC3/HEY2	5	0.847458
GO:0010517	BP	GO:0010517	regulation of phospholipase activity	5/605	59/18870	0.0403897	0.147839	0.109798	CD86/ESR1/ITK/ANG/ABL2	5	0.847458
GO:0031638	BP	GO:0031638	zymogen activation	5/605	59/18870	0.0403897	0.147839	0.109798	IFI16/CASP8/RIPK2/PLAUR/PLAU	5	0.847458
GO:0046686	BP	GO:0046686	response to cadmium ion	5/605	59/18870	0.0403897	0.147839	0.109798	CDK1/PCNA/MMP9/DTYMK/GCLC	5	0.847458
GO:0060135	BP	GO:0060135	maternal process involved in female pregnancy	5/605	59/18870	0.0403897	0.147839	0.109798	PARP1/ESR1/SPP1/MED1/NDP	5	0.847458
GO:1903900	BP	GO:1903900	regulation of viral life cycle	9/605	143/18870	0.0409664	0.149831	0.111277	TOP2A/IFI16/KPNA2/LAMP3/EIF2AK2/CNOT7/ISG20/CXCL8/BST2	9	0.629371
GO:0006022	BP	GO:0006022	aminoglycan metabolic process	8/605	121/18870	0.0410132	0.149883	0.111316	HMMR/GUSB/CLN6/B3GALT6/CHST2/CHI3L1/B3GNT3/HAS2	8	0.661157
GO:0002691	BP	GO:0002691	regulation of cellular extravasation	4/605	41/18870	0.0415806	0.151097	0.112218	CHST4/CXCL12/SELP/CHST2	4	0.97561
GO:0031952	BP	GO:0031952	regulation of protein autophosphorylation	4/605	41/18870	0.0415806	0.151097	0.112218	TNKS1BP1/ENG/PTPRC/ERRFI1	4	0.97561
GO:0042417	BP	GO:0042417	dopamine metabolic process	4/605	41/18870	0.0415806	0.151097	0.112218	GCH1/HPRT1/MAOB/NR4A2	4	0.97561
GO:0043388	BP	GO:0043388	positive regulation of DNA binding	4/605	41/18870	0.0415806	0.151097	0.112218	HMGB2/RB1/MMP9/PLAUR	4	0.97561
GO:0048246	BP	GO:0048246	macrophage chemotaxis	4/605	41/18870	0.0415806	0.151097	0.112218	C3AR1/SLAMF8/PTK2/EDN2	4	0.97561
GO:0051281	BP	GO:0051281	positive regulation of release of sequestered calcium ion into cytosol	4/605	41/18870	0.0415806	0.151097	0.112218	BAX/CXCL9/CXCL10/CXCL11	4	0.97561
GO:1904994	BP	GO:1904994	regulation of leukocyte adhesion to vascular endothelial cell	4/605	41/18870	0.0415806	0.151097	0.112218	CHST4/CXCL12/SELP/CHST2	4	0.97561
GO:0061351	BP	GO:0061351	neural precursor cell proliferation	10/605	166/18870	0.0416075	0.151097	0.112218	RACGAP1/SHCBP1/MELK/ASPM/KIF14/RRM1/LEF1/ID4/ID2/GATA2	10	0.60241
GO:0010038	BP	GO:0010038	response to metal ion	18/605	359/18870	0.0417686	0.151513	0.112526	CDK1/PCNA/ECT2/PARP1/EIF2S1/MAOB/CD14/CASP8/P2RX4/MMP9/DTYMK/IL1A/BNIP3/MNAT1/GCLC/HOMER1/DNMT3A/GPLD1	18	0.501393
GO:0050764	BP	GO:0050764	regulation of phagocytosis	7/605	100/18870	0.0417876	0.151513	0.112526	TLR2/FCER1G/LYAR/SYK/IL15RA/PTPRC/GATA2	7	0.7
GO:0009259	BP	GO:0009259	ribonucleotide metabolic process	19/605	385/18870	0.0425322	0.154018	0.114387	PARP1/HPRT1/LDHC/DCK/CTPS1/BPNT1/PAICS/CDA/NDUFA6/UMPS/PPT1/OPA1/DPYD/RAN/TPST2/NDUFA7/SDHB/PNP/SULT2B1	19	0.493506
GO:0071375	BP	GO:0071375	cellular response to peptide hormone stimulus	16/605	310/18870	0.0425452	0.154018	0.114387	BRIP1/CCNA2/CDC6/PARP1/RB1/STAT1/PRKCI/ATP2B1/PRKDC/PTK2/PRKCA/GCLC/NUCKS1/NR4A2/GPLD1/PIK3R1	16	0.516129
GO:0022612	BP	GO:0022612	gland morphogenesis	8/605	122/18870	0.0427169	0.154518	0.114758	FOXA1/BAX/TGFA/ESR1/IGFBP5/MED1/ID4/LAMA1	8	0.655738
GO:0045604	BP	GO:0045604	regulation of epidermal cell differentiation	5/605	60/18870	0.0429478	0.154989	0.115108	EZH2/MED1/SULT2B1/HEY2/ERRFI1	5	0.833333
GO:0060193	BP	GO:0060193	positive regulation of lipase activity	5/605	60/18870	0.0429478	0.154989	0.115108	CD86/ESR1/ITK/ANG/ABL2	5	0.833333
GO:0080164	BP	GO:0080164	regulation of nitric oxide metabolic process	5/605	60/18870	0.0429478	0.154989	0.115108	SMAD3/P2RX4/TLR4/HBB/CLU	5	0.833333
GO:0051899	BP	GO:0051899	membrane depolarization	6/605	80/18870	0.0433283	0.156239	0.116037	PARP1/SCN1B/P2RX4/GCLC/MLLT11/GCLM	6	0.75
GO:0032755	BP	GO:0032755	positive regulation of interleukin-6 production	7/605	101/18870	0.0437154	0.157512	0.116982	EREG/RIPK2/TLR4/TSLP/IL1A/TLR2/SYK	7	0.693069
GO:0071356	BP	GO:0071356	cellular response to tumor necrosis factor	13/605	238/18870	0.0437862	0.157644	0.11708	BRCA1/CASP8/STAT1/OTULIN/CXCL8/CCL4/SYK/CHI3L1/CCL22/CCL18/TNFSF11/HAS2/BIRC3	13	0.546218
GO:0009164	BP	GO:0009164	nucleoside catabolic process	3/605	25/18870	0.0446921	0.159536	0.118485	CDA/DPYD/PNP	3	1.2
GO:0014856	BP	GO:0014856	skeletal muscle cell proliferation	3/605	25/18870	0.0446921	0.159536	0.118485	NDC80/DSN1/MYB	3	1.2
GO:0036119	BP	GO:0036119	response to platelet-derived growth factor	3/605	25/18870	0.0446921	0.159536	0.118485	CCNA2/TLR4/HAS2	3	1.2
GO:0043302	BP	GO:0043302	positive regulation of leukocyte degranulation	3/605	25/18870	0.0446921	0.159536	0.118485	SYK/CD177/GATA2	3	1.2
GO:0045662	BP	GO:0045662	negative regulation of myoblast differentiation	3/605	25/18870	0.0446921	0.159536	0.118485	CXCL10/IL18/ID3	3	1.2
GO:0046697	BP	GO:0046697	decidualization	3/605	25/18870	0.0446921	0.159536	0.118485	PARP1/SPP1/NDP	3	1.2
GO:0071450	BP	GO:0071450	cellular response to oxygen radical	3/605	25/18870	0.0446921	0.159536	0.118485	FANCC/DHFR/GCH1	3	1.2
GO:0071451	BP	GO:0071451	cellular response to superoxide	3/605	25/18870	0.0446921	0.159536	0.118485	FANCC/DHFR/GCH1	3	1.2
GO:0071676	BP	GO:0071676	negative regulation of mononuclear cell migration	3/605	25/18870	0.0446921	0.159536	0.118485	APOD/SLAMF8/CD200	3	1.2
GO:0090023	BP	GO:0090023	positive regulation of neutrophil chemotaxis	3/605	25/18870	0.0446921	0.159536	0.118485	C3AR1/CXCL8/CXCR2	3	1.2
GO:1905063	BP	GO:1905063	regulation of vascular associated smooth muscle cell differentiation	3/605	25/18870	0.0446921	0.159536	0.118485	DNMT1/ENG/HEY2	3	1.2
GO:0050850	BP	GO:0050850	positive regulation of calcium-mediated signaling	4/605	42/18870	0.0448366	0.159928	0.118776	P2RX4/PPP3R1/CCL4/SYK	4	0.952381
GO:0002720	BP	GO:0002720	positive regulation of cytokine production involved in immune response	6/605	81/18870	0.0455837	0.162323	0.120555	RIPK2/TLR4/SLC7A5/SYK/IRF5/IL18	6	0.740741
GO:0035296	BP	GO:0035296	regulation of tube diameter	9/605	146/18870	0.0457289	0.162323	0.120555	GCH1/ATP2B1/EDN3/EDN2/GCLC/TACR1/HBB/GCLM/CD38	9	0.616438
GO:0045598	BP	GO:0045598	regulation of fat cell differentiation	9/605	146/18870	0.0457289	0.162323	0.120555	STK3/E2F1/STK4/SMAD3/AXIN2/FRZB/ID4/ID2/GATA2	9	0.616438
GO:0097746	BP	GO:0097746	blood vessel diameter maintenance	9/605	146/18870	0.0457289	0.162323	0.120555	GCH1/ATP2B1/EDN3/EDN2/GCLC/TACR1/HBB/GCLM/CD38	9	0.616438
GO:0030111	BP	GO:0030111	regulation of Wnt signaling pathway	17/605	338/18870	0.0457879	0.162323	0.120555	ASPM/DEPDC1B/STK3/G3BP1/STK4/SMAD3/EGR1/IGFBP6/SOX2/TLR2/CTHRC1/OTULIN/RNF213/LEF1/GPC3/AXIN2/FRZB	17	0.502959
GO:0002824	BP	GO:0002824	positive regulation of adaptive immune response based on somatic recombination of immune receptors built from immunoglobulin superfamily domains	8/605	124/18870	0.0462633	0.162323	0.120555	RIPK2/CD274/MLH1/MSH2/PAXIP1/TAP2/IL18/PTPRC	8	0.645161
GO:0001547	BP	GO:0001547	antral ovarian follicle growth	2/605	11/18870	0.0465993	0.162323	0.120555	EREG/ESR1	2	1.81818
GO:0001660	BP	GO:0001660	fever generation	2/605	11/18870	0.0465993	0.162323	0.120555	IL1A/TNFSF11	2	1.81818
GO:0006188	BP	GO:0006188	IMP biosynthetic process	2/605	11/18870	0.0465993	0.162323	0.120555	HPRT1/PAICS	2	1.81818
GO:0006222	BP	GO:0006222	UMP biosynthetic process	2/605	11/18870	0.0465993	0.162323	0.120555	CDA/UMPS	2	1.81818
GO:0030397	BP	GO:0030397	membrane disassembly	2/605	11/18870	0.0465993	0.162323	0.120555	VRK1/PRKCA	2	1.81818
GO:0032060	BP	GO:0032060	bleb assembly	2/605	11/18870	0.0465993	0.162323	0.120555	ANLN/EMP1	2	1.81818
GO:0032493	BP	GO:0032493	response to bacterial lipoprotein	2/605	11/18870	0.0465993	0.162323	0.120555	CD14/TLR2	2	1.81818
GO:0033089	BP	GO:0033089	positive regulation of T cell differentiation in thymus	2/605	11/18870	0.0465993	0.162323	0.120555	RASGRP1/IL7R	2	1.81818
GO:0042118	BP	GO:0042118	endothelial cell activation	2/605	11/18870	0.0465993	0.162323	0.120555	P2RX4/CXCL10	2	1.81818
GO:0042451	BP	GO:0042451	purine nucleoside biosynthetic process	2/605	11/18870	0.0465993	0.162323	0.120555	HPRT1/PNP	2	1.81818
GO:0042455	BP	GO:0042455	ribonucleoside biosynthetic process	2/605	11/18870	0.0465993	0.162323	0.120555	HPRT1/PNP	2	1.81818
GO:0045654	BP	GO:0045654	positive regulation of megakaryocyte differentiation	2/605	11/18870	0.0465993	0.162323	0.120555	HMGB2/GATA2	2	1.81818
GO:0045980	BP	GO:0045980	negative regulation of nucleotide metabolic process	2/605	11/18870	0.0465993	0.162323	0.120555	PARP1/CDA	2	1.81818
GO:0046129	BP	GO:0046129	purine ribonucleoside biosynthetic process	2/605	11/18870	0.0465993	0.162323	0.120555	HPRT1/PNP	2	1.81818
GO:0046940	BP	GO:0046940	nucleoside monophosphate phosphorylation	2/605	11/18870	0.0465993	0.162323	0.120555	CMPK2/DTYMK	2	1.81818
GO:0048563	BP	GO:0048563	post-embryonic animal organ morphogenesis	2/605	11/18870	0.0465993	0.162323	0.120555	BAX/BCL2L11	2	1.81818
GO:0051095	BP	GO:0051095	regulation of helicase activity	2/605	11/18870	0.0465993	0.162323	0.120555	MNAT1/MSH2	2	1.81818
GO:0070673	BP	GO:0070673	response to interleukin-18	2/605	11/18870	0.0465993	0.162323	0.120555	RIPK2/IL18	2	1.81818
GO:0071349	BP	GO:0071349	cellular response to interleukin-12	2/605	11/18870	0.0465993	0.162323	0.120555	STAT4/IL12RB2	2	1.81818
GO:0071895	BP	GO:0071895	odontoblast differentiation	2/605	11/18870	0.0465993	0.162323	0.120555	TUBB/FAM20C	2	1.81818
GO:0090220	BP	GO:0090220	chromosome localization to nuclear envelope involved in homologous chromosome segregation	2/605	11/18870	0.0465993	0.162323	0.120555	MLH1/ATM	2	1.81818
GO:1902510	BP	GO:1902510	regulation of apoptotic DNA fragmentation	2/605	11/18870	0.0465993	0.162323	0.120555	BAX/APAF1	2	1.81818
GO:1904181	BP	GO:1904181	positive regulation of membrane depolarization	2/605	11/18870	0.0465993	0.162323	0.120555	PARP1/MLLT11	2	1.81818
GO:1904424	BP	GO:1904424	regulation of GTP binding	2/605	11/18870	0.0465993	0.162323	0.120555	STMN1/MET	2	1.81818
GO:2000109	BP	GO:2000109	regulation of macrophage apoptotic process	2/605	11/18870	0.0465993	0.162323	0.120555	CDKN2A/IRF7	2	1.81818
GO:0035150	BP	GO:0035150	regulation of tube size	9/605	147/18870	0.047395	0.16497	0.122521	GCH1/ATP2B1/EDN3/EDN2/GCLC/TACR1/HBB/GCLM/CD38	9	0.612245
GO:0032677	BP	GO:0032677	regulation of interleukin-8 production	7/605	103/18870	0.0477408	0.165924	0.123229	CD14/F3/TLR4/TLR2/SYK/CHI3L1/PTPRC	7	0.679612
GO:0097306	BP	GO:0097306	cellular response to alcohol	7/605	103/18870	0.0477408	0.165924	0.123229	RAD51/BLM/BRCA1/CDK4/AHR/DNMT3A/GPLD1	7	0.679612
GO:0060337	BP	GO:0060337	type I interferon-mediated signaling pathway	6/605	82/18870	0.0479108	0.166264	0.123482	CNOT7/STAT1/MMP12/METTL3/IRF7/IFNAR1	6	0.731707
GO:1905897	BP	GO:1905897	regulation of response to endoplasmic reticulum stress	6/605	82/18870	0.0479108	0.166264	0.123482	BAX/BCL2L11/OPA1/CLU/PMAIP1/PIK3R1	6	0.731707
GO:0001952	BP	GO:0001952	regulation of cell-matrix adhesion	8/605	125/18870	0.0481065	0.166499	0.123656	CDKN2A/APOD/SMAD3/MMP12/RIN2/PTK2/PLAU/PIK3R1	8	0.64
GO:0002698	BP	GO:0002698	negative regulation of immune effector process	8/605	125/18870	0.0481065	0.166499	0.123656	CR2/SLAMF8/ASCL2/HLX/AHR/IL7R/PTPRC/BST2	8	0.64
GO:0002714	BP	GO:0002714	positive regulation of B cell mediated immunity	4/605	43/18870	0.0482313	0.166499	0.123656	MLH1/MSH2/PAXIP1/PTPRC	4	0.930233
GO:0002891	BP	GO:0002891	positive regulation of immunoglobulin mediated immune response	4/605	43/18870	0.0482313	0.166499	0.123656	MLH1/MSH2/PAXIP1/PTPRC	4	0.930233
GO:0051955	BP	GO:0051955	regulation of amino acid transport	4/605	43/18870	0.0482313	0.166499	0.123656	GABBR1/ARL6IP1/SLC38A1/SLC7A5	4	0.930233
GO:0060443	BP	GO:0060443	mammary gland morphogenesis	4/605	43/18870	0.0482313	0.166499	0.123656	BAX/ESR1/IGFBP5/MED1	4	0.930233
GO:1904037	BP	GO:1904037	positive regulation of epithelial cell apoptotic process	4/605	43/18870	0.0482313	0.166499	0.123656	STK4/BAX/EIF2S1/PRKCI	4	0.930233
GO:0046824	BP	GO:0046824	positive regulation of nucleocytoplasmic transport	5/605	62/18870	0.0483502	0.16666	0.123776	CDK1/ECT2/SMAD3/RAN/PIK3R1	5	0.806452
GO:0090303	BP	GO:0090303	positive regulation of wound healing	5/605	62/18870	0.0483502	0.16666	0.123776	F3/PTK2/CXCR4/HBEGF/PLAU	5	0.806452
GO:0060070	BP	GO:0060070	canonical Wnt signaling pathway	16/605	316/18870	0.0490623	0.168246	0.124953	ASPM/STK3/G3BP1/STK4/SMAD3/EGR1/IGFBP6/SOX2/CTHRC1/OTULIN/LEF1/GPC3/AXIN2/NR4A2/FRZB/NDP	16	0.506329
GO:0002433	BP	GO:0002433	immune response-regulating cell surface receptor signaling pathway involved in phagocytosis	3/605	26/18870	0.0493574	0.168246	0.124953	PTK2/SYK/PTPRC	3	1.15385
GO:0006929	BP	GO:0006929	substrate-dependent cell migration	3/605	26/18870	0.0493574	0.168246	0.124953	STK4/ROBO1/PTPRC	3	1.15385
GO:0032816	BP	GO:0032816	positive regulation of natural killer cell activation	3/605	26/18870	0.0493574	0.168246	0.124953	RASGRP1/IL18/IL15RA	3	1.15385
GO:0032967	BP	GO:0032967	positive regulation of collagen biosynthetic process	3/605	26/18870	0.0493574	0.168246	0.124953	HDAC2/MYB/ENG	3	1.15385
GO:0033622	BP	GO:0033622	integrin activation	3/605	26/18870	0.0493574	0.168246	0.124953	KIF14/CXCL12/SELP	3	1.15385
GO:0038096	BP	GO:0038096	Fc-gamma receptor signaling pathway involved in phagocytosis	3/605	26/18870	0.0493574	0.168246	0.124953	PTK2/SYK/PTPRC	3	1.15385
GO:0042278	BP	GO:0042278	purine nucleoside metabolic process	3/605	26/18870	0.0493574	0.168246	0.124953	HPRT1/DGUOK/PNP	3	1.15385
GO:0044346	BP	GO:0044346	fibroblast apoptotic process	3/605	26/18870	0.0493574	0.168246	0.124953	BID/BCL2L11/MYC	3	1.15385
GO:0060333	BP	GO:0060333	type II interferon-mediated signaling pathway	3/605	26/18870	0.0493574	0.168246	0.124953	IFNGR1/STAT1/MED1	3	1.15385
GO:0060740	BP	GO:0060740	prostate gland epithelium morphogenesis	3/605	26/18870	0.0493574	0.168246	0.124953	FOXA1/ESR1/ID4	3	1.15385
GO:1901028	BP	GO:1901028	regulation of mitochondrial outer membrane permeabilization involved in apoptotic signaling pathway	3/605	26/18870	0.0493574	0.168246	0.124953	GCLC/ACAA2/GZMB	3	1.15385
GO:1904353	BP	GO:1904353	regulation of telomere capping	3/605	26/18870	0.0493574	0.168246	0.124953	NEK2/AURKB/ATM	3	1.15385
GO:1904996	BP	GO:1904996	positive regulation of leukocyte adhesion to vascular endothelial cell	3/605	26/18870	0.0493574	0.168246	0.124953	CHST4/SELP/CHST2	3	1.15385
GO:1905523	BP	GO:1905523	positive regulation of macrophage migration	3/605	26/18870	0.0493574	0.168246	0.124953	C3AR1/P2RX4/PTK2	3	1.15385
GO:0006401	BP	GO:0006401	RNA catabolic process	18/605	367/18870	0.0497896	0.169512	0.125894	EXOSC8/FEN1/RNASEH2A/E2F1/CNOT7/PCBP4/TNKS1BP1/SUPV3L1/ISG20/METTL3/UPF3B/PRKCA/MLH1/ANG/CNOT10/ATM/AXIN2/CNOT6L	18	0.490463
GO:0001841	BP	GO:0001841	neural tube formation	7/605	104/18870	0.0498391	0.169512	0.125894	STIL/KIF20B/STK3/STK4/APAF1/CTHRC1/OPA1	7	0.673077
GO:0032637	BP	GO:0032637	interleukin-8 production	7/605	104/18870	0.0498391	0.169512	0.125894	CD14/F3/TLR4/TLR2/SYK/CHI3L1/PTPRC	7	0.673077
GO:0006575	BP	GO:0006575	cellular modified amino acid metabolic process	8/605	126/18870	0.049997	0.169798	0.126107	DHFR/MTHFD2/TYMS/GCH1/PLOD2/MTRR/GOT2/MED1	8	0.634921
GO:0043200	BP	GO:0043200	response to amino acid	8/605	126/18870	0.049997	0.169798	0.126107	PCNA/DNMT1/EIF2S1/SLC7A5/GCLC/DNMT3A/GCLM/SLC1A2	8	0.634921
GO:0098687	CC	GO:0098687	chromosomal region	80/604	399/19886	1.33E-42	6.67E-40	5.31E-40	MCM6/MCM4/ZWILCH/ZWINT/ESCO2/CDK1/RAD51AP1/CHEK1/TTK/AURKA/NEK2/RAD51/BLM/CCNB1/SPC25/DSCC1/PCNA/SPAG5/NUF2/FEN1/NDC80/KIF2C/DCLRE1B/EZH2/CDCA5/CENPF/TOP2A/HELLS/CDK2/BUB1B/BUB3/NUP107/SMC4/PARP1/SUV39H1/MCM2/ORC5/SMC1A/CENPE/CENPW/BUB1/PDS5B/RPA1/BIRC5/CENPA/MAD2L1/HJURP/STAG1/CDCA8/CENPM/DSN1/DNMT1/HDAC2/BRCA2/MCM3/MCM5/RBBP7/SPC24/CDC20/NUP37/AURKB/RPA2/SMC6/CKAP5/NUP98/ATR/RAD21/PIF1/MCM7/KIF…	80	2.00501
GO:0000228	CC	GO:0000228	nuclear chromosome	51/604	228/19886	9.68E-30	2.43E-27	1.94E-27	MCM6/MCM4/POLE2/TIPIN/GINS2/CHEK1/PRIM2/GINS1/PRIM1/NEK2/RAD51/BLM/SMC2/ANP32E/PCNA/RPA3/POLA1/TOP2A/BRCA1/SMC4/ORC6/PARP1/SUV39H1/MCM2/CDC45/ORC5/SMC1A/PSMC3IP/RPA1/BIRC5/GINS3/HDAC2/BRCA2/MCM3/TIMELESS/MCM5/RBBP7/RPA2/POLA2/POLD3/RAD21/MCM7/POLE/BRMS1L/POLE4/MLH1/ING3/SAP30/TUBG1/POLD1/SMC3	51	2.23684
GO:0000793	CC	GO:0000793	condensed chromosome	53/604	281/19886	5.08E-27	8.49E-25	6.77E-25	ZWILCH/ZWINT/CHEK1/MKI67/TTK/AURKA/NEK2/RAD51/BLM/CCNB1/SPC25/SMC2/SPAG5/NUF2/NDC80/KIF2C/CENPF/TOP2A/CDK2/BUB1B/BRCA1/BUB3/NUP107/SMC4/SUV39H1/SMC1A/CENPE/HMGB2/PSMC3IP/FANCD2/CENPW/BUB1/BIRC5/CENPA/MAD2L1/HJURP/CENPM/DSN1/BRCA2/SPC24/CDC20/NUP37/AURKB/SMC6/CKAP5/NUP98/RAD21/KIF22/ZW10/MLH1/TUBG1/CBX5/SMC3	53	1.88612
GO:0005819	CC	GO:0005819	spindle	64/604	431/19886	2.61E-26	3.27E-24	2.61E-24	CDC7/NUSAP1/ZWILCH/HMMR/CDK1/RACGAP1/DLGAP5/TTK/AURKA/NEK2/KIF23/SHCBP1/CCNB1/KIF11/BORA/ASPM/CDC6/SPAG5/PRC1/KIF15/KIF2C/CENPF/KIF4A/ECT2/KIF20B/BUB1B/FBXO5/KIF14/SMC1A/KIF20A/CENPE/TACC3/BIRC5/MAD2L1/STAG1/KIFC1/RB1/CDCA8/RAE1/DSN1/MZT1/PSRC1/CDC20/TPX2/GPSM2/AURKB/SMC6/KIF18B/CKAP5/RAD21/FAM83D/KIF22/ZW10/KIF2A/ESPL1/TUBB/CDC25B/TUBG1/ATM/BCL2L10/SAC3D1/KATNA1/SMC3/CXCR2	64	1.48492
GO:0000775	CC	GO:0000775	chromosome, centromeric region	50/604	258/19886	4.14E-26	4.16E-24	3.31E-24	ZWILCH/ZWINT/ESCO2/TTK/AURKA/NEK2/CCNB1/SPC25/DSCC1/SPAG5/NUF2/NDC80/KIF2C/EZH2/CDCA5/CENPF/TOP2A/HELLS/BUB1B/BUB3/NUP107/SMC4/SUV39H1/SMC1A/CENPE/CENPW/BUB1/PDS5B/BIRC5/CENPA/MAD2L1/HJURP/STAG1/CDCA8/CENPM/DSN1/DNMT1/SPC24/CDC20/NUP37/AURKB/SMC6/CKAP5/NUP98/RAD21/KIF22/ZW10/DNMT3A/CBX5/SMC3	50	1.93798
GO:0005657	CC	GO:0005657	replication fork	24/604	67/19886	6.95E-20	5.81E-18	4.63E-18	RFC3/UHRF1/TIPIN/CHEK1/PRIM2/PRIM1/BLM/PCNA/RPA3/POLA1/DONSON/PARP1/RAD51C/RFC4/RPA1/DNMT1/MCM3/TIMELESS/RPA2/POLA2/POLD3/PIF1/POLD1/RFC2	24	3.58209
GO:0000779	CC	GO:0000779	condensed chromosome, centromeric region	34/604	182/19886	1.34E-17	8.11E-16	6.46E-16	ZWILCH/ZWINT/TTK/AURKA/NEK2/CCNB1/SPC25/SPAG5/NUF2/NDC80/KIF2C/CENPF/BUB1B/BUB3/NUP107/SMC1A/CENPE/CENPW/BUB1/BIRC5/CENPA/MAD2L1/HJURP/CENPM/DSN1/SPC24/CDC20/NUP37/AURKB/CKAP5/NUP98/KIF22/ZW10/CBX5	34	1.86813
GO:0000776	CC	GO:0000776	kinetochore	33/604	171/19886	1.45E-17	8.11E-16	6.46E-16	ZWILCH/ZWINT/TTK/AURKA/NEK2/CCNB1/SPC25/SPAG5/NUF2/NDC80/KIF2C/CENPF/BUB1B/BUB3/NUP107/SMC1A/CENPE/CENPW/BUB1/BIRC5/MAD2L1/HJURP/CENPM/DSN1/SPC24/CDC20/NUP37/AURKB/CKAP5/NUP98/KIF22/ZW10/CBX5	33	1.92982
GO:0000781	CC	GO:0000781	chromosome, telomeric region	33/604	171/19886	1.45E-17	8.11E-16	6.46E-16	MCM6/MCM4/CDK1/RAD51AP1/CHEK1/RAD51/BLM/PCNA/FEN1/DCLRE1B/EZH2/CDK2/PARP1/MCM2/ORC5/RPA1/HDAC2/BRCA2/MCM3/MCM5/RBBP7/RPA2/SMC6/ATR/PIF1/MCM7/PRKDC/MSH2/XRCC6/CHEK2/ATM/POLD1/CBX5	33	1.92982
GO:0072686	CC	GO:0072686	mitotic spindle	34/604	184/19886	1.91E-17	9.58E-16	7.63E-16	CDC7/NUSAP1/CDK1/RACGAP1/DLGAP5/AURKA/KIF23/KIF11/ASPM/CDC6/SPAG5/PRC1/ECT2/KIF20B/SMC1A/CENPE/TACC3/MAD2L1/STAG1/KIFC1/RAE1/TPX2/GPSM2/AURKB/SMC6/KIF18B/FAM83D/KIF22/ESPL1/TUBB/TUBG1/KATNA1/SMC3/CXCR2	34	1.84783
GO:0030894	CC	GO:0030894	replisome	12/604	15/19886	2.32E-16	1.06E-14	8.43E-15	PRIM2/PRIM1/PCNA/RPA3/POLA1/DONSON/RPA1/MCM3/RPA2/POLA2/POLD3/POLD1	12	8
GO:0000922	CC	GO:0000922	spindle pole	32/604	176/19886	2.79E-16	1.17E-14	9.28E-15	DLGAP5/AURKA/NEK2/CCNB1/KIF11/ASPM/CDC6/SPAG5/PRC1/CENPF/KIF20B/SMC1A/TACC3/MAD2L1/STAG1/RAE1/DSN1/PSRC1/CDC20/TPX2/GPSM2/AURKB/SMC6/CKAP5/RAD21/FAM83D/ZW10/KIF2A/CDC25B/TUBG1/KATNA1/SMC3	32	1.81818
GO:0071162	CC	GO:0071162	CMG complex	10/604	11/19886	6.65E-15	2.57E-13	2.05E-13	MCM6/MCM4/GINS2/GINS1/MCM2/CDC45/GINS3/MCM3/MCM5/MCM7	10	9.09091
GO:0031261	CC	GO:0031261	DNA replication preinitiation complex	10/604	13/19886	1.64E-13	5.44E-12	4.34E-12	MCM6/MCM4/GINS2/GINS1/MCM2/CDC45/GINS3/MCM3/MCM5/MCM7	10	7.69231
GO:0043601	CC	GO:0043601	nuclear replisome	10/604	13/19886	1.64E-13	5.44E-12	4.34E-12	PRIM2/PRIM1/RPA3/POLA1/RPA1/MCM3/RPA2/POLA2/POLD3/POLD1	10	7.69231
GO:0061695	CC	GO:0061695	transferase complex, transferring phosphorus-containing groups	38/604	306/19886	1.74E-13	5.44E-12	4.34E-12	POLE2/CDK1/PRIM2/CKS2/PRIM1/DBF4/CCNB1/CCNE2/CCNB2/PCNA/CKS1B/CCNA2/POLA1/CDK2/POLR3C/CCNE1/MCM3/CCNF/CCND1/POLA2/PRKCI/POLD3/POLE/POLR1D/PRKDC/POLR2I/MNAT1/POLE4/PRPS1/POLR3K/CDK4/CCNG2/XRCC6/POLR2D/POLD1/CCND2/CCNA1/PIK3R1	38	1.24183
GO:0000307	CC	GO:0000307	cyclin-dependent protein kinase holoenzyme complex	17/604	54/19886	2.12E-13	6.25E-12	4.98E-12	CDK1/CKS2/CCNB1/CCNE2/CCNB2/PCNA/CKS1B/CCNA2/CDK2/CCNE1/CCNF/CCND1/MNAT1/CDK4/CCNG2/CCND2/CCNA1	17	3.14815
GO:0043596	CC	GO:0043596	nuclear replication fork	14/604	34/19886	3.90E-13	1.09E-11	8.66E-12	TIPIN/PRIM2/PRIM1/PCNA/RPA3/POLA1/PARP1/RPA1/MCM3/TIMELESS/RPA2/POLA2/POLD3/POLD1	14	4.11765
GO:0097431	CC	GO:0097431	mitotic spindle pole	13/604	38/19886	4.44E-11	1.12E-09	8.96E-10	AURKA/ASPM/SPAG5/KIF20B/SMC1A/STAG1/RAE1/GPSM2/AURKB/SMC6/FAM83D/KATNA1/SMC3	13	3.42105
GO:0042575	CC	GO:0042575	DNA polymerase complex	10/604	19/19886	4.48E-11	1.12E-09	8.96E-10	POLE2/PRIM2/PRIM1/POLA1/MCM3/POLA2/POLD3/POLE/POLE4/POLD1	10	5.26316
GO:0000940	CC	GO:0000940	outer kinetochore	10/604	20/19886	8.72E-11	2.08E-09	1.66E-09	ZWINT/CCNB1/SPC25/NUF2/NDC80/CENPF/BUB1B/BUB1/DSN1/SPC24	10	5
GO:1902554	CC	GO:1902554	serine/threonine protein kinase complex	21/604	128/19886	2.85E-10	6.49E-09	5.17E-09	CDK1/CKS2/DBF4/CCNB1/CCNE2/CCNB2/PCNA/CKS1B/CCNA2/CDK2/CCNE1/CCNF/CCND1/PRKCI/PRKDC/MNAT1/CDK4/CCNG2/XRCC6/CCND2/CCNA1	21	1.64062
GO:0030496	CC	GO:0030496	midbody	26/604	204/19886	6.90E-10	1.51E-08	1.20E-08	CDK1/RACGAP1/AURKA/NEK2/KIF23/SHCBP1/ANLN/ASPM/SPAG5/PRC1/CENPF/KIF4A/ECT2/KIF20B/KIF14/KIF20A/CENPE/BIRC5/CDCA8/PSRC1/AURKB/RAD21/TXNDC9/SLC2A1/RAN/KATNA1	26	1.27451
GO:1902911	CC	GO:1902911	protein kinase complex	21/604	148/19886	4.36E-09	9.11E-08	7.26E-08	CDK1/CKS2/DBF4/CCNB1/CCNE2/CCNB2/PCNA/CKS1B/CCNA2/CDK2/CCNE1/CCNF/CCND1/PRKCI/PRKDC/MNAT1/CDK4/CCNG2/XRCC6/CCND2/CCNA1	21	1.41892
GO:0034399	CC	GO:0034399	nuclear periphery	21/604	150/19886	5.57E-09	1.12E-07	8.91E-08	UHRF1/BLM/PCNA/POLA1/NUP205/CENPF/KIF4A/NUP107/SUV39H1/SMC1A/CENPW/STAG1/LMNB1/NUP98/RAD21/MYB/NUP153/PHF5A/PAXIP1/DNMT3A/SMC3	21	1.4
GO:1990391	CC	GO:1990391	DNA repair complex	9/604	22/19886	7.24E-09	1.40E-07	1.11E-07	FANCI/BRCA1/FANCD2/BRCA2/XRCC4/PALB2/PRKDC/XRCC6/ATM	9	4.09091
GO:0005871	CC	GO:0005871	kinesin complex	12/604	47/19886	1.09E-08	2.03E-07	1.62E-07	KIF23/KIF11/KIF15/KIF2C/KIF20B/KIF14/KIF20A/KIFC1/KIF18B/KIF5A/KIF22/KIF2A	12	2.55319
GO:0000794	CC	GO:0000794	condensed nuclear chromosome	15/604	81/19886	1.86E-08	3.33E-07	2.65E-07	CHEK1/NEK2/RAD51/BLM/SMC2/BRCA1/SMC4/SUV39H1/SMC1A/PSMC3IP/BRCA2/RAD21/MLH1/TUBG1/SMC3	15	1.85185
GO:0043240	CC	GO:0043240	Fanconi anaemia nuclear complex	7/604	13/19886	3.37E-08	5.84E-07	4.65E-07	FANCC/FANCG/FANCE/FANCA/FANCL/FANCB/FANCM	7	5.38462
GO:0051233	CC	GO:0051233	spindle midzone	10/604	37/19886	1.03E-07	1.72E-06	1.37E-06	RACGAP1/AURKA/CDC6/PRC1/KIF20B/KIF14/CENPE/CDCA8/AURKB/KIF18B	10	2.7027
GO:0009897	CC	GO:0009897	external side of plasma membrane	32/604	387/19886	3.32E-07	5.37E-06	4.28E-06	CD163/CD86/CD14/F3/CXCR3/TLR4/PLAUR/CD3G/FCER1G/CD274/SLC38A1/CXCR4/CLEC14A/SLC7A5/CXCL9/CD3D/CXCL12/SELP/CXCL10/CTLA4/ENG/AZGP1/OSMR/IL12RB2/IL7R/PTPRC/ANPEP/CXCR2/PLAU/CD27/CD83/SELL	32	0.826873
GO:0005874	CC	GO:0005874	microtubule	36/604	467/19886	3.42E-07	5.37E-06	4.28E-06	NUSAP1/ZWILCH/CDK1/RACGAP1/AURKA/NEK2/KIF23/GAS2L3/KIF11/STMN1/ASPM/SPAG5/PRC1/KIF15/KIF2C/KIF4A/KIF20B/KIF14/KIF20A/CENPE/CENPJ/BIRC5/KIFC1/PSRC1/TPX2/AURKB/KIF18B/CKAP5/KIF5A/KIF22/ZW10/KIF2A/TUBB/OPA1/TUBG1/KATNA1	36	0.770878
GO:0005635	CC	GO:0005635	nuclear envelope	37/604	494/19886	4.76E-07	7.25E-06	5.77E-06	DTL/BRIP1/POLA1/NUP205/CENPF/TMPO/CDK2/NUP107/CSE1L/PARP1/RRM1/TRA2B/GCH1/MAD2L1/KPNA2/NUP50/RAE1/FANCL/LMNB1/LBR/BAX/NUP37/SMAD3/CCND1/RANBP1/NUP98/EBP/NUP153/BNIP3/TUBB/CDK4/RAN/RETSAT/BCL2L10/IL15RA/CCND2/CBX5	37	0.748988
GO:0005876	CC	GO:0005876	spindle microtubule	13/604	81/19886	9.29E-07	1.37E-05	1.09E-05	ZWILCH/CDK1/AURKA/KIF11/PRC1/KIF4A/CENPE/PSRC1/AURKB/KIF18B/ZW10/KIF2A/TUBG1	13	1.60494
GO:0016605	CC	GO:0016605	PML body	15/604	109/19886	1.06E-06	1.52E-05	1.21E-05	RAD51/BLM/RPA1/RB1/SP3/RPA2/SMC6/ATR/TOP3A/ISG20/CASP8AP2/HIPK2/CHEK2/CBX5/HIRA	15	1.37615
GO:0005875	CC	GO:0005875	microtubule associated complex	18/604	156/19886	1.29E-06	1.80E-05	1.43E-05	AURKA/KIF23/KIF11/KIF15/KIF2C/KIF4A/KIF20B/KIF14/KIF20A/BIRC5/KIFC1/CDCA8/AURKB/KIF18B/KIF5A/KIF22/KIF2A/KATNA1	18	1.15385
GO:0000792	CC	GO:0000792	heterochromatin	12/604	79/19886	4.42E-06	6.00E-05	4.78E-05	UHRF1/ESCO2/CDKN2A/EZH2/HELLS/WDR76/SUV39H1/CENPA/DNMT1/TNKS1BP1/DNMT3A/CBX5	12	1.51899
GO:0043073	CC	GO:0043073	germ cell nucleus	11/604	68/19886	5.90E-06	7.80E-05	6.21E-05	AURKA/RAD51/PCNA/TOP2A/CDK2/TRIP13/BRCA1/DNMT1/MLH1/SLC2A1/RAN	11	1.61765
GO:0016363	CC	GO:0016363	nuclear matrix	15/604	128/19886	8.09E-06	0.000104114	8.30E-05	UHRF1/BLM/POLA1/CENPF/KIF4A/SMC1A/CENPW/STAG1/LMNB1/RAD21/MYB/PHF5A/PAXIP1/DNMT3A/SMC3	15	1.17188
GO:0045171	CC	GO:0045171	intercellular bridge	12/604	92/19886	2.19E-05	0.00027454	0.000218757	CDC7/CDC6/PRC1/KIF20B/KIF20A/CENPE/CDCA8/TPX2/PRKCI/FAM83D/TUBB/QSOX1	12	1.30435
GO:0000800	CC	GO:0000800	lateral element	5/604	14/19886	4.05E-05	0.000473205	0.000377056	RAD51/BLM/BRCA1/BRCA2/SMC3	5	3.57143
GO:0045120	CC	GO:0045120	pronucleus	5/604	14/19886	4.05E-05	0.000473205	0.000377056	AURKA/CCNA2/EZH2/CENPF/SLC2A1	5	3.57143
GO:1990023	CC	GO:1990023	mitotic spindle midzone	5/604	14/19886	4.05E-05	0.000473205	0.000377056	PRC1/KIF20B/CENPE/AURKB/KIF18B	5	3.57143
GO:0000152	CC	GO:0000152	nuclear ubiquitin ligase complex	8/604	44/19886	4.67E-05	0.00053227	0.000424119	RAD51/BUB1B/BRCA1/UBE2C/BARD1/BRCA2/CDC20/UBE2S	8	1.81818
GO:0090734	CC	GO:0090734	site of DNA damage	13/604	117/19886	5.65E-05	0.00063066	0.000502518	ESCO2/RAD51/RPA3/WDR76/RNF168/PARP1/RPA1/TIMELESS/XRCC4/RPA2/SMC6/CBX5/XPC	13	1.11111
GO:0090575	CC	GO:0090575	RNA polymerase II transcription regulator complex	20/604	254/19886	0.000104374	0.00113903	0.000907597	E2F8/E2F7/RB1/E2F1/E2F2/SMAD3/STAT1/MXD3/HIPK2/TFDP1/MYB/MNAT1/STAT4/LEF1/E2F3/ATF3/NFIL3/ASCL2/MED1/MYC	20	0.787402
GO:0008278	CC	GO:0008278	cohesin complex	4/604	10/19886	0.00015292	0.00159929	0.00127433	SMC1A/STAG1/RAD21/SMC3	4	4
GO:0035098	CC	GO:0035098	ESC/E(Z) complex	4/604	10/19886	0.00015292	0.00159929	0.00127433	EZH2/HDAC2/RBBP7/EED	4	4
GO:0001673	CC	GO:0001673	male germ cell nucleus	8/604	52/19886	0.000160048	0.00163967	0.00130651	RAD51/PCNA/TOP2A/CDK2/TRIP13/BRCA1/MLH1/RAN	8	1.53846
GO:0005721	CC	GO:0005721	pericentric heterochromatin	6/604	30/19886	0.00024405	0.00245026	0.0019524	ESCO2/EZH2/HELLS/CENPA/DNMT1/CBX5	6	2
GO:0055029	CC	GO:0055029	nuclear DNA-directed RNA polymerase complex	11/604	111/19886	0.000562759	0.00553931	0.00441379	PRIM2/PRIM1/POLA1/POLR3C/MCM3/POLA2/POLR1D/POLR2I/MNAT1/POLR3K/POLR2D	11	0.990991
GO:0031965	CC	GO:0031965	nuclear membrane	21/604	311/19886	0.000576889	0.00555568	0.00442684	DTL/BRIP1/NUP205/CENPF/NUP107/TRA2B/GCH1/KPNA2/NUP50/LMNB1/LBR/SMAD3/CCND1/NUP98/EBP/NUP153/CDK4/RETSAT/BCL2L10/IL15RA/CCND2	21	0.675241
GO:0000803	CC	GO:0000803	sex chromosome	6/604	35/19886	0.000586556	0.00555568	0.00442684	ESCO2/PLK4/CDK2/BRCA1/SMC6/DNMT3A	6	1.71429
GO:0010369	CC	GO:0010369	chromocenter	4/604	14/19886	0.000661531	0.0060117	0.0047902	ESCO2/CDCA8/AURKB/CBX5	4	2.85714
GO:0030014	CC	GO:0030014	CCR4-NOT complex	4/604	14/19886	0.000661531	0.0060117	0.0047902	CNOT7/TNKS1BP1/CNOT10/CNOT6L	4	2.85714
GO:0034708	CC	GO:0034708	methyltransferase complex	10/604	96/19886	0.000670627	0.0060117	0.0047902	EZH2/HDAC2/RBBP7/SNRPD1/METTL3/SNRPB/PAXIP1/EED/PRMT1/CBX5	10	1.04167
GO:0000428	CC	GO:0000428	DNA-directed RNA polymerase complex	11/604	114/19886	0.000705271	0.00621133	0.00494927	PRIM2/PRIM1/POLA1/POLR3C/MCM3/POLA2/POLR1D/POLR2I/MNAT1/POLR3K/POLR2D	11	0.964912
GO:0005643	CC	GO:0005643	nuclear pore	10/604	97/19886	0.000727804	0.00629927	0.00501934	NUP205/NUP107/MAD2L1/NUP50/RAE1/NUP37/RANBP1/NUP98/NUP153/RAN	10	1.03093
GO:0001741	CC	GO:0001741	XY body	4/604	15/19886	0.000880531	0.00736711	0.0058702	ESCO2/PLK4/BRCA1/DNMT3A	4	2.66667
GO:0072687	CC	GO:0072687	meiotic spindle	4/604	15/19886	0.000880531	0.00736711	0.0058702	AURKA/BORA/ASPM/FBXO5	4	2.66667
GO:0030880	CC	GO:0030880	RNA polymerase complex	11/604	118/19886	0.000940802	0.00774234	0.0061692	PRIM2/PRIM1/POLA1/POLR3C/MCM3/POLA2/POLR1D/POLR2I/MNAT1/POLR3K/POLR2D	11	0.932203
GO:0035861	CC	GO:0035861	site of double-strand break	9/604	85/19886	0.00109529	0.00886828	0.00706636	ESCO2/RAD51/RPA3/RNF168/PARP1/TIMELESS/XRCC4/RPA2/SMC6	9	1.05882
GO:0000930	CC	GO:0000930	gamma-tubulin complex	4/604	16/19886	0.00114601	0.00913173	0.00727628	BRCA1/CENPJ/MZT1/TUBG1	4	2.5
GO:0000795	CC	GO:0000795	synaptonemal complex	6/604	40/19886	0.00121999	0.0094221	0.00750765	RAD51/BLM/BRCA1/BRCA2/MLH1/SMC3	6	1.5
GO:0099086	CC	GO:0099086	synaptonemal structure	6/604	40/19886	0.00121999	0.0094221	0.00750765	RAD51/BLM/BRCA1/BRCA2/MLH1/SMC3	6	1.5
GO:1904813	CC	GO:1904813	ficolin-1-rich granule lumen	11/604	124/19886	0.00141311	0.0107482	0.00856431	PSMD14/GUSB/PRDX4/CDA/MMP9/APAF1/AGL/CFD/XRCC6/HBB/PNP	11	0.887097
GO:0034774	CC	GO:0034774	secretory granule lumen	20/604	322/19886	0.00210686	0.0157857	0.0125782	DSN1/PSMD14/GUSB/PRDX4/CDA/APAF1/AGL/PYGB/PRSS2/CFD/TUBB/LYZ/CXCL1/XRCC6/CHI3L1/QSOX1/PNP/VWF/PLAC8/CLU	20	0.621118
GO:0060205	CC	GO:0060205	cytoplasmic vesicle lumen	20/604	325/19886	0.00234576	0.0173172	0.0137986	DSN1/PSMD14/GUSB/PRDX4/CDA/APAF1/AGL/PYGB/PRSS2/CFD/TUBB/LYZ/CXCL1/XRCC6/CHI3L1/QSOX1/PNP/VWF/PLAC8/CLU	20	0.615385
GO:0031983	CC	GO:0031983	vesicle lumen	20/604	326/19886	0.0024303	0.0176813	0.0140887	DSN1/PSMD14/GUSB/PRDX4/CDA/APAF1/AGL/PYGB/PRSS2/CFD/TUBB/LYZ/CXCL1/XRCC6/CHI3L1/QSOX1/PNP/VWF/PLAC8/CLU	20	0.613497
GO:0070938	CC	GO:0070938	contractile ring	3/604	10/19886	0.0028521	0.0201656	0.0160682	ANLN/PRC1/KIF20B	3	3
GO:0097136	CC	GO:0097136	Bcl-2 family protein complex	3/604	10/19886	0.0028521	0.0201656	0.0160682	BAX/BCL2L11/PMAIP1	3	3
GO:0005814	CC	GO:0005814	centriole	12/604	157/19886	0.00309834	0.0216023	0.017213	STIL/AURKA/PLK4/TOP2A/CCP110/CENPJ/CCNF/KIF2A/CCDC88A/RAN/TUBG1/WDR90	12	0.764331
GO:0005680	CC	GO:0005680	anaphase-promoting complex	4/604	21/19886	0.00334108	0.0229756	0.0183073	BUB1B/UBE2C/CDC20/UBE2S	4	1.90476
GO:1990752	CC	GO:1990752	microtubule end	5/604	34/19886	0.00341158	0.0231434	0.018441	ASPM/SPAG5/KIF2C/KIF18B/CKAP5	5	1.47059
GO:0016580	CC	GO:0016580	Sin3 complex	4/604	22/19886	0.00398669	0.0263331	0.0209826	HDAC2/RBBP7/BRMS1L/SAP30	4	1.81818
GO:0070822	CC	GO:0070822	Sin3-type complex	4/604	22/19886	0.00398669	0.0263331	0.0209826	HDAC2/RBBP7/BRMS1L/SAP30	4	1.81818
GO:0005652	CC	GO:0005652	nuclear lamina	3/604	12/19886	0.00499713	0.032161	0.0256263	PCNA/SUV39H1/LMNB1	3	2.5
GO:0044615	CC	GO:0044615	nuclear pore nuclear basket	3/604	12/19886	0.00499713	0.032161	0.0256263	MAD2L1/NUP98/NUP153	3	2.5
GO:0035371	CC	GO:0035371	microtubule plus-end	4/604	24/19886	0.00552019	0.035029	0.0279116	SPAG5/KIF2C/KIF18B/CKAP5	4	1.66667
GO:0000313	CC	GO:0000313	organellar ribosome	8/604	89/19886	0.00565209	0.035029	0.0279116	MRPS22/MRPS15/MRPS30/MRPL40/MRPS11/MRPL35/NDUFA7/MRPL11	8	0.898876
GO:0005761	CC	GO:0005761	mitochondrial ribosome	8/604	89/19886	0.00565209	0.035029	0.0279116	MRPS22/MRPS15/MRPS30/MRPL40/MRPS11/MRPL35/NDUFA7/MRPL11	8	0.898876
GO:1904724	CC	GO:1904724	tertiary granule lumen	6/604	55/19886	0.00628495	0.0375085	0.0298872	CDA/MMP9/LYZ/CXCL1/QSOX1/HBB	6	1.09091
GO:0005677	CC	GO:0005677	chromatin silencing complex	3/604	13/19886	0.00635103	0.0375085	0.0298872	EZH2/SUV39H1/RB1	3	2.30769
GO:0034709	CC	GO:0034709	methylosome	3/604	13/19886	0.00635103	0.0375085	0.0298872	SNRPD1/SNRPB/PRMT1	3	2.30769
GO:1905286	CC	GO:1905286	serine-type peptidase complex	3/604	13/19886	0.00635103	0.0375085	0.0298872	F3/PLAUR/PLAU	3	2.30769
GO:0045334	CC	GO:0045334	clathrin-coated endocytic vesicle	8/604	92/19886	0.00688646	0.0401977	0.03203	EREG/TGFA/CD3G/CD3D/CTLA4/HBEGF/IL7R/HLA-DPA1	8	0.869565
GO:0030669	CC	GO:0030669	clathrin-coated endocytic vesicle membrane	7/604	74/19886	0.00714921	0.0412518	0.0328699	EREG/TGFA/CD3G/CD3D/HBEGF/IL7R/HLA-DPA1	7	0.945946
GO:0031616	CC	GO:0031616	spindle pole centrosome	3/604	14/19886	0.00790272	0.0450814	0.0359214	DLGAP5/AURKA/AURKB	3	2.14286
GO:0098798	CC	GO:0098798	mitochondrial protein-containing complex	17/604	300/19886	0.0105856	0.0597073	0.0475756	MRPS22/IMMT/COX7B/TIMM9/BAX/MRPS15/UQCR10/NDUFA6/TIMM17A/SUPV3L1/MRPS30/MRPL40/MRPS11/MRPL35/NDUFA7/SDHB/MRPL11	17	0.566667
GO:0101002	CC	GO:0101002	ficolin-1-rich granule	12/604	185/19886	0.0111263	0.0620603	0.0494504	PSMD14/GUSB/PRDX4/CDA/MMP9/APAF1/AGL/CFD/FCER1G/XRCC6/HBB/PNP	12	0.648649
GO:0150005	CC	GO:0150005	enzyme activator complex	3/604	16/19886	0.0116226	0.0637135	0.0507677	PCNA/PSMC3IP/MNAT1	3	1.875
GO:0070820	CC	GO:0070820	tertiary granule	11/604	164/19886	0.0116766	0.0637135	0.0507677	CDA/MMP9/FCER1G/CLEC5A/LYZ/CXCL1/PTPRB/QSOX1/HBB/CD177/PLAU	11	0.670732
GO:0035097	CC	GO:0035097	histone methyltransferase complex	6/604	63/19886	0.0120307	0.0649402	0.0517451	EZH2/HDAC2/RBBP7/PAXIP1/EED/CBX5	6	0.952381
GO:0000118	CC	GO:0000118	histone deacetylase complex	7/604	82/19886	0.012292	0.0656445	0.0523064	ANP32E/HDAC2/RBBP7/BRMS1L/ING3/SAP30/CBX5	7	0.853659
GO:0001674	CC	GO:0001674	female germ cell nucleus	3/604	17/19886	0.0137997	0.0719964	0.0573677	AURKA/DNMT1/SLC2A1	3	1.76471
GO:0098637	CC	GO:0098637	protein complex involved in cell-matrix adhesion	3/604	17/19886	0.0137997	0.0719964	0.0573677	PLAUR/LAMA1/PLAU	3	1.76471
GO:1905369	CC	GO:1905369	endopeptidase complex	7/604	84/19886	0.0139117	0.0719964	0.0573677	CASP2/PSMD14/PSME4/CRADD/PLAUR/PIDD1/PLAU	7	0.833333
GO:0005666	CC	GO:0005666	RNA polymerase III complex	3/604	18/19886	0.0161924	0.082945	0.0660916	POLR3C/POLR1D/POLR3K	3	1.66667
GO:0005775	CC	GO:0005775	vacuolar lumen	11/604	176/19886	0.0188714	0.0956911	0.0762479	DSN1/GUSB/PPT1/PYGB/PRSS2/TUBB/CSF3/LYZ/GPC3/PLAC8/BGN	11	0.625
GO:0016234	CC	GO:0016234	inclusion body	6/604	71/19886	0.0207353	0.103291	0.0823034	NEFH/NUP98/AGL/NUP153/POLD1/CLU	6	0.84507
GO:0035578	CC	GO:0035578	azurophil granule lumen	7/604	91/19886	0.0207816	0.103291	0.0823034	DSN1/GUSB/PYGB/PRSS2/TUBB/LYZ/PLAC8	7	0.769231
GO:0042581	CC	GO:0042581	specific granule	10/604	160/19886	0.0244766	0.120288	0.0958469	C3AR1/PLAUR/CLEC5A/LYZ/CXCL1/PTPRB/CHI3L1/QSOX1/CD177/PLAU	10	0.625
GO:0005828	CC	GO:0005828	kinetochore microtubule	3/604	21/19886	0.0246806	0.120288	0.0958469	ZWILCH/CENPE/ZW10	3	1.42857
GO:0031519	CC	GO:0031519	PcG protein complex	4/604	38/19886	0.0275031	0.132755	0.105781	EZH2/HDAC2/RBBP7/EED	4	1.05263
GO:0017053	CC	GO:0017053	transcription repressor complex	6/604	77/19886	0.0295398	0.141228	0.112533	DEPDC1/SP3/CCND1/MYC/CBX5/HEY2	6	0.779221
GO:1905368	CC	GO:1905368	peptidase complex	8/604	120/19886	0.0300338	0.142236	0.113335	CASP2/PSMD14/PSME4/F3/CRADD/PLAUR/PIDD1/PLAU	8	0.666667
GO:0016607	CC	GO:0016607	nuclear speck	20/604	417/19886	0.0305617	0.143194	0.114099	E2F7/SMC4/IFI16/MBD4/BARD1/CNOT7/PSME4/SMC6/EPAS1/KIF22/LHPP/METTL3/SOX2/PALB2/SRSF10/PHF5A/TAP2/POLR2D/NR4A2/DDX39A	20	0.479616
GO:0000151	CC	GO:0000151	ubiquitin ligase complex	16/604	314/19886	0.0310919	0.143194	0.114099	DTL/CKS2/RAD51/CKS1B/BUB1B/RNF168/BRCA1/UBE2C/BARD1/BRCA2/CCNF/DYRK2/CDC20/UBE2S/OTULIN/MED1	16	0.509554
GO:0030667	CC	GO:0030667	secretory granule membrane	16/604	314/19886	0.0310919	0.143194	0.114099	LAMP3/C3AR1/CD14/PLAUR/TLR2/FCER1G/CLEC5A/SELP/PTPRB/CD177/PTPRC/ANPEP/BST2/CXCR2/PLAU/SELL	16	0.509554
GO:0001939	CC	GO:0001939	female pronucleus	2/604	10/19886	0.0352608	0.159767	0.127305	CCNA2/SLC2A1	2	2
GO:0000791	CC	GO:0000791	euchromatin	5/604	60/19886	0.035327	0.159767	0.127305	UHRF1/PSIP1/ESR1/DNMT3A/ID2	5	0.833333
GO:0030139	CC	GO:0030139	endocytic vesicle	17/604	348/19886	0.0378086	0.169464	0.135031	DPP4/CD163/EREG/RIN2/TGFA/TLR2/CD3G/CSF3/CD3D/SYK/TAP2/CTLA4/HBB/HBEGF/IL7R/HLA-DPA1/TAP1	17	0.488506
GO:0062023	CC	GO:0062023	collagen-containing extracellular matrix	20/604	429/19886	0.0392582	0.174404	0.138967	F3/C1QB/MMP9/CTHRC1/CLEC14A/TPSB2/ANG/CXCL12/LOX/GPC3/VWF/MXRA5/AZGP1/COL5A3/CLU/ABI3BP/LAMA1/NDP/SPARCL1/BGN	20	0.4662
GO:0000109	CC	GO:0000109	nucleotide-excision repair complex	2/604	11/19886	0.0422446	0.182817	0.145671	POLD1/XPC	2	1.81818
GO:0032300	CC	GO:0032300	mismatch repair complex	2/604	11/19886	0.0422446	0.182817	0.145671	MLH1/MSH2	2	1.81818
GO:1905370	CC	GO:1905370	serine-type endopeptidase complex	2/604	11/19886	0.0422446	0.182817	0.145671	PLAUR/PLAU	2	1.81818
GO:0030666	CC	GO:0030666	endocytic vesicle membrane	11/604	202/19886	0.0449349	0.192798	0.153624	CD163/EREG/TGFA/TLR2/CD3G/CD3D/TAP2/HBEGF/IL7R/HLA-DPA1/TAP1	11	0.544554
GO:0005766	CC	GO:0005766	primary lysosome	9/604	155/19886	0.047273	0.19942	0.158901	DSN1/C3AR1/GUSB/PYGB/PRSS2/TUBB/LYZ/PLAC8/BST2	9	0.580645
GO:0042582	CC	GO:0042582	azurophil granule	9/604	155/19886	0.047273	0.19942	0.158901	DSN1/C3AR1/GUSB/PYGB/PRSS2/TUBB/LYZ/PLAC8/BST2	9	0.580645
GO:0031074	CC	GO:0031074	nucleocytoplasmic transport complex	2/604	12/19886	0.0496941	0.204479	0.162931	KPNA2/RAN	2	1.66667
GO:0042105	CC	GO:0042105	alpha-beta T cell receptor complex	2/604	12/19886	0.0496941	0.204479	0.162931	CD3G/CD3D	2	1.66667
GO:0042405	CC	GO:0042405	nuclear inclusion body	2/604	12/19886	0.0496941	0.204479	0.162931	NUP98/NUP153	2	1.66667
GO:0140097	MF	GO:0140097	catalytic activity, acting on DNA	44/602	248/18496	2.36E-20	1.82E-17	1.54E-17	MCM6/MCM4/RFC3/POLE2/BRIP1/RAD51/BLM/EXO1/DSCC1/PCNA/FEN1/DCLRE1B/POLA1/TOP2A/HELLS/MCM2/RAD51C/RFC4/RAD54L/POLQ/MBD4/G3BP1/DNMT1/MCM3/MCM5/LIG1/POLD3/PIF1/MCM7/POLE/SUPV3L1/TOP3A/ISG20/FANCM/TDP1/ALKBH2/POLE4/MLH1/MSH2/XRCC6/DNMT3A/POLD1/SMC3/RFC2	44	1.77419
GO:0003697	MF	GO:0003697	single-stranded DNA binding	28/602	118/18496	8.04E-17	3.10E-14	2.63E-14	MCM6/MCM4/RAD51AP1/RAD51/BLM/SMC2/RPA3/POLA1/SMC4/MCM2/CDC45/RAD54L/HMGB2/RPA1/POLR3C/BRCA2/MCM3/MCM5/RPA2/SMC6/MCM7/TOP3A/TDP1/MLH1/MSH2/NUCKS1/RAD52/XPC	28	2.37288
GO:0003678	MF	GO:0003678	DNA helicase activity	19/602	58/18496	1.20E-14	3.08E-12	2.62E-12	MCM6/MCM4/RFC3/BRIP1/RAD51/BLM/DSCC1/MCM2/RFC4/POLQ/G3BP1/MCM3/MCM5/PIF1/MCM7/SUPV3L1/FANCM/XRCC6/RFC2	19	3.27586
GO:0017116	MF	GO:0017116	single-stranded DNA helicase activity	13/602	23/18496	3.44E-14	6.63E-12	5.62E-12	MCM6/MCM4/RFC3/RAD51/DSCC1/MCM2/RFC4/POLQ/MCM3/MCM5/PIF1/MCM7/RFC2	13	5.65217
GO:0016887	MF	GO:0016887	ATP hydrolysis activity	47/602	412/18496	6.97E-14	1.08E-11	9.12E-12	MCM6/MCM4/RFC3/BRIP1/KIF23/RAD51/BLM/SMC2/ATAD2/CDC6/KIF15/KIF2C/KIF20B/TRIP13/SMC4/KIF14/MCM2/SMC1A/RFC4/KIF20A/RAD54L/KIFC1/ATP2C1/G3BP1/MCM3/MCM5/KIF18B/ATP11C/ATP2B1/PIF1/KIF5A/MCM7/SUPV3L1/KIF22/FANCM/KIF2A/MLH1/MSH2/RNF213/XRCC6/TAP2/KATNA1/DDX39A/SMC3/RFC2/TAP1/ABCB7	47	1.14078
GO:0008094	MF	GO:0008094	ATP-dependent activity, acting on DNA	25/602	122/18496	1.37E-13	1.76E-11	1.49E-11	MCM6/MCM4/RFC3/BRIP1/RAD51/BLM/DSCC1/TOP2A/HELLS/MCM2/RAD51C/RFC4/RAD54L/POLQ/G3BP1/MCM3/MCM5/PIF1/MCM7/SUPV3L1/FANCM/MLH1/MSH2/XRCC6/RFC2	25	2.04918
GO:0016538	MF	GO:0016538	cyclin-dependent protein serine/threonine kinase regulator activity	16/602	50/18496	2.30E-12	2.53E-10	2.15E-10	CKS2/CDKN2A/CCNB1/CCNE2/CCNB2/CKS1B/CCNA2/CDKN2C/CCNE1/CCNF/CCND1/MNAT1/CDK4/CCNG2/CCND2/CCNA1	16	3.2
GO:0003684	MF	GO:0003684	damaged DNA binding	17/602	71/18496	8.34E-11	7.53E-09	6.38E-09	BLM/PCNA/FEN1/RPA3/DCLRE1B/BRCA1/PARP1/HMGB2/POLQ/RPA1/FANCG/RPA2/SMC6/MSH2/XRCC6/POLD1/XPC	17	2.39437
GO:0008017	MF	GO:0008017	microtubule binding	33/602	273/18496	8.78E-11	7.53E-09	6.38E-09	NUSAP1/RACGAP1/DLGAP5/KIF23/GAS2L3/KIF11/SPAG5/PRC1/KIF15/KIF2C/CENPF/KIF4A/KIF20B/KIF14/KIF20A/CENPE/BIRC5/KIFC1/RAE1/NEFH/SPC24/PSRC1/BCL2L11/KIF18B/CKAP5/KIF5A/FAM83D/KIF22/KIF2A/CCDC88A/OPA1/CRYAB/KATNA1	33	1.20879
GO:0015631	MF	GO:0015631	tubulin binding	38/602	379/18496	8.18E-10	6.31E-08	5.35E-08	NUSAP1/RACGAP1/DLGAP5/KIF23/GAS2L3/KIF11/STMN1/SPAG5/PRC1/KIF15/KIF2C/CENPF/KIF4A/KIF20B/BRCA1/KIF14/KIF20A/CENPE/CENPJ/BIRC5/KIFC1/RAE1/BRCA2/NEFH/SPC24/PSRC1/BCL2L11/KIF18B/CKAP5/KIF5A/FAM83D/KIF22/KIF2A/CCDC88A/OPA1/CRYAB/KATNA1/SMC3	38	1.00264
GO:0003777	MF	GO:0003777	microtubule motor activity	15/602	68/18496	3.69E-09	2.59E-07	2.19E-07	KIF23/KIF11/KIF15/KIF2C/KIF4A/KIF20B/KIF14/KIF20A/CENPE/KIFC1/KIF18B/KIF5A/KIF22/KIF2A/SMC3	15	2.20588
GO:0004386	MF	GO:0004386	helicase activity	22/602	154/18496	5.71E-09	3.67E-07	3.11E-07	MCM6/MCM4/RFC3/BRIP1/RAD51/BLM/DSCC1/HELLS/MCM2/RFC4/RAD54L/POLQ/G3BP1/MCM3/MCM5/PIF1/MCM7/SUPV3L1/FANCM/XRCC6/DDX39A/RFC2	22	1.42857
GO:0005126	MF	GO:0005126	cytokine receptor binding	28/602	273/18496	8.77E-08	5.21E-06	4.42E-06	BID/CASP8/SMAD3/STAT1/TNFSF10/TSLP/CASP8AP2/IL1A/CCDC88A/CXCL8/PIDD1/CSF3/CXCL9/SIVA1/CCL4/SYK/CXCL12/CXCL1/CXCL10/IL18/CXCL14/ENG/CCL22/CCL18/TNFSF11/CXCL11/OSMR/PIK3R1	28	1.02564
GO:0019887	MF	GO:0019887	protein kinase regulator activity	25/602	226/18496	1.01E-07	5.52E-06	4.68E-06	CKS2/DBF4/CDKN2A/CCNB1/CCNE2/CCNB2/CKS1B/CCNA2/CDKN2C/STK3/CCNE1/STK4/CCNF/EREG/CCND1/NRG1/TGFA/MNAT1/CDK4/CCNG2/CXCL10/HBEGF/CCND2/CAMK2N1/CCNA1	25	1.10619
GO:0035173	MF	GO:0035173	histone kinase activity	8/602	20/18496	1.07E-07	5.52E-06	4.68E-06	CDK1/CHEK1/AURKA/VRK1/CDK2/BUB1/RPS6KA5/PRKCA	8	4
GO:0140297	MF	GO:0140297	DNA-binding transcription factor binding	39/602	477/18496	1.38E-07	6.65E-06	5.64E-06	CDKN2A/PCNA/CENPF/PARP1/HMGB2/RB1/E2F1/SP3/CNOT7/HDAC2/STK4/ZBTB8A/SMAD3/STAT1/ETS2/RAD21/EPAS1/ESR1/HIPK2/PRKDC/TFDP1/LYAR/TP73/LEF1/ASCL2/AHR/DNMT3A/MED1/NUCKS1/MYC/NR4A2/CBX5/HIRA/HEY2/ID4/ID3/XPC/ID2/GATA2	39	0.81761
GO:0019207	MF	GO:0019207	kinase regulator activity	26/602	256/18496	3.07E-07	1.39E-05	1.18E-05	CKS2/DBF4/CDKN2A/CCNB1/CCNE2/CCNB2/CKS1B/CCNA2/CDKN2C/STK3/CCNE1/STK4/CCNF/EREG/CCND1/NRG1/TGFA/MNAT1/CDK4/CCNG2/CXCL10/HBEGF/CCND2/CAMK2N1/CCNA1/PIK3R1	26	1.01562
GO:0000217	MF	GO:0000217	DNA secondary structure binding	10/602	39/18496	3.36E-07	1.44E-05	1.22E-05	RAD51AP1/BLM/CLSPN/RAD51C/HMGB2/SMC6/HMGB3/FANCM/MSH2/XPC	10	2.5641
GO:0003774	MF	GO:0003774	cytoskeletal motor activity	16/602	112/18496	6.84E-07	2.78E-05	2.36E-05	KIF23/KIF11/KIF15/KIF2C/KIF4A/KIF20B/KIF14/KIF20A/CENPE/KIFC1/KIF18B/KIF5A/KIF22/KIF2A/MYH11/SMC3	16	1.42857
GO:0000287	MF	GO:0000287	magnesium ion binding	23/602	224/18496	1.22E-06	4.70E-05	3.99E-05	PRIM1/FEN1/TOP2A/CDK2/MTHFD2/DCTPP1/STK3/HPRT1/DUT/STK4/DYRK2/WEE1/ENO3/ATP11C/PIF1/RPS6KA5/MSH2/PRPS1/OPA1/GCLC/ENO2/ABL2/RAN	23	1.02679
GO:0008009	MF	GO:0008009	chemokine activity	10/602	49/18496	3.24E-06	0.000118963	0.000100893	CXCL8/CXCL9/CCL4/CXCL12/CXCL1/CXCL10/CXCL14/CCL22/CCL18/CXCL11	10	2.04082
GO:0003688	MF	GO:0003688	DNA replication origin binding	6/602	16/18496	7.03E-06	0.000235858	0.000200033	CDC6/POLA1/MCM2/CDC45/ORC5/MCM5	6	3.75
GO:0061575	MF	GO:0061575	cyclin-dependent protein serine/threonine kinase activator activity	6/602	16/18496	7.03E-06	0.000235858	0.000200033	CKS2/CCNB1/CKS1B/CCND1/MNAT1/CCND2	6	3.75
GO:0106310	MF	GO:0106310	protein serine kinase activity	29/602	361/18496	7.90E-06	0.000246406	0.000208978	CDC7/CDK1/CHEK1/TTK/AURKA/NEK2/VRK1/MELK/PLK4/CDK2/BUB1B/BUB1/STK3/EIF2AK2/STK4/DYRK2/AURKB/PRKCI/PBK/RIPK2/ATR/RPS6KA5/HIPK2/PRKDC/PRKCA/CDK4/CHEK2/ATM/FAM20C	29	0.803324
GO:0003887	MF	GO:0003887	DNA-directed DNA polymerase activity	7/602	24/18496	7.98E-06	0.000246406	0.000208978	POLE2/POLA1/POLQ/POLD3/POLE/POLE4/POLD1	7	2.91667
GO:0042393	MF	GO:0042393	histone binding	23/602	252/18496	8.94E-06	0.000265331	0.000225028	UHRF1/CKS2/DEK/VRK1/ANP32E/CKS1B/ATAD2/RNF168/MCM2/HJURP/CHAF1B/HDAC2/ASF1B/RBBP7/PSME4/STAT1/MTF2/SET/NASP/ING3/LEF1/CBX5/HIRA	23	0.912698
GO:0140996	MF	GO:0140996	histone H3 kinase activity	5/602	11/18496	1.41E-05	0.000403235	0.000341985	CHEK1/AURKA/VRK1/RPS6KA5/PRKCA	5	4.54545
GO:0000400	MF	GO:0000400	four-way junction DNA binding	6/602	18/18496	1.54E-05	0.000410146	0.000347847	BLM/RAD51C/HMGB2/HMGB3/FANCM/MSH2	6	3.33333
GO:0045236	MF	GO:0045236	CXCR chemokine receptor binding	6/602	18/18496	1.54E-05	0.000410146	0.000347847	CXCL8/CXCL9/CXCL12/CXCL1/CXCL10/CXCL11	6	3.33333
GO:0061629	MF	GO:0061629	RNA polymerase II-specific DNA-binding transcription factor binding	27/602	344/18496	2.44E-05	0.000627829	0.000532465	CDKN2A/PCNA/PARP1/RB1/SP3/HDAC2/STK4/ZBTB8A/SMAD3/STAT1/ETS2/EPAS1/ESR1/HIPK2/PRKDC/TP73/LEF1/AHR/DNMT3A/MED1/NR4A2/HIRA/HEY2/ID4/XPC/ID2/GATA2	27	0.784884
GO:0042379	MF	GO:0042379	chemokine receptor binding	11/602	74/18496	2.58E-05	0.000641608	0.000544151	STAT1/CXCL8/CXCL9/CCL4/CXCL12/CXCL1/CXCL10/CXCL14/CCL22/CCL18/CXCL11	11	1.48649
GO:0004674	MF	GO:0004674	protein serine/threonine kinase activity	31/602	427/18496	2.87E-05	0.000692646	0.000587437	CDC7/CDK1/CHEK1/TTK/AURKA/NEK2/VRK1/MELK/PLK4/CDK2/BUB1B/BUB1/STK3/EIF2AK2/STK4/DYRK2/AURKB/PRKCI/PBK/RIPK2/ATR/RPS6KA5/HIPK2/PRKDC/PRKCA/SYK/CDK4/CHEK2/ATM/ENG/FAM20C	31	0.725995
GO:0043138	MF	GO:0043138	3'-5' DNA helicase activity	5/602	14/18496	5.63E-05	0.00131791	0.00111773	MCM6/BLM/MCM2/MCM5/FANCM	5	3.57143
GO:0001221	MF	GO:0001221	transcription coregulator binding	13/602	112/18496	7.17E-05	0.00162906	0.00138162	EZH2/ZBTB8A/SMAD3/STAT1/MTF2/EPAS1/ESR1/EED/LEF1/AHR/MED1/MYC/GATA2	13	1.16071
GO:0001223	MF	GO:0001223	transcription coactivator binding	8/602	44/18496	7.56E-05	0.00166857	0.00141512	ZBTB8A/SMAD3/STAT1/EPAS1/ESR1/AHR/MED1/GATA2	8	1.81818
GO:0004715	MF	GO:0004715	non-membrane spanning protein tyrosine kinase activity	8/602	45/18496	8.94E-05	0.00191734	0.0016261	MELK/EIF2AK2/WEE1/RIPK2/PTK2/ITK/SYK/ABL2	8	1.77778
GO:0016895	MF	GO:0016895	DNA exonuclease activity, producing 5'-phosphomonoesters	6/602	24/18496	9.46E-05	0.00192095	0.00162916	EXO1/FEN1/DCLRE1B/POLE/ISG20/POLD1	6	2.5
GO:0140612	MF	GO:0140612	DNA damage sensor activity	6/602	24/18496	9.46E-05	0.00192095	0.00162916	UHRF1/RAD51/RAD51C/MLH1/MSH2/XPC	6	2.5
GO:0005125	MF	GO:0005125	cytokine activity	20/602	237/18496	0.000101805	0.00201522	0.00170912	TNFSF10/NRG1/TSLP/IL1A/SPP1/CXCL8/CSF3/CXCL9/CCL4/CXCL12/CXCL1/CXCL10/IL18/CXCL14/CCL22/CCL18/TNFSF11/CXCL11/NDP/FLT3LG	20	0.843882
GO:0019209	MF	GO:0019209	kinase activator activity	14/602	133/18496	0.000112007	0.00216173	0.00183337	CKS2/DBF4/CCNB1/CKS1B/STK3/STK4/EREG/CCND1/NRG1/TGFA/MNAT1/HBEGF/CCND2/PIK3R1	14	1.05263
GO:0008574	MF	GO:0008574	plus-end-directed microtubule motor activity	5/602	16/18496	0.000116436	0.0021924	0.00185939	KIF11/KIF20B/KIF14/KIF18B/KIF5A	5	3.125
GO:0004529	MF	GO:0004529	DNA exonuclease activity	6/602	25/18496	0.000121012	0.00222431	0.00188645	EXO1/FEN1/DCLRE1B/POLE/ISG20/POLD1	6	2.4
GO:0043539	MF	GO:0043539	protein serine/threonine kinase activator activity	9/602	60/18496	0.000129686	0.00232831	0.00197465	CKS2/DBF4/CCNB1/CKS1B/STK3/STK4/CCND1/MNAT1/CCND2	9	1.5
GO:0034061	MF	GO:0034061	DNA polymerase activity	7/602	36/18496	0.000137079	0.00240511	0.00203978	POLE2/POLA1/POLQ/POLD3/POLE/POLE4/POLD1	7	1.94444
GO:0004713	MF	GO:0004713	protein tyrosine kinase activity	14/602	138/18496	0.000166222	0.00280032	0.00237497	TTK/MELK/EIF2AK2/DYRK2/WEE1/PBK/RIPK2/RPS6KA5/HIPK2/PTK2/ITK/SYK/ABL2/MET	14	1.01449
GO:0032813	MF	GO:0032813	tumor necrosis factor receptor superfamily binding	8/602	49/18496	0.000166859	0.00280032	0.00237497	BID/CASP8/STAT1/TNFSF10/CASP8AP2/PIDD1/SIVA1/TNFSF11	8	1.63265
GO:0030295	MF	GO:0030295	protein kinase activator activity	13/602	124/18496	0.000203136	0.00333661	0.0028298	CKS2/DBF4/CCNB1/CKS1B/STK3/STK4/EREG/CCND1/NRG1/TGFA/MNAT1/HBEGF/CCND2	13	1.04839
GO:1990841	MF	GO:1990841	promoter-specific chromatin binding	9/602	66/18496	0.000273128	0.00439282	0.00372557	RBL1/EZH2/DNMT1/HDAC2/SMAD3/STAT1/EGR1/NUP98/MED1	9	1.36364
GO:0032404	MF	GO:0032404	mismatch repair complex binding	4/602	11/18496	0.00030547	0.00481271	0.00408168	PCNA/ATR/MLH1/MSH2	4	3.63636
GO:0140375	MF	GO:0140375	immune receptor activity	14/602	147/18496	0.000321833	0.0049691	0.00421432	CR2/C3AR1/IFNGR1/F3/CXCR3/FCER1G/CXCR4/IFNAR1/IL15RA/OSMR/IL12RB2/IL7R/HLA-DPA1/CXCR2	14	0.952381
GO:0140993	MF	GO:0140993	histone modifying activity	17/602	202/18496	0.000340808	0.00515889	0.00437528	UHRF1/CDK1/CHEK1/AURKA/VRK1/EZH2/CDK2/RNF168/SUV39H1/BUB1/HDAC2/BRCA2/RPS6KA5/PRKCA/ING3/EED/PRMT1	17	0.841584
GO:0004518	MF	GO:0004518	nuclease activity	17/602	208/18496	0.000478246	0.00710011	0.00602164	EXO1/FEN1/DCLRE1B/RNASEH2A/RAD51C/MBD4/G3BP1/CNOT7/POP7/POLE/ISG20/FANCM/TDP1/ANG/POLD1/AZGP1/CNOT6L	17	0.817308
GO:0016796	MF	GO:0016796	exonuclease activity, active with either ribo- or deoxyribonucleic acids and producing 5'-phosphomonoesters	8/602	60/18496	0.00069203	0.0100801	0.00854902	EXO1/FEN1/DCLRE1B/CNOT7/POLE/ISG20/POLD1/CNOT6L	8	1.33333
GO:0001222	MF	GO:0001222	transcription corepressor binding	7/602	47/18496	0.000758022	0.0108369	0.00919084	EZH2/SMAD3/STAT1/MTF2/ESR1/EED/LEF1	7	1.48936
GO:0004536	MF	GO:0004536	DNA nuclease activity	8/602	61/18496	0.000774178	0.0108666	0.00921605	EXO1/FEN1/DCLRE1B/RAD51C/MBD4/POLE/ISG20/POLD1	8	1.31148
GO:0030983	MF	GO:0030983	mismatched DNA binding	4/602	14/18496	0.000857115	0.0118159	0.0100212	PCNA/MLH1/MSH2/XPC	4	2.85714
GO:0140416	MF	GO:0140416	transcription regulator inhibitor activity	5/602	24/18496	0.00091318	0.012368	0.0104893	LYAR/LEF1/ID4/ID3/ID2	5	2.08333
GO:0016779	MF	GO:0016779	nucleotidyltransferase activity	13/602	147/18496	0.00104602	0.0139229	0.011808	POLE2/PRIM1/POLA1/PARP1/POLQ/POLR3C/POLD3/POLE/POLR1D/POLR2I/POLE4/POLR3K/POLD1	13	0.884354
GO:0004896	MF	GO:0004896	cytokine receptor activity	10/602	96/18496	0.00113135	0.0148034	0.0125548	IFNGR1/F3/CXCR3/CXCR4/IFNAR1/IL15RA/OSMR/IL12RB2/IL7R/CXCR2	10	1.04167
GO:0004527	MF	GO:0004527	exonuclease activity	9/602	81/18496	0.00125126	0.0160995	0.0136541	EXO1/FEN1/DCLRE1B/CNOT7/POLE/ISG20/TDP1/POLD1/CNOT6L	9	1.11111
GO:0070402	MF	GO:0070402	NADPH binding	4/602	16/18496	0.0014797	0.0187267	0.0158822	DHFR/LBR/MTRR/TP53I3	4	2.5
GO:0005518	MF	GO:0005518	collagen binding	8/602	68/18496	0.00159341	0.0198406	0.0168269	SMAD3/MMP12/MMP9/LOX/PCOLCE2/VWF/COL5A3/SPARCL1	8	1.17647
GO:0051536	MF	GO:0051536	iron-sulfur cluster binding	8/602	70/18496	0.00192297	0.0231958	0.0196725	BRIP1/PRIM2/KIF4A/POLE/ISCA1/DPYD/SDHB/POLD1	8	1.14286
GO:0051540	MF	GO:0051540	metal cluster binding	8/602	70/18496	0.00192297	0.0231958	0.0196725	BRIP1/PRIM2/KIF4A/POLE/ISCA1/DPYD/SDHB/POLD1	8	1.14286
GO:0140299	MF	GO:0140299	small molecule sensor activity	6/602	41/18496	0.00197637	0.0234732	0.0199078	UHRF1/RAD51/RAD51C/MLH1/MSH2/XPC	6	1.46341
GO:0051861	MF	GO:0051861	glycolipid binding	5/602	29/18496	0.00223127	0.0260991	0.0221347	PPT1/CLN6/SELP/LAMA1/SELL	5	1.72414
GO:0008301	MF	GO:0008301	DNA binding, bending	4/602	18/18496	0.00236252	0.0268215	0.0227474	TOP2A/HMGB2/HMGB3/LEF1	4	2.22222
GO:0030297	MF	GO:0030297	transmembrane receptor protein tyrosine kinase activator activity	4/602	18/18496	0.00236252	0.0268215	0.0227474	EREG/NRG1/TGFA/HBEGF	4	2.22222
GO:0051539	MF	GO:0051539	4 iron, 4 sulfur cluster binding	6/602	43/18496	0.00253674	0.0283821	0.024071	BRIP1/PRIM2/POLE/DPYD/SDHB/POLD1	6	1.39535
GO:0003899	MF	GO:0003899	DNA-directed 5'-3' RNA polymerase activity	5/602	30/18496	0.00260686	0.0287499	0.024383	PRIM1/POLR3C/POLR1D/POLR2I/POLR3K	5	1.66667
GO:0005164	MF	GO:0005164	tumor necrosis factor receptor binding	5/602	31/18496	0.00302623	0.0329049	0.0279068	CASP8/STAT1/TNFSF10/SIVA1/TNFSF11	5	1.6129
GO:0043208	MF	GO:0043208	glycosphingolipid binding	3/602	10/18496	0.00346934	0.0371991	0.0315487	SELP/LAMA1/SELL	3	3
GO:0140664	MF	GO:0140664	ATP-dependent DNA damage sensor activity	4/602	20/18496	0.00355263	0.0375703	0.0318636	RAD51/RAD51C/MLH1/MSH2	4	2
GO:0140104	MF	GO:0140104	molecular carrier activity	9/602	95/18496	0.00377801	0.0394139	0.0334271	ANP32E/CSE1L/KPNA2/ASF1B/TIMM9/COX17/RAN/HBB/CLU	9	0.947368
GO:0034062	MF	GO:0034062	5'-3' RNA polymerase activity	5/602	33/18496	0.00400743	0.040707	0.0345238	PRIM1/POLR3C/POLR1D/POLR2I/POLR3K	5	1.51515
GO:0097747	MF	GO:0097747	RNA polymerase activity	5/602	33/18496	0.00400743	0.040707	0.0345238	PRIM1/POLR3C/POLR1D/POLR2I/POLR3K	5	1.51515
GO:0001618	MF	GO:0001618	virus receptor activity	8/602	79/18496	0.00412196	0.0413266	0.0350493	CDK1/CR2/DPP4/CD86/CXCR4/CLEC5A/SIVA1/ANPEP	8	1.01266
GO:0005123	MF	GO:0005123	death receptor binding	4/602	21/18496	0.00427703	0.0423316	0.0359017	BID/CASP8/CASP8AP2/PIDD1	4	1.90476
GO:0140272	MF	GO:0140272	exogenous protein binding	8/602	80/18496	0.00445278	0.0435132	0.0369038	CDK1/CR2/DPP4/CD86/CXCR4/CLEC5A/SIVA1/ANPEP	8	1
GO:0046982	MF	GO:0046982	protein heterodimerization activity	21/602	344/18496	0.00451291	0.0435495	0.0369346	AURKA/TOP2A/SMC1A/CENPW/CENPA/BARD1/BAX/GABBR1/EPAS1/METTL3/TLR4/POLE4/ATF3/RAN/BCL2L10/AHR/KATNA1/NR4A2/SMC3/TPM4/PIK3R1	21	0.610465
GO:0030332	MF	GO:0030332	cyclin binding	5/602	34/18496	0.00457481	0.0436019	0.036979	CDK1/NDC80/CDK2/CDK4/XRCC6	5	1.47059
GO:0004523	MF	GO:0004523	RNA-DNA hybrid ribonuclease activity	3/602	11/18496	0.00465579	0.0438326	0.0371746	EXO1/FEN1/RNASEH2A	3	2.72727
GO:0070182	MF	GO:0070182	DNA polymerase binding	4/602	22/18496	0.0050948	0.0473878	0.0401898	FANCI/RAD51/PCNA/FANCD2	4	1.81818
GO:0005539	MF	GO:0005539	glycosaminoglycan binding	16/602	240/18496	0.00548018	0.0503654	0.0427152	HMMR/SLIT3/TLR2/CXCL8/ANG/SELP/CXCL10/PCOLCE2/ENG/HBEGF/COL5A3/CXCL11/NELL2/PTPRC/SELL/BGN	16	0.666667
GO:0035259	MF	GO:0035259	nuclear glucocorticoid receptor binding	3/602	12/18496	0.00605891	0.0550292	0.0466705	SMAD3/ETS2/NR4A2	3	2.5
GO:0035035	MF	GO:0035035	histone acetyltransferase binding	4/602	24/18496	0.00703063	0.0631121	0.0535257	PCNA/STAT1/EGR1/MED1	4	1.66667
GO:0016799	MF	GO:0016799	hydrolase activity, hydrolyzing N-glycosyl compounds	5/602	38/18496	0.00741984	0.0650922	0.055205	PCNA/MBD4/TLR4/TLR2/CD38	5	1.31579
GO:0042162	MF	GO:0042162	telomeric DNA binding	5/602	38/18496	0.00741984	0.0650922	0.055205	BLM/RPA1/RPA2/PIF1/XRCC6	5	1.31579
GO:0017056	MF	GO:0017056	structural constituent of nuclear pore	4/602	25/18496	0.00815813	0.0699786	0.0593492	NUP205/NUP107/NUP98/NUP153	4	1.6
GO:0070840	MF	GO:0070840	dynein complex binding	4/602	25/18496	0.00815813	0.0699786	0.0593492	CENPF/NEFH/GPSM2/SMC3	4	1.6
GO:0030331	MF	GO:0030331	nuclear estrogen receptor binding	5/602	39/18496	0.0082882	0.0703131	0.0596329	PCNA/PARP1/ESR1/LEF1/MED1	5	1.28205
GO:0044389	MF	GO:0044389	ubiquitin-like protein ligase binding	19/602	327/18496	0.0110358	0.0926045	0.0785383	AURKA/CCNB1/BRCA1/PARP1/UBE2C/UBE2T/RB1/FANCL/BID/CASP8/SMAD3/RPA2/SMC6/STAT1/CXCR4/TUBB/CHEK2/AXIN2/CLU	19	0.58104
GO:0008296	MF	GO:0008296	3'-5'-DNA exonuclease activity	3/602	15/18496	0.0116541	0.0960451	0.0814563	POLE/ISG20/POLD1	3	2
GO:0008201	MF	GO:0008201	heparin binding	12/602	174/18496	0.0116946	0.0960451	0.0814563	SLIT3/CXCL8/ANG/SELP/CXCL10/PCOLCE2/HBEGF/COL5A3/CXCL11/NELL2/PTPRC/SELL	12	0.689655
GO:0035250	MF	GO:0035250	UDP-galactosyltransferase activity	4/602	28/18496	0.0122302	0.0993868	0.0842904	UGT8/B3GALT6/B3GNT3/COLGALT1	4	1.42857
GO:0019205	MF	GO:0019205	nucleobase-containing compound kinase activity	5/602	43/18496	0.0124651	0.10024	0.085014	TK1/DCK/DGUOK/CMPK2/DTYMK	5	1.16279
GO:0004725	MF	GO:0004725	protein tyrosine phosphatase activity	8/602	96/18496	0.0130058	0.10351	0.0877871	CDC25A/CDKN3/CDC25C/PTK2/CDC25B/PTPRB/PTP4A3/PTPRC	8	0.833333
GO:0019894	MF	GO:0019894	kinesin binding	5/602	44/18496	0.0136968	0.105977	0.0898792	PRC1/NEFH/KIF18B/KIF5A/FAM83D	5	1.13636
GO:0003953	MF	GO:0003953	NAD+ nucleosidase activity	3/602	16/18496	0.0140021	0.105977	0.0898792	TLR4/TLR2/CD38	3	1.875
GO:0005092	MF	GO:0005092	GDP-dissociation inhibitor activity	3/602	16/18496	0.0140021	0.105977	0.0898792	GPSM2/RANBP1/CCDC88A	3	1.875
GO:0050135	MF	GO:0050135	NAD(P)+ nucleosidase activity	3/602	16/18496	0.0140021	0.105977	0.0898792	TLR4/TLR2/CD38	3	1.875
GO:0061809	MF	GO:0061809	NAD+ nucleotidase, cyclic ADP-ribose generating	3/602	16/18496	0.0140021	0.105977	0.0898792	TLR4/TLR2/CD38	3	1.875
GO:0004712	MF	GO:0004712	protein serine/threonine/tyrosine kinase activity	5/602	45/18496	0.0150078	0.112485	0.0953995	TTK/AURKA/DYRK2/AURKB/PBK	5	1.11111
GO:0043130	MF	GO:0043130	ubiquitin binding	8/602	99/18496	0.0154436	0.114639	0.0972257	CKS2/CKS1B/TOP2A/RNF168/BUB3/RAE1/SMAD3/CXCR4	8	0.808081
GO:0032182	MF	GO:0032182	ubiquitin-like protein binding	9/602	119/18496	0.015756	0.115844	0.0982477	CKS2/CKS1B/TOP2A/RNF168/BUB3/RAE1/SMAD3/CASP8AP2/CXCR4	9	0.756303
GO:0008378	MF	GO:0008378	galactosyltransferase activity	4/602	31/18496	0.0174131	0.12682	0.107557	UGT8/B3GALT6/B3GNT3/COLGALT1	4	1.29032
GO:0002020	MF	GO:0002020	protease binding	10/602	142/18496	0.0178288	0.128634	0.109095	DPP4/BRCA2/F3/RIPK2/CRADD/BCL2L10/FAM20C/CD177/VWF/SELL	10	0.704225
GO:0140098	MF	GO:0140098	catalytic activity, acting on RNA	21/602	395/18496	0.0195121	0.139475	0.11829	BRIP1/PRIM1/EXO1/FEN1/RNASEH2A/G3BP1/POLR3C/CNOT7/POP7/PIF1/SUPV3L1/ISG20/POLR1D/FANCM/METTL3/POLR2I/ANG/POLR3K/AZGP1/DDX39A/CNOT6L	21	0.531646
GO:0004540	MF	GO:0004540	RNA nuclease activity	9/602	124/18496	0.02008	0.142218	0.120615	EXO1/FEN1/RNASEH2A/CNOT7/POP7/ISG20/ANG/AZGP1/CNOT6L	9	0.725806
GO:0030296	MF	GO:0030296	protein tyrosine kinase activator activity	4/602	33/18496	0.0215252	0.151068	0.128121	EREG/NRG1/TGFA/HBEGF	4	1.21212
GO:0008409	MF	GO:0008409	5'-3' exonuclease activity	3/602	19/18496	0.0225449	0.156799	0.132982	EXO1/FEN1/DCLRE1B	3	1.57895
GO:0042826	MF	GO:0042826	histone deacetylase binding	9/602	127/18496	0.0230529	0.1589	0.134764	PARP1/KPNA2/HDAC2/CCND1/NUDT21/BRMS1L/LEF1/CBX5/HEY2	9	0.708661
GO:0016891	MF	GO:0016891	RNA endonuclease activity, producing 5'-phosphomonoesters	4/602	34/18496	0.0237852	0.161072	0.136606	EXO1/FEN1/RNASEH2A/POP7	4	1.17647
GO:0140597	MF	GO:0140597	protein carrier chaperone	4/602	34/18496	0.0237852	0.161072	0.136606	ANP32E/ASF1B/TIMM9/CLU	4	1.17647
GO:0005154	MF	GO:0005154	epidermal growth factor receptor binding	4/602	35/18496	0.0261837	0.175772	0.149073	EREG/TGFA/CCDC88A/HBEGF	4	1.14286
GO:0016504	MF	GO:0016504	peptidase activator activity	5/602	52/18496	0.0265626	0.176779	0.149927	PSMD14/PSME4/APAF1/CASP8AP2/PCOLCE2	5	0.961538
GO:0031491	MF	GO:0031491	nucleosome binding	6/602	71/18496	0.0278975	0.184076	0.156116	RNF168/PARP1/HMGN2/HDAC2/EED/HIRA	6	0.84507
GO:0008146	MF	GO:0008146	sulfotransferase activity	5/602	53/18496	0.0285721	0.185359	0.157204	HS6ST2/CHST4/TPST2/CHST2/SULT2B1	5	0.943396
GO:0050661	MF	GO:0050661	NADP binding	5/602	53/18496	0.0285721	0.185359	0.157204	DHFR/LBR/MTRR/DPYD/TP53I3	5	0.943396
GO:0001664	MF	GO:0001664	G protein-coupled receptor binding	16/602	291/18496	0.0292834	0.18839	0.159774	STAT1/CTHRC1/CXCL8/EDN3/CXCL9/EDN2/CCL4/CXCL12/CXCL1/CXCL10/HOMER1/CXCL14/CCL22/CCL18/CXCL11/NDP	16	0.549828
GO:0008408	MF	GO:0008408	3'-5' exonuclease activity	5/602	55/18496	0.0328733	0.209737	0.177879	CNOT7/POLE/ISG20/POLD1/CNOT6L	5	0.909091
GO:0016881	MF	GO:0016881	acid-amino acid ligase activity	3/602	22/18496	0.0333531	0.211054	0.178996	PAICS/GCLC/GCLM	3	1.36364
GO:0043531	MF	GO:0043531	ADP binding	4/602	38/18496	0.0342228	0.214797	0.18217	APAF1/MSH2/GCLC/TAP1	4	1.05263
GO:0016922	MF	GO:0016922	nuclear receptor binding	9/602	137/18496	0.0352194	0.219269	0.185963	PCNA/PARP1/SMAD3/STAT1/ETS2/ESR1/LEF1/MED1/NR4A2	9	0.656934
GO:1901681	MF	GO:1901681	sulfur compound binding	15/602	275/18496	0.0361451	0.223232	0.189324	RRM2/SLIT3/METTL3/CXCL8/ANG/SELP/PRMT1/CXCL10/PCOLCE2/HBEGF/COL5A3/CXCL11/NELL2/PTPRC/SELL	15	0.545455
GO:0001530	MF	GO:0001530	lipopolysaccharide binding	4/602	39/18496	0.0371868	0.227676	0.193093	CD14/TLR4/TLR2/SELP	4	1.02564
GO:0016493	MF	GO:0016493	C-C chemokine receptor activity	3/602	23/18496	0.0374545	0.227676	0.193093	CXCR3/CXCR4/CXCR2	3	1.30435
GO:0001216	MF	GO:0001216	DNA-binding transcription activator activity	23/602	475/18496	0.038452	0.228726	0.193984	MYBL2/E2F1/E2F2/FOXA1/SMAD3/EGR1/EPAS1/REL/ESR1/SOX2/TFDP1/MYB/ETV1/TP73/LEF1/E2F3/ATF3/IRF5/ASCL2/PLAGL1/MYC/NR4A2/GATA2	23	0.484211
GO:0016835	MF	GO:0016835	carbon-oxygen lyase activity	6/602	77/18496	0.0393369	0.228726	0.193984	POLQ/CA9/ENO3/FH/ENO2/XRCC6	6	0.779221
GO:0001056	MF	GO:0001056	RNA polymerase III activity	2/602	10/18496	0.0400239	0.228726	0.193984	POLR1D/POLR3K	2	2
GO:0032356	MF	GO:0032356	oxidized DNA binding	2/602	10/18496	0.0400239	0.228726	0.193984	BLM/MSH2	2	2
GO:0034511	MF	GO:0034511	U3 snoRNA binding	2/602	10/18496	0.0400239	0.228726	0.193984	ISG20/PRKDC	2	2
GO:0051880	MF	GO:0051880	G-quadruplex DNA binding	2/602	10/18496	0.0400239	0.228726	0.193984	BLM/PIF1	2	2
GO:0098505	MF	GO:0098505	G-rich strand telomeric DNA binding	2/602	10/18496	0.0400239	0.228726	0.193984	RPA1/RPA2	2	2
GO:1904680	MF	GO:1904680	peptide transmembrane transporter activity	2/602	10/18496	0.0400239	0.228726	0.193984	TAP2/TAP1	2	2
GO:0004520	MF	GO:0004520	DNA endonuclease activity	4/602	40/18496	0.0402937	0.228726	0.193984	EXO1/FEN1/RAD51C/MBD4	4	1
GO:0008186	MF	GO:0008186	ATP-dependent activity, acting on RNA	6/602	78/18496	0.0414937	0.233819	0.198303	BRIP1/G3BP1/PIF1/SUPV3L1/FANCM/DDX39A	6	0.769231
GO:0019957	MF	GO:0019957	C-C chemokine binding	3/602	24/18496	0.0418007	0.233842	0.198322	CXCR3/CXCR4/CXCR2	3	1.25
GO:0001046	MF	GO:0001046	core promoter sequence-specific DNA binding	4/602	41/18496	0.0435437	0.240112	0.20364	EZH2/STAT1/MMP12/MYC	4	0.97561
GO:0042169	MF	GO:0042169	SH2 domain binding	4/602	41/18496	0.0435437	0.240112	0.20364	SHCBP1/PTK2/CCDC88A/SYK	4	0.97561
GO:0031625	MF	GO:0031625	ubiquitin protein ligase binding	16/602	308/18496	0.0453142	0.246441	0.209007	AURKA/BRCA1/PARP1/UBE2T/RB1/FANCL/BID/CASP8/SMAD3/RPA2/SMC6/CXCR4/TUBB/CHEK2/AXIN2/CLU	16	0.519481
GO:0008139	MF	GO:0008139	nuclear localization sequence binding	3/602	25/18496	0.0463883	0.246441	0.209007	KPNA2/NUP98/NUP153	3	1.2
GO:0043028	MF	GO:0043028	cysteine-type endopeptidase regulator activity involved in apoptotic process	4/602	42/18496	0.0469367	0.246441	0.209007	APAF1/CASP8AP2/CD27/BIRC3	4	0.952381
GO:0019955	MF	GO:0019955	cytokine binding	9/602	145/18496	0.0476829	0.246441	0.209007	IFNGR1/CXCR3/CXCR4/IFNAR1/ENG/OSMR/IL12RB2/CXCR2/BGN	9	0.62069
GO:0016725	MF	GO:0016725	oxidoreductase activity, acting on CH or CH2 groups	2/602	11/18496	0.0478835	0.246441	0.209007	RRM2/RRM1	2	1.81818
GO:0042975	MF	GO:0042975	peroxisome proliferator activated receptor binding	2/602	11/18496	0.0478835	0.246441	0.209007	DUT/MED1	2	1.81818
GO:0047429	MF	GO:0047429	nucleoside triphosphate diphosphatase activity	2/602	11/18496	0.0478835	0.246441	0.209007	DCTPP1/DUT	2	1.81818
GO:0070513	MF	GO:0070513	death domain binding	2/602	11/18496	0.0478835	0.246441	0.209007	BAX/CRADD	2	1.81818
GO:0140666	MF	GO:0140666	annealing activity	2/602	11/18496	0.0478835	0.246441	0.209007	BLM/RAD54L	2	1.81818
GO:0140852	MF	GO:0140852	histone ubiquitin ligase activity	2/602	11/18496	0.0478835	0.246441	0.209007	UHRF1/RNF168	2	1.81818
