# Supplementary material
Source: Research Square preprint supplement (doi:10.21203/rs.3.rs-8884166/v1)
Supplement: Supplementary file 6 [file be4a3126713a533bcf147572.xlsx]

## Sheet: Online Resource 6
symbol	Immunecell	correlation	pvalue
PLAU	B.cell	-0.245977	0.000365427
PLAU	T.cell.CD4.	0.0178999	0.798438
PLAU	T.cell.CD8.	0.0340914	0.626635
PLAU	Neutrophil	0.314259	4.22E-06
PLAU	Macrophage	-0.0499411	0.475924
CXCL8	B.cell	-0.133744	0.0552973
CXCL8	T.cell.CD4.	-0.31862	3.05E-06
CXCL8	T.cell.CD8.	-0.207185	0.00280755
CXCL8	Neutrophil	0.119582	0.0868916
CXCL8	Macrophage	-0.325104	1.86E-06
ALKBH2	B.cell	-0.00257184	0.970734
ALKBH2	T.cell.CD4.	-0.0758023	0.27885
ALKBH2	T.cell.CD8.	0.0493907	0.480806
ALKBH2	Neutrophil	-0.221412	0.00138234
ALKBH2	Macrophage	-0.150907	0.0303761
TFPI2	B.cell	0.124922	0.0736031
TFPI2	T.cell.CD4.	0.136364	0.0506517
TFPI2	T.cell.CD8.	0.138363	0.0473292
TFPI2	Neutrophil	0.185956	0.00744827
TFPI2	Macrophage	0.107522	0.123973
