# Supplementary material
Source: Research Square preprint supplement (doi:10.21203/rs.3.rs-8884166/v1)
Supplement: Supplementary file 7 [file c2c5c1bd50fc23586019fa5e.xlsx]

## Sheet: Sheet1
primer	sequence
ALKBH2 F	ACGGACGTGTTGCAGTGATA
ALKBH2 R	AAGCGAGACGCAAAGAGGTT
TFPI2 F	CAGGAGCCAACAGACTACGG
TFPI2 R	AGAAATTGTTGGCGTTGCCC
PLAU F	CGTGAGCGACTCCAAAGTGA
PLAU R	GTGGATGGAATCCGGAGGAC
CXCL8 F	ACCCCAAGGAAAACTGGGTG
CXCL8 R	GGTCATGAGTACAACAAACTCACT
Internal reference H-GAPDH F	ATGGGCAGCCGTTAGGAAAG
Internal reference H-GAPDH R	AGGAAAAGCATCACCCGGAG
	sequence
